# Supplementary material for: Venomix: a simple bioinformatic pipeline for identifying and characterizing toxin gene candidates from transcriptomic data
Source: PeerJ journal article supplement (doi:10.7717/peerj.5361), 2018-07-31
Supplement: S_F_1_C_sponsalis.tar.gz [file S_F_1_C_sponsalis.tar.gz]

*D6C4H9*

*TRINITY DN10412 c0 g1 TRINITY DN10412 c0 g1 i2g.1m.1*

*TRINITY DN10412 c0 g1 TRINITY DN10412 c0 g1 i8g.2m.2*
