# Supplementary material for: Venomix: a simple bioinformatic pipeline for identifying and characterizing toxin gene candidates from transcriptomic data
Source: PeerJ journal article supplement (doi:10.7717/peerj.5361), 2018-07-31
Supplement: S_F_1_C_sponsalis.tar.gz [file S_F_1_C_sponsalis.tar.gz]

— *TRINITY DN9556 c0 g1* *TRINITY DN9556 c0 g1 i2g.3m.3*

— *TRINITY DN9556 c0 g2* *TRINITY DN9556 c0 g2 i1g.8m.8*

— *TRINITY DN9556 c0 g2* *TRINITY DN9556 c0 g2 i2g.9m.9*
