# Supplementary material for: Venomix: a simple bioinformatic pipeline for identifying and characterizing toxin gene candidates from transcriptomic data
Source: PeerJ journal article supplement (doi:10.7717/peerj.5361), 2018-07-31
Supplement: S_F_1_C_sponsalis.tar.gz [file S_F_1_C_sponsalis.tar.gz]

*TRINITY DN10238 c2 g3TRINITY DN10238 c2 g3 i2g.2m.2*

*TRINITY DN10238 c2 g3TRINITY DN10238 c2 g3 i1g.1m.1*

*Q76B45*

*TRINITY DN10238 c2 g3TRINITY DN10238 c2 g3 i0g.3m.3*

*TRINITY DN10238 c2 g3TRINITY DN10238 c2 g3 i18g.4m.4*
