# Supplementary material for: Venomix: a simple bioinformatic pipeline for identifying and characterizing toxin gene candidates from transcriptomic data
Source: PeerJ journal article supplement (doi:10.7717/peerj.5361), 2018-07-31
Supplement: S_F_1_C_sponsalis.tar.gz [file S_F_1_C_sponsalis.tar.gz]

*TRINITY DN10125 c0 g1 TRINITY DN10125 c0 g1 i3g.5m.5*

*TRINITY DN10125 c0 g1 TRINITY DN10125 c0 g1 i2g.3m.3*

Q6T269

*TRINITY DN10125 c0 g1 TRINITY DN10125 c0 g1 i1g.1m.1*
