# Supplementary material for: Venomix: a simple bioinformatic pipeline for identifying and characterizing toxin gene candidates from transcriptomic data
Source: PeerJ journal article supplement (doi:10.7717/peerj.5361), 2018-07-31
Supplement: S_F_4_T_bicarinatum_GAS.tar.gz [file S_F_4_T_bicarinatum_GAS.tar.gz]

Q6T269

*Gene.1Tb2597g.1m.1*

*Gene.3Tb16938g.3m.3*
