# Supplementary material for: Venomix: a simple bioinformatic pipeline for identifying and characterizing toxin gene candidates from transcriptomic data
Source: PeerJ journal article supplement (doi:10.7717/peerj.5361), 2018-07-31
Supplement: S_F_4_T_bicarinatum_GAS.tar.gz [file S_F_4_T_bicarinatum_GAS.tar.gz]

*P35777*

*Gene.1Tb6032g.1m.1*

*Gene.2Tb7501g.2m.2*
