# Supplementary material for: Venomix: a simple bioinformatic pipeline for identifying and characterizing toxin gene candidates from transcriptomic data
Source: PeerJ journal article supplement (doi:10.7717/peerj.5361), 2018-07-31
Supplement: S_F_5_U_yaschenkoi.tar.gz [file S_F_5_U_yaschenkoi.tar.gz]

The dendrogram displays hierarchical clustering of a large number of samples. The labels on the right side of the tree include various alphanumeric codes, such as:  
 - DN6397 c0 g2 TRINITY DN6397 c0 g2 i1g.4m.4  
 - DN32833 c0 g2 TRINITY DN32833 c0 g2 i2g.19m.19  
 - DN3675 c0 g1 TRINITY DN3675 c0 g1 i1g.34m.32  
 - DN33361 c0 g1 TRINITY DN33361 c0 g1 i1g.21m.21  
 - DN32787 c0 g1 TRINITY DN32787 c0 g1 i2g.13m.13  
 - DN30872 c0 g1 TRINITY DN30872 c0 g1 i4g.6m.6  
 - DN60035 c0 g1 TRINITY DN60035 c0 g1 i1g.29m.29  
 - DN30872 c0 g1 TRINITY DN30872 c0 g1 i4g.7m.7  
 The dendrogram shows a high degree of similarity between many of the samples, resulting in a dense cluster of branches.
