# Supplementary material for: Venomix: a simple bioinformatic pipeline for identifying and characterizing toxin gene candidates from transcriptomic data
Source: PeerJ journal article supplement (doi:10.7717/peerj.5361), 2018-07-31
Supplement: S_F_5_U_yaschenkoi.tar.gz [file S_F_5_U_yaschenkoi.tar.gz]

TRINITY DN31363 c0 g2 TRINITY DN31363 c0 g2 i4g.7m.7

TRINITY DN31363 c0 g2 TRINITY DN31363 c0 g2 i3g.6m.6

TRINITY DN31363 c0 g2 TRINITY DN31363 c0 g2 i1g.4m.4

P80003

P04362

P16354

TRINITY DN28429 c0 g2 TRINITY DN28429 c0 g2 i1g.2m.2

TRINITY DN28429 c0 g1 TRINITY DN28429 c0 g1 i1g.1m.1

TRINITY DN33366 c0 g3 TRINITY DN33366 c0 g3 i3g.12m.12

TRINITY DN33366 c0 g3 TRINITY DN33366 c0 g3 i2g.11m.11

TRINITY DN33366 c0 g3 TRINITY DN33366 c0 g3 i4g.13m.13

TRINITY DN33366 c0 g3 TRINITY DN33366 c0 g3 i1g.10m.10

Q7M4I6

P82971

TRINITY DN34500 c0 g2 TRINITY DN34500 c0 g2 i1g.14m.14

P0C8L9

TRINITY DN31363 c0 g1 TRINITY DN31363 c0 g1 i2g.9m.9

TRINITY DN31363 c0 g1 TRINITY DN31363 c0 g1 i1g.3m.3

TRINITY DN31363 c0 g2 TRINITY DN31363 c0 g2 i2g.5m.5

TRINITY DN31363 c0 g2 TRINITY DN31363 c0 g2 i5g.8m.8
