# Supplementary material for: Venomix: a simple bioinformatic pipeline for identifying and characterizing toxin gene candidates from transcriptomic data
Source: PeerJ journal article supplement (doi:10.7717/peerj.5361), 2018-07-31
Supplement: S_F_5_U_yaschenkoi.tar.gz [file S_F_5_U_yaschenkoi.tar.gz]

W4VS53

*TRINITY DN26021 c0 g1**TRINITY DN26021 c0 g1 i1g.1m.1*

*TRINITY DN39706 c1 g5**TRINITY DN39706 c1 g5 i1g.2m.2*
