# Supplementary material for: Venomix: a simple bioinformatic pipeline for identifying and characterizing toxin gene candidates from transcriptomic data
Source: PeerJ journal article supplement (doi:10.7717/peerj.5361), 2018-07-31
Supplement: S_F_5_U_yaschenkoi.tar.gz [file S_F_5_U_yaschenkoi.tar.gz]

TRINITY DN26184 c0 g1 TRINITY DN26184 c0 g1 i1g.10m.10  
TRINITY DN17008 c0 g1 TRINITY DN17008 c0 g1 i1g.3m.3  
TRINITY DN39959 c7 g6 TRINITY DN39959 c7 g6 i1g.37m.37  
TRINITY DN22926 c0 g4 TRINITY DN22926 c0 g4 i1g.9m.9  
TRINITY DN22926 c0 g3 TRINITY DN22926 c0 g3 i1g.8m.8  
TRINITY DN22926 c0 g2 TRINITY DN22926 c0 g2 i1g.7m.7  
TRINITY DN22926 c0 g1 TRINITY DN22926 c0 g1 i1g.6m.6  
TRINITY DN39743 c4 g4 TRINITY DN39743 c4 g4 i1g.36m.36  
TRINITY DN11244 c0 g2 TRINITY DN11244 c0 g2 i1g.1m.1  
Q4QXT9  
A6MFK8  
A6MEK7  
TRINITY DN39744 c0 g1 TRINITY DN39744 c0 g1 i1g.27m.27  
TRINITY DN39744 c0 g1 TRINITY DN39744 c0 g1 i4g.31m.31  
TRINITY DN39744 c0 g1 TRINITY DN39744 c0 g1 i3g.30m.30  
TRINITY DN39744 c0 g1 TRINITY DN39744 c0 g1 i8g.34m.34  
TRINITY DN39744 c0 g1 TRINITY DN39744 c0 g1 i6g.32m.32  
TRINITY DN39744 c0 g1 TRINITY DN39744 c0 g1 i2g.28m.28  
TRINITY DN31150 c0 g2 TRINITY DN31150 c0 g2 i1g.14m.14  
TRINITY DN34779 c0 g1 TRINITY DN34779 c0 g1 i6g.17m.17  
TRINITY DN34779 c0 g1 TRINITY DN34779 c0 g1 i4g.16m.16  
TRINITY DN34779 c0 g1 TRINITY DN34779 c0 g1 i3g.15m.15  
TRINITY DN30114 c0 g1 TRINITY DN30114 c0 g1 i1g.13m.13  
Q7M4I3  
TRINITY DN21115 c0 g1 TRINITY DN21115 c0 g1 i1g.4m.4  
TRINITY DN16473 c0 g1 TRINITY DN16473 c0 g1 i1g.2m.2  
TRINITY DN28897 c0 g2 TRINITY DN28897 c0 g2 i1g.12m.12  
TRINITY DN28897 c0 g1 TRINITY DN28897 c0 g1 i1g.11m.11  
TRINITY DN38496 c0 g1 TRINITY DN38496 c0 g1 i5g.24m.24  
TRINITY DN38496 c0 g1 TRINITY DN38496 c0 g1 i4g.22m.22  
TRINITY DN38496 c0 g1 TRINITY DN38496 c0 g1 i6g.26m.26  
TRINITY DN38496 c0 g1 TRINITY DN38496 c0 g1 i2g.21m.21  
TRINITY DN36139 c0 g1 TRINITY DN36139 c0 g1 i1g.18m.18  
TRINITY DN72429 c0 g1 TRINITY DN72429 c0 g1 i1g.38m.38  
TRINITY DN37185 c0 g1 TRINITY DN37185 c0 g1 i2g.20m.20  
TRINITY DN37185 c0 g1 TRINITY DN37185 c0 g1 i1g.19m.19
