# Supplementary material for: Venomix: a simple bioinformatic pipeline for identifying and characterizing toxin gene candidates from transcriptomic data
Source: PeerJ journal article supplement (doi:10.7717/peerj.5361), 2018-07-31
Supplement: S_F_5_U_yaschenkoi.tar.gz [file S_F_5_U_yaschenkoi.tar.gz]

*B1P1J3*

*TRINITY DN39906 c0 g2 TRINITY DN39906 c0 g2 i2g.1m.1*

*TRINITY DN51843 c0 g1 TRINITY DN51843 c0 g1 i1g.2m.2*
