# Supplementary material for: Venomix: a simple bioinformatic pipeline for identifying and characterizing toxin gene candidates from transcriptomic data
Source: PeerJ journal article supplement (doi:10.7717/peerj.5361), 2018-07-31
Supplement: S_F_5_U_yaschenkoi.tar.gz [file S_F_5_U_yaschenkoi.tar.gz]

*TRINITY DN34337 c0 g1 TRINITY DN34337 c0 g1 i5g.9m.9*

*TRINITY DN34337 c0 g1 TRINITY DN34337 c0 g1 i2g.3m.3*

*P86468*

*TRINITY DN34337 c0 g1 TRINITY DN34337 c0 g1 i4g.7m.7*

*TRINITY DN34337 c0 g1 TRINITY DN34337 c0 g1 i1g.1m.1*

*TRINITY DN34337 c0 g1 TRINITY DN34337 c0 g1 i6g.11m.11*

*TRINITY DN34337 c0 g1 TRINITY DN34337 c0 g1 i3g.5m.5*

*TRINITY DN34337 c0 g1 TRINITY DN34337 c0 g1 i7g.13m.13*

*TRINITY DN34337 c0 g1 TRINITY DN34337 c0 g1 i10g.15m.15*
