# Supplementary material for: Venomix: a simple bioinformatic pipeline for identifying and characterizing toxin gene candidates from transcriptomic data
Source: PeerJ. 2018 Jul 31;6:e5361. doi: 10.7717/peerj.5361 (PMC6074769; doi:10.7717/peerj.5361)
Supplement: Supplemental Information 1 [file peerj-06-5361-s001.xlsx]

## Sheet: S. Table 1. Transcriptomes
Table 1. Species specific information for transcriptome assemblies.
	Sequencing	Raw Reads	Transcripts	N50
C. sponsalis	PE-100bp	26,419,249 (-8.9%)	53,349 (+22.0%)	546 (-4.7%)
E. coloratus*	PE-100bp	68011342	173198	1603
T. bicarinatum*	PE-100bp	424743516	200106	881
U. yaschenkoi	PE-100bp	82,746,144 (-1.0%)	170,984 (-29. 9%)	1,248 (+8.7%)
	*indicates alternative assembly approach, so comparisons were not possible;
	PE= Paired End; bp = Base Pair

## Sheet: S.Table 2. E. coloratus
Toxin Name	Location	transcript_id	length	effective_length	expected_count	TPM	FPKM	IsoPct		Toxin Name (>1 TPM)	N		Toxin Name (>10 TPM)	N
Cathelicidin-related_peptide_Bf-CRAMP_11	Echis_coloratus_Scent_gland1	TRINITY_DN30190_c0_g1_i1	678	450.2	58071.9	6150.66	5955.94	100		C-type_lectin_6	36		C-type lectin	27
Vespryn_2	Echis_coloratus_Scent_gland1	TRINITY_DN31041_c0_g1_i1	2025	1797.2	12391	328.76	318.35	100		Disintegrin_acostatin-alpha_26	20		Disintegrin	18
Peroxiredoxin-4_1	Echis_coloratus_Scent_gland1	TRINITY_DN23630_c0_g1_i1	1517	1289.2	3142	116.21	112.53	100		Alpha-latroinsectotoxin-Lt1a_2	23		Latrotoxin	10
KappaPI-theraphotoxin-Hs1a_80	Echis_coloratus_Scent_gland1	TRINITY_DN30592_c0_g2_i1	1687	1459.2	3092	101.04	97.84	100		Factor_V_activator_RVV-V_gamma_142	18		Peptidase S1	8
Cathelicidin-related_peptide_Bf-CRAMP_11	Echis_coloratus_Scent_gland1	TRINITY_DN32268_c0_g1_i1	780	552.2	1094	94.47	91.48	100		Zinc_metalloproteinase@disintegrin_107	7		SVMP	6
Venom_prothrombin_activator_pseutarin-C_catalytic_subunit_12	Echis_coloratus_Scent_gland1	TRINITY_DN33800_c3_g1_i1	3830	3602.2	5915	78.3	75.82	100		C-type_lectin_mannose-binding_isoform_30	17		C-type lectin	5
Factor_V_activator_RVV-V_gamma_142	Echis_coloratus_Scent_gland1	TRINITY_DN18146_c0_g1_i1	2728	2500.2	3725	71.04	68.79	100		Disintegrin_bitistatin_6	8		Disintegrin	4
Cystatin-1_1	Echis_coloratus_Scent_gland1	TRINITY_DN28359_c0_g1_i1	455	227.21	338	70.93	68.69	100		Acidic_phospholipase_A2_1_322	5		PLA2	3
KappaPI-theraphotoxin-Hs1a_80	Echis_coloratus_Scent_gland1	TRINITY_DN31132_c1_g1_i1	4464	4236.2	5936.79	66.83	64.71	100		Venom_prothrombin_activator_pseutarin-C_catalytic_subunit_12	4		Peptidase S1	3
Alpha-latroinsectotoxin-Lt1a_2	Echis_coloratus_Scent_gland1	TRINITY_DN25977_c0_g2_i1	1746	1518.2	2011	63.16	61.16	100		KappaPI-theraphotoxin-Hs1a_80	9		BPTI/Kunitz inhibitor	2
Serine_proteinase-like_BMK-CBP_1	Echis_coloratus_Scent_gland1	TRINITY_DN31558_c0_g1_i1	3217	2989.2	3793	60.51	58.59	100		Vespryn_2	7		Vespryn	2
Factor_V_activator_RVV-V_gamma_142	Echis_coloratus_Scent_gland1	TRINITY_DN29921_c0_g1_i1	1249	1021.2	1030	48.09	46.57	100		Galactose-specific_lectin_nattectin_1	5		C-type lectin	2
Acidic_phospholipase_A2_1_322	Echis_coloratus_Scent_gland1	TRINITY_DN32800_c9_g4_i6	1119	891.2	866.29	46.35	44.88	100		Techylectin-like_protein_1	4		C-type lectin	2
Techylectin-like_protein_1	Echis_coloratus_Scent_gland1	TRINITY_DN8771_c0_g1_i1	1840	1612.2	1519.84	44.95	43.53	100		Peroxiredoxin-4_1	2		Peroxiredoxin	2
Venom_peptide_isomerase_heavy_chain_2	Echis_coloratus_Scent_gland1	TRINITY_DN22316_c0_g1_i1	3143	2915.2	2589	42.35	41.01	100		Disintegrin-like_leberagin-C_8	2		Disintegrin	2
KappaPI-theraphotoxin-Hs1a_80	Echis_coloratus_Scent_gland1	TRINITY_DN33835_c0_g2_i1	3197	2969.2	2620.78	42.09	40.76	100		Snake_venom_vascular_endothelial_growth_factor_toxin_VR-1_1	2		VEGF	1
KappaPI-theraphotoxin-Hs1a_80	Echis_coloratus_Scent_gland1	TRINITY_DN34880_c0_g1_i2	3735	3507.2	2919.37	39.69	38.43	100		Plancitoxin-1_1	2		Dnase II	1
Cysteine-rich_venom_protein_Mr30_2	Echis_coloratus_Scent_gland1	TRINITY_DN35289_c9_g1_i1	3514	3286.2	2608	37.84	36.64	100		Glutaminyl-peptide_cyclotransferase_1	2		Other	1
Vespryn_2	Echis_coloratus_Scent_gland1	TRINITY_DN35507_c1_g1_i1	2363	2135.2	1687	37.67	36.48	100		Cysteine-rich_venom_protein_25-A_6	1		CRISP	1
Acidic_phospholipase_A2_1_322	Echis_coloratus_Scent_gland1	TRINITY_DN32800_c9_g4_i4	1705	1477.2	1130.5	36.49	35.34	100		Cystatin-1_1	1		Other	1
Alpha-latroinsectotoxin-Lt1a_2	Echis_coloratus_Scent_gland1	TRINITY_DN25537_c0_g1_i1	2394	2166.2	1530	33.68	32.61	100		Cysteine-rich_venom_protein_asurin-1_1	1		CRISP	1
Disintegrin_bitistatin_6	Echis_coloratus_Scent_gland1	TRINITY_DN31382_c0_g1_i1	4774	4546.2	3130	32.83	31.79	100		Kunitz-type_serine_protease_inhibitor_bitisilin-3_1	1		BPTI/Kunitz inhibitor	1
Techylectin-like_protein_1	Echis_coloratus_Scent_gland1	TRINITY_DN45640_c0_g1_i1	2266	2038.2	1171	27.4	26.53	100		L-amino-acid_oxidase_1	1		Other	1
Vespryn_2	Echis_coloratus_Scent_gland1	TRINITY_DN35266_c7_g1_i1	2376	2148.2	1102	24.46	23.69	100		Nawaprin_1	1		Other	1
Alpha-latroinsectotoxin-Lt1a_2	Echis_coloratus_Scent_gland1	TRINITY_DN15481_c0_g2_i2	2039	1811.2	913.96	24.06	23.3	100		Kunitz-type_serine_protease_inhibitor_2_4	1		BPTI/Kunitz inhibitor	1
Alpha-latroinsectotoxin-Lt1a_2	Echis_coloratus_Scent_gland1	TRINITY_DN34198_c0_g1_i2	1299	1071.2	510.93	22.74	22.02	100		Acetylcholinesterase-1_1	7
Hyaluronidase_1	Echis_coloratus_Scent_gland1	TRINITY_DN31407_c1_g1_i1	2423	2195.2	1011	21.96	21.27	100		Hyaluronidase_1	3
Techylectin-like_protein_1	Echis_coloratus_Scent_gland1	TRINITY_DN31345_c0_g1_i1	1581	1353.2	613	21.6	20.92	100		Hyaluronidase_CdtHya1_1	2
Neprilysin-1_1	Echis_coloratus_Scent_gland1	TRINITY_DN35347_c1_g1_i1	4029	3801.2	1504	18.87	18.27	100		Cysteine-rich_venom_protein_Mr30_2	2
Alpha-latroinsectotoxin-Lt1a_2	Echis_coloratus_Scent_gland1	TRINITY_DN35129_c0_g1_i2	6469	6241.2	2024.35	15.47	14.98	100		Astacin-like_metalloprotease_toxin_1_1	2
Vespryn_2	Echis_coloratus_Scent_gland1	TRINITY_DN35289_c12_g1_i2	1271	1043.2	303.55	13.87	13.44	100		Venom_allergen_3_30	2
Alpha-latroinsectotoxin-Lt1a_2	Echis_coloratus_Scent_gland1	TRINITY_DN13709_c0_g2_i1	1533	1305.2	378.95	13.84	13.41	100		Delta-latroinsectotoxin-Lt1a_1	1
Alpha-latroinsectotoxin-Lt1a_2	Echis_coloratus_Scent_gland1	TRINITY_DN31711_c0_g1_i1	3876	3648.2	1022	13.36	12.93	100		Putative_protein-glutamate_O-methyltransferase_1	1
Venom_prothrombin_activator_pseutarin-C_catalytic_subunit_12	Echis_coloratus_Scent_gland1	TRINITY_DN8985_c0_g1_i1	2674	2446.2	664	12.94	12.53	100		Basic_phospholipase_A2_2_60	1
Techylectin-like_protein_1	Echis_coloratus_Scent_gland1	TRINITY_DN15893_c0_g1_i1	2394	2166.2	587	12.92	12.51	100		Cystatin_2	1
KappaPI-theraphotoxin-Hs1a_80	Echis_coloratus_Scent_gland1	TRINITY_DN33835_c0_g2_i2	3233	3005.2	802.22	12.73	12.33	100		Turripeptide_Ici9	1
L-amino-acid_oxidase_31	Echis_coloratus_Scent_gland1	TRINITY_DN34322_c3_g1_i1	4698	4470.2	1091.49	11.64	11.27	100		Neprilysin-1_1	1
Alpha-latroinsectotoxin-Lt1a_2	Echis_coloratus_Scent_gland1	TRINITY_DN32857_c0_g5_i2	4365	4137.2	1006.28	11.6	11.23	100		L-amino-acid_oxidase_31	1
Factor_V_activator_RVV-V_gamma_142	Echis_coloratus_Scent_gland1	TRINITY_DN34480_c0_g1_i1	3664	3436.2	820.33	11.38	11.02	100
Alpha-latroinsectotoxin-Lt1a_2	Echis_coloratus_Scent_gland1	TRINITY_DN26236_c0_g1_i3	3856	3628.2	841.77	11.06	10.71	100
Vespryn_2	Echis_coloratus_Scent_gland1	TRINITY_DN35621_c0_g1_i1	1625	1397.2	322.7	11.01	10.66	100
Vespryn_2	Echis_coloratus_Scent_gland1	TRINITY_DN30224_c0_g2_i4	1664	1436.2	311.88	10.35	10.03	100
Alpha-latroinsectotoxin-Lt1a_2	Echis_coloratus_Scent_gland1	TRINITY_DN21939_c0_g1_i1	2306	2078.2	450.94	10.35	10.02	100
C-type_lectin_6	Echis_coloratus_Scent_gland1	TRINITY_DN15830_c0_g1_i1	864	636.2	132.84	9.96	9.64	100
Delta-latroinsectotoxin-Lt1a_1	Echis_coloratus_Scent_gland1	TRINITY_DN33163_c0_g1_i2	1891	1663.2	346.56	9.94	9.62	100
Alpha-latroinsectotoxin-Lt1a_2	Echis_coloratus_Scent_gland1	TRINITY_DN33337_c1_g1_i3	6197	5969.2	1234.92	9.86	9.55	100
Alpha-latroinsectotoxin-Lt1a_2	Echis_coloratus_Scent_gland1	TRINITY_DN27307_c0_g1_i4	863	635.2	129.84	9.75	9.44	100
Alpha-latroinsectotoxin-Lt1a_2	Echis_coloratus_Scent_gland1	TRINITY_DN34198_c0_g1_i3	3834	3606.2	720.54	9.53	9.23	100
Delta-latroinsectotoxin-Lt1a_1	Echis_coloratus_Scent_gland1	TRINITY_DN19810_c0_g1_i2	1782	1554.2	305.17	9.36	9.07	100
Alpha-latroinsectotoxin-Lt1a_2	Echis_coloratus_Scent_gland1	TRINITY_DN34658_c0_g1_i1	3081	2853.2	559.23	9.35	9.05	100
Alpha-latroinsectotoxin-Lt1a_2	Echis_coloratus_Scent_gland1	TRINITY_DN33449_c0_g1_i1	4471	4243.2	803	9.02	8.74	100
Snake_venom_vascular_endothelial_growth_factor_toxin_VR-1_1	Echis_coloratus_Scent_gland1	TRINITY_DN33279_c0_g1_i1	1129	901.2	165.57	8.76	8.48	100
Alpha-latroinsectotoxin-Lt1a_2	Echis_coloratus_Scent_gland1	TRINITY_DN14806_c0_g3_i1	1803	1575.2	274.95	8.32	8.06	100
Techylectin-like_protein_1	Echis_coloratus_Scent_gland1	TRINITY_DN8771_c0_g2_i1	1841	1613.2	271.16	8.01	7.76	100
Acidic_phospholipase_A2_1_322	Echis_coloratus_Scent_gland1	TRINITY_DN32800_c9_g4_i5	1753	1525.2	236.48	7.39	7.16	100
Techylectin-like_protein_1	Echis_coloratus_Scent_gland1	TRINITY_DN33994_c0_g1_i1	3909	3681.2	569.67	7.38	7.15	100
Techylectin-like_protein_1	Echis_coloratus_Scent_gland1	TRINITY_DN35556_c1_g2_i1	6133	5905.2	864	6.98	6.76	100
Techylectin-like_protein_1	Echis_coloratus_Scent_gland1	TRINITY_DN26143_c0_g1_i1	4243	4015.2	573	6.8	6.59	100
Vespryn_2	Echis_coloratus_Scent_gland1	TRINITY_DN31521_c0_g1_i2	2476	2248.2	316.28	6.71	6.5	100
Cysteine-rich_venom_protein_bucarin_1	Echis_coloratus_Scent_gland1	TRINITY_DN29356_c0_g1_i1	1359	1131.2	155	6.53	6.33	100
Zinc_metalloproteinase@disintegrin_107	Echis_coloratus_Scent_gland1	TRINITY_DN24586_c0_g1_i1	2920	2692.2	361	6.39	6.19	100
Disintegrin_bitistatin_6	Echis_coloratus_Scent_gland1	TRINITY_DN34341_c0_g1_i5	4111	3883.2	517.82	6.36	6.16	100
Long-sarafotoxin_1	Echis_coloratus_Scent_gland1	TRINITY_DN27050_c0_g1_i1	1485	1257.2	167	6.33	6.13	100
Alpha-latroinsectotoxin-Lh1a_1	Echis_coloratus_Scent_gland1	TRINITY_DN35390_c1_g1_i4	5468	5240.2	672.45	6.12	5.93	100
Factor_V_activator_RVV-V_gamma_142	Echis_coloratus_Scent_gland1	TRINITY_DN31326_c5_g1_i3	1541	1313.2	165.51	6.01	5.82	100
Acetylcholinesterase-1_1	Echis_coloratus_Scent_gland1	TRINITY_DN66113_c0_g1_i1	2868	2640.2	324	5.85	5.67	100
Techylectin-like_protein_1	Echis_coloratus_Scent_gland1	TRINITY_DN33994_c0_g1_i2	3712	3484.2	421.15	5.76	5.58	100
Factor_V_activator_RVV-V_gamma_142	Echis_coloratus_Scent_gland1	TRINITY_DN26483_c0_g1_i1	3509	3281.2	383	5.57	5.39	100
Vespryn_2	Echis_coloratus_Scent_gland1	TRINITY_DN33481_c6_g3_i2	2841	2613.2	284.17	5.19	5.02	100
C-type_lectin_6	Echis_coloratus_Scent_gland1	TRINITY_DN18620_c1_g1_i1	3752	3524.2	376	5.09	4.93	100
Disintegrin_acostatin-alpha_26	Echis_coloratus_Scent_gland1	TRINITY_DN3040_c0_g1_i1	341	113.23	12	5.05	4.89	100
Disintegrin_bitistatin_6	Echis_coloratus_Scent_gland1	TRINITY_DN26478_c0_g1_i2	4088	3860.2	383.72	4.74	4.59	100
KappaPI-theraphotoxin-Hs1a_80	Echis_coloratus_Scent_gland1	TRINITY_DN31132_c1_g1_i2	2566	2338.2	232.21	4.74	4.59	100
Alpha-latroinsectotoxin-Lt1a_2	Echis_coloratus_Scent_gland1	TRINITY_DN26306_c0_g1_i2	2284	2056.2	204	4.73	4.58	100
Vespryn_2	Echis_coloratus_Scent_gland1	TRINITY_DN33626_c0_g1_i1	2580	2352.2	233	4.72	4.57	100
Techylectin-like_protein_1	Echis_coloratus_Scent_gland1	TRINITY_DN45682_c0_g1_i1	2641	2413.2	235.36	4.65	4.5	100
Disintegrin_bitistatin_6	Echis_coloratus_Scent_gland1	TRINITY_DN72249_c0_g1_i1	344	116.22	11	4.51	4.37	100
Disintegrin_bitistatin_6	Echis_coloratus_Scent_gland1	TRINITY_DN75888_c0_g1_i1	1234	1006.2	95	4.5	4.36	100
Neutral_phospholipase_A2_3_21	Echis_coloratus_Scent_gland1	TRINITY_DN32800_c9_g4_i7	1012	784.2	73.31	4.46	4.32	100
Alpha-latroinsectotoxin-Lt1a_2	Echis_coloratus_Scent_gland1	TRINITY_DN34704_c3_g2_i1	2187	1959.2	180.52	4.39	4.25	100
Snake_venom_vascular_endothelial_growth_factor_toxin_VR-1_1	Echis_coloratus_Scent_gland1	TRINITY_DN28613_c0_g1_i1	2262	2034.2	183	4.29	4.15	100
Disintegrin_bitistatin_6	Echis_coloratus_Scent_gland1	TRINITY_DN28724_c0_g1_i1	4028	3800.2	339.59	4.26	4.13	100
Factor_V_activator_RVV-V_gamma_142	Echis_coloratus_Scent_gland1	TRINITY_DN31326_c5_g1_i2	1480	1252.2	112.08	4.27	4.13	100
Factor_V_activator_RVV-V_gamma_142	Echis_coloratus_Scent_gland1	TRINITY_DN24132_c1_g1_i1	1160	932.2	83	4.25	4.11	100
L-amino-acid_oxidase_31	Echis_coloratus_Scent_gland1	TRINITY_DN35018_c0_g1_i2	1607	1379.2	120.43	4.16	4.03	100
Alpha-latroinsectotoxin-Lt1a_2	Echis_coloratus_Scent_gland1	TRINITY_DN24230_c0_g1_i1	2150	1922.2	167	4.14	4.01	100
C-type_lectin_mannose-binding_isoform_30	Echis_coloratus_Scent_gland1	TRINITY_DN35405_c2_g1_i1	309	81.23	7	4.11	3.98	100
Alpha-latroinsectotoxin-Lt1a_2	Echis_coloratus_Scent_gland1	TRINITY_DN34952_c5_g5_i2	6098	5870.2	498.51	4.05	3.92	100
Alpha-latroinsectotoxin-Lt1a_2	Echis_coloratus_Scent_gland1	TRINITY_DN33201_c0_g1_i1	4792	4564.2	385	4.02	3.89	100
Alpha-latroinsectotoxin-Lt1a_2	Echis_coloratus_Scent_gland1	TRINITY_DN22087_c0_g1_i2	4660	4432.2	370.69	3.99	3.86	100
Alpha-latroinsectotoxin-Lt1a_2	Echis_coloratus_Scent_gland1	TRINITY_DN28368_c0_g1_i3	8329	8101.2	675.99	3.98	3.85	100
C-type_lectin_mannose-binding_isoform_30	Echis_coloratus_Scent_gland1	TRINITY_DN35405_c0_g1_i1	2388	2160.2	180.31	3.98	3.85	100
Alpha-latroinsectotoxin-Lt1a_2	Echis_coloratus_Scent_gland1	TRINITY_DN27961_c0_g1_i1	4879	4651.2	385	3.95	3.82	100
Venom_prothrombin_activator_pseutarin-C_catalytic_subunit_12	Echis_coloratus_Scent_gland1	TRINITY_DN24132_c0_g1_i1	1913	1685.2	139	3.93	3.81	100
Alpha-latroinsectotoxin-Lt1a_2	Echis_coloratus_Scent_gland1	TRINITY_DN34268_c0_g1_i2	3774	3546.2	291.05	3.91	3.79	100
Alpha-latroinsectotoxin-Lt1a_2	Echis_coloratus_Scent_gland1	TRINITY_DN33163_c0_g1_i3	1539	1311.2	104.72	3.81	3.69	100
Venom_peptide_isomerase_heavy_chain_2	Echis_coloratus_Scent_gland1	TRINITY_DN35656_c3_g2_i1	2641	2413.2	192	3.79	3.67	100
Factor_V_activator_RVV-V_gamma_142	Echis_coloratus_Scent_gland1	TRINITY_DN11559_c0_g1_i1	902	674.2	53	3.75	3.63	100
Venom_prothrombin_activator_pseutarin-C_catalytic_subunit_12	Echis_coloratus_Scent_gland1	TRINITY_DN28486_c0_g1_i1	1457	1229.2	95.36	3.7	3.58	100
Zinc_metalloproteinase@disintegrin_107	Echis_coloratus_Scent_gland1	TRINITY_DN1391_c0_g1_i1	879	651.2	50	3.66	3.55	100
Alpha-latroinsectotoxin-Lt1a_2	Echis_coloratus_Scent_gland1	TRINITY_DN21074_c0_g1_i2	2213	1985.2	152.38	3.66	3.54	100
Alpha-latroinsectotoxin-Lt1a_2	Echis_coloratus_Scent_gland1	TRINITY_DN31461_c0_g1_i1	2448	2220.2	168	3.61	3.49	100
Alpha-amylase_1	Echis_coloratus_Scent_gland1	TRINITY_DN107083_c0_g1_i1	1996	1768.2	133	3.59	3.47	100
Zinc_metalloproteinase@disintegrin_107	Echis_coloratus_Scent_gland1	TRINITY_DN34605_c1_g1_i1	3431	3203.2	240	3.57	3.46	100
Alpha-latroinsectotoxin-Lt1a_2	Echis_coloratus_Scent_gland1	TRINITY_DN26150_c0_g2_i3	4862	4634.2	343.51	3.53	3.42	100
Alpha-latroinsectotoxin-Lt1a_2	Echis_coloratus_Scent_gland1	TRINITY_DN23026_c0_g1_i1	935	707.2	51	3.44	3.33	100
Acetylcholinesterase-1_1	Echis_coloratus_Scent_gland1	TRINITY_DN31831_c1_g1_i1	2457	2229.2	155	3.32	3.21	100
KappaPI-theraphotoxin-Hs1a_80	Echis_coloratus_Scent_gland1	TRINITY_DN34243_c0_g1_i5	2698	2470.2	170.79	3.3	3.19	100
Alpha-latroinsectotoxin-Lt1a_2	Echis_coloratus_Scent_gland1	TRINITY_DN22772_c0_g1_i1	1593	1365.2	93.18	3.25	3.15	100
Phospholipase_A1_19	Echis_coloratus_Scent_gland1	TRINITY_DN9019_c0_g1_i1	2625	2397.2	163	3.24	3.14	100
Acetylcholinesterase-1_1	Echis_coloratus_Scent_gland1	TRINITY_DN10201_c0_g1_i1	929	701.2	47	3.2	3.09	100
C-type_lectin_6	Echis_coloratus_Scent_gland1	TRINITY_DN90018_c0_g1_i1	912	684.2	45	3.14	3.04	100
Vespryn_2	Echis_coloratus_Scent_gland1	TRINITY_DN35416_c4_g1_i1	2632	2404.2	153	3.03	2.94	100
Alpha-latroinsectotoxin-Lt1a_2	Echis_coloratus_Scent_gland1	TRINITY_DN28023_c0_g1_i1	4916	4688.2	292	2.97	2.88	100
Vespryn_2	Echis_coloratus_Scent_gland1	TRINITY_DN29947_c0_g1_i2	2378	2150.2	129.89	2.88	2.79	100
Alpha-latroinsectotoxin-Lt1a_2	Echis_coloratus_Scent_gland1	TRINITY_DN31171_c1_g1_i1	2262	2034.2	118.86	2.79	2.7	100
Techylectin-like_protein_1	Echis_coloratus_Scent_gland1	TRINITY_DN20787_c0_g1_i1	2501	2273.2	132	2.77	2.68	100
KappaPI-theraphotoxin-Hs1a_80	Echis_coloratus_Scent_gland1	TRINITY_DN26297_c0_g1_i3	1272	1044.2	58.81	2.69	2.6	100
Delta-latroinsectotoxin-Lt1a_1	Echis_coloratus_Scent_gland1	TRINITY_DN32464_c0_g1_i1	5169	4941.2	277.13	2.67	2.59	100
Alpha-latroinsectotoxin-Lt1a_2	Echis_coloratus_Scent_gland1	TRINITY_DN34198_c0_g1_i5	930	702.2	39.23	2.66	2.58	100
KappaPI-theraphotoxin-Hs1a_80	Echis_coloratus_Scent_gland1	TRINITY_DN34223_c8_g2_i4	6668	6440.2	359.73	2.66	2.58	100
Alpha-latroinsectotoxin-Lt1a_2	Echis_coloratus_Scent_gland1	TRINITY_DN3833_c0_g2_i1	3087	2859.2	157.38	2.62	2.54	100
Alpha-latroinsectotoxin-Lt1a_2	Echis_coloratus_Scent_gland1	TRINITY_DN31939_c1_g1_i2	1454	1226.2	66.83	2.6	2.52	100
Alpha-latroinsectotoxin-Lt1a_2	Echis_coloratus_Scent_gland1	TRINITY_DN33374_c0_g1_i2	4821	4593.2	240.83	2.5	2.42	100
Venom_prothrombin_activator_pseutarin-C_catalytic_subunit_12	Echis_coloratus_Scent_gland1	TRINITY_DN25089_c0_g2_i1	4994	4766.2	248	2.48	2.4	100
Alpha-latroinsectotoxin-Lt1a_2	Echis_coloratus_Scent_gland1	TRINITY_DN31580_c0_g1_i2	4584	4356.2	223.44	2.45	2.37	100
KappaPI-theraphotoxin-Hs1a_80	Echis_coloratus_Scent_gland1	TRINITY_DN26297_c0_g1_i1	1125	897.2	45.45	2.42	2.34	100
Vespryn_2	Echis_coloratus_Scent_gland1	TRINITY_DN35621_c0_g1_i5	2406	2178.2	109.17	2.39	2.31	100
Delta-latroinsectotoxin-Lt1a_1	Echis_coloratus_Scent_gland1	TRINITY_DN32956_c0_g1_i3	3320	3092.2	151.63	2.34	2.26	100
Disintegrin_bitistatin_6	Echis_coloratus_Scent_gland1	TRINITY_DN34649_c0_g2_i5	4073	3845.2	186.09	2.31	2.23	100
Vespryn_2	Echis_coloratus_Scent_gland1	TRINITY_DN29152_c0_g1_i1	1364	1136.2	54	2.27	2.19	100
Disintegrin_acostatin-alpha_26	Echis_coloratus_Scent_gland1	TRINITY_DN33771_c2_g1_i1	3032	2804.2	130.09	2.21	2.14	100
Alpha-latroinsectotoxin-Lt1a_2	Echis_coloratus_Scent_gland1	TRINITY_DN23273_c0_g1_i1	1402	1174.2	54	2.19	2.12	100
Alpha-latroinsectotoxin-Lt1a_2	Echis_coloratus_Scent_gland1	TRINITY_DN35549_c5_g1_i1	1453	1225.2	56	2.18	2.11	100
Alpha-latroinsectotoxin-Lt1a_2	Echis_coloratus_Scent_gland1	TRINITY_DN31939_c1_g1_i1	1462	1234.2	55.17	2.13	2.06	100
Acetylcholinesterase-1_1	Echis_coloratus_Scent_gland1	TRINITY_DN56231_c0_g1_i1	745	517.2	23	2.12	2.05	100
C-type_lectin_mannose-binding_isoform_30	Echis_coloratus_Scent_gland1	TRINITY_DN908_c0_g1_i1	2155	1927.2	84	2.08	2.01	100
Cystatin_2	Echis_coloratus_Scent_gland1	TRINITY_DN45560_c0_g1_i1	505	277.21	12	2.06	2	100
Venom_prothrombin_activator_pseutarin-C_catalytic_subunit_12	Echis_coloratus_Scent_gland1	TRINITY_DN28486_c0_g1_i11	969	741.2	31.7	2.04	1.97	100
Vespryn_2	Echis_coloratus_Scent_gland1	TRINITY_DN82210_c0_g1_i1	655	427.2	18	2.01	1.95	100
Basic_phospholipase_A2_2_60	Echis_coloratus_Scent_gland1	TRINITY_DN31485_c1_g2_i6	1736	1508.2	62.99	1.99	1.93	100
Turripeptide_Ici9	Echis_coloratus_Scent_gland1	TRINITY_DN68357_c0_g1_i1	419	191.21	8	1.99	1.93	100
Alpha-latroinsectotoxin-Lt1a_2	Echis_coloratus_Scent_gland1	TRINITY_DN34198_c0_g1_i4	3855	3627.2	151.04	1.99	1.92	100
Disintegrin_bitistatin_6	Echis_coloratus_Scent_gland1	TRINITY_DN34341_c0_g1_i3	4022	3794.2	157.44	1.98	1.92	100
Factor_V_activator_RVV-V_gamma_142	Echis_coloratus_Scent_gland1	TRINITY_DN31326_c5_g1_i1	1299	1071.2	44.02	1.96	1.9	100
Alpha-latroinsectotoxin-Lt1a_2	Echis_coloratus_Scent_gland1	TRINITY_DN11758_c0_g1_i1	5260	5032.2	204.71	1.94	1.88	100
Neprilysin-1_1	Echis_coloratus_Scent_gland1	TRINITY_DN50241_c0_g1_i1	552	324.21	13	1.91	1.85	100
Delta-latroinsectotoxin-Lt1a_1	Echis_coloratus_Scent_gland1	TRINITY_DN29416_c0_g1_i3	4394	4166.2	165.92	1.9	1.84	100
Alpha-latroinsectotoxin-Lt1a_2	Echis_coloratus_Scent_gland1	TRINITY_DN28368_c0_g1_i2	8509	8281.2	327.85	1.89	1.83	100
Alpha-latroinsectotoxin-Lt1a_2	Echis_coloratus_Scent_gland1	TRINITY_DN33849_c1_g1_i4	1009	781.2	30.5	1.86	1.8	100
Snake_venom_vascular_endothelial_growth_factor_toxin_VR-1_1	Echis_coloratus_Scent_gland1	TRINITY_DN29184_c0_g1_i1	3163	2935.2	114	1.85	1.79	100
Techylectin-like_protein_1	Echis_coloratus_Scent_gland1	TRINITY_DN22090_c0_g1_i1	3365	3137.2	120	1.82	1.77	100
Neprilysin-1_1	Echis_coloratus_Scent_gland1	TRINITY_DN60791_c0_g1_i1	645	417.2	16	1.83	1.77	100
Alpha-latroinsectotoxin-Lt1a_2	Echis_coloratus_Scent_gland1	TRINITY_DN61035_c0_g1_i1	700	472.2	18	1.82	1.76	100
Factor_V_activator_RVV-V_gamma_142	Echis_coloratus_Scent_gland1	TRINITY_DN29701_c2_g3_i1	2083	1855.2	69	1.77	1.72	100
Delta-latroinsectotoxin-Lt1a_1	Echis_coloratus_Scent_gland1	TRINITY_DN34181_c5_g2_i6	6902	6674.2	247.94	1.77	1.72	100
Alpha-latroinsectotoxin-Lt1a_2	Echis_coloratus_Scent_gland1	TRINITY_DN59746_c0_g1_i1	1250	1022.2	38	1.77	1.72	100
C-type_lectin_mannose-binding_isoform_30	Echis_coloratus_Scent_gland1	TRINITY_DN17656_c1_g1_i1	1983	1755.2	65	1.77	1.71	100
Alpha-latroinsectotoxin-Lt1a_2	Echis_coloratus_Scent_gland1	TRINITY_DN36146_c0_g1_i1	3458	3230.2	117	1.73	1.67	100
Techylectin-like_protein_1	Echis_coloratus_Scent_gland1	TRINITY_DN6877_c0_g1_i1	5005	4777.2	173	1.73	1.67	100
KappaPI-theraphotoxin-Hs1a_80	Echis_coloratus_Scent_gland1	TRINITY_DN19638_c0_g1_i1	755	527.2	19	1.72	1.66	100
KappaPI-theraphotoxin-Hs1a_80	Echis_coloratus_Scent_gland1	TRINITY_DN61208_c0_g1_i1	1759	1531.2	54	1.68	1.63	100
Turripeptide_Ici9	Echis_coloratus_Scent_gland1	TRINITY_DN27811_c1_g1_i1	2019	1791.2	62	1.65	1.6	100
Long-sarafotoxin_1	Echis_coloratus_Scent_gland1	TRINITY_DN2885_c0_g1_i1	1333	1105.2	38	1.64	1.59	100
Zinc_metalloproteinase@disintegrin_107	Echis_coloratus_Scent_gland1	TRINITY_DN36849_c0_g1_i1	1155	927.2	32	1.65	1.59	100
Techylectin-like_protein_1	Echis_coloratus_Scent_gland1	TRINITY_DN20952_c0_g1_i1	1534	1306.2	44	1.61	1.56	100
Alpha-latroinsectotoxin-Lt1a_2	Echis_coloratus_Scent_gland1	TRINITY_DN82786_c0_g1_i1	376	148.22	5	1.61	1.56	100
Techylectin-like_protein_1	Echis_coloratus_Scent_gland1	TRINITY_DN18792_c0_g1_i1	1931	1703.2	57	1.6	1.55	100
Alpha-latroinsectotoxin-Lt1a_2	Echis_coloratus_Scent_gland1	TRINITY_DN29335_c0_g1_i6	3005	2777.2	93.28	1.6	1.55	100
Factor_V_activator_RVV-V_gamma_142	Echis_coloratus_Scent_gland1	TRINITY_DN34657_c3_g1_i6	2143	1915.2	64.44	1.6	1.55	100
C-type_lectin_6	Echis_coloratus_Scent_gland1	TRINITY_DN17656_c0_g2_i1	4181	3953.2	131.65	1.59	1.54	100
Vespryn_2	Echis_coloratus_Scent_gland1	TRINITY_DN31521_c0_g1_i4	4006	3778.2	125.86	1.59	1.54	100
KappaPI-theraphotoxin-Hs1a_80	Echis_coloratus_Scent_gland1	TRINITY_DN34243_c0_g1_i8	2680	2452.2	81.58	1.59	1.54	100
Acidic_phospholipase_A2_2_1	Echis_coloratus_Scent_gland1	TRINITY_DN18326_c0_g1_i2	746	518.2	17	1.56	1.51	100
Alpha-latroinsectotoxin-Lt1a_2	Echis_coloratus_Scent_gland1	TRINITY_DN25164_c0_g1_i5	5489	5261.2	169.14	1.53	1.48	100
Alpha-latroinsectotoxin-Lt1a_2	Echis_coloratus_Scent_gland1	TRINITY_DN24907_c0_g2_i1	3387	3159.2	100	1.51	1.46	100
Alpha-latroinsectotoxin-Lt1a_2	Echis_coloratus_Scent_gland1	TRINITY_DN29621_c0_g2_i1	2646	2418.2	76.46	1.51	1.46	100
Galactose-specific_lectin_nattectin_1	Echis_coloratus_Scent_gland1	TRINITY_DN76289_c0_g1_i1	1364	1136.2	36	1.51	1.46	100
Alpha-latroinsectotoxin-Lt1a_2	Echis_coloratus_Scent_gland1	TRINITY_DN84601_c0_g1_i1	418	190.21	6	1.5	1.46	100
Alpha-latroinsectotoxin-Lt1a_2	Echis_coloratus_Scent_gland1	TRINITY_DN49694_c0_g1_i1	881	653.2	20	1.46	1.41	100
Vespryn_2	Echis_coloratus_Scent_gland1	TRINITY_DN35621_c0_g1_i6	1168	940.2	28.39	1.44	1.39	100
Alpha-latroinsectotoxin-Lt1a_2	Echis_coloratus_Scent_gland1	TRINITY_DN27065_c0_g1_i1	1998	1770.2	52.91	1.43	1.38	100
L-amino-acid_oxidase_31	Echis_coloratus_Scent_gland1	TRINITY_DN35018_c0_g1_i1	1651	1423.2	42.57	1.43	1.38	100
Venom_prothrombin_activator_pseutarin-C_catalytic_subunit_12	Echis_coloratus_Scent_gland1	TRINITY_DN28486_c0_g1_i2	1548	1320.2	39.22	1.42	1.37	100
Delta-latroinsectotoxin-Lt1a_1	Echis_coloratus_Scent_gland1	TRINITY_DN19810_c0_g2_i1	1351	1123.2	33.06	1.4	1.36	100
Neprilysin-1_1	Echis_coloratus_Scent_gland1	TRINITY_DN73537_c0_g1_i1	468	240.21	7	1.39	1.35	100
L-amino-acid_oxidase_31	Echis_coloratus_Scent_gland1	TRINITY_DN95082_c0_g1_i1	707	479.2	14	1.39	1.35	100
Alpha-latroinsectotoxin-Lt1a_2	Echis_coloratus_Scent_gland1	TRINITY_DN34213_c6_g5_i1	2787	2559.2	73	1.36	1.32	100
Venom_prothrombin_activator_pseutarin-C_catalytic_subunit_12	Echis_coloratus_Scent_gland1	TRINITY_DN33588_c0_g1_i2	4735	4507.2	127.81	1.35	1.31	100
Vespryn_2	Echis_coloratus_Scent_gland1	TRINITY_DN30224_c0_g2_i3	1692	1464.2	41.33	1.35	1.3	100
Acetylcholinesterase-1_1	Echis_coloratus_Scent_gland1	TRINITY_DN84953_c0_g1_i1	694	466.2	13	1.33	1.29	100
Alpha-latroinsectotoxin-Lt1a_2	Echis_coloratus_Scent_gland1	TRINITY_DN31171_c1_g1_i2	3685	3457.2	96.14	1.33	1.28	100
Delta-latroinsectotoxin-Lt1a_1	Echis_coloratus_Scent_gland1	TRINITY_DN34181_c5_g2_i4	2464	2236.2	61.83	1.32	1.28	100
KappaPI-theraphotoxin-Hs1a_80	Echis_coloratus_Scent_gland1	TRINITY_DN34223_c8_g2_i6	6644	6416.2	177.81	1.32	1.28	100
Alpha-latroinsectotoxin-Lt1a_2	Echis_coloratus_Scent_gland1	TRINITY_DN6562_c0_g1_i1	1235	1007.2	28	1.33	1.28	100
Acetylcholinesterase-1_1	Echis_coloratus_Scent_gland1	TRINITY_DN18899_c1_g1_i1	1137	909.2	25	1.31	1.27	100
Alpha-latroinsectotoxin-Lt1a_2	Echis_coloratus_Scent_gland1	TRINITY_DN97457_c0_g1_i1	410	182.21	5	1.31	1.27	100
Alpha-latroinsectotoxin-Lt1a_2	Echis_coloratus_Scent_gland1	TRINITY_DN49254_c0_g1_i1	781	553.2	15	1.29	1.25	100
Factor_V_activator_RVV-V_gamma_142	Echis_coloratus_Scent_gland1	TRINITY_DN77181_c0_g1_i1	935	707.2	19	1.28	1.24	100
Alpha-latroinsectotoxin-Lt1a_2	Echis_coloratus_Scent_gland1	TRINITY_DN25184_c0_g2_i1	2438	2210.2	57.33	1.24	1.2	100
KappaPI-theraphotoxin-Hs1a_80	Echis_coloratus_Scent_gland1	TRINITY_DN26297_c0_g1_i2	957	729.2	18.74	1.23	1.19	100
Venom_prothrombin_activator_pseutarin-C_catalytic_subunit_12	Echis_coloratus_Scent_gland1	TRINITY_DN113508_c0_g1_i1	346	118.22	3	1.21	1.17	100
Vespryn_2	Echis_coloratus_Scent_gland1	TRINITY_DN31521_c0_g1_i1	2360	2132.2	53.03	1.19	1.15	100
Astacin-like_metalloprotease_toxin_1_1	Echis_coloratus_Scent_gland1	TRINITY_DN30212_c0_g1_i1	1521	1293.2	31.88	1.18	1.14	100
Vespryn_2	Echis_coloratus_Scent_gland1	TRINITY_DN30224_c0_g3_i1	759	531.2	13.05	1.17	1.13	100
Alpha-latroinsectotoxin-Lt1a_2	Echis_coloratus_Scent_gland1	TRINITY_DN28192_c0_g1_i1	1411	1183.2	28.65	1.15	1.12	100
Vespryn_2	Echis_coloratus_Scent_gland1	TRINITY_DN35621_c0_g1_i10	1263	1035.2	25.1	1.16	1.12	100
Alpha-latroinsectotoxin-Lt1a_2	Echis_coloratus_Scent_gland1	TRINITY_DN48596_c0_g1_i1	353	125.22	3	1.14	1.11	100
Delta-latroinsectotoxin-Lt1a_1	Echis_coloratus_Scent_gland1	TRINITY_DN32464_c0_g1_i2	4815	4587.2	109.06	1.13	1.1	100
Venom_prothrombin_activator_pseutarin-C_catalytic_subunit_12	Echis_coloratus_Scent_gland1	TRINITY_DN53737_c0_g1_i1	312	84.23	2	1.13	1.1	100
Alpha-latroinsectotoxin-Lt1a_2	Echis_coloratus_Scent_gland1	TRINITY_DN75527_c0_g1_i1	1459	1231.2	29	1.12	1.09	100
Thrombin-like_enzyme_ancrod_11	Echis_coloratus_Scent_gland1	TRINITY_DN33991_c0_g1_i4	6454	6226.2	146.1	1.12	1.08	100
Alpha-latroinsectotoxin-Lh1a_1	Echis_coloratus_Scent_gland1	TRINITY_DN22355_c0_g1_i1	2037	1809.2	41	1.08	1.05	100
Disintegrin_bitistatin_6	Echis_coloratus_Scent_gland1	TRINITY_DN28724_c0_g1_i2	4032	3804.2	86.41	1.08	1.05	100
Alpha-latroinsectotoxin-Lt1a_2	Echis_coloratus_Scent_gland1	TRINITY_DN38217_c0_g1_i1	666	438.2	10	1.09	1.05	100
Factor_V_activator_RVV-V_gamma_142	Echis_coloratus_Scent_gland1	TRINITY_DN20457_c0_g1_i1	1158	930.2	21	1.08	1.04	100
Techylectin-like_protein_1	Echis_coloratus_Scent_gland1	TRINITY_DN36404_c0_g1_i1	554	326.21	7	1.02	0.99	100
Neprilysin-1_1	Echis_coloratus_Scent_gland1	TRINITY_DN44501_c0_g1_i1	4741	4513.2	97	1.02	0.99	100
Alpha-latroinsectotoxin-Lt1a_2	Echis_coloratus_Scent_gland1	TRINITY_DN78819_c0_g1_i1	370	142.22	3	1.01	0.97	100
Alpha-latroinsectotoxin-Lt1a_2	Echis_coloratus_Scent_gland1	TRINITY_DN90924_c0_g1_i1	1039	811.2	17	1	0.97	100
Disintegrin_acostatin-alpha_26	Echis_coloratus_Scent_gland1	TRINITY_DN33771_c2_g1_i3	3100	2872.2	59.28	0.98	0.95	100
Acetylcholinesterase-1_1	Echis_coloratus_Scent_gland1	TRINITY_DN37188_c0_g1_i1	1135	907.2	18	0.95	0.92	100
Alpha-latroinsectotoxin-Lt1a_2	Echis_coloratus_Scent_gland1	TRINITY_DN28192_c0_g1_i2	1123	895.2	17.35	0.92	0.9	100
Alpha-latroinsectotoxin-Lt1a_2	Echis_coloratus_Scent_gland1	TRINITY_DN93_c0_g2_i1	2267	2039.2	39.78	0.93	0.9	100
Alpha-latroinsectotoxin-Lt1a_2	Echis_coloratus_Scent_gland1	TRINITY_DN25164_c0_g1_i1	5600	5372.2	103.61	0.92	0.89	100
Phospholipase_A2_homolog_crotoxin_acid_subunit_CA_21	Echis_coloratus_Scent_gland1	TRINITY_DN31485_c1_g2_i2	1854	1626.2	30.58	0.9	0.87	100
Disintegrin_bitistatin_6	Echis_coloratus_Scent_gland1	TRINITY_DN17340_c0_g1_i4	1569	1341.2	25	0.89	0.86	100
Alpha-latroinsectotoxin-Lt1a_2	Echis_coloratus_Scent_gland1	TRINITY_DN31511_c0_g2_i3	9180	8952.2	165.66	0.88	0.85	100
Alpha-latroinsectotoxin-Lt1a_2	Echis_coloratus_Scent_gland1	TRINITY_DN6252_c0_g2_i1	553	325.21	6	0.88	0.85	100
Delta-latroinsectotoxin-Lt1a_1	Echis_coloratus_Scent_gland1	TRINITY_DN8532_c0_g2_i1	2007	1779.2	32.63	0.87	0.85	100
Alpha-latroinsectotoxin-Lt1a_2	Echis_coloratus_Scent_gland1	TRINITY_DN91286_c0_g1_i1	508	280.21	5	0.85	0.82	100
Alpha-latroinsectotoxin-Lt1a_2	Echis_coloratus_Scent_gland1	TRINITY_DN29554_c0_g1_i8	7022	6794.2	118.42	0.83	0.8	100
Alpha-latroinsectotoxin-Lt1a_2	Echis_coloratus_Scent_gland1	TRINITY_DN29554_c0_g1_i11	6930	6702.2	113.14	0.8	0.78	100
Vespryn_2	Echis_coloratus_Scent_gland1	TRINITY_DN96107_c0_g1_i1	405	177.22	3	0.81	0.78	100
Vespryn_2	Echis_coloratus_Scent_gland1	TRINITY_DN30224_c0_g2_i6	927	699.2	10.88	0.74	0.72	100
Alpha-latroinsectotoxin-Lt1a_2	Echis_coloratus_Scent_gland1	TRINITY_DN29554_c0_g1_i7	6929	6701.2	101.62	0.72	0.7	100
Alpha-latroinsectotoxin-Lt1a_2	Echis_coloratus_Scent_gland1	TRINITY_DN29554_c0_g1_i5	6837	6609.2	97.37	0.7	0.68	100
Techylectin-like_protein_1	Echis_coloratus_Scent_gland1	TRINITY_DN45682_c0_g2_i1	2593	2365.2	34.64	0.7	0.68	100
Disintegrin_bitistatin_6	Echis_coloratus_Scent_gland1	TRINITY_DN71639_c0_g1_i1	435	207.21	3	0.69	0.67	100
Zinc_metalloproteinase@disintegrin_107	Echis_coloratus_Scent_gland1	TRINITY_DN78133_c0_g1_i1	776	548.2	8	0.7	0.67	100
C-type_lectin_mannose-binding_isoform_30	Echis_coloratus_Scent_gland1	TRINITY_DN33940_c2_g1_i3	2408	2180.2	31.08	0.68	0.66	100
Acetylcholinesterase-1_1	Echis_coloratus_Scent_gland1	TRINITY_DN59405_c0_g1_i1	368	140.22	2	0.68	0.66	100
Alpha-latroinsectotoxin-Lt1a_2	Echis_coloratus_Scent_gland1	TRINITY_DN66383_c0_g1_i1	789	561.2	8	0.68	0.66	100
KappaPI-theraphotoxin-Hs1a_80	Echis_coloratus_Scent_gland1	TRINITY_DN105984_c0_g1_i1	1517	1289.2	17.8	0.66	0.64	100
Factor_V_activator_RVV-V_gamma_142	Echis_coloratus_Scent_gland1	TRINITY_DN34657_c3_g1_i5	1985	1757.2	23.26	0.63	0.61	100
Alpha-latroinsectotoxin-Lt1a_2	Echis_coloratus_Scent_gland1	TRINITY_DN25164_c0_g1_i3	5394	5166.2	66.68	0.62	0.6	100
Vespryn_2	Echis_coloratus_Scent_gland1	TRINITY_DN59677_c0_g1_i1	625	397.2	5	0.6	0.58	100
KappaPI-theraphotoxin-Hs1a_80	Echis_coloratus_Scent_gland1	TRINITY_DN30687_c0_g1_i4	6899	6671.2	77.2	0.55	0.53	100
Disintegrin_acostatin-alpha_26	Echis_coloratus_Scent_gland1	TRINITY_DN33771_c2_g1_i2	3347	3119.2	36.09	0.55	0.53	100
Alpha-latroinsectotoxin-Lt1a_2	Echis_coloratus_Scent_gland1	TRINITY_DN93_c0_g1_i1	2291	2063.2	23.22	0.54	0.52	100
Alpha-latroinsectotoxin-Lt1a_2	Echis_coloratus_Scent_gland1	TRINITY_DN29554_c0_g1_i15	6989	6761.2	74.81	0.53	0.51	100
Zinc_metalloproteinase@disintegrin_107	Echis_coloratus_Scent_gland1	TRINITY_DN83958_c0_g1_i1	410	182.21	2	0.52	0.51	100
Venom_prothrombin_activator_pseutarin-C_catalytic_subunit_12	Echis_coloratus_Scent_gland1	TRINITY_DN34657_c3_g6_i1	676	448.2	4.83	0.51	0.5	100
Alpha-latroinsectotoxin-Lt1a_2	Echis_coloratus_Scent_gland1	TRINITY_DN29554_c0_g1_i6	6897	6669.2	71.08	0.51	0.49	100
KappaPI-theraphotoxin-Hs1a_80	Echis_coloratus_Scent_gland1	TRINITY_DN34243_c0_g1_i6	2664	2436.2	25.9	0.51	0.49	100
Alpha-latroinsectotoxin-Lt1a_2	Echis_coloratus_Scent_gland1	TRINITY_DN27065_c0_g1_i4	1899	1671.2	16.29	0.46	0.45	100
Alpha-latroinsectotoxin-Lt1a_2	Echis_coloratus_Scent_gland1	TRINITY_DN29554_c0_g1_i16	6896	6668.2	63.68	0.46	0.44	100
Alpha-latroinsectotoxin-Lt1a_2	Echis_coloratus_Scent_gland1	TRINITY_DN25164_c0_g1_i6	5293	5065.2	45.43	0.43	0.41	100
Alpha-latroinsectotoxin-Lt1a_2	Echis_coloratus_Scent_gland1	TRINITY_DN29335_c0_g1_i1	2912	2684.2	22.88	0.41	0.39	100
Snake_venom_vascular_endothelial_growth_factor_toxin_VR-1_1	Echis_coloratus_Scent_gland1	TRINITY_DN29184_c0_g1_i8	1734	1506.2	12.2	0.39	0.37	100
Alpha-latroinsectotoxin-Lt1a_2	Echis_coloratus_Scent_gland1	TRINITY_DN31462_c0_g1_i2	1390	1162.2	8.81	0.36	0.35	100
Venom_peptide_isomerase_heavy_chain_2	Echis_coloratus_Scent_gland1	TRINITY_DN25600_c0_g1_i2	955	727.2	5.41	0.35	0.34	100
KappaPI-theraphotoxin-Hs1a_80	Echis_coloratus_Scent_gland1	TRINITY_DN34223_c8_g2_i3	6602	6374.2	46.65	0.35	0.34	100
L-amino-acid_oxidase_31	Echis_coloratus_Scent_gland1	TRINITY_DN34322_c3_g2_i1	578	350.21	2.51	0.34	0.33	100
Alpha-latroinsectotoxin-Lt1a_2	Echis_coloratus_Scent_gland1	TRINITY_DN29554_c0_g1_i12	7100	6872.2	40.6	0.28	0.27	100
Alpha-latroinsectotoxin-Lt1a_2	Echis_coloratus_Scent_gland1	TRINITY_DN29554_c0_g1_i10	7008	6780.2	37.84	0.27	0.26	100
Alpha-latroinsectotoxin-Lt1a_2	Echis_coloratus_Scent_gland1	TRINITY_DN25164_c0_g1_i2	5404	5176.2	27.61	0.25	0.25	100
Alpha-latroinsectotoxin-Lt1a_2	Echis_coloratus_Scent_gland1	TRINITY_DN27065_c0_g1_i2	1218	990.2	5.4	0.26	0.25	100
Alpha-latroinsectotoxin-Lt1a_2	Echis_coloratus_Scent_gland1	TRINITY_DN29554_c0_g1_i4	7007	6779.2	34.08	0.24	0.23	100
Alpha-latroinsectotoxin-Lt1a_2	Echis_coloratus_Scent_gland1	TRINITY_DN29554_c0_g1_i1	6915	6687.2	31.82	0.23	0.22	100
Acidic_phospholipase_A2_1_322	Echis_coloratus_Scent_gland1	TRINITY_DN32800_c9_g4_i2	1871	1643.2	7.75	0.22	0.22	100
Astacin-like_metalloprotease_toxin_1_1	Echis_coloratus_Scent_gland1	TRINITY_DN30212_c0_g1_i3	2316	2088.2	8.96	0.2	0.2	100
L-amino-acid_oxidase_31	Echis_coloratus_Scent_gland1	TRINITY_DN35719_c1_g2_i1	726	498.2	2.11	0.2	0.2	100
Vespryn_2	Echis_coloratus_Scent_gland1	TRINITY_DN35621_c0_g3_i2	482	254.21	1	0.19	0.18	100
Alpha-latroinsectotoxin-Lt1a_2	Echis_coloratus_Scent_gland1	TRINITY_DN29554_c0_g1_i14	7067	6839.2	25.45	0.18	0.17	100
Alpha-latroinsectotoxin-Lt1a_2	Echis_coloratus_Scent_gland1	TRINITY_DN29554_c0_g1_i3	6975	6747.2	23.58	0.17	0.16	100
Alpha-latroinsectotoxin-Lt1a_2	Echis_coloratus_Scent_gland1	TRINITY_DN31462_c0_g1_i3	1234	1006.2	3.49	0.17	0.16	100
Thrombin-like_enzyme_ancrod_11	Echis_coloratus_Scent_gland1	TRINITY_DN33991_c0_g1_i3	4382	4154.2	14.73	0.17	0.16	100
Alpha-latroinsectotoxin-Lt1a_2	Echis_coloratus_Scent_gland1	TRINITY_DN29554_c0_g1_i13	6882	6654.2	19.66	0.14	0.14	100
Alpha-latroinsectotoxin-Lt1a_2	Echis_coloratus_Scent_gland1	TRINITY_DN29554_c0_g1_i2	6974	6746.2	21.18	0.15	0.14	100
Disintegrin_bitistatin_6	Echis_coloratus_Scent_gland1	TRINITY_DN30039_c0_g1_i2	2793	2565.2	6.49	0.12	0.12	100
Venom_prothrombin_activator_pseutarin-C_catalytic_subunit_12	Echis_coloratus_Scent_gland1	TRINITY_DN28486_c0_g1_i6	702	474.2	0.92	0.09	0.09	100
Alpha-latroinsectotoxin-Lt1a_2	Echis_coloratus_Scent_gland1	TRINITY_DN32614_c0_g1_i1	1624	1396.2	1.82	0.06	0.06	100
KappaPI-theraphotoxin-Hs1a_80	Echis_coloratus_Scent_gland1	TRINITY_DN17218_c0_g1_i1	1758	1530.2	1.46	0.05	0.04	100
Factor_V_activator_RVV-V_gamma_142	Echis_coloratus_Scent_gland1	TRINITY_DN31326_c5_g1_i5	910	682.2	0.08	0.01	0.01	100
C-type_lectin_6	Echis_coloratus_Scent_gland1	TRINITY_DN17019_c0_g1_i3	352	124.22	0	0	0	0
Cysteine-rich_venom_protein_Mr30_2	Echis_coloratus_Scent_gland1	TRINITY_DN28194_c0_g1_i3	2442	2214.2	0	0	0	100
Cysteine-rich_venom_protein_Mr30_2	Echis_coloratus_Scent_gland1	TRINITY_DN28194_c0_g2_i11	3025	2797.2	0	0	0	100
Kunitz-type_serine_protease_inhibitor_2_4	Echis_coloratus_Scent_gland1	TRINITY_DN29752_c0_g1_i3	586	358.21	0	0	0	0
KappaPI-theraphotoxin-Hs1a_80	Echis_coloratus_Scent_gland1	TRINITY_DN29752_c0_g1_i5	586	358.21	0	0	0	0
Astacin-like_metalloprotease_toxin_1_1	Echis_coloratus_Scent_gland1	TRINITY_DN30212_c0_g1_i6	2299	2071.2	0	0	0	0
Vespryn_2	Echis_coloratus_Scent_gland1	TRINITY_DN30224_c0_g2_i2	1650	1422.2	0	0	0	0
Plancitoxin-1_1	Echis_coloratus_Scent_gland1	TRINITY_DN32796_c2_g1_i6	739	511.2	0	0	0	0
L-amino-acid_oxidase_31	Echis_coloratus_Scent_gland1	TRINITY_DN34322_c3_g1_i5	4686	4458.2	0	0	0	100
Disintegrin_acostatin-alpha_26	Echis_coloratus_Scent_gland1	TRINITY_DN34505_c7_g1_i1	1072	844.2	0	0	0	0
Alpha-latroinsectotoxin-Lt1a_2	Echis_coloratus_Scent_gland1	TRINITY_DN34704_c3_g2_i2	2227	1999.2	0	0	0	100
C-type_lectin_6	Echis_coloratus_Scent_gland1	TRINITY_DN35223_c5_g3_i7	702	474.2	0	0	0	0
C-type_lectin_6	Echis_coloratus_Scent_gland1	TRINITY_DN35223_c5_g6_i1	593	365.21	0	0	0	0
C-type_lectin_6	Echis_coloratus_Scent_gland1	TRINITY_DN35223_c5_g6_i3	673	445.2	0	0	0	0
C-type_lectin_6	Echis_coloratus_Scent_gland1	TRINITY_DN35223_c5_g6_i5	672	444.2	0	0	0	0
C-type_lectin_6	Echis_coloratus_Scent_gland1	TRINITY_DN35223_c5_g6_i6	670	442.2	0	0	0	0
Alpha-latroinsectotoxin-Lt1a_2	Echis_coloratus_Scent_gland1	TRINITY_DN35254_c1_g1_i2	843	615.2	0	0	0	0
Disintegrin_acostatin-alpha_26	Echis_coloratus_Scent_gland1	TRINITY_DN35594_c0_g2_i10	1505	1277.2	0	0	0	0
Disintegrin-like_leberagin-C_8	Echis_coloratus_Scent_gland1	TRINITY_DN35594_c0_g2_i16	269	41.31	0	0	0	0
Disintegrin_acostatin-alpha_26	Echis_coloratus_Scent_gland1	TRINITY_DN35594_c0_g2_i6	1490	1262.2	0	0	0	0
Disintegrin_acostatin-alpha_26	Echis_coloratus_Scent_gland1	TRINITY_DN35594_c0_g5_i12	289	61.24	0	0	0	0
Disintegrin_acostatin-alpha_26	Echis_coloratus_Scent_gland1	TRINITY_DN35594_c0_g5_i15	504	276.21	0	0	0	0
Disintegrin_acostatin-alpha_26	Echis_coloratus_Scent_gland1	TRINITY_DN35594_c0_g5_i5	483	255.21	0	0	0	0
Zinc_metalloproteinase@disintegrin_107	Echis_coloratus_Scent_gland1	TRINITY_DN62713_c0_g2_i1	300	72.24	0	0	0	0
Cystatin-1_1	Echis_coloratus_Skin1	TRINITY_DN28359_c2_g1_i1	1089	862.92	5682	440.99	577.43	100
KappaPI-theraphotoxin-Hs1a_80	Echis_coloratus_Skin1	TRINITY_DN29752_c0_g1_i4	586	359.92	990	184.22	241.21	100
KappaPI-theraphotoxin-Hs1a_80	Echis_coloratus_Skin1	TRINITY_DN32805_c0_g1_i3	1937	1710.92	2400.67	93.97	123.05	100
KappaPI-theraphotoxin-Hs1a_80	Echis_coloratus_Skin1	TRINITY_DN32805_c0_g1_i1	1924	1697.92	1779.21	70.18	91.89	100
Factor_V_activator_RVV-V_gamma_142	Echis_coloratus_Skin1	TRINITY_DN16858_c0_g1_i1	1296	1069.92	1060.55	66.39	86.93	100
Factor_V_activator_RVV-V_gamma_142	Echis_coloratus_Skin1	TRINITY_DN31187_c0_g1_i1	1353	1126.92	976.05	58.01	75.95	100
Peroxiredoxin-4_1	Echis_coloratus_Skin1	TRINITY_DN29239_c0_g1_i1	1120	893.92	638	47.8	62.59	100
Alpha-latroinsectotoxin-Lt1a_2	Echis_coloratus_Skin1	TRINITY_DN25435_c0_g1_i1	1281	1054.92	726	46.09	60.35	100
Alpha-latroinsectotoxin-Lt1a_2	Echis_coloratus_Skin1	TRINITY_DN14202_c0_g1_i1	1749	1522.92	1014	44.59	58.39	100
Factor_V_activator_RVV-V_gamma_142	Echis_coloratus_Skin1	TRINITY_DN35401_c0_g1_i6	1959	1732.92	1117.77	43.2	56.56	100
Alpha-latroinsectotoxin-Lt1a_2	Echis_coloratus_Skin1	TRINITY_DN31757_c0_g1_i1	3021	2794.92	1772	42.46	55.6	100
Neprilysin-1_1	Echis_coloratus_Skin1	TRINITY_DN32909_c9_g1_i1	5493	5266.92	2832	36.01	47.15	100
Kunitz-type_serine_protease_inhibitor_2_4	Echis_coloratus_Skin1	TRINITY_DN29752_c0_g1_i1	586	359.92	186	34.61	45.32	100
Delta-latroinsectotoxin-Lt1a_1	Echis_coloratus_Skin1	TRINITY_DN35070_c0_g1_i1	4763	4536.92	1828.87	27	35.35	100
Factor_V_activator_RVV-V_gamma_142	Echis_coloratus_Skin1	TRINITY_DN20457_c0_g1_i2	1359	1132.92	452.52	26.75	35.03	100
Astacin-like_metalloprotease_toxin_1_1	Echis_coloratus_Skin1	TRINITY_DN21557_c0_g1_i1	1947	1720.92	558	21.72	28.43	100
Phospholipase_A1_19	Echis_coloratus_Skin1	TRINITY_DN21835_c0_g1_i1	1873	1646.92	518	21.06	27.58	100
KappaPI-theraphotoxin-Hs1a_80	Echis_coloratus_Skin1	TRINITY_DN32805_c0_g1_i2	1918	1691.92	499.93	19.79	25.91	100
Venom_prothrombin_activator_pseutarin-C_catalytic_subunit_12	Echis_coloratus_Skin1	TRINITY_DN22847_c0_g1_i2	1674	1447.92	352.28	16.29	21.34	100
Alpha-latroinsectotoxin-Lt1a_2	Echis_coloratus_Skin1	TRINITY_DN35070_c0_g1_i2	5937	5710.92	1233.13	14.46	18.94	100
Alpha-latroinsectotoxin-Lt1a_2	Echis_coloratus_Skin1	TRINITY_DN34832_c0_g2_i2	3215	2988.92	594	13.31	17.43	100
Alpha-latroinsectotoxin-Lt1a_2	Echis_coloratus_Skin1	TRINITY_DN26828_c0_g1_i2	4069	3842.92	715.86	12.48	16.34	100
Factor_V_activator_RVV-V_gamma_142	Echis_coloratus_Skin1	TRINITY_DN60754_c0_g1_i1	2211	1984.92	312	10.53	13.78	100
Alpha-latroinsectotoxin-Lt1a_2	Echis_coloratus_Skin1	TRINITY_DN26828_c0_g1_i1	4068	3841.92	584.14	10.18	13.33	100
Alpha-latroinsectotoxin-Lt1a_2	Echis_coloratus_Skin1	TRINITY_DN22029_c0_g1_i1	3586	3359.92	506.93	10.1	13.23	100
Factor_V_activator_RVV-V_gamma_142	Echis_coloratus_Skin1	TRINITY_DN31187_c0_g1_i3	1171	944.92	139.04	9.86	12.9	100
Alpha-latroinsectotoxin-Lt1a_2	Echis_coloratus_Skin1	TRINITY_DN34268_c0_g1_i4	3830	3603.92	464.62	8.63	11.31	100
Factor_V_activator_RVV-V_gamma_142	Echis_coloratus_Skin1	TRINITY_DN22892_c0_g2_i1	2476	2249.92	270.68	8.06	10.55	100
Factor_V_activator_RVV-V_gamma_142	Echis_coloratus_Skin1	TRINITY_DN23935_c0_g1_i1	4177	3950.92	474	8.03	10.52	100
Alpha-latroinsectotoxin-Lt1a_2	Echis_coloratus_Skin1	TRINITY_DN33337_c1_g1_i1	5981	5754.92	599.11	6.97	9.13	100
Alpha-latroinsectotoxin-Lt1a_2	Echis_coloratus_Skin1	TRINITY_DN27197_c0_g2_i2	3416	3189.92	319.27	6.7	8.78	100
Alpha-latroinsectotoxin-Lt1a_2	Echis_coloratus_Skin1	TRINITY_DN30840_c0_g1_i2	7428	7201.92	640.96	5.96	7.8	100
Factor_V_activator_RVV-V_gamma_142	Echis_coloratus_Skin1	TRINITY_DN37932_c0_g1_i1	2070	1843.92	158	5.74	7.51	100
Alpha-latroinsectotoxin-Lt1a_2	Echis_coloratus_Skin1	TRINITY_DN33337_c1_g1_i2	6184	5957.92	486.89	5.47	7.17	100
Alpha-latroinsectotoxin-Lt1a_2	Echis_coloratus_Skin1	TRINITY_DN4897_c0_g1_i1	2290	2063.92	163.91	5.32	6.96	100
Delta-latroinsectotoxin-Lt1a_1	Echis_coloratus_Skin1	TRINITY_DN34181_c5_g2_i9	3905	3678.92	288.55	5.25	6.88	100
Zinc_metalloproteinase@disintegrin_107	Echis_coloratus_Skin1	TRINITY_DN22009_c0_g1_i1	7337	7110.92	552	5.2	6.81	100
Alpha-latroinsectotoxin-Lt1a_2	Echis_coloratus_Skin1	TRINITY_DN26150_c0_g2_i2	3268	3041.92	235.7	5.19	6.79	100
Factor_V_activator_RVV-V_gamma_142	Echis_coloratus_Skin1	TRINITY_DN16858_c0_g2_i1	1006	779.92	57.45	4.93	6.46	100
Vespryn_2	Echis_coloratus_Skin1	TRINITY_DN34231_c0_g4_i2	1897	1670.92	122.24	4.9	6.42	100
KappaPI-theraphotoxin-Hs1a_80	Echis_coloratus_Skin1	TRINITY_DN60613_c0_g1_i1	308	81.95	6	4.9	6.42	100
KappaPI-theraphotoxin-Hs1a_80	Echis_coloratus_Skin1	TRINITY_DN17218_c0_g3_i1	1757	1530.92	108	4.72	6.19	100
KappaPI-theraphotoxin-Hs1a_80	Echis_coloratus_Skin1	TRINITY_DN34243_c0_g1_i7	1401	1174.92	82.22	4.69	6.14	100
Factor_V_activator_RVV-V_gamma_142	Echis_coloratus_Skin1	TRINITY_DN35401_c0_g1_i5	2004	1777.92	123.69	4.66	6.1	100
Hyaluronidase_1	Echis_coloratus_Skin1	TRINITY_DN3704_c0_g1_i1	715	488.92	34	4.66	6.1	100
Vespryn_2	Echis_coloratus_Skin1	TRINITY_DN31083_c0_g1_i1	1700	1473.92	98	4.45	5.83	100
Alpha-latroinsectotoxin-Lt1a_2	Echis_coloratus_Skin1	TRINITY_DN30530_c0_g1_i1	1931	1704.92	108	4.24	5.56	100
Neprilysin-1_1	Echis_coloratus_Skin1	TRINITY_DN26877_c0_g1_i1	2700	2473.92	154	4.17	5.46	100
Acetylcholinesterase-1_1	Echis_coloratus_Skin1	TRINITY_DN14325_c0_g1_i1	3001	2774.92	172	4.15	5.44	100
Alpha-latroinsectotoxin-Lt1a_2	Echis_coloratus_Skin1	TRINITY_DN34198_c0_g1_i1	1077	850.92	52.11	4.1	5.37	100
Alpha-latroinsectotoxin-Lt1a_2	Echis_coloratus_Skin1	TRINITY_DN22087_c0_g1_i1	4471	4244.92	235.88	3.72	4.87	100
Kunitz-type_conkunitzin-S1_2	Echis_coloratus_Skin1	TRINITY_DN33022_c0_g1_i1	3786	3559.92	190	3.57	4.68	100
C-type_lectin_6	Echis_coloratus_Skin1	TRINITY_DN30937_c0_g1_i1	1632	1405.92	68	3.24	4.24	100
Alpha-latroinsectotoxin-Lt1a_2	Echis_coloratus_Skin1	TRINITY_DN35254_c1_g1_i3	3911	3684.92	175.56	3.19	4.18	100
Alpha-latroinsectotoxin-Lh1a_1	Echis_coloratus_Skin1	TRINITY_DN35390_c1_g1_i1	5441	5214.92	243.81	3.13	4.1	100
Alpha-latroinsectotoxin-Lt1a_2	Echis_coloratus_Skin1	TRINITY_DN35254_c1_g1_i1	4115	3888.92	152.44	2.63	3.44	100
Vespryn_2	Echis_coloratus_Skin1	TRINITY_DN18806_c0_g1_i1	1107	880.92	28	2.13	2.79	100
Venom_prothrombin_activator_pseutarin-C_catalytic_subunit_12	Echis_coloratus_Skin1	TRINITY_DN21907_c0_g1_i2	2472	2245.92	70.15	2.09	2.74	100
Alpha-latroinsectotoxin-Lt1a_2	Echis_coloratus_Skin1	TRINITY_DN32320_c0_g1_i1	2062	1835.92	56	2.04	2.67	100
Phospholipase_A1_19	Echis_coloratus_Skin1	TRINITY_DN13742_c0_g1_i1	1922	1695.92	50	1.97	2.59	100
Alpha-latroinsectotoxin-Lt1a_2	Echis_coloratus_Skin1	TRINITY_DN53587_c0_g1_i1	450	223.93	6	1.79	2.35	100
Cysteine-rich_venom_protein_Mr30_2	Echis_coloratus_Skin1	TRINITY_DN11386_c0_g2_i1	983	756.92	20	1.77	2.32	100
Factor_V_activator_RVV-V_gamma_142	Echis_coloratus_Skin1	TRINITY_DN15291_c0_g1_i1	897	670.92	17.77	1.77	2.32	100
Factor_V_activator_RVV-V_gamma_142	Echis_coloratus_Skin1	TRINITY_DN22892_c0_g1_i1	2479	2252.92	59.32	1.76	2.31	100
KappaPI-theraphotoxin-Hs1a_80	Echis_coloratus_Skin1	TRINITY_DN34243_c0_g1_i3	2682	2455.92	63.64	1.74	2.27	100
Alpha-latroinsectotoxin-Lt1a_2	Echis_coloratus_Skin1	TRINITY_DN33374_c0_g1_i3	4674	4447.92	114.68	1.73	2.26	100
Alpha-latroinsectotoxin-Lt1a_2	Echis_coloratus_Skin1	TRINITY_DN29416_c0_g1_i2	4157	3930.92	100.31	1.71	2.24	100
Snake_venom_vascular_endothelial_growth_factor_toxin_VR-1_1	Echis_coloratus_Skin1	TRINITY_DN29184_c0_g1_i7	3141	2914.92	72.7	1.67	2.19	100
Alpha-latroinsectotoxin-Lt1a_2	Echis_coloratus_Skin1	TRINITY_DN80214_c0_g1_i1	884	657.92	16	1.63	2.13	100
Acetylcholinesterase-1_1	Echis_coloratus_Skin1	TRINITY_DN49200_c0_g1_i1	731	504.92	12	1.59	2.08	100
Alpha-latroinsectotoxin-Lt1a_2	Echis_coloratus_Skin1	TRINITY_DN96757_c0_g1_i1	485	258.93	6	1.55	2.03	100
Alpha-latroinsectotoxin-Lt1a_2	Echis_coloratus_Skin1	TRINITY_DN31511_c0_g2_i4	8334	8107.92	173.72	1.43	1.88	100
Factor_V_activator_RVV-V_gamma_142	Echis_coloratus_Skin1	TRINITY_DN20457_c0_g2_i1	807	580.92	12.37	1.43	1.87	100
Thrombin-like_enzyme_TLBm_1	Echis_coloratus_Skin1	TRINITY_DN15291_c0_g2_i1	436	209.93	4.23	1.35	1.77	100
Alpha-latroinsectotoxin-Lt1a_2	Echis_coloratus_Skin1	TRINITY_DN6252_c0_g1_i1	529	302.93	6	1.33	1.74	100
Alpha-latroinsectotoxin-Lt1a_2	Echis_coloratus_Skin1	TRINITY_DN106579_c0_g1_i1	960	733.92	14	1.28	1.67	100
Alpha-latroinsectotoxin-Lt1a_2	Echis_coloratus_Skin1	TRINITY_DN47133_c0_g1_i1	1081	854.92	16	1.25	1.64	100
Delta-latroinsectotoxin-Lt1a_1	Echis_coloratus_Skin1	TRINITY_DN62322_c0_g1_i1	444	217.93	4	1.23	1.61	100
Phospholipase_A2_1	Echis_coloratus_Skin1	TRINITY_DN5710_c0_g1_i1	796	569.92	10	1.18	1.54	100
Alpha-latroinsectotoxin-Lt1a_2	Echis_coloratus_Skin1	TRINITY_DN107580_c0_g1_i1	580	353.92	6	1.14	1.49	100
Disintegrin_acostatin-alpha_26	Echis_coloratus_Skin1	TRINITY_DN33771_c2_g1_i4	3279	3052.92	48	1.05	1.38	100
Alpha-latroinsectotoxin-Lt1a_2	Echis_coloratus_Skin1	TRINITY_DN34658_c0_g1_i2	3987	3760.92	56.93	1.01	1.33	100
Alpha-latroinsectotoxin-Lt1a_2	Echis_coloratus_Skin1	TRINITY_DN4897_c0_g2_i1	2287	2060.92	30.09	0.98	1.28	100
Alpha-latroinsectotoxin-Lt1a_2	Echis_coloratus_Skin1	TRINITY_DN66262_c0_g1_i1	518	291.93	4	0.92	1.2	100
L-amino-acid_oxidase_31	Echis_coloratus_Skin1	TRINITY_DN35719_c1_g1_i1	1566	1339.92	16.16	0.81	1.06	100
Alpha-latroinsectotoxin-Lt1a_2	Echis_coloratus_Skin1	TRINITY_DN29554_c0_g1_i9	6804	6577.92	72	0.73	0.96	100
Disintegrin_bitistatin_6	Echis_coloratus_Skin1	TRINITY_DN34649_c0_g2_i2	4074	3847.92	42.25	0.74	0.96	100
Alpha-latroinsectotoxin-Lt1a_2	Echis_coloratus_Skin1	TRINITY_DN30119_c0_g1_i2	1014	787.92	8	0.68	0.89	100
Vespryn_2	Echis_coloratus_Skin1	TRINITY_DN34231_c0_g4_i1	1405	1178.92	11.76	0.67	0.87	100
Alpha-latroinsectotoxin-Lt1a_2	Echis_coloratus_Skin1	TRINITY_DN26306_c0_g1_i1	2112	1885.92	18	0.64	0.84	100
Astacin-like_metalloprotease_toxin_1_1	Echis_coloratus_Skin1	TRINITY_DN33557_c0_g1_i2	3568	3341.92	29.79	0.6	0.78	100
Alpha-latroinsectotoxin-Lt1a_2	Echis_coloratus_Skin1	TRINITY_DN31511_c0_g2_i6	8349	8122.92	68.61	0.57	0.74	100
Delta-latroinsectotoxin-Lt1a_1	Echis_coloratus_Skin1	TRINITY_DN32956_c0_g1_i2	3319	3092.92	25.44	0.55	0.72	100
Neprilysin-1_1	Echis_coloratus_Skin1	TRINITY_DN36989_c0_g1_i1	717	490.92	4	0.55	0.71	100
Delta-latroinsectotoxin-Lt1a_1	Echis_coloratus_Skin1	TRINITY_DN8532_c0_g1_i1	1543	1316.92	10	0.51	0.67	100
Venom_prothrombin_activator_pseutarin-C_catalytic_subunit_12	Echis_coloratus_Skin1	TRINITY_DN28486_c0_g1_i8	793	566.92	3.9	0.46	0.6	100
Alpha-latroinsectotoxin-Lt1a_2	Echis_coloratus_Skin1	TRINITY_DN25164_c0_g1_i4	5505	5278.92	31.99	0.41	0.53	100
Alpha-latroinsectotoxin-Lh1a_1	Echis_coloratus_Skin1	TRINITY_DN35390_c1_g1_i2	3262	3035.92	15.91	0.35	0.46	100
Acidic_phospholipase_A2_1_322	Echis_coloratus_Skin1	TRINITY_DN27355_c0_g1_i2	780	553.92	2.76	0.33	0.44	100
Cysteine-rich_venom_protein_Mr30_2	Echis_coloratus_Skin1	TRINITY_DN91933_c0_g1_i1	635	408.92	2	0.33	0.43	100
Disintegrin_bitistatin_6	Echis_coloratus_Skin1	TRINITY_DN34341_c0_g1_i4	4468	4241.92	12.48	0.2	0.26	100
Techylectin-like_protein_1	Echis_coloratus_Skin1	TRINITY_DN20952_c0_g1_i2	643	416.92	1.07	0.17	0.22	100
Alpha-latroinsectotoxin-Lt1a_2	Echis_coloratus_Skin1	TRINITY_DN24907_c0_g1_i1	2061	1834.92	3.21	0.12	0.15	100
C-type_lectin_6	Echis_coloratus_Venom_gland1	TRINITY_DN44495_c0_g1_i1	760	511.26	40358	3383.81	3604.49	100								C-type lectin	0
Cysteine-rich_venom_protein_25-A_6	Echis_coloratus_Venom_gland1	TRINITY_DN21521_c0_g2_i1	1123	874.26	16746.1	821.09	874.64	100								Disintegrin	0
Acidic_phospholipase_A2_1_322	Echis_coloratus_Venom_gland1	TRINITY_DN35066_c0_g1_i1	699	450.26	7799	742.49	790.92	100								Peptidase S1	0
Disintegrin_acostatin-alpha_26	Echis_coloratus_Venom_gland1	TRINITY_DN34505_c7_g1_i2	1071	822.26	10802.6	563.17	599.9	100								Latrotoxin	0
C-type_lectin_6	Echis_coloratus_Venom_gland1	TRINITY_DN11827_c0_g1_i1	310	61.54	752	523.86	558.02	100								SVMP	0
Disintegrin_acostatin-alpha_26	Echis_coloratus_Venom_gland1	TRINITY_DN34505_c7_g1_i4	618	369.26	4464.79	518.3	552.11	100								BPTI/Kunitz inhibitor	0
Disintegrin_acostatin-alpha_26	Echis_coloratus_Venom_gland1	TRINITY_DN35594_c0_g2_i8	1137	888.26	10302.7	497.2	529.62	100								Other	0
C-type_lectin_6	Echis_coloratus_Venom_gland1	TRINITY_DN35223_c5_g6_i7	664	415.26	4693	484.45	516.04	100								PLA2	0
Alpha-latroinsectotoxin-Lt1a_2	Echis_coloratus_Venom_gland1	TRINITY_DN60203_c0_g1_i1	2798	2549.26	25364	426.5	454.32	100								Vespryn	0
Disintegrin_acostatin-alpha_26	Echis_coloratus_Venom_gland1	TRINITY_DN35594_c0_g2_i5	1511	1262.26	11827.7	401.67	427.87	100								Peroxiredoxin	0
C-type_lectin_6	Echis_coloratus_Venom_gland1	TRINITY_DN35223_c5_g3_i6	579	330.26	3027.48	392.95	418.58	100								CRISP	0
Cystatin-1_1	Echis_coloratus_Venom_gland1	TRINITY_DN22914_c0_g1_i1	767	518.26	4300	355.66	378.86	100								VEGF	0
Cysteine-rich_venom_protein_asurin-1_1	Echis_coloratus_Venom_gland1	TRINITY_DN21521_c0_g1_i1	1493	1244.26	10207.9	351.68	374.61	100								Dnase II	0
Disintegrin_acostatin-alpha_26	Echis_coloratus_Venom_gland1	TRINITY_DN35594_c0_g2_i2	1493	1244.26	9075.39	312.66	333.05	100
Factor_V_activator_RVV-V_gamma_142	Echis_coloratus_Venom_gland1	TRINITY_DN34184_c5_g1_i2	1715	1466.26	9603.63	280.76	299.08	100
C-type_lectin_6	Echis_coloratus_Venom_gland1	TRINITY_DN35223_c5_g9_i1	1051	802.26	5104.48	272.74	290.53	100
Disintegrin_acostatin-alpha_26	Echis_coloratus_Venom_gland1	TRINITY_DN35594_c0_g5_i13	280	33.84	213.32	270.26	287.88	100
Alpha-latroinsectotoxin-Lt1a_2	Echis_coloratus_Venom_gland1	TRINITY_DN28297_c0_g1_i1	1442	1193.26	7461	268.03	285.51	100
Peroxiredoxin-4_1	Echis_coloratus_Venom_gland1	TRINITY_DN13051_c0_g1_i1	1041	792.26	4889	264.53	281.78	100
Alpha-latroinsectotoxin-Lt1a_2	Echis_coloratus_Venom_gland1	TRINITY_DN31342_c0_g1_i1	2108	1859.26	10797.8	248.95	265.19	100
C-type_lectin_6	Echis_coloratus_Venom_gland1	TRINITY_DN35223_c5_g3_i4	579	330.26	1741.1	225.99	240.72	100
C-type_lectin_6	Echis_coloratus_Venom_gland1	TRINITY_DN28516_c0_g1_i3	805	556.26	2881.16	222.03	236.51	100
Disintegrin_acostatin-alpha_26	Echis_coloratus_Venom_gland1	TRINITY_DN35594_c0_g2_i17	1216	967.26	4980.74	220.73	235.13	100
C-type_lectin_6	Echis_coloratus_Venom_gland1	TRINITY_DN35223_c5_g3_i3	705	456.26	2131.66	200.27	213.34	100
C-type_lectin_6	Echis_coloratus_Venom_gland1	TRINITY_DN35223_c5_g9_i2	744	495.26	2210.52	191.33	203.81	100
C-type_lectin_6	Echis_coloratus_Venom_gland1	TRINITY_DN78786_c0_g1_i1	490	241.27	1013	179.98	191.72	100
C-type_lectin_6	Echis_coloratus_Venom_gland1	TRINITY_DN35223_c5_g3_i1	698	449.26	1873.23	178.74	190.39	100
Snake_venom_vascular_endothelial_growth_factor_toxin_VR-1_1	Echis_coloratus_Venom_gland1	TRINITY_DN14183_c0_g1_i1	1284	1035.26	4295.82	177.87	189.48	100
Disintegrin_acostatin-alpha_26	Echis_coloratus_Venom_gland1	TRINITY_DN35594_c0_g5_i6	490	241.27	883.03	156.89	167.12	100
C-type_lectin_6	Echis_coloratus_Venom_gland1	TRINITY_DN62391_c0_g1_i1	479	230.27	791	147.25	156.85	100
Zinc_metalloproteinase@disintegrin_107	Echis_coloratus_Venom_gland1	TRINITY_DN608_c0_g1_i1	321	72.38	239.13	141.63	150.87	100
C-type_lectin_6	Echis_coloratus_Venom_gland1	TRINITY_DN35223_c5_g3_i5	741	492.26	1598.34	139.18	148.26	100
C-type_lectin_6	Echis_coloratus_Venom_gland1	TRINITY_DN28516_c0_g1_i2	983	734.26	2314.56	135.13	143.94	100
Techylectin-like_protein_1	Echis_coloratus_Venom_gland1	TRINITY_DN21949_c0_g1_i1	1312	1063.26	3257	131.31	139.87	100
C-type_lectin_mannose-binding_isoform_30	Echis_coloratus_Venom_gland1	TRINITY_DN24748_c0_g1_i1	486	237.27	678	122.49	130.48	100
Disintegrin_bitistatin_6	Echis_coloratus_Venom_gland1	TRINITY_DN34505_c7_g6_i1	573	324.26	900	118.98	126.74	100
Venom_prothrombin_activator_pseutarin-C_catalytic_subunit_12	Echis_coloratus_Venom_gland1	TRINITY_DN21991_c1_g1_i1	2533	2284.26	6249	117.27	124.92	100
Factor_V_activator_RVV-V_gamma_142	Echis_coloratus_Venom_gland1	TRINITY_DN34184_c5_g1_i1	1138	889.26	2289.91	110.38	117.58	100
C-type_lectin_6	Echis_coloratus_Venom_gland1	TRINITY_DN20074_c0_g1_i1	956	707.26	1705	103.34	110.08	100
Disintegrin-like_leberagin-C_8	Echis_coloratus_Venom_gland1	TRINITY_DN34505_c7_g1_i3	874	625.26	1413.58	96.91	103.23	100
C-type_lectin_6	Echis_coloratus_Venom_gland1	TRINITY_DN2422_c0_g1_i1	491	242.27	536	94.84	101.02	100
Kunitz-type_serine_protease_inhibitor_bitisilin-3_1	Echis_coloratus_Venom_gland1	TRINITY_DN27595_c0_g1_i1	855	606.26	1312	92.77	98.82	100
Disintegrin_acostatin-alpha_26	Echis_coloratus_Venom_gland1	TRINITY_DN35594_c0_g2_i12	1118	869.26	1773.54	87.46	93.16	100
Disintegrin_acostatin-alpha_26	Echis_coloratus_Venom_gland1	TRINITY_DN35594_c0_g5_i11	538	289.27	561.22	83.17	88.59	100
C-type_lectin_6	Echis_coloratus_Venom_gland1	TRINITY_DN49677_c0_g1_i1	608	359.26	687	81.97	87.32	100
C-type_lectin_6	Echis_coloratus_Venom_gland1	TRINITY_DN35223_c5_g6_i9	670	421.26	805.07	81.92	87.27	100
Disintegrin_acostatin-alpha_26	Echis_coloratus_Venom_gland1	TRINITY_DN35594_c0_g5_i1	316	67.43	120.87	76.84	81.85	100
Zinc_metalloproteinase@disintegrin_107	Echis_coloratus_Venom_gland1	TRINITY_DN62713_c0_g1_i1	339	90.31	154	73.1	77.87	100
C-type_lectin_6	Echis_coloratus_Venom_gland1	TRINITY_DN23923_c0_g1_i1	534	285.27	479.32	72.03	76.72	100
Peroxiredoxin-4_1	Echis_coloratus_Venom_gland1	TRINITY_DN46201_c0_g1_i1	1111	862.26	1371	68.16	72.6	100
Factor_V_activator_RVV-V_gamma_142	Echis_coloratus_Venom_gland1	TRINITY_DN34184_c5_g1_i3	1176	927.26	1367.49	63.22	67.34	100
Factor_V_activator_RVV-V_gamma_142	Echis_coloratus_Venom_gland1	TRINITY_DN13321_c0_g1_i1	1211	962.26	1402	62.46	66.53	100
Zinc_metalloproteinase@disintegrin_107	Echis_coloratus_Venom_gland1	TRINITY_DN77335_c0_g1_i1	451	202.27	286	60.61	64.56	100
Acidic_phospholipase_A2_1_322	Echis_coloratus_Venom_gland1	TRINITY_DN35066_c0_g1_i2	1874	1625.26	2297	60.58	64.53	100
Zinc_metalloproteinase@disintegrin_107	Echis_coloratus_Venom_gland1	TRINITY_DN35594_c0_g2_i7	773	524.26	740.23	60.53	64.47	100
Alpha-latroinsectotoxin-Lt1a_2	Echis_coloratus_Venom_gland1	TRINITY_DN25373_c0_g1_i1	1631	1382.26	1882	58.36	62.17	100
Techylectin-like_protein_1	Echis_coloratus_Venom_gland1	TRINITY_DN82380_c0_g1_i1	521	272.27	366	57.62	61.38	100
Disintegrin_acostatin-alpha_26	Echis_coloratus_Venom_gland1	TRINITY_DN35594_c0_g2_i11	1496	1247.26	1646.51	56.59	60.28	100
Disintegrin_bitistatin_6	Echis_coloratus_Venom_gland1	TRINITY_DN27053_c0_g2_i3	434	185.28	234.38	54.23	57.76	100
L-amino-acid_oxidase_1	Echis_coloratus_Venom_gland1	TRINITY_DN30646_c0_g1_i1	2822	2573.26	2863.5	47.7	50.81	100
C-type_lectin_6	Echis_coloratus_Venom_gland1	TRINITY_DN35223_c5_g6_i10	501	252.27	270.14	45.9	48.9	100
Plancitoxin-1_1	Echis_coloratus_Venom_gland1	TRINITY_DN32796_c2_g1_i9	2119	1870.26	1832.27	42	44.73	100
Disintegrin_bitistatin_6	Echis_coloratus_Venom_gland1	TRINITY_DN35594_c0_g2_i15	358	109.3	106	41.57	44.29	100
Galactose-specific_lectin_nattectin_1	Echis_coloratus_Venom_gland1	TRINITY_DN29511_c0_g1_i1	1459	1210.26	1173	41.55	44.26	100
Disintegrin_acostatin-alpha_26	Echis_coloratus_Venom_gland1	TRINITY_DN35594_c0_g2_i13	1018	769.26	735.64	40.99	43.67	100
C-type_lectin_mannose-binding_isoform_30	Echis_coloratus_Venom_gland1	TRINITY_DN29911_c0_g1_i1	1141	892.26	827	39.73	42.32	100
Nawaprin_1	Echis_coloratus_Venom_gland1	TRINITY_DN30176_c0_g1_i2	2050	1801.26	1633.41	38.87	41.41	100
C-type_lectin_mannose-binding_isoform_30	Echis_coloratus_Venom_gland1	TRINITY_DN2781_c0_g1_i1	724	475.26	414	37.34	39.78	100
C-type_lectin_6	Echis_coloratus_Venom_gland1	TRINITY_DN17019_c0_g1_i1	351	102.3	86	36.04	38.39	100
C-type_lectin_mannose-binding_isoform_30	Echis_coloratus_Venom_gland1	TRINITY_DN35223_c5_g7_i1	485	236.27	182	33.02	35.17	100
Disintegrin_acostatin-alpha_26	Echis_coloratus_Venom_gland1	TRINITY_DN35594_c0_g2_i9	578	329.26	252.13	32.82	34.97	100
KappaPI-theraphotoxin-Hs1a_80	Echis_coloratus_Venom_gland1	TRINITY_DN25142_c0_g1_i1	956	707.26	534	32.37	34.48	100
Galactose-specific_lectin_nattectin_1	Echis_coloratus_Venom_gland1	TRINITY_DN30907_c0_g1_i1	1406	1157.26	861	31.89	33.97	100
Disintegrin_acostatin-alpha_26	Echis_coloratus_Venom_gland1	TRINITY_DN35594_c0_g2_i18	1061	812.26	583.38	30.79	32.8	100
C-type_lectin_6	Echis_coloratus_Venom_gland1	TRINITY_DN23923_c0_g1_i2	534	285.27	201.68	30.31	32.28	100
C-type_lectin_6	Echis_coloratus_Venom_gland1	TRINITY_DN35223_c5_g6_i4	666	417.26	276.93	28.45	30.3	100
Disintegrin_acostatin-alpha_26	Echis_coloratus_Venom_gland1	TRINITY_DN35594_c0_g2_i3	1011	762.26	490.83	27.6	29.4	100
Vespryn_2	Echis_coloratus_Venom_gland1	TRINITY_DN33481_c6_g3_i1	2841	2592.26	1642.86	27.17	28.94	100
Alpha-latroinsectotoxin-Lt1a_2	Echis_coloratus_Venom_gland1	TRINITY_DN90166_c0_g1_i1	2846	2597.26	1575	25.99	27.69	100
C-type_lectin_6	Echis_coloratus_Venom_gland1	TRINITY_DN22312_c0_g1_i1	710	461.26	272	25.28	26.93	100
Disintegrin-like_leberagin-C_8	Echis_coloratus_Venom_gland1	TRINITY_DN34505_c6_g1_i1	444	195.28	111	24.37	25.96	100
Factor_V_activator_RVV-V_gamma_142	Echis_coloratus_Venom_gland1	TRINITY_DN34184_c5_g1_i4	6106	5857.26	3207.98	23.48	25.01	100
Disintegrin_acostatin-alpha_26	Echis_coloratus_Venom_gland1	TRINITY_DN35594_c0_g5_i7	324	75.35	40	22.75	24.24	100
KappaPI-theraphotoxin-Hs1a_80	Echis_coloratus_Venom_gland1	TRINITY_DN18866_c0_g3_i3	850	601.26	287.03	20.46	21.8	100
C-type_lectin_6	Echis_coloratus_Venom_gland1	TRINITY_DN23539_c0_g1_i1	3905	3656.26	1687	19.78	21.07	100
Disintegrin_acostatin-alpha_26	Echis_coloratus_Venom_gland1	TRINITY_DN35594_c0_g2_i14	786	537.26	241.63	19.28	20.54	100
Venom_prothrombin_activator_pseutarin-C_catalytic_subunit_12	Echis_coloratus_Venom_gland1	TRINITY_DN33296_c0_g1_i1	3533	3284.26	1437	18.76	19.98	100
Disintegrin_bitistatin_6	Echis_coloratus_Venom_gland1	TRINITY_DN34505_c6_g4_i1	526	277.27	114	17.62	18.77	100
Venom_prothrombin_activator_pseutarin-C_catalytic_subunit_12	Echis_coloratus_Venom_gland1	TRINITY_DN21907_c0_g1_i1	2471	2222.26	911.8	17.59	18.74	100
Alpha-latroinsectotoxin-Lt1a_2	Echis_coloratus_Venom_gland1	TRINITY_DN27633_c0_g1_i1	1486	1237.26	493	17.08	18.19	100
Vespryn_2	Echis_coloratus_Venom_gland1	TRINITY_DN35454_c3_g8_i4	2652	2403.26	938.87	16.75	17.84	100
Alpha-latroinsectotoxin-Lt1a_2	Echis_coloratus_Venom_gland1	TRINITY_DN24041_c0_g1_i1	1744	1495.26	582	16.68	17.77	100
C-type_lectin_6	Echis_coloratus_Venom_gland1	TRINITY_DN35223_c5_g3_i2	702	453.26	174.19	16.47	17.55	100
Factor_V_activator_RVV-V_gamma_142	Echis_coloratus_Venom_gland1	TRINITY_DN95282_c0_g1_i1	416	167.28	64	16.4	17.47	100
Acidic_phospholipase_A2_1_322	Echis_coloratus_Venom_gland1	TRINITY_DN18326_c0_g1_i1	487	238.27	75.72	13.62	14.51	100
Factor_V_activator_RVV-V_gamma_142	Echis_coloratus_Venom_gland1	TRINITY_DN17220_c0_g2_i1	363	114.29	35	13.13	13.98	100
Zinc_metalloproteinase@disintegrin_107	Echis_coloratus_Venom_gland1	TRINITY_DN27053_c0_g1_i1	313	64.48	18	11.97	12.75	100
C-type_lectin_6	Echis_coloratus_Venom_gland1	TRINITY_DN28516_c0_g1_i4	957	708.26	197.82	11.97	12.75	100
Glutaminyl-peptide_cyclotransferase_1	Echis_coloratus_Venom_gland1	TRINITY_DN77170_c0_g1_i1	1628	1379.26	358	11.13	11.85	100
Alpha-latroinsectotoxin-Lt1a_2	Echis_coloratus_Venom_gland1	TRINITY_DN32065_c0_g1_i2	1060	811.26	206.75	10.92	11.64	100
Alpha-latroinsectotoxin-Lt1a_2	Echis_coloratus_Venom_gland1	TRINITY_DN34633_c4_g1_i2	3752	3503.26	849.52	10.39	11.07	100
C-type_lectin_mannose-binding_isoform_30	Echis_coloratus_Venom_gland1	TRINITY_DN34768_c7_g1_i3	1317	1068.26	255.14	10.24	10.91	100
Alpha-latroinsectotoxin-Lt1a_2	Echis_coloratus_Venom_gland1	TRINITY_DN34658_c0_g1_i7	2809	2560.26	611.41	10.24	10.9	100
Kunitz-type_serine_protease_inhibitor_2_4	Echis_coloratus_Venom_gland1	TRINITY_DN15846_c0_g1_i1	529	280.27	64	9.79	10.43	100
Factor_V_activator_RVV-V_gamma_142	Echis_coloratus_Venom_gland1	TRINITY_DN35401_c0_g1_i3	1583	1334.26	300.02	9.64	10.27	100
Zinc_metalloproteinase@disintegrin_107	Echis_coloratus_Venom_gland1	TRINITY_DN608_c0_g2_i1	321	72.38	15.87	9.4	10.01	100
Factor_V_activator_RVV-V_gamma_142	Echis_coloratus_Venom_gland1	TRINITY_DN30853_c0_g1_i1	3294	3045.26	624	8.78	9.36	100
Factor_V_activator_RVV-V_gamma_142	Echis_coloratus_Venom_gland1	TRINITY_DN17220_c0_g1_i1	366	117.29	23	8.41	8.95	100
Delta-latroinsectotoxin-Lt1a_1	Echis_coloratus_Venom_gland1	TRINITY_DN30971_c0_g2_i1	1387	1138.26	213.94	8.06	8.58	100
Putative_protein-glutamate_O-methyltransferase_1	Echis_coloratus_Venom_gland1	TRINITY_DN5271_c0_g1_i1	1866	1617.26	289.41	7.67	8.17	100
C-type_lectin_6	Echis_coloratus_Venom_gland1	TRINITY_DN17019_c0_g1_i2	412	163.28	29	7.61	8.11	100
Disintegrin_bitistatin_6	Echis_coloratus_Venom_gland1	TRINITY_DN98431_c0_g1_i1	312	63.49	11	7.43	7.91	100
Plancitoxin-1_1	Echis_coloratus_Venom_gland1	TRINITY_DN32796_c2_g1_i7	653	404.26	68.11	7.22	7.69	100
Zinc_metalloproteinase@disintegrin_107	Echis_coloratus_Venom_gland1	TRINITY_DN35594_c0_g3_i1	427	178.28	29	6.97	7.43	100
C-type_lectin_6	Echis_coloratus_Venom_gland1	TRINITY_DN15430_c0_g1_i1	600	351.26	57	6.96	7.41	100
KappaPI-theraphotoxin-Hs1a_80	Echis_coloratus_Venom_gland1	TRINITY_DN30687_c0_g1_i1	6563	6314.26	1024.77	6.96	7.41	100
Acetylcholinesterase-1_1	Echis_coloratus_Venom_gland1	TRINITY_DN27447_c0_g1_i2	2201	1952.26	312.7	6.87	7.31	100
C-type_lectin_mannose-binding_isoform_30	Echis_coloratus_Venom_gland1	TRINITY_DN25368_c0_g1_i2	995	746.26	113.64	6.53	6.95	100
Hyaluronidase_1	Echis_coloratus_Venom_gland1	TRINITY_DN33354_c2_g3_i4	1831	1582.26	229.79	6.23	6.63	100
C-type_lectin_6	Echis_coloratus_Venom_gland1	TRINITY_DN22814_c0_g1_i1	566	317.27	45	6.08	6.48	100
Glutaminyl-peptide_cyclotransferase_1	Echis_coloratus_Venom_gland1	TRINITY_DN29928_c0_g1_i1	1545	1296.26	184	6.08	6.48	100
C-type_lectin_mannose-binding_isoform_30	Echis_coloratus_Venom_gland1	TRINITY_DN34768_c7_g1_i1	1583	1334.26	180.41	5.8	6.17	100
Factor_V_activator_RVV-V_gamma_142	Echis_coloratus_Venom_gland1	TRINITY_DN19615_c1_g1_i1	317	68.42	9	5.64	6.01	100
C-type_lectin_6	Echis_coloratus_Venom_gland1	TRINITY_DN11994_c0_g1_i1	1112	863.26	112.19	5.57	5.93	100
Acetylcholinesterase-1_1	Echis_coloratus_Venom_gland1	TRINITY_DN19210_c0_g1_i1	1294	1045.26	134	5.5	5.85	100
C-type_lectin_mannose-binding_isoform_30	Echis_coloratus_Venom_gland1	TRINITY_DN35223_c5_g6_i8	422	173.28	20.36	5.04	5.37	100
KappaPI-theraphotoxin-Hs1a_80	Echis_coloratus_Venom_gland1	TRINITY_DN34243_c0_g1_i4	1417	1168.26	127.97	4.7	5	100
Venom_prothrombin_activator_pseutarin-C_catalytic_subunit_12	Echis_coloratus_Venom_gland1	TRINITY_DN22847_c0_g1_i1	1590	1341.26	143.99	4.6	4.9	100
Alpha-latroinsectotoxin-Lt1a_2	Echis_coloratus_Venom_gland1	TRINITY_DN32614_c0_g2_i1	3837	3588.26	364	4.35	4.63	100
Disintegrin_bitistatin_6	Echis_coloratus_Venom_gland1	TRINITY_DN27053_c0_g2_i1	768	519.26	51.56	4.26	4.53	100
Hyaluronidase_CdtHya1_1	Echis_coloratus_Venom_gland1	TRINITY_DN33354_c2_g3_i3	1066	817.26	77.45	4.06	4.33	100
C-type_lectin_mannose-binding_isoform_30	Echis_coloratus_Venom_gland1	TRINITY_DN35569_c11_g1_i3	1523	1274.26	120.57	4.06	4.32	100
Alpha-latroinsectotoxin-Lt1a_2	Echis_coloratus_Venom_gland1	TRINITY_DN32320_c0_g1_i2	1890	1641.26	153.21	4	4.26	100
Alpha-latroinsectotoxin-Lt1a_2	Echis_coloratus_Venom_gland1	TRINITY_DN90024_c0_g1_i1	2063	1814.26	167	3.95	4.2	100
C-type_lectin_6	Echis_coloratus_Venom_gland1	TRINITY_DN22416_c0_g1_i1	1106	857.26	77	3.85	4.1	100
C-type_lectin_mannose-binding_isoform_30	Echis_coloratus_Venom_gland1	TRINITY_DN35223_c5_g6_i2	502	253.27	22.5	3.81	4.06	100
C-type_lectin_6	Echis_coloratus_Venom_gland1	TRINITY_DN95333_c0_g1_i1	785	536.26	46	3.68	3.92	100
Alpha-latroinsectotoxin-Lt1a_2	Echis_coloratus_Venom_gland1	TRINITY_DN33337_c1_g1_i4	5994	5745.26	489.64	3.65	3.89	100
Alpha-latroinsectotoxin-Lt1a_2	Echis_coloratus_Venom_gland1	TRINITY_DN25614_c0_g1_i1	1692	1443.26	115.18	3.42	3.64	100
Basic_phospholipase_A2_2_60	Echis_coloratus_Venom_gland1	TRINITY_DN31485_c1_g2_i8	526	277.27	21.96	3.39	3.62	100
KappaPI-theraphotoxin-Hs1a_80	Echis_coloratus_Venom_gland1	TRINITY_DN34243_c0_g1_i2	2172	1923.26	152.27	3.39	3.62	100
Disintegrin_bitistatin_6	Echis_coloratus_Venom_gland1	TRINITY_DN27053_c0_g2_i2	768	519.26	38.07	3.14	3.35	100
Acetylcholinesterase-1_1	Echis_coloratus_Venom_gland1	TRINITY_DN75185_c0_g1_i1	1878	1629.26	118	3.1	3.31	100
Alpha-latroinsectotoxin-Lt1a_2	Echis_coloratus_Venom_gland1	TRINITY_DN26150_c0_g2_i1	4703	4454.26	308.76	2.97	3.17	100
Alpha-latroinsectotoxin-Lt1a_2	Echis_coloratus_Venom_gland1	TRINITY_DN15507_c0_g1_i1	3266	3017.26	209	2.97	3.16	100
Alpha-latroinsectotoxin-Lt1a_2	Echis_coloratus_Venom_gland1	TRINITY_DN34711_c0_g1_i1	1406	1157.26	79	2.93	3.12	100
Vespryn_2	Echis_coloratus_Venom_gland1	TRINITY_DN35621_c0_g3_i1	442	193.28	13	2.88	3.07	100
KappaPI-theraphotoxin-Hs1a_80	Echis_coloratus_Venom_gland1	TRINITY_DN18866_c0_g3_i2	1500	1251.26	82.76	2.84	3.02	100
Factor_V_activator_RVV-V_gamma_142	Echis_coloratus_Venom_gland1	TRINITY_DN34657_c3_g1_i4	1623	1374.26	90.3	2.82	3	100
Cystatin_2	Echis_coloratus_Venom_gland1	TRINITY_DN18081_c0_g1_i1	682	433.26	28	2.77	2.95	100
C-type_lectin_mannose-binding_isoform_30	Echis_coloratus_Venom_gland1	TRINITY_DN34768_c7_g1_i4	1608	1359.26	87.9	2.77	2.95	100
Techylectin-like_protein_1	Echis_coloratus_Venom_gland1	TRINITY_DN76038_c0_g1_i1	578	329.26	21	2.73	2.91	100
Acidic_phospholipase_A2_1_322	Echis_coloratus_Venom_gland1	TRINITY_DN27355_c0_g1_i7	1057	808.26	49.59	2.63	2.8	100
KappaPI-theraphotoxin-Hs1a_80	Echis_coloratus_Venom_gland1	TRINITY_DN18866_c0_g3_i1	1320	1071.26	65.21	2.61	2.78	100
Alpha-latroinsectotoxin-Lt1a_2	Echis_coloratus_Venom_gland1	TRINITY_DN26236_c0_g1_i2	1302	1053.26	63.85	2.6	2.77	100
C-type_lectin_mannose-binding_isoform_30	Echis_coloratus_Venom_gland1	TRINITY_DN35569_c11_g1_i2	1136	887.26	52.71	2.55	2.71	100
Factor_V_activator_RVV-V_gamma_142	Echis_coloratus_Venom_gland1	TRINITY_DN6773_c0_g2_i1	1403	1154.26	61.2	2.27	2.42	100
Factor_V_activator_RVV-V_gamma_142	Echis_coloratus_Venom_gland1	TRINITY_DN4995_c0_g1_i1	1492	1243.26	65	2.24	2.39	100
KappaPI-theraphotoxin-Hs1a_80	Echis_coloratus_Venom_gland1	TRINITY_DN30687_c0_g1_i2	6785	6536.26	339.49	2.23	2.37	100
Hyaluronidase_1	Echis_coloratus_Venom_gland1	TRINITY_DN33354_c2_g3_i1	1863	1614.26	83.39	2.21	2.36	100
C-type_lectin_mannose-binding_isoform_30	Echis_coloratus_Venom_gland1	TRINITY_DN33940_c2_g1_i1	2431	2182.26	109.39	2.15	2.29	100
C-type_lectin_6	Echis_coloratus_Venom_gland1	TRINITY_DN36051_c0_g1_i1	452	203.27	10	2.11	2.25	100
Alpha-latroinsectotoxin-Lt1a_2	Echis_coloratus_Venom_gland1	TRINITY_DN30119_c0_g1_i1	1100	851.26	41	2.06	2.2	100
Disintegrin_acostatin-alpha_26	Echis_coloratus_Venom_gland1	TRINITY_DN36324_c0_g1_i1	499	250.27	12	2.06	2.19	100
C-type_lectin_6	Echis_coloratus_Venom_gland1	TRINITY_DN11994_c0_g1_i2	985	736.26	34.81	2.03	2.16	100
C-type_lectin_mannose-binding_isoform_30	Echis_coloratus_Venom_gland1	TRINITY_DN34768_c7_g1_i11	925	676.26	31.8	2.02	2.15	100
Acetylcholinesterase-1_1	Echis_coloratus_Venom_gland1	TRINITY_DN27447_c0_g1_i3	2309	2060.26	94.68	1.97	2.1	100
Factor_V_activator_RVV-V_gamma_142	Echis_coloratus_Venom_gland1	TRINITY_DN25600_c0_g1_i1	1362	1113.26	50	1.93	2.05	100
Cysteine-rich_venom_protein_Mr30_2	Echis_coloratus_Venom_gland1	TRINITY_DN28194_c0_g2_i12	2812	2563.26	112.12	1.88	2	100
Acidic_phospholipase_A2_1_322	Echis_coloratus_Venom_gland1	TRINITY_DN27355_c0_g1_i8	2533	2284.26	98.6	1.85	1.97	100
Hyaluronidase_1	Echis_coloratus_Venom_gland1	TRINITY_DN5774_c0_g1_i1	2239	1990.26	85	1.83	1.95	100
Vespryn_2	Echis_coloratus_Venom_gland1	TRINITY_DN35621_c0_g1_i7	2490	2241.26	93.97	1.8	1.91	100
C-type_lectin_6	Echis_coloratus_Venom_gland1	TRINITY_DN47389_c0_g1_i1	470	221.27	9	1.74	1.86	100
Techylectin-like_protein_1	Echis_coloratus_Venom_gland1	TRINITY_DN33712_c1_g1_i1	1548	1299.26	52	1.72	1.83	100
Astacin-like_metalloprotease_toxin_1_1	Echis_coloratus_Venom_gland1	TRINITY_DN30212_c0_g1_i7	1554	1305.26	51.57	1.69	1.8	100
C-type_lectin_mannose-binding_isoform_30	Echis_coloratus_Venom_gland1	TRINITY_DN34768_c7_g1_i10	1096	847.26	33.45	1.69	1.8	100
Disintegrin_bitistatin_6	Echis_coloratus_Venom_gland1	TRINITY_DN30039_c0_g1_i1	2906	2657.26	104	1.68	1.79	100
Alpha-latroinsectotoxin-Lt1a_2	Echis_coloratus_Venom_gland1	TRINITY_DN26236_c0_g1_i1	2492	2243.26	86.92	1.66	1.77	100
Acetylcholinesterase-1_1	Echis_coloratus_Venom_gland1	TRINITY_DN27447_c0_g1_i1	1758	1509.26	57	1.62	1.72	100
Vespryn_2	Echis_coloratus_Venom_gland1	TRINITY_DN35289_c12_g1_i1	1513	1264.26	46.76	1.59	1.69	100
Vespryn_2	Echis_coloratus_Venom_gland1	TRINITY_DN35621_c0_g1_i4	1842	1593.26	58.71	1.58	1.68	100
Vespryn_2	Echis_coloratus_Venom_gland1	TRINITY_DN29350_c1_g1_i1	2115	1866.26	67	1.54	1.64	100
Acetylcholinesterase-1_1	Echis_coloratus_Venom_gland1	TRINITY_DN38611_c0_g1_i1	639	390.26	14	1.54	1.64	100
Hyaluronidase_CdtHya1_1	Echis_coloratus_Venom_gland1	TRINITY_DN33354_c2_g3_i2	1098	849.26	29.37	1.48	1.58	100
Venom_allergen_3_30	Echis_coloratus_Venom_gland1	TRINITY_DN90230_c0_g1_i1	519	270.27	9	1.43	1.52	100
C-type_lectin_mannose-binding_isoform_30	Echis_coloratus_Venom_gland1	TRINITY_DN35405_c0_g1_i5	2388	2139.26	70.52	1.41	1.51	100
Astacin-like_metalloprotease_toxin_1_1	Echis_coloratus_Venom_gland1	TRINITY_DN30212_c0_g1_i4	2332	2083.26	68.36	1.41	1.5	100
C-type_lectin_mannose-binding_isoform_30	Echis_coloratus_Venom_gland1	TRINITY_DN12509_c0_g1_i1	495	246.27	8	1.39	1.48	100
Factor_V_activator_RVV-V_gamma_142	Echis_coloratus_Venom_gland1	TRINITY_DN29127_c0_g1_i2	3260	3011.26	97.77	1.39	1.48	100
Turripeptide_Ici9	Echis_coloratus_Venom_gland1	TRINITY_DN17419_c0_g1_i1	1523	1274.26	40	1.35	1.43	100
Venom_allergen_3_30	Echis_coloratus_Venom_gland1	TRINITY_DN82297_c0_g1_i1	602	353.26	11	1.33	1.42	100
Disintegrin_acostatin-alpha_26	Echis_coloratus_Venom_gland1	TRINITY_DN35594_c0_g5_i14	517	268.27	7.97	1.27	1.36	100
Cysteine-rich_venom_protein_Mr30_2	Echis_coloratus_Venom_gland1	TRINITY_DN62283_c0_g1_i1	987	738.26	22	1.28	1.36	100
Factor_V_activator_RVV-V_gamma_142	Echis_coloratus_Venom_gland1	TRINITY_DN6773_c0_g1_i1	1322	1073.26	31.8	1.27	1.35	100
KappaPI-theraphotoxin-Hs1a_80	Echis_coloratus_Venom_gland1	TRINITY_DN34243_c0_g1_i1	2154	1905.26	55.65	1.25	1.33	100
Galactose-specific_lectin_nattectin_1	Echis_coloratus_Venom_gland1	TRINITY_DN27228_c0_g1_i1	3045	2796.26	79	1.21	1.29	100
Acetylcholinesterase-1_1	Echis_coloratus_Venom_gland1	TRINITY_DN39541_c0_g1_i1	662	413.26	11	1.14	1.22	100
Neprilysin-1_1	Echis_coloratus_Venom_gland1	TRINITY_DN21163_c0_g1_i1	1231	982.26	26	1.13	1.21	100
Galactose-specific_lectin_nattectin_1	Echis_coloratus_Venom_gland1	TRINITY_DN111426_c0_g1_i1	564	315.27	8	1.09	1.16	100
Snake_venom_vascular_endothelial_growth_factor_toxin_VR-1_1	Echis_coloratus_Venom_gland1	TRINITY_DN33279_c0_g1_i3	1055	806.26	19.84	1.05	1.12	100
L-amino-acid_oxidase_31	Echis_coloratus_Venom_gland1	TRINITY_DN36143_c0_g1_i1	1515	1266.26	31	1.05	1.12	100
Factor_V_activator_RVV-V_gamma_142	Echis_coloratus_Venom_gland1	TRINITY_DN60163_c0_g1_i1	699	450.26	11	1.05	1.12	100
Alpha-latroinsectotoxin-Lt1a_2	Echis_coloratus_Venom_gland1	TRINITY_DN80612_c0_g1_i1	455	206.27	5	1.04	1.11	100
Alpha-latroinsectotoxin-Lt1a_2	Echis_coloratus_Venom_gland1	TRINITY_DN31462_c0_g1_i1	1180	931.26	22.46	1.03	1.1	100
Galactose-specific_lectin_nattectin_1	Echis_coloratus_Venom_gland1	TRINITY_DN26061_c0_g1_i1	2303	2054.26	47.76	1	1.06	100
Zinc_metalloproteinase@disintegrin_107	Echis_coloratus_Venom_gland1	TRINITY_DN86943_c0_g1_i1	1011	762.26	17	0.96	1.02	100
Thrombin-like_enzyme_ancrod_11	Echis_coloratus_Venom_gland1	TRINITY_DN117148_c0_g1_i1	389	140.29	3	0.92	0.98	100
Disintegrin_acostatin-alpha_26	Echis_coloratus_Venom_gland1	TRINITY_DN35594_c0_g5_i10	511	262.27	5.58	0.91	0.97	100
Cysteine-rich_venom_protein_Mr30_2	Echis_coloratus_Venom_gland1	TRINITY_DN11386_c0_g1_i1	1017	768.26	16	0.89	0.95	100
Thrombin-like_enzyme_ancrod_11	Echis_coloratus_Venom_gland1	TRINITY_DN33991_c0_g1_i2	5669	5420.26	110.35	0.87	0.93	100
Cathelicidin-related_peptide_Bf-CRAMP_11	Echis_coloratus_Venom_gland1	TRINITY_DN112270_c0_g1_i1	619	370.26	7	0.81	0.86	100
Astacin-like_metalloprotease_toxin_1_1	Echis_coloratus_Venom_gland1	TRINITY_DN33557_c0_g1_i3	2718	2469.26	41.87	0.73	0.77	100
Alpha-latroinsectotoxin-Lt1a_2	Echis_coloratus_Venom_gland1	TRINITY_DN34658_c0_g1_i5	3715	3466.26	54.94	0.68	0.72	100
Putative_protein-glutamate_O-methyltransferase_1	Echis_coloratus_Venom_gland1	TRINITY_DN5271_c0_g2_i1	1867	1618.26	25.59	0.68	0.72	100
Vespryn_2	Echis_coloratus_Venom_gland1	TRINITY_DN30224_c0_g2_i1	1706	1457.26	22.42	0.66	0.7	100
Disintegrin-like_leberagin-C_8	Echis_coloratus_Venom_gland1	TRINITY_DN35594_c0_g2_i1	314	65.46	1.01	0.66	0.7	100
Snake_venom_vascular_endothelial_growth_factor_toxin_VR-1_1	Echis_coloratus_Venom_gland1	TRINITY_DN10529_c0_g1_i1	927	678.26	10	0.63	0.67	100
Vespryn_2	Echis_coloratus_Venom_gland1	TRINITY_DN38949_c0_g1_i1	999	750.26	11	0.63	0.67	100
Acidic_phospholipase_A2_1_322	Echis_coloratus_Venom_gland1	TRINITY_DN27355_c0_g1_i5	2256	2007.26	28.41	0.61	0.65	100
C-type_lectin_6	Echis_coloratus_Venom_gland1	TRINITY_DN28516_c0_g1_i1	785	536.26	7.47	0.6	0.64	100
KappaPI-theraphotoxin-Hs1a_80	Echis_coloratus_Venom_gland1	TRINITY_DN30687_c0_g1_i3	6872	6623.26	91.83	0.59	0.63	100
Alpha-latroinsectotoxin-Lt1a_2	Echis_coloratus_Venom_gland1	TRINITY_DN34633_c4_g1_i1	3649	3400.26	44.48	0.56	0.6	100
Galactose-specific_lectin_nattectin_1	Echis_coloratus_Venom_gland1	TRINITY_DN26061_c0_g1_i3	2366	2117.26	26.24	0.53	0.57	100
Thrombin-like_enzyme_ancrod_11	Echis_coloratus_Venom_gland1	TRINITY_DN33991_c0_g1_i5	5512	5263.26	61.76	0.5	0.54	100
Delta-latroinsectotoxin-Lt1a_1	Echis_coloratus_Venom_gland1	TRINITY_DN34181_c5_g2_i5	3778	3529.26	39.24	0.48	0.51	100
Venom_prothrombin_activator_pseutarin-C_catalytic_subunit_12	Echis_coloratus_Venom_gland1	TRINITY_DN10270_c0_g1_i1	546	297.27	2.96	0.43	0.45	100
Zinc_metalloproteinase@disintegrin_107	Echis_coloratus_Venom_gland1	TRINITY_DN46803_c0_g1_i1	561	312.27	3	0.41	0.44	100
KappaPI-theraphotoxin-Hs1a_80	Echis_coloratus_Venom_gland1	TRINITY_DN105984_c0_g2_i1	1520	1271.26	11.37	0.38	0.41	100
Venom_prothrombin_activator_pseutarin-C_catalytic_subunit_12	Echis_coloratus_Venom_gland1	TRINITY_DN28486_c0_g1_i10	1060	811.26	6.32	0.33	0.36	100
Disintegrin_bitistatin_6	Echis_coloratus_Venom_gland1	TRINITY_DN17340_c0_g1_i3	1883	1634.26	12.19	0.32	0.34	100
Acetylcholinesterase-1_1	Echis_coloratus_Venom_gland1	TRINITY_DN27447_c0_g1_i4	1866	1617.26	10.74	0.28	0.3	100
Alpha-latroinsectotoxin-Lt1a_2	Echis_coloratus_Venom_gland1	TRINITY_DN31580_c0_g1_i1	4715	4466.26	27.35	0.26	0.28	100
Alpha-latroinsectotoxin-Lt1a_2	Echis_coloratus_Venom_gland1	TRINITY_DN22087_c0_g2_i1	848	599.26	3.58	0.26	0.27	100
Disintegrin_bitistatin_6	Echis_coloratus_Venom_gland1	TRINITY_DN17340_c0_g1_i1	1077	828.26	4.33	0.22	0.24	100
L-amino-acid_oxidase_1	Echis_coloratus_Venom_gland1	TRINITY_DN30646_c0_g1_i2	536	287.27	1.5	0.22	0.24	100
Disintegrin_bitistatin_6	Echis_coloratus_Venom_gland1	TRINITY_DN17340_c0_g1_i2	1391	1142.26	5.67	0.21	0.23	100
Vespryn_2	Echis_coloratus_Venom_gland1	TRINITY_DN31521_c0_g1_i6	2736	2487.26	9.63	0.17	0.18	100
KappaPI-theraphotoxin-Hs1a_80	Echis_coloratus_Venom_gland1	TRINITY_DN34223_c8_g2_i7	6578	6329.26	24.08	0.16	0.17	100
Vespryn_2	Echis_coloratus_Venom_gland1	TRINITY_DN31521_c0_g1_i3	3746	3497.26	6.75	0.08	0.09	100
Factor_V_activator_RVV-V_gamma_142	Echis_coloratus_Venom_gland1	TRINITY_DN34657_c3_g1_i3	1465	1216.26	1.88	0.07	0.07	100

## Sheet: S. Table 3. T_bicarinatum
Toxin Name	Sample	transcript_id	length	effective_length	expected_count	TPM	FPKM	IsoPct		N	UNIQUE	AB_TOTAL	VG_TOTAL	AB_MAX	VG_MAX				Toxin Name	AB_MAX		Toxin Name	VG_MAX
Acetylcholinesterase-1_1	AB_RSEM.txt	TRINITY_DN31030_c0_g2_i1	457	180.37	145	5.54	9.86	100		67	67	34.84	9.6	5.54	2.4	Acetylcholinesterase-1_1			Acetylcholinesterase-1_1	5.54		Acetylcholinesterase-1_1	2.4
Acetylcholinesterase-1_1	AB_RSEM.txt	TRINITY_DN38135_c0_g2_i9	1563	1286.28	690.17	3.7	6.58	41.91		2	2	50.69	0.12	50.48	0.06	Alpha-amylase_1			Alpha-amylase_1	50.48		Alpha-amylase_1	0.06
Acetylcholinesterase-1_1	AB_RSEM.txt	TRINITY_DN40584_c1_g1_i3	1916	1639.28	769.55	3.23	5.76	29.93		280	280	222.53	251.58	40.99	15.98	Alpha-latroinsectotoxin-Lt1a_2			Alpha-latroinsectotoxin-Lt1a_2	40.99		Alpha-latroinsectotoxin-Lt1a_2	15.98
Acetylcholinesterase-1_1	AB_RSEM.txt	TRINITY_DN34158_c0_g6_i1	2038	1761.28	598.47	2.34	4.17	55.96		4	4	3.75	0.64	1.67	0.64	Astacin-like_metalloprotease_toxin_1_1			Astacin-like_metalloprotease_toxin_1_1	1.67		Astacin-like_metalloprotease_toxin_1_1	0.64
Acetylcholinesterase-1_1	AB_RSEM.txt	TRINITY_DN41757_c0_g1_i7	2099	1822.28	522.56	1.97	3.52	92.78		3	0	0	0	0	0	Astacin-like_metalloprotease_toxin_3_2			Conophysin-R_1	0.65		Conophysin-R_1	0.08
Acetylcholinesterase-1_1	AB_RSEM.txt	TRINITY_DN40528_c0_g3_i1	1485	1208.28	343	1.95	3.48	100		3	0	0	0	0	0	Astacin-like_metalloprotease_toxin_4_1			Cysteine-rich_venom_protein_bucarin_1	2.29		Cysteine-rich_venom_protein_bucarin_1	0.07
Acetylcholinesterase-1_1	AB_RSEM.txt	TRINITY_DN34158_c0_g6_i4	1818	1541.28	412.19	1.84	3.28	44.04		3	0	0	0	0	0	Astacin-like_metalloprotease_toxin_5_1			Cysteine-rich_venom_protein_Mr30_2	16.41		Cysteine-rich_venom_protein_Mr30_2	465.51
Acetylcholinesterase-1_1	AB_RSEM.txt	TRINITY_DN31778_c0_g1_i2	757	480.28	113.15	1.62	2.89	80.62		4	4	0.85	0.13	0.65	0.08	Conophysin-R_1			Delta-latroinsectotoxin-Lt1a_1	8.71		Delta-latroinsectotoxin-Lt1a_1	3.91
Acetylcholinesterase-1_1	AB_RSEM.txt	TRINITY_DN64206_c0_g1_i1	328	58.87	13	1.52	2.71	100		3	3	4.89	0.12	2.29	0.07	Cysteine-rich_venom_protein_bucarin_1			Disintegrin_acostatin-alpha_26	7.08		Disintegrin_acostatin-alpha_26	0.07
Acetylcholinesterase-1_1	AB_RSEM.txt	TRINITY_DN43664_c0_g6_i8	674	397.29	86.47	1.5	2.67	66.64		9	6	31.77	793.28	16.41	465.51	Cysteine-rich_venom_protein_Mr30_2			Disintegrin_bitistatin_6	0.59		Disintegrin_bitistatin_6	13.4
Acetylcholinesterase-1_1	AB_RSEM.txt	TRINITY_DN40584_c1_g1_i6	2440	2163.28	378.37	1.2	2.15	11.15		3	0	0	0	0	0	Cysteine-rich_venom_protein_VAR9_3			Factor_V_activator_RVV-V_gamma_142	10.61		Factor_V_activator_RVV-V_gamma_142	26.05
Acetylcholinesterase-1_1	AB_RSEM.txt	TRINITY_DN38135_c0_g2_i4	1960	1683.28	236.65	0.97	1.73	10.98		268	9	15.95	10.41	8.71	3.91	Delta-latroinsectotoxin-Lt1a_1			Galactose-specific_lectin_nattectin_1	2.25		Galactose-specific_lectin_nattectin_1	0.6
Acetylcholinesterase-1_1	AB_RSEM.txt	TRINITY_DN44380_c2_g1_i1	981	704.28	90	0.88	1.57	100		2	2	13.04	0.07	7.08	0.07	Disintegrin_acostatin-alpha_26			Hyaluronidase_1	1.42		Hyaluronidase_1	5.42
Acetylcholinesterase-1_1	AB_RSEM.txt	TRINITY_DN11582_c0_g2_i1	600	323.3	40.62	0.87	1.54	100		9	7	1.63	15.89	0.59	13.4	Disintegrin_bitistatin_6			KappaPI-theraphotoxin-Hs1a_80	1.02		KappaPI-theraphotoxin-Hs1a_80	1.14
Acetylcholinesterase-1_1	AB_RSEM.txt	TRINITY_DN70822_c0_g1_i1	609	332.3	38	0.79	1.4	100		2	0	0	0	0	0	Disintegrin_EMF10B_17			Kunitz-type_serine_protease_inhibitor_2_4	0.57		Kunitz-type_serine_protease_inhibitor_2_4	0.34
Acetylcholinesterase-1_1	AB_RSEM.txt	TRINITY_DN33151_c0_g1_i1	1002	725.28	81	0.77	1.37	100		9	0	0	0	0	0	Disintegrin-like_leberagin-C_8			Kunitz-type_serine_protease_inhibitor_As-fr-19_1	0		Kunitz-type_serine_protease_inhibitor_As-fr-19_1	0.87
Acetylcholinesterase-1_1	AB_RSEM.txt	TRINITY_DN11712_c0_g1_i1	376	100.56	7	0.48	0.85	100		2	0	0	0	0	0	Disintegrin_saxatilin_24			Kunitz-type_serine_protease_inhibitor_bitisilin-3_1	2.38		Kunitz-type_serine_protease_inhibitor_bitisilin-3_1	0.2
Acetylcholinesterase-1_1	AB_RSEM.txt	TRINITY_DN38093_c0_g1_i11	509	232.34	15	0.44	0.79	48.2		45	45	78.95	58.76	10.61	26.05	Factor_V_activator_RVV-V_gamma_142			Kunitz-type_serine_protease_inhibitor_BmKTT-2_1	13.66		Kunitz-type_serine_protease_inhibitor_BmKTT-2_1	1.19
Acetylcholinesterase-1_1	AB_RSEM.txt	TRINITY_DN31778_c0_g1_i1	1104	827.28	46.85	0.39	0.69	19.38		1	1	2.25	0.6	2.25	0.6	Galactose-specific_lectin_nattectin_1			Neprilysin-1_1	80.35		Neprilysin-1_1	5.7
Acetylcholinesterase-1_1	AB_RSEM.txt	TRINITY_DN38135_c0_g2_i7	2144	1867.28	101.66	0.37	0.67	4.25		8	8	2.61	13.32	1.42	5.42	Hyaluronidase_1			Peroxiredoxin-4_1	5.53		Peroxiredoxin-4_1	19.46
Acetylcholinesterase-1_1	AB_RSEM.txt	TRINITY_DN27511_c0_g1_i2	2839	2562.28	108.82	0.29	0.52	74.44		3	0	0	0	0	0	Hyaluronidase_conohyal-ad1_1			Phospholipase_A1_19	12.53		Phospholipase_A1_19	8.24
Acetylcholinesterase-1_1	AB_RSEM.txt	TRINITY_DN40584_c1_g1_i4	1645	1368.28	54.19	0.27	0.49	2.52		5	0	0	0	0	0	Hyaluronidase_conohyal-Cn1_1			Phospholipase_A2_1	1.92		Phospholipase_A2_1	6.37
Acetylcholinesterase-1_1	AB_RSEM.txt	TRINITY_DN43664_c0_g6_i19	1923	1646.28	57.87	0.24	0.43	10.76		8	8	2.92	2.31	1.02	1.14	KappaPI-theraphotoxin-Hs1a_80			Plancitoxin-1_1	2.06		Plancitoxin-1_1	0.14
Acetylcholinesterase-1_1	AB_RSEM.txt	TRINITY_DN38093_c0_g1_i5	5177	4900.28	168.58	0.24	0.42	25.69		3	0	0	0	0	0	Kunitz-type_conkunitzin-S1_2			Putative_protein-glutamate_O-methyltransferase_1	2.17		Putative_protein-glutamate_O-methyltransferase_1	0.32
Acetylcholinesterase-1_1	AB_RSEM.txt	TRINITY_DN38093_c0_g1_i10	5177	4900.28	168.58	0.24	0.42	25.69		2	1	0.57	0.34	0.57	0.34	Kunitz-type_serine_protease_inhibitor_2_4			Serine_proteinase-like_BMK-CBP_1	0.52		Serine_proteinase-like_BMK-CBP_1	0.34
Acetylcholinesterase-1_1	AB_RSEM.txt	TRINITY_DN38135_c0_g2_i10	1924	1647.28	55.53	0.23	0.41	2.63		10	1	0	0.87	0	0.87	Kunitz-type_serine_protease_inhibitor_As-fr-19_1			Snake_venom_metalloproteinase_Ac1_1	0.27		Snake_venom_metalloproteinase_Ac1_1	0.69
Acetylcholinesterase-1_1	AB_RSEM.txt	TRINITY_DN40584_c1_g1_i8	1771	1494.28	36.71	0.17	0.3	1.57		13	3	2.96	0.2	2.38	0.2	Kunitz-type_serine_protease_inhibitor_bitisilin-3_1			Snake_venom_metalloproteinase_fibrolase_19	4.13		Snake_venom_metalloproteinase_fibrolase_19	0.8
Acetylcholinesterase-1_1	AB_RSEM.txt	TRINITY_DN43664_c0_g6_i21	2009	1732.28	34.51	0.14	0.24	6.1		19	6	22.52	1.46	13.66	1.19	Kunitz-type_serine_protease_inhibitor_BmKTT-2_1			Techylectin-like_protein_1	4.53		Techylectin-like_protein_1	0.47
Acetylcholinesterase-1_1	AB_RSEM.txt	TRINITY_DN25525_c0_g1_i1	477	200.35	4	0.14	0.24	100		14	0	0	0	0	0	Kunitz-type_serine_protease_inhibitor_BmKTT-3_1			Thrombin-like_enzyme_ancrod_11	6.21		Thrombin-like_enzyme_ancrod_11	29.96
Acetylcholinesterase-1_1	AB_RSEM.txt	TRINITY_DN11582_c0_g1_i1	601	324.3	6.38	0.14	0.24	100		12	0	0	0	0	0	Kunitz-type_serine_protease_inhibitor_conotoxin_Cal9			Thrombin-like_enzyme_TLBm_1	0.24		Thrombin-like_enzyme_TLBm_1	0.64
Acetylcholinesterase-1_1	AB_RSEM.txt	TRINITY_DN43664_c0_g6_i11	788	511.28	8.19	0.11	0.2	4.9		19	0	0	0	0	0	Kunitz-type_serine_protease_inhibitor_Hg1_1			Toxin_Bcs_III_15	0.55		Toxin_Bcs_III_15	0.08
Acetylcholinesterase-1_1	AB_RSEM.txt	TRINITY_DN41757_c0_g1_i4	2173	1896.28	27.03	0.1	0.17	4.61		6	0	0	0	0	0	Kunitz-type_serine_protease_inhibitor_homolog_alpha-dendrotoxin_3			Turripeptide_Ici9	0.84		Turripeptide_Ici9	0.03
Acetylcholinesterase-1_1	AB_RSEM.txt	TRINITY_DN27511_c0_g1_i1	1523	1246.28	18.18	0.1	0.18	25.56		2	0	0	0	0	0	Kunitz-type_serine_protease_inhibitor_homolog_beta-bungarotoxin_B5-B_chain_1			Venom_allergen_3_30	0.89		Venom_allergen_3_30	3492.8
Acetylcholinesterase-1_1	AB_RSEM.txt	TRINITY_DN41757_c0_g1_i6	2185	1908.28	15.42	0.06	0.1	2.61		3	0	0	0	0	0	Kunitz-type_serine_protease_inhibitor_homolog_delta-dendrotoxin_2			Venom_allergen_4_1	0		Venom_allergen_4_1	0.46
Acetylcholinesterase-1_1	AB_RSEM.txt	TRINITY_DN41757_c0_g1_i1	2347	2070.28	0	0	0	0		10	0	0	0	0	0	Kunitz-type_serine_protease_inhibitor_homolog_dendrotoxin_K_154			Venom_allergen_5_1	5.89		Venom_allergen_5_1	16.25
Acetylcholinesterase-1_1	AB_RSEM.txt	TRINITY_DN41757_c0_g1_i2	2259	1982.28	0	0	0	0		19	0	0	0	0	0	Kunitz-type_serine_protease_inhibitor_Kunitz-1_1			Venom_allergen_5_15	0		Venom_allergen_5_15	0
Acetylcholinesterase-1_1	AB_RSEM.txt	TRINITY_DN41757_c0_g1_i3	2421	2144.28	0	0	0	0		10	0	0	0	0	0	Kunitz-type_serine_protease_inhibitor_PIVL_13			Venom_peptide_isomerase_heavy_chain_2	6.42		Venom_peptide_isomerase_heavy_chain_2	1.98
Acetylcholinesterase-1_1	AB_RSEM.txt	TRINITY_DN41757_c0_g1_i5	2335	2058.28	0	0	0	0		12	0	0	0	0	0	Kunitz-type_serine_protease_inhibitor_U1-aranetoxin-Av1a_1			Venom_protein_55	10.97		Venom_protein_55	0.07
Acetylcholinesterase-1_1	AB_RSEM.txt	TRINITY_DN41757_c0_g1_i8	2261	1984.28	0	0	0	0		3	0	0	0	0	0	Nematocyte_expressed_protein_6_1			Venom_prothrombin_activator_pseutarin-C_catalytic_subunit_12	2.85		Venom_prothrombin_activator_pseutarin-C_catalytic_subunit_12	10.51
Acetylcholinesterase-1_1	AB_RSEM.txt	TRINITY_DN43664_c0_g6_i3	874	597.28	0	0	0	0		65	65	267.69	20.25	80.35	5.7	Neprilysin-1_1			Zinc_metalloproteinase@disintegrin_107	1.29		Zinc_metalloproteinase@disintegrin_107	1.99
Acetylcholinesterase-1_1	AB_RSEM.txt	TRINITY_DN43664_c0_g6_i4	857	580.28	0	0	0	0		5	5	11.05	23	5.53	19.46	Peroxiredoxin-4_1			Zinc_metalloproteinase-disintegrin-like_alternagin_2	0		Zinc_metalloproteinase-disintegrin-like_alternagin_2	0
Acetylcholinesterase-1_1	AB_RSEM.txt	TRINITY_DN43664_c0_g6_i5	1927	1650.28	0	0	0	0		85	85	82.72	41.47	12.53	8.24	Phospholipase_A1_19			Zinc_metalloproteinase-disintegrin-like_VAP2B_272	0.63		Zinc_metalloproteinase-disintegrin-like_VAP2B_272	3.84
Acetylcholinesterase-1_1	AB_RSEM.txt	TRINITY_DN43664_c0_g6_i6	950	673.28	0	0	0	0		12	12	9.48	8.9	1.92	6.37	Phospholipase_A2_1
Acetylcholinesterase-1_1	AB_RSEM.txt	TRINITY_DN43664_c0_g6_i7	885	608.28	0	0	0	0		10	0	0	0	0	0	Phospholipase_A2_imperatoxin-1_4
Acetylcholinesterase-1_1	AB_RSEM.txt	TRINITY_DN43664_c0_g6_i9	853	576.28	0	0	0	0		10	0	0	0	0	0	Phospholipase_A2_large_subunit_1
Acetylcholinesterase-1_1	AB_RSEM.txt	TRINITY_DN43664_c0_g6_i10	760	483.28	0	0	0	0		10	0	0	0	0	0	Phospholipase_A2_phaiodactylipin_6
Acetylcholinesterase-1_1	AB_RSEM.txt	TRINITY_DN43664_c0_g6_i13	767	490.28	0	0	0	0		4	4	2.8	0.14	2.06	0.14	Plancitoxin-1_1
Acetylcholinesterase-1_1	AB_RSEM.txt	TRINITY_DN43664_c0_g6_i14	1830	1553.28	0	0	0	0		19	0	0	0	0	0	Protease_inhibitor_1_6
Acetylcholinesterase-1_1	AB_RSEM.txt	TRINITY_DN43664_c0_g6_i16	771	494.28	0	0	0	0		5	5	3.19	0.8	2.17	0.32	Putative_protein-glutamate_O-methyltransferase_1
Acetylcholinesterase-1_1	AB_RSEM.txt	TRINITY_DN43664_c0_g6_i17	1916	1639.28	0	0	0	0		15	4	1.52	0.42	0.52	0.34	Serine_proteinase-like_BMK-CBP_1
Acetylcholinesterase-1_1	AB_RSEM.txt	TRINITY_DN43664_c0_g6_i18	864	587.28	0	0	0	0		11	4	0.52	1	0.27	0.69	Snake_venom_metalloproteinase_Ac1_1
Acetylcholinesterase-1_1	AB_RSEM.txt	TRINITY_DN43664_c0_g6_i20	2013	1736.28	0	0	0	0		11	0	0	0	0	0	Snake_venom_metalloproteinase_acutolysin-C_1
Acetylcholinesterase-1_1	AB_RSEM.txt	TRINITY_DN11712_c0_g2_i1	362	87.66	0	0	0	0		13	2	4.45	0.8	4.13	0.8	Snake_venom_metalloproteinase_fibrolase_19
Acetylcholinesterase-1_1	AB_RSEM.txt	TRINITY_DN34474_c0_g2_i1	396	119.76	0	0	0	0		2	2	5.33	0.47	4.53	0.47	Techylectin-like_protein_1
Acetylcholinesterase-1_1	AB_RSEM.txt	TRINITY_DN40584_c1_g1_i2	2838	2561.28	0	0	0	0		58	17	15.6	35.84	6.21	29.96	Thrombin-like_enzyme_ancrod_11
Acetylcholinesterase-1_1	AB_RSEM.txt	TRINITY_DN40584_c1_g1_i5	2169	1892.28	0	0	0	0		18	1	0.24	0.64	0.24	0.64	Thrombin-like_enzyme_TLBm_1
Acetylcholinesterase-1_1	AB_RSEM.txt	TRINITY_DN40584_c1_g1_i7	1247	970.28	0	0	0	0		2	2	0.98	0.08	0.55	0.08	Toxin_Bcs_III_15
Acetylcholinesterase-1_1	AB_RSEM.txt	TRINITY_DN40584_c1_g1_i9	2314	2037.28	1.03	0	0.01	0.03		1	1	0.84	0.03	0.84	0.03	Turripeptide_Ici9
Acetylcholinesterase-1_1	AB_RSEM.txt	TRINITY_DN40584_c1_g1_i10	1406	1129.28	0	0	0	0		14	5	1.81	5840.81	0.89	3492.8	Venom_allergen_3_30
Acetylcholinesterase-1_1	AB_RSEM.txt	TRINITY_DN43159_c0_g5_i2	698	421.28	0	0	0	0		2	2	0	0.46	0	0.46	Venom_allergen_4_1
Acetylcholinesterase-1_1	AB_RSEM.txt	TRINITY_DN38093_c0_g1_i2	5317	5040.28	1.42	0	0	0.21		15	1	0	0	0	0	Venom_allergen_5_15
Acetylcholinesterase-1_1	AB_RSEM.txt	TRINITY_DN38093_c0_g1_i3	5317	5040.28	1.42	0	0	0.21		18	4	8.44	18.39	5.89	16.25	Venom_allergen_5_1
Acetylcholinesterase-1_1	AB_RSEM.txt	TRINITY_DN38093_c0_g1_i7	967	690.28	0	0	0	0		10	0	0	0	0	0	Venom_allergen_5_2_1
Acetylcholinesterase-1_1	AB_RSEM.txt	TRINITY_DN38135_c0_g2_i2	2252	1975.28	0	0	0	0		14	0	0	0	0	0	Venom_allergen_5
Acetylcholinesterase-1_1	AB_RSEM.txt	TRINITY_DN38135_c0_g2_i6	2436	2159.28	0	0	0	0		93	31	26.09	10.95	6.42	1.98	Venom_peptide_isomerase_heavy_chain_2
Acetylcholinesterase-1_1	AB_RSEM.txt	TRINITY_DN38135_c0_g2_i8	2216	1939.28	0	0	0	0		2	2	11	0.07	10.97	0.07	Venom_protein_55
Acetylcholinesterase-1_1	AB_RSEM.txt	TRINITY_DN34158_c0_g6_i3	646	369.29	0	0	0	0		118	32	12.4	26.89	2.85	10.51	Venom_prothrombin_activator_pseutarin-C_catalytic_subunit_12
Alpha-amylase_1	AB_RSEM.txt	TRINITY_DN44359_c1_g2_i1	1663	1386.28	10162	50.48	89.95	100		24	11	2.75	4.76	1.29	1.99	Zinc_metalloproteinase@disintegrin_107
Alpha-amylase_1	AB_RSEM.txt	TRINITY_DN91533_c0_g1_i1	606	329.3	10	0.21	0.37	100		7	0	0	0	0	0	Zinc_metalloproteinase@disintegrin_4
Alpha-latroinsectotoxin-Lt1a_2	AB_RSEM.txt	TRINITY_DN44798_c3_g3_i2	3922	3645.28	21696.6	40.99	73.03	75.88		2	0	0	0	0	0	Zinc_metalloproteinase@disintegrin_5
Alpha-latroinsectotoxin-Lt1a_2	AB_RSEM.txt	TRINITY_DN37932_c0_g4_i4	2108	1831.28	2325.34	8.74	15.58	83.03		22	2	0	0	0	0	Zinc_metalloproteinase-disintegrin-like_alternagin_2
Alpha-latroinsectotoxin-Lt1a_2	AB_RSEM.txt	TRINITY_DN43205_c0_g3_i10	3014	2737.28	3394.51	8.54	15.22	90.15		7	0	0	0	0	0	Zinc_metalloproteinase-disintegrin-like_ammodytagin_1
Alpha-latroinsectotoxin-Lt1a_2	AB_RSEM.txt	TRINITY_DN43288_c0_g10_i2	3737	3460.28	4192.52	8.34	14.87	93.14		2	0	0	0	0	0	Zinc_metalloproteinase-disintegrin-like_mikarin_1
Alpha-latroinsectotoxin-Lt1a_2	AB_RSEM.txt	TRINITY_DN43784_c3_g3_i4	4536	4259.28	4766.9	7.71	13.73	16.59		30	5	1.21	6.11	0.63	3.84	Zinc_metalloproteinase-disintegrin-like_VAP2B_272
Alpha-latroinsectotoxin-Lt1a_2	AB_RSEM.txt	TRINITY_DN44885_c3_g1_i2	4923	4646.28	4700.3	6.97	12.41	33.51		10	0	0	0	0	0	Zinc_metalloproteinase_recombinant_fibrinogenase_II_1
Alpha-latroinsectotoxin-Lt1a_2	AB_RSEM.txt	TRINITY_DN43784_c3_g3_i1	4530	4253.28	3867	6.26	11.16	13.48				0.91905	7201.98	6618.98
Alpha-latroinsectotoxin-Lt1a_2	AB_RSEM.txt	TRINITY_DN43784_c3_g3_i3	3546	3269.28	2896.93	6.1	10.87	13.13		14	5	1.81	5840.81	0.89	3492.8	Venom_allergen_3_30
Alpha-latroinsectotoxin-Lt1a_2	AB_RSEM.txt	TRINITY_DN44885_c3_g1_i11	929	652.28	564.73	5.96	10.62	28.68		9	6	31.77	793.28	16.41	465.51	Cysteine-rich_venom_protein_Mr30_2
Alpha-latroinsectotoxin-Lt1a_2	AB_RSEM.txt	TRINITY_DN44767_c0_g1_i2	14365	14088.3	8701.29	4.25	7.58	35.72		58	17	15.6	35.84	6.21	29.96	Thrombin-like_enzyme_ancrod_11
Alpha-latroinsectotoxin-Lt1a_2	AB_RSEM.txt	TRINITY_DN44681_c2_g2_i2	1382	1105.28	662.68	4.13	7.36	42.38		45	45	78.95	58.76	10.61	26.05	Factor_V_activator_RVV-V_gamma_142
Alpha-latroinsectotoxin-Lt1a_2	AB_RSEM.txt	TRINITY_DN43978_c0_g1_i13	4832	4555.28	2723.6	4.12	7.34	28.58		5	5	11.05	23	5.53	19.46	Peroxiredoxin-4_1
Alpha-latroinsectotoxin-Lt1a_2	AB_RSEM.txt	TRINITY_DN44798_c3_g3_i5	3998	3721.28	2207.87	4.09	7.28	7.56		18	4	8.44	18.39	5.89	16.25	Venom_allergen_5_1
Alpha-latroinsectotoxin-Lt1a_2	AB_RSEM.txt	TRINITY_DN43951_c1_g3_i3	2290	2013.28	949.84	3.25	5.79	45.58		9	7	1.63	15.89	0.59	13.4	Disintegrin_bitistatin_6
Alpha-latroinsectotoxin-Lt1a_2	AB_RSEM.txt	TRINITY_DN42847_c2_g1_i19	2592	2315.28	1075.26	3.2	5.7	29.49		118	32	12.4	26.89	2.85	10.51	Venom_prothrombin_activator_pseutarin-C_catalytic_subunit_12
Alpha-latroinsectotoxin-Lt1a_2	AB_RSEM.txt	TRINITY_DN44798_c3_g3_i10	4094	3817.28	1749.44	3.16	5.62	5.84		12	12	9.48	8.9	1.92	6.37	Phospholipase_A2_1
Alpha-latroinsectotoxin-Lt1a_2	AB_RSEM.txt	TRINITY_DN44885_c3_g1_i13	945	668.28	304.04	3.13	5.58	15.07		8	8	2.61	13.32	1.42	5.42	Hyaluronidase_1
Alpha-latroinsectotoxin-Lt1a_2	AB_RSEM.txt	TRINITY_DN43978_c0_g1_i2	7065	6788.28	3007.25	3.05	5.44	21.17		30	5	1.21	6.11	0.63	3.84	Zinc_metalloproteinase-disintegrin-like_VAP2B_272
Alpha-latroinsectotoxin-Lt1a_2	AB_RSEM.txt	TRINITY_DN37932_c0_g1_i1	663	386.29	152	2.71	4.83	100		24	11	2.75	4.76	1.29	1.99	Zinc_metalloproteinase@disintegrin_107
Alpha-latroinsectotoxin-Lt1a_2	AB_RSEM.txt	TRINITY_DN44887_c1_g1_i13	2380	2103.28	777.31	2.55	4.53	46.89		8	8	2.92	2.31	1.02	1.14	KappaPI-theraphotoxin-Hs1a_80
Alpha-latroinsectotoxin-Lt1a_2	AB_RSEM.txt	TRINITY_DN37803_c0_g2_i4	2188	1911.28	668.92	2.41	4.29	82.43		10	1	0	0.87	0	0.87	Kunitz-type_serine_protease_inhibitor_As-fr-19_1
Alpha-latroinsectotoxin-Lt1a_2	AB_RSEM.txt	TRINITY_DN41883_c4_g1_i1	1006	729.28	246.05	2.32	4.14	23.08		11	4	0.52	1	0.27	0.69	Snake_venom_metalloproteinase_Ac1_1
Alpha-latroinsectotoxin-Lt1a_2	AB_RSEM.txt	TRINITY_DN43978_c0_g1_i22	7245	6968.28	2322.4	2.3	4.09	15.93		18	1	0.24	0.64	0.24	0.64	Thrombin-like_enzyme_TLBm_1
Alpha-latroinsectotoxin-Lt1a_2	AB_RSEM.txt	TRINITY_DN44347_c0_g2_i17	2612	2335.28	778.49	2.3	4.09	13.46		2	2	0	0.46	0	0.46	Venom_allergen_4_1
Alpha-latroinsectotoxin-Lt1a_2	AB_RSEM.txt	TRINITY_DN41713_c1_g2_i3	2294	2017.28	646.18	2.21	3.93	42.55
Alpha-latroinsectotoxin-Lt1a_2	AB_RSEM.txt	TRINITY_DN41713_c1_g2_i9	1683	1406.28	447.38	2.19	3.9	42.26
Alpha-latroinsectotoxin-Lt1a_2	AB_RSEM.txt	TRINITY_DN34810_c0_g1_i1	967	690.28	211.23	2.11	3.75	74.66
Alpha-latroinsectotoxin-Lt1a_2	AB_RSEM.txt	TRINITY_DN44798_c3_g3_i9	3999	3722.28	1112.79	2.06	3.67	3.81
Alpha-latroinsectotoxin-Lt1a_2	AB_RSEM.txt	TRINITY_DN42748_c0_g1_i14	2997	2720.28	781.3	1.98	3.52	78.99
Alpha-latroinsectotoxin-Lt1a_2	AB_RSEM.txt	TRINITY_DN44347_c0_g12_i1	774	497.28	139.57	1.93	3.44	100
Alpha-latroinsectotoxin-Lt1a_2	AB_RSEM.txt	TRINITY_DN41834_c0_g1_i1	979	702.28	192.72	1.89	3.37	88.82
Alpha-latroinsectotoxin-Lt1a_2	AB_RSEM.txt	TRINITY_DN44347_c0_g6_i2	636	359.29	97	1.86	3.31	100
Alpha-latroinsectotoxin-Lt1a_2	AB_RSEM.txt	TRINITY_DN42847_c2_g1_i9	2997	2720.28	731.24	1.85	3.3	17.07
Alpha-latroinsectotoxin-Lt1a_2	AB_RSEM.txt	TRINITY_DN41883_c4_g1_i15	2821	2544.28	657.55	1.78	3.17	17.68
Alpha-latroinsectotoxin-Lt1a_2	AB_RSEM.txt	TRINITY_DN41883_c4_g1_i3	3852	3575.28	906.26	1.75	3.11	17.34
Alpha-latroinsectotoxin-Lt1a_2	AB_RSEM.txt	TRINITY_DN54731_c0_g1_i1	391	114.9	29	1.74	3.1	100
Alpha-latroinsectotoxin-Lt1a_2	AB_RSEM.txt	TRINITY_DN29161_c0_g1_i1	721	444.28	104	1.61	2.87	100
Alpha-latroinsectotoxin-Lt1a_2	AB_RSEM.txt	TRINITY_DN39265_c2_g1_i3	986	709.28	159.11	1.54	2.75	80.2
Alpha-latroinsectotoxin-Lt1a_2	AB_RSEM.txt	TRINITY_DN44885_c3_g1_i3	5074	4797.28	1044.57	1.5	2.67	7.21
Alpha-latroinsectotoxin-Lt1a_2	AB_RSEM.txt	TRINITY_DN44347_c0_g2_i14	2826	2549.28	546.72	1.48	2.63	8.66
Alpha-latroinsectotoxin-Lt1a_2	AB_RSEM.txt	TRINITY_DN41883_c4_g1_i6	3855	3578.28	713.92	1.37	2.45	13.65
Alpha-latroinsectotoxin-Lt1a_2	AB_RSEM.txt	TRINITY_DN43395_c0_g6_i3	2677	2400.28	465.93	1.34	2.38	9.45
Alpha-latroinsectotoxin-Lt1a_2	AB_RSEM.txt	TRINITY_DN42544_c1_g4_i3	1341	1064.28	189.97	1.23	2.19	48.31
Alpha-latroinsectotoxin-Lt1a_2	AB_RSEM.txt	TRINITY_DN43295_c1_g10_i1	892	615.28	107.63	1.2	2.15	93.16
Alpha-latroinsectotoxin-Lt1a_2	AB_RSEM.txt	TRINITY_DN44767_c0_g1_i3	14433	14156.3	2212.34	1.08	1.92	9.04
Alpha-latroinsectotoxin-Lt1a_2	AB_RSEM.txt	TRINITY_DN42544_c1_g4_i4	1874	1597.28	245.67	1.06	1.89	41.63
Alpha-latroinsectotoxin-Lt1a_2	AB_RSEM.txt	TRINITY_DN44347_c0_g5_i2	362	87.66	13	1.02	1.82	100
Alpha-latroinsectotoxin-Lt1a_2	AB_RSEM.txt	TRINITY_DN37932_c0_g4_i2	2194	1917.28	284.4	1.02	1.82	9.7
Alpha-latroinsectotoxin-Lt1a_2	AB_RSEM.txt	TRINITY_DN41883_c4_g1_i9	2817	2540.28	374.18	1.01	1.81	10.08
Alpha-latroinsectotoxin-Lt1a_2	AB_RSEM.txt	TRINITY_DN43327_c1_g8_i1	1328	1051.28	151.29	0.99	1.77	91.02
Alpha-latroinsectotoxin-Lt1a_2	AB_RSEM.txt	TRINITY_DN4496_c0_g1_i1	925	648.28	91	0.97	1.72	100
Alpha-latroinsectotoxin-Lt1a_2	AB_RSEM.txt	TRINITY_DN43978_c0_g1_i21	7477	7200.28	1007.73	0.96	1.72	6.69
Alpha-latroinsectotoxin-Lt1a_2	AB_RSEM.txt	TRINITY_DN43901_c0_g8_i2	582	305.31	42.26	0.95	1.7	61.48
Alpha-latroinsectotoxin-Lt1a_2	AB_RSEM.txt	TRINITY_DN42847_c2_g1_i6	3177	2900.28	396.55	0.94	1.68	8.68
Alpha-latroinsectotoxin-Lt1a_2	AB_RSEM.txt	TRINITY_DN43978_c0_g1_i11	2735	2458.28	329.39	0.92	1.64	6.4
Alpha-latroinsectotoxin-Lt1a_2	AB_RSEM.txt	TRINITY_DN43978_c0_g1_i8	7506	7229.28	923.38	0.88	1.57	6.1
Alpha-latroinsectotoxin-Lt1a_2	AB_RSEM.txt	TRINITY_DN41057_c1_g1_i1	4387	4110.28	492.39	0.83	1.47	56.18
Alpha-latroinsectotoxin-Lt1a_2	AB_RSEM.txt	TRINITY_DN43978_c0_g1_i24	7007	6730.28	787.77	0.81	1.44	5.59
Alpha-latroinsectotoxin-Lt1a_2	AB_RSEM.txt	TRINITY_DN44347_c0_g2_i16	1475	1198.28	140.72	0.81	1.44	4.74
Alpha-latroinsectotoxin-Lt1a_2	AB_RSEM.txt	TRINITY_DN42503_c0_g1_i8	6107	5830.28	686.97	0.81	1.45	6.12
Alpha-latroinsectotoxin-Lt1a_2	AB_RSEM.txt	TRINITY_DN43901_c0_g7_i1	1044	767.28	89	0.8	1.42	100
Alpha-latroinsectotoxin-Lt1a_2	AB_RSEM.txt	TRINITY_DN37932_c0_g4_i5	2177	1900.28	211.26	0.77	1.36	7.27
Alpha-latroinsectotoxin-Lt1a_2	AB_RSEM.txt	TRINITY_DN41788_c0_g3_i1	970	693.28	76	0.75	1.35	100
Alpha-latroinsectotoxin-Lt1a_2	AB_RSEM.txt	TRINITY_DN42847_c2_g1_i1	2906	2629.28	281.43	0.74	1.31	6.8
Alpha-latroinsectotoxin-Lt1a_2	AB_RSEM.txt	TRINITY_DN44347_c0_g2_i5	2580	2303.28	244.1	0.73	1.3	4.28
Alpha-latroinsectotoxin-Lt1a_2	AB_RSEM.txt	TRINITY_DN44798_c3_g3_i12	4018	3741.28	375.75	0.69	1.23	1.28
Alpha-latroinsectotoxin-Lt1a_2	AB_RSEM.txt	TRINITY_DN41883_c4_g1_i2	3950	3673.28	351.2	0.66	1.17	6.54
Alpha-latroinsectotoxin-Lt1a_2	AB_RSEM.txt	TRINITY_DN41057_c1_g1_i2	4307	4030.28	376.61	0.64	1.15	43.82
Alpha-latroinsectotoxin-Lt1a_2	AB_RSEM.txt	TRINITY_DN42847_c2_g1_i2	2683	2406.28	219.22	0.63	1.12	5.79
Alpha-latroinsectotoxin-Lt1a_2	AB_RSEM.txt	TRINITY_DN43969_c0_g3_i4	2929	2652.28	234.3	0.61	1.08	13.24
Alpha-latroinsectotoxin-Lt1a_2	AB_RSEM.txt	TRINITY_DN44741_c0_g1_i5	1638	1361.28	118.78	0.6	1.07	12.85
Alpha-latroinsectotoxin-Lt1a_2	AB_RSEM.txt	TRINITY_DN70452_c0_g1_i1	428	151.4	13	0.59	1.05	100
Alpha-latroinsectotoxin-Lt1a_2	AB_RSEM.txt	TRINITY_DN19201_c0_g1_i1	550	273.32	23	0.58	1.03	100
Alpha-latroinsectotoxin-Lt1a_2	AB_RSEM.txt	TRINITY_DN43784_c3_g3_i2	3582	3305.28	272.17	0.57	1.01	1.22
Alpha-latroinsectotoxin-Lt1a_2	AB_RSEM.txt	TRINITY_DN41713_c1_g2_i4	2009	1732.28	138.15	0.55	0.98	10.59
Alpha-latroinsectotoxin-Lt1a_2	AB_RSEM.txt	TRINITY_DN44798_c3_g3_i6	4044	3767.28	280.78	0.51	0.91	0.95
Alpha-latroinsectotoxin-Lt1a_2	AB_RSEM.txt	TRINITY_DN32779_c0_g1_i1	1026	749.28	53	0.49	0.87	100
Alpha-latroinsectotoxin-Lt1a_2	AB_RSEM.txt	TRINITY_DN39358_c1_g1_i16	999	722.28	49.82	0.48	0.85	27.82
Alpha-latroinsectotoxin-Lt1a_2	AB_RSEM.txt	TRINITY_DN43395_c0_g6_i5	2955	2678.28	181.42	0.47	0.83	3.3
Alpha-latroinsectotoxin-Lt1a_2	AB_RSEM.txt	TRINITY_DN41883_c4_g1_i7	3953	3676.28	245.69	0.46	0.82	4.57
Alpha-latroinsectotoxin-Lt1a_2	AB_RSEM.txt	TRINITY_DN42847_c2_g1_i24	775	498.28	33.5	0.46	0.83	4.27
Alpha-latroinsectotoxin-Lt1a_2	AB_RSEM.txt	TRINITY_DN39358_c1_g1_i6	4619	4342.28	276.35	0.44	0.78	25.67
Alpha-latroinsectotoxin-Lt1a_2	AB_RSEM.txt	TRINITY_DN37803_c0_g2_i1	2262	1985.28	119.64	0.42	0.74	14.19
Alpha-latroinsectotoxin-Lt1a_2	AB_RSEM.txt	TRINITY_DN44887_c1_g1_i6	1808	1531.28	93.27	0.42	0.75	7.73
Alpha-latroinsectotoxin-Lt1a_2	AB_RSEM.txt	TRINITY_DN39210_c0_g1_i3	2436	2159.28	129	0.41	0.73	100
Alpha-latroinsectotoxin-Lt1a_2	AB_RSEM.txt	TRINITY_DN44885_c3_g1_i10	1045	768.28	43.05	0.39	0.69	1.86
Alpha-latroinsectotoxin-Lt1a_2	AB_RSEM.txt	TRINITY_DN43533_c0_g2_i4	1295	1018.28	56.03	0.38	0.68	56.99
Alpha-latroinsectotoxin-Lt1a_2	AB_RSEM.txt	TRINITY_DN43205_c0_g3_i25	3104	2827.28	154.68	0.38	0.67	3.98
Alpha-latroinsectotoxin-Lt1a_2	AB_RSEM.txt	TRINITY_DN43978_c0_g1_i17	7738	7461.28	396.15	0.37	0.65	2.54
Alpha-latroinsectotoxin-Lt1a_2	AB_RSEM.txt	TRINITY_DN39358_c1_g1_i12	2068	1791.28	92.38	0.36	0.63	20.8
Alpha-latroinsectotoxin-Lt1a_2	AB_RSEM.txt	TRINITY_DN43901_c0_g8_i9	308	44.26	2	0.31	0.55	20.07
Alpha-latroinsectotoxin-Lt1a_2	AB_RSEM.txt	TRINITY_DN39965_c0_g2_i1	1290	1013.28	45.96	0.31	0.56	99.92
Alpha-latroinsectotoxin-Lt1a_2	AB_RSEM.txt	TRINITY_DN44347_c0_g2_i11	2721	2444.28	108.94	0.31	0.55	1.8
Alpha-latroinsectotoxin-Lt1a_2	AB_RSEM.txt	TRINITY_DN39831_c0_g1_i4	4094	3817.28	158	0.29	0.51	100
Alpha-latroinsectotoxin-Lt1a_2	AB_RSEM.txt	TRINITY_DN43205_c0_g3_i3	3115	2838.28	115.58	0.28	0.5	2.96
Alpha-latroinsectotoxin-Lt1a_2	AB_RSEM.txt	TRINITY_DN44681_c2_g2_i1	974	697.28	27.32	0.27	0.48	2.77
Alpha-latroinsectotoxin-Lt1a_2	AB_RSEM.txt	TRINITY_DN43978_c0_g1_i16	692	415.29	16.33	0.27	0.48	1.88
Alpha-latroinsectotoxin-Lt1a_2	AB_RSEM.txt	TRINITY_DN43978_c0_g1_i3	1654	1377.28	54.78	0.27	0.49	1.9
Alpha-latroinsectotoxin-Lt1a_2	AB_RSEM.txt	TRINITY_DN44347_c0_g2_i8	2233	1956.28	75.35	0.27	0.47	1.56
Alpha-latroinsectotoxin-Lt1a_2	AB_RSEM.txt	TRINITY_DN43189_c0_g3_i2	703	426.28	16	0.26	0.46	100
Alpha-latroinsectotoxin-Lt1a_2	AB_RSEM.txt	TRINITY_DN42544_c1_g4_i1	2169	1892.28	70.36	0.26	0.46	10.06
Alpha-latroinsectotoxin-Lt1a_2	AB_RSEM.txt	TRINITY_DN42748_c0_g1_i6	3081	2804.28	103.22	0.25	0.45	10.12
Alpha-latroinsectotoxin-Lt1a_2	AB_RSEM.txt	TRINITY_DN39265_c2_g1_i4	1174	897.28	31.51	0.24	0.43	12.56
Alpha-latroinsectotoxin-Lt1a_2	AB_RSEM.txt	TRINITY_DN43822_c0_g2_i2	1157	880.28	31	0.24	0.43	100
Alpha-latroinsectotoxin-Lt1a_2	AB_RSEM.txt	TRINITY_DN39358_c1_g1_i3	4370	4093.28	134.3	0.23	0.4	13.23
Alpha-latroinsectotoxin-Lt1a_2	AB_RSEM.txt	TRINITY_DN41883_c4_g1_i10	1233	956.28	32.62	0.23	0.42	2.33
Alpha-latroinsectotoxin-Lt1a_2	AB_RSEM.txt	TRINITY_DN44798_c3_g3_i14	4075	3798.28	124.19	0.23	0.4	0.42
Alpha-latroinsectotoxin-Lt1a_2	AB_RSEM.txt	TRINITY_DN43533_c0_g2_i1	795	518.28	15.71	0.21	0.37	31.4
Alpha-latroinsectotoxin-Lt1a_2	AB_RSEM.txt	TRINITY_DN37862_c0_g1_i7	3973	3696.28	109.7	0.2	0.36	35.25
Alpha-latroinsectotoxin-Lt1a_2	AB_RSEM.txt	TRINITY_DN44885_c3_g1_i12	2258	1981.28	57.98	0.2	0.36	0.97
Alpha-latroinsectotoxin-Lt1a_2	AB_RSEM.txt	TRINITY_DN41713_c1_g2_i1	2742	2465.28	69.78	0.19	0.35	3.76
Alpha-latroinsectotoxin-Lt1a_2	AB_RSEM.txt	TRINITY_DN39657_c0_g1_i7	1643	1366.28	37.25	0.19	0.33	8.32
Alpha-latroinsectotoxin-Lt1a_2	AB_RSEM.txt	TRINITY_DN37862_c0_g1_i1	3577	3300.28	84.57	0.18	0.31	30.44
Alpha-latroinsectotoxin-Lt1a_2	AB_RSEM.txt	TRINITY_DN42503_c0_g1_i4	3462	3185.28	82.36	0.18	0.32	1.34
Alpha-latroinsectotoxin-Lt1a_2	AB_RSEM.txt	TRINITY_DN42503_c0_g1_i10	3462	3185.28	82.36	0.18	0.32	1.34
Alpha-latroinsectotoxin-Lt1a_2	AB_RSEM.txt	TRINITY_DN33960_c0_g1_i1	2527	2250.28	54	0.17	0.29	100
Alpha-latroinsectotoxin-Lt1a_2	AB_RSEM.txt	TRINITY_DN44885_c3_g1_i1	4879	4602.28	116.85	0.17	0.31	0.84
Alpha-latroinsectotoxin-Lt1a_2	AB_RSEM.txt	TRINITY_DN39657_c0_g1_i3	1194	917.28	22.75	0.17	0.3	7.57
Alpha-latroinsectotoxin-Lt1a_2	AB_RSEM.txt	TRINITY_DN43978_c0_g1_i1	1687	1410.28	32.96	0.16	0.29	1.12
Alpha-latroinsectotoxin-Lt1a_2	AB_RSEM.txt	TRINITY_DN43637_c1_g3_i2	630	353.29	7.68	0.15	0.27	10.59
Alpha-latroinsectotoxin-Lt1a_2	AB_RSEM.txt	TRINITY_DN41883_c4_g1_i14	2190	1913.28	40.95	0.15	0.26	1.46
Alpha-latroinsectotoxin-Lt1a_2	AB_RSEM.txt	TRINITY_DN19924_c0_g1_i1	1124	847.28	19	0.15	0.28	100
Alpha-latroinsectotoxin-Lt1a_2	AB_RSEM.txt	TRINITY_DN43901_c0_g8_i8	1054	777.28	14.44	0.13	0.23	8.25
Alpha-latroinsectotoxin-Lt1a_2	AB_RSEM.txt	TRINITY_DN43205_c0_g3_i16	2400	2123.28	39.91	0.13	0.23	1.37
Alpha-latroinsectotoxin-Lt1a_2	AB_RSEM.txt	TRINITY_DN43822_c0_g5_i1	1518	1241.28	22.94	0.13	0.23	30.2
Alpha-latroinsectotoxin-Lt1a_2	AB_RSEM.txt	TRINITY_DN42748_c0_g1_i4	3158	2881.28	49.97	0.12	0.21	4.77
Alpha-latroinsectotoxin-Lt1a_2	AB_RSEM.txt	TRINITY_DN44885_c3_g1_i9	4989	4712.28	83.8	0.12	0.22	0.59
Alpha-latroinsectotoxin-Lt1a_2	AB_RSEM.txt	TRINITY_DN39358_c1_g1_i11	4554	4277.28	69.26	0.11	0.2	6.53
Alpha-latroinsectotoxin-Lt1a_2	AB_RSEM.txt	TRINITY_DN41883_c4_g1_i12	1032	755.28	12.23	0.11	0.2	1.11
Alpha-latroinsectotoxin-Lt1a_2	AB_RSEM.txt	TRINITY_DN42503_c0_g1_i3	6186	5909.28	95.12	0.11	0.2	0.84
Alpha-latroinsectotoxin-Lt1a_2	AB_RSEM.txt	TRINITY_DN43822_c0_g5_i6	1594	1317.28	20.06	0.1	0.19	24.87
Alpha-latroinsectotoxin-Lt1a_2	AB_RSEM.txt	TRINITY_DN43395_c0_g6_i7	2811	2534.28	37.48	0.1	0.18	0.72
Alpha-latroinsectotoxin-Lt1a_2	AB_RSEM.txt	TRINITY_DN44741_c0_g1_i11	3822	3545.28	51.64	0.1	0.18	2.15
Alpha-latroinsectotoxin-Lt1a_2	AB_RSEM.txt	TRINITY_DN43295_c1_g10_i2	2019	1742.28	21.99	0.09	0.15	6.72
Alpha-latroinsectotoxin-Lt1a_2	AB_RSEM.txt	TRINITY_DN44140_c1_g1_i3	520	243.33	3.13	0.09	0.16	10.49
Alpha-latroinsectotoxin-Lt1a_2	AB_RSEM.txt	TRINITY_DN37862_c0_g1_i5	3829	3552.28	46.09	0.09	0.16	15.41
Alpha-latroinsectotoxin-Lt1a_2	AB_RSEM.txt	TRINITY_DN43533_c0_g2_i3	1371	1094.28	12.26	0.08	0.14	11.6
Alpha-latroinsectotoxin-Lt1a_2	AB_RSEM.txt	TRINITY_DN43978_c0_g1_i7	1265	988.28	11.48	0.08	0.14	0.56
Alpha-latroinsectotoxin-Lt1a_2	AB_RSEM.txt	TRINITY_DN39358_c1_g1_i4	4616	4339.28	50.26	0.08	0.14	4.67
Alpha-latroinsectotoxin-Lt1a_2	AB_RSEM.txt	TRINITY_DN44741_c0_g1_i10	1364	1087.28	10.42	0.07	0.12	1.41
Alpha-latroinsectotoxin-Lt1a_2	AB_RSEM.txt	TRINITY_DN42847_c2_g1_i13	866	589.28	6.33	0.07	0.13	0.68
Alpha-latroinsectotoxin-Lt1a_2	AB_RSEM.txt	TRINITY_DN42847_c2_g1_i16	3101	2824.28	29.82	0.07	0.13	0.67
Alpha-latroinsectotoxin-Lt1a_2	AB_RSEM.txt	TRINITY_DN42847_c2_g1_i5	2709	2432.28	26.2	0.07	0.13	0.68
Alpha-latroinsectotoxin-Lt1a_2	AB_RSEM.txt	TRINITY_DN43288_c0_g10_i3	1562	1285.28	11.32	0.06	0.11	0.68
Alpha-latroinsectotoxin-Lt1a_2	AB_RSEM.txt	TRINITY_DN37803_c0_g2_i3	2263	1986.28	16.95	0.06	0.1	2.01
Alpha-latroinsectotoxin-Lt1a_2	AB_RSEM.txt	TRINITY_DN42847_c2_g1_i23	3086	2809.28	26.24	0.06	0.11	0.59
Alpha-latroinsectotoxin-Lt1a_2	AB_RSEM.txt	TRINITY_DN44798_c3_g3_i4	4010	3733.28	29.53	0.05	0.1	0.1
Alpha-latroinsectotoxin-Lt1a_2	AB_RSEM.txt	TRINITY_DN43978_c0_g1_i19	7885	7608.28	43.8	0.04	0.07	0.28
Alpha-latroinsectotoxin-Lt1a_2	AB_RSEM.txt	TRINITY_DN37803_c0_g2_i6	2259	1982.28	11.49	0.04	0.07	1.37
Alpha-latroinsectotoxin-Lt1a_2	AB_RSEM.txt	TRINITY_DN37862_c0_g1_i2	4225	3948.28	25.45	0.04	0.08	7.65
Alpha-latroinsectotoxin-Lt1a_2	AB_RSEM.txt	TRINITY_DN37862_c0_g1_i8	4069	3792.28	19.45	0.04	0.06	6.09
Alpha-latroinsectotoxin-Lt1a_2	AB_RSEM.txt	TRINITY_DN44347_c0_g2_i6	2405	2128.28	13.11	0.04	0.08	0.25
Alpha-latroinsectotoxin-Lt1a_2	AB_RSEM.txt	TRINITY_DN44885_c3_g1_i5	5008	4731.28	25.33	0.04	0.07	0.18
Alpha-latroinsectotoxin-Lt1a_2	AB_RSEM.txt	TRINITY_DN42847_c2_g1_i21	2800	2523.28	14.31	0.04	0.07	0.36
Alpha-latroinsectotoxin-Lt1a_2	AB_RSEM.txt	TRINITY_DN37862_c0_g1_i4	3673	3396.28	14.75	0.03	0.05	5.16
Alpha-latroinsectotoxin-Lt1a_2	AB_RSEM.txt	TRINITY_DN42847_c2_g1_i17	2863	2586.28	11.51	0.03	0.05	0.28
Alpha-latroinsectotoxin-Lt1a_2	AB_RSEM.txt	TRINITY_DN41713_c1_g2_i2	2432	2155.28	6.18	0.02	0.04	0.38
Alpha-latroinsectotoxin-Lt1a_2	AB_RSEM.txt	TRINITY_DN41713_c1_g2_i8	2377	2100.28	7.33	0.02	0.04	0.46
Alpha-latroinsectotoxin-Lt1a_2	AB_RSEM.txt	TRINITY_DN39358_c1_g1_i13	4551	4274.28	13.65	0.02	0.04	1.29
Alpha-latroinsectotoxin-Lt1a_2	AB_RSEM.txt	TRINITY_DN43978_c0_g1_i18	1940	1663.28	1.58	0.01	0.01	0.05
Alpha-latroinsectotoxin-Lt1a_2	AB_RSEM.txt	TRINITY_DN43205_c0_g3_i15	3205	2928.28	4.47	0.01	0.02	0.11
Alpha-latroinsectotoxin-Lt1a_2	AB_RSEM.txt	TRINITY_DN44798_c3_g3_i7	4086	3809.28	3.66	0.01	0.01	0.01
Alpha-latroinsectotoxin-Lt1a_2	AB_RSEM.txt	TRINITY_DN70491_c0_g1_i1	852	575.28	1	0.01	0.02	100
Alpha-latroinsectotoxin-Lt1a_2	AB_RSEM.txt	TRINITY_DN70491_c0_g2_i1	852	575.28	1	0.01	0.02	100
Alpha-latroinsectotoxin-Lt1a_2	AB_RSEM.txt	TRINITY_DN42847_c2_g1_i11	3010	2733.28	3.43	0.01	0.02	0.08
Alpha-latroinsectotoxin-Lt1a_2	AB_RSEM.txt	TRINITY_DN42847_c2_g1_i22	2772	2495.28	3.49	0.01	0.02	0.09
Alpha-latroinsectotoxin-Lt1a_2	AB_RSEM.txt	TRINITY_DN39210_c0_g1_i1	2478	2201.28	0	0	0	0
Alpha-latroinsectotoxin-Lt1a_2	AB_RSEM.txt	TRINITY_DN41713_c1_g2_i5	2687	2410.28	0	0	0	0
Alpha-latroinsectotoxin-Lt1a_2	AB_RSEM.txt	TRINITY_DN41713_c1_g2_i6	1993	1716.28	0	0	0	0
Alpha-latroinsectotoxin-Lt1a_2	AB_RSEM.txt	TRINITY_DN41713_c1_g2_i7	2604	2327.28	0	0	0	0
Alpha-latroinsectotoxin-Lt1a_2	AB_RSEM.txt	TRINITY_DN43978_c0_g1_i10	909	632.28	0	0	0	0
Alpha-latroinsectotoxin-Lt1a_2	AB_RSEM.txt	TRINITY_DN43978_c0_g1_i12	7812	7535.28	0	0	0	0
Alpha-latroinsectotoxin-Lt1a_2	AB_RSEM.txt	TRINITY_DN43978_c0_g1_i14	7580	7303.28	0	0	0	0
Alpha-latroinsectotoxin-Lt1a_2	AB_RSEM.txt	TRINITY_DN43978_c0_g1_i15	1431	1154.28	0	0	0	0
Alpha-latroinsectotoxin-Lt1a_2	AB_RSEM.txt	TRINITY_DN43978_c0_g1_i20	460	183.36	0	0	0	0
Alpha-latroinsectotoxin-Lt1a_2	AB_RSEM.txt	TRINITY_DN43978_c0_g1_i23	942	665.28	0	0	0	0
Alpha-latroinsectotoxin-Lt1a_2	AB_RSEM.txt	TRINITY_DN43978_c0_g1_i25	1298	1021.28	0	0	0	0
Alpha-latroinsectotoxin-Lt1a_2	AB_RSEM.txt	TRINITY_DN43978_c0_g1_i5	1398	1121.28	0	0	0	0
Alpha-latroinsectotoxin-Lt1a_2	AB_RSEM.txt	TRINITY_DN43901_c0_g5_i2	345	72.73	0	0	0	0
Alpha-latroinsectotoxin-Lt1a_2	AB_RSEM.txt	TRINITY_DN43901_c0_g7_i2	902	625.28	0	0	0	0
Alpha-latroinsectotoxin-Lt1a_2	AB_RSEM.txt	TRINITY_DN43901_c0_g8_i4	843	566.28	0	0	0	0
Alpha-latroinsectotoxin-Lt1a_2	AB_RSEM.txt	TRINITY_DN43951_c1_g3_i5	1307	1030.28	0	0	0	0
Alpha-latroinsectotoxin-Lt1a_2	AB_RSEM.txt	TRINITY_DN43969_c0_g2_i1	360	85.86	0	0	0	0
Alpha-latroinsectotoxin-Lt1a_2	AB_RSEM.txt	TRINITY_DN39965_c0_g2_i2	1291	1014.28	0.04	0	0	0.08
Alpha-latroinsectotoxin-Lt1a_2	AB_RSEM.txt	TRINITY_DN43288_c0_g10_i5	1678	1401.28	0	0	0	0
Alpha-latroinsectotoxin-Lt1a_2	AB_RSEM.txt	TRINITY_DN43288_c0_g10_i7	1518	1241.28	0	0	0	0
Alpha-latroinsectotoxin-Lt1a_2	AB_RSEM.txt	TRINITY_DN43288_c0_g10_i8	4008	3731.28	0	0	0	0
Alpha-latroinsectotoxin-Lt1a_2	AB_RSEM.txt	TRINITY_DN43288_c0_g10_i10	1789	1512.28	0	0	0	0
Alpha-latroinsectotoxin-Lt1a_2	AB_RSEM.txt	TRINITY_DN43205_c0_g3_i1	3104	2827.28	0.01	0	0	0
Alpha-latroinsectotoxin-Lt1a_2	AB_RSEM.txt	TRINITY_DN43205_c0_g3_i11	3169	2892.28	0	0	0	0
Alpha-latroinsectotoxin-Lt1a_2	AB_RSEM.txt	TRINITY_DN43205_c0_g3_i12	2400	2123.28	0	0	0	0
Alpha-latroinsectotoxin-Lt1a_2	AB_RSEM.txt	TRINITY_DN43205_c0_g3_i13	3056	2779.28	0	0	0	0
Alpha-latroinsectotoxin-Lt1a_2	AB_RSEM.txt	TRINITY_DN43205_c0_g3_i14	3230	2953.28	0	0	0	0
Alpha-latroinsectotoxin-Lt1a_2	AB_RSEM.txt	TRINITY_DN43205_c0_g3_i17	3385	3108.28	0	0	0	0
Alpha-latroinsectotoxin-Lt1a_2	AB_RSEM.txt	TRINITY_DN43205_c0_g3_i18	3295	3018.28	0	0	0	0
Alpha-latroinsectotoxin-Lt1a_2	AB_RSEM.txt	TRINITY_DN43205_c0_g3_i19	3259	2982.28	0	0	0	0
Alpha-latroinsectotoxin-Lt1a_2	AB_RSEM.txt	TRINITY_DN43205_c0_g3_i30	3211	2934.28	0	0	0	0
Alpha-latroinsectotoxin-Lt1a_2	AB_RSEM.txt	TRINITY_DN43205_c0_g3_i4	3146	2869.28	0	0	0	0
Alpha-latroinsectotoxin-Lt1a_2	AB_RSEM.txt	TRINITY_DN43205_c0_g3_i5	3259	2982.28	0	0	0	0
Alpha-latroinsectotoxin-Lt1a_2	AB_RSEM.txt	TRINITY_DN43205_c0_g3_i6	3272	2995.28	0	0	0	0
Alpha-latroinsectotoxin-Lt1a_2	AB_RSEM.txt	TRINITY_DN43205_c0_g3_i7	3247	2970.28	0	0	0	0
Alpha-latroinsectotoxin-Lt1a_2	AB_RSEM.txt	TRINITY_DN43205_c0_g3_i8	3157	2880.28	0	0	0	0
Alpha-latroinsectotoxin-Lt1a_2	AB_RSEM.txt	TRINITY_DN43205_c0_g3_i9	3146	2869.28	0	0	0	0
Alpha-latroinsectotoxin-Lt1a_2	AB_RSEM.txt	TRINITY_DN43205_c0_g3_i20	3056	2779.28	0	0	0	0
Alpha-latroinsectotoxin-Lt1a_2	AB_RSEM.txt	TRINITY_DN43205_c0_g3_i21	3182	2905.28	0	0	0	0
Alpha-latroinsectotoxin-Lt1a_2	AB_RSEM.txt	TRINITY_DN43205_c0_g3_i23	3140	2863.28	0	0	0	0
Alpha-latroinsectotoxin-Lt1a_2	AB_RSEM.txt	TRINITY_DN43205_c0_g3_i24	3014	2737.28	0.14	0	0	0
Alpha-latroinsectotoxin-Lt1a_2	AB_RSEM.txt	TRINITY_DN43205_c0_g3_i27	3211	2934.28	0	0	0	0
Alpha-latroinsectotoxin-Lt1a_2	AB_RSEM.txt	TRINITY_DN43205_c0_g3_i28	3270	2993.28	0	0	0	0
Alpha-latroinsectotoxin-Lt1a_2	AB_RSEM.txt	TRINITY_DN43205_c0_g3_i29	3169	2892.28	0	0	0	0
Alpha-latroinsectotoxin-Lt1a_2	AB_RSEM.txt	TRINITY_DN43295_c1_g10_i3	2020	1743.28	0.38	0	0	0.12
Alpha-latroinsectotoxin-Lt1a_2	AB_RSEM.txt	TRINITY_DN43295_c1_g10_i4	892	615.28	0	0	0	0
Alpha-latroinsectotoxin-Lt1a_2	AB_RSEM.txt	TRINITY_DN43822_c0_g5_i2	824	547.28	0	0	0	0
Alpha-latroinsectotoxin-Lt1a_2	AB_RSEM.txt	TRINITY_DN43822_c0_g5_i3	1732	1455.28	0	0	0	0
Alpha-latroinsectotoxin-Lt1a_2	AB_RSEM.txt	TRINITY_DN43822_c0_g5_i5	1656	1379.28	0	0	0	0
Alpha-latroinsectotoxin-Lt1a_2	AB_RSEM.txt	TRINITY_DN44140_c1_g1_i2	521	244.33	0	0	0	0
Alpha-latroinsectotoxin-Lt1a_2	AB_RSEM.txt	TRINITY_DN43189_c0_g3_i3	718	441.28	0	0	0	0
Alpha-latroinsectotoxin-Lt1a_2	AB_RSEM.txt	TRINITY_DN39358_c1_g1_i1	4379	4102.28	0	0	0	0
Alpha-latroinsectotoxin-Lt1a_2	AB_RSEM.txt	TRINITY_DN39358_c1_g1_i10	4387	4110.28	0	0	0	0
Alpha-latroinsectotoxin-Lt1a_2	AB_RSEM.txt	TRINITY_DN39358_c1_g1_i14	934	657.28	0	0	0	0
Alpha-latroinsectotoxin-Lt1a_2	AB_RSEM.txt	TRINITY_DN39358_c1_g1_i15	4683	4406.28	0	0	0	0
Alpha-latroinsectotoxin-Lt1a_2	AB_RSEM.txt	TRINITY_DN39358_c1_g1_i2	4745	4468.28	0	0	0	0
Alpha-latroinsectotoxin-Lt1a_2	AB_RSEM.txt	TRINITY_DN39358_c1_g1_i5	4508	4231.28	0	0	0	0
Alpha-latroinsectotoxin-Lt1a_2	AB_RSEM.txt	TRINITY_DN39358_c1_g1_i7	4748	4471.28	0	0	0	0
Alpha-latroinsectotoxin-Lt1a_2	AB_RSEM.txt	TRINITY_DN39358_c1_g1_i8	4680	4403.28	0	0	0	0
Alpha-latroinsectotoxin-Lt1a_2	AB_RSEM.txt	TRINITY_DN39358_c1_g1_i9	2197	1920.28	0	0	0	0
Alpha-latroinsectotoxin-Lt1a_2	AB_RSEM.txt	TRINITY_DN43327_c1_g8_i2	1429	1152.28	0	0	0	0
Alpha-latroinsectotoxin-Lt1a_2	AB_RSEM.txt	TRINITY_DN43327_c1_g8_i5	1319	1042.28	0	0	0	0
Alpha-latroinsectotoxin-Lt1a_2	AB_RSEM.txt	TRINITY_DN37803_c0_g2_i2	2258	1981.28	0	0	0	0
Alpha-latroinsectotoxin-Lt1a_2	AB_RSEM.txt	TRINITY_DN37803_c0_g2_i5	2187	1910.28	0	0	0	0
Alpha-latroinsectotoxin-Lt1a_2	AB_RSEM.txt	TRINITY_DN37862_c0_g1_i3	4129	3852.28	0	0	0	0
Alpha-latroinsectotoxin-Lt1a_2	AB_RSEM.txt	TRINITY_DN37862_c0_g1_i6	3733	3456.28	0	0	0	0
Alpha-latroinsectotoxin-Lt1a_2	AB_RSEM.txt	TRINITY_DN44347_c0_g2_i4	2251	1974.28	0	0	0	0
Alpha-latroinsectotoxin-Lt1a_2	AB_RSEM.txt	TRINITY_DN44347_c0_g2_i13	1280	1003.28	0	0	0	0
Alpha-latroinsectotoxin-Lt1a_2	AB_RSEM.txt	TRINITY_DN44347_c0_g5_i1	401	124.65	0	0	0	0
Alpha-latroinsectotoxin-Lt1a_2	AB_RSEM.txt	TRINITY_DN44347_c0_g6_i1	710	433.28	0	0	0	0
Alpha-latroinsectotoxin-Lt1a_2	AB_RSEM.txt	TRINITY_DN41883_c4_g1_i11	1064	787.28	0	0	0	0
Alpha-latroinsectotoxin-Lt1a_2	AB_RSEM.txt	TRINITY_DN41883_c4_g1_i13	4105	3828.28	0	0	0	0
Alpha-latroinsectotoxin-Lt1a_2	AB_RSEM.txt	TRINITY_DN41883_c4_g1_i4	4203	3926.28	0	0	0	0
Alpha-latroinsectotoxin-Lt1a_2	AB_RSEM.txt	TRINITY_DN39831_c0_g1_i2	3931	3654.28	0	0	0	0
Alpha-latroinsectotoxin-Lt1a_2	AB_RSEM.txt	TRINITY_DN39831_c0_g1_i3	4231	3954.28	0	0	0	0
Alpha-latroinsectotoxin-Lt1a_2	AB_RSEM.txt	TRINITY_DN44798_c3_g3_i3	4087	3810.28	1.68	0	0.01	0.01
Alpha-latroinsectotoxin-Lt1a_2	AB_RSEM.txt	TRINITY_DN44798_c3_g3_i8	710	433.28	0	0	0	0
Alpha-latroinsectotoxin-Lt1a_2	AB_RSEM.txt	TRINITY_DN44741_c0_g1_i3	1639	1362.28	0	0	0	0
Alpha-latroinsectotoxin-Lt1a_2	AB_RSEM.txt	TRINITY_DN44741_c0_g1_i8	2131	1854.28	0	0	0	0
Alpha-latroinsectotoxin-Lt1a_2	AB_RSEM.txt	TRINITY_DN44767_c0_g1_i7	14616	14339.3	0	0	0	0
Alpha-latroinsectotoxin-Lt1a_2	AB_RSEM.txt	TRINITY_DN44767_c0_g1_i9	14548	14271.3	0	0	0	0
Alpha-latroinsectotoxin-Lt1a_2	AB_RSEM.txt	TRINITY_DN42748_c0_g1_i2	3318	3041.28	0	0	0	0
Alpha-latroinsectotoxin-Lt1a_2	AB_RSEM.txt	TRINITY_DN42748_c0_g1_i3	3198	2921.28	0	0	0	0
Alpha-latroinsectotoxin-Lt1a_2	AB_RSEM.txt	TRINITY_DN42748_c0_g1_i5	3234	2957.28	0	0	0	0
Alpha-latroinsectotoxin-Lt1a_2	AB_RSEM.txt	TRINITY_DN42748_c0_g1_i9	3242	2965.28	0	0	0	0
Alpha-latroinsectotoxin-Lt1a_2	AB_RSEM.txt	TRINITY_DN42748_c0_g1_i10	3275	2998.28	0	0	0	0
Alpha-latroinsectotoxin-Lt1a_2	AB_RSEM.txt	TRINITY_DN42748_c0_g1_i11	3157	2880.28	0	0	0	0
Alpha-latroinsectotoxin-Lt1a_2	AB_RSEM.txt	TRINITY_DN42748_c0_g1_i12	3114	2837.28	0	0	0	0
Alpha-latroinsectotoxin-Lt1a_2	AB_RSEM.txt	TRINITY_DN42748_c0_g1_i13	3073	2796.28	0	0	0	0
Alpha-latroinsectotoxin-Lt1a_2	AB_RSEM.txt	TRINITY_DN4496_c0_g2_i1	366	91.28	0	0	0	0
Alpha-latroinsectotoxin-Lt1a_2	AB_RSEM.txt	TRINITY_DN44887_c1_g1_i3	2469	2192.28	0	0	0	0
Alpha-latroinsectotoxin-Lt1a_2	AB_RSEM.txt	TRINITY_DN44887_c1_g1_i4	2550	2273.28	0	0	0	0
Alpha-latroinsectotoxin-Lt1a_2	AB_RSEM.txt	TRINITY_DN44887_c1_g1_i9	1897	1620.28	0	0	0	0
Alpha-latroinsectotoxin-Lt1a_2	AB_RSEM.txt	TRINITY_DN44887_c1_g1_i10	1727	1450.28	0	0	0	0
Alpha-latroinsectotoxin-Lt1a_2	AB_RSEM.txt	TRINITY_DN44887_c1_g1_i12	2461	2184.28	0	0	0	0
Alpha-latroinsectotoxin-Lt1a_2	AB_RSEM.txt	TRINITY_DN44887_c1_g1_i16	1816	1539.28	0	0	0	0
Alpha-latroinsectotoxin-Lt1a_2	AB_RSEM.txt	TRINITY_DN42544_c1_g4_i2	1874	1597.28	0	0	0	0
Alpha-latroinsectotoxin-Lt1a_2	AB_RSEM.txt	TRINITY_DN42544_c1_g4_i5	2169	1892.28	0	0	0	0
Alpha-latroinsectotoxin-Lt1a_2	AB_RSEM.txt	TRINITY_DN42847_c2_g1_i10	2668	2391.28	0	0	0	0
Alpha-latroinsectotoxin-Lt1a_2	AB_RSEM.txt	TRINITY_DN42847_c2_g1_i12	2904	2627.28	0.11	0	0	0
Alpha-latroinsectotoxin-Lt1a_2	AB_RSEM.txt	TRINITY_DN42847_c2_g1_i14	2982	2705.28	0	0	0	0
Alpha-latroinsectotoxin-Lt1a_2	AB_RSEM.txt	TRINITY_DN42847_c2_g1_i15	2876	2599.28	0	0	0	0
Alpha-latroinsectotoxin-Lt1a_2	AB_RSEM.txt	TRINITY_DN42847_c2_g1_i18	2785	2508.28	0	0	0	0
Alpha-latroinsectotoxin-Lt1a_2	AB_RSEM.txt	TRINITY_DN42847_c2_g1_i20	2980	2703.28	1.32	0	0.01	0.03
Alpha-latroinsectotoxin-Lt1a_2	AB_RSEM.txt	TRINITY_DN42847_c2_g1_i25	2759	2482.28	0	0	0	0
Alpha-latroinsectotoxin-Lt1a_2	AB_RSEM.txt	TRINITY_DN42847_c2_g1_i26	3073	2796.28	0	0	0	0
Alpha-latroinsectotoxin-Lt1a_2	AB_RSEM.txt	TRINITY_DN42847_c2_g1_i27	669	392.29	0	0	0	0
Alpha-latroinsectotoxin-Lt1a_2	AB_RSEM.txt	TRINITY_DN42847_c2_g1_i28	587	310.31	0	0	0	0
Alpha-latroinsectotoxin-Lt1a_2	AB_RSEM.txt	TRINITY_DN42847_c2_g1_i3	2696	2419.28	0.89	0	0	0.02
Alpha-latroinsectotoxin-Lt1a_2	AB_RSEM.txt	TRINITY_DN42847_c2_g1_i4	2787	2510.28	1.22	0	0.01	0.03
Alpha-latroinsectotoxin-Lt1a_2	AB_RSEM.txt	TRINITY_DN19924_c0_g2_i1	1170	893.28	0	0	0	0
Alpha-latroinsectotoxin-Lt1a_2	AB_RSEM.txt	TRINITY_DN37932_c0_g4_i1	2242	1965.28	0	0	0	0
Alpha-latroinsectotoxin-Lt1a_2	AB_RSEM.txt	TRINITY_DN37932_c0_g4_i3	2225	1948.28	0	0	0	0
Alpha-latroinsectotoxin-Lt1a_2	AB_RSEM.txt	TRINITY_DN37932_c0_g4_i6	2156	1879.28	0	0	0	0
Astacin-like_metalloprotease_toxin_1_1	AB_RSEM.txt	TRINITY_DN21625_c0_g1_i1	396	119.76	29	1.67	2.97	100
Astacin-like_metalloprotease_toxin_1_1	AB_RSEM.txt	TRINITY_DN84264_c0_g1_i1	429	152.4	24	1.08	1.93	100
Astacin-like_metalloprotease_toxin_1_1	AB_RSEM.txt	TRINITY_DN35983_c0_g5_i1	1573	1296.28	165.26	0.88	1.56	100
Astacin-like_metalloprotease_toxin_1_1	AB_RSEM.txt	TRINITY_DN35983_c0_g3_i1	664	387.29	6.74	0.12	0.21	100
Conophysin-R_1	AB_RSEM.txt	TRINITY_DN42561_c1_g1_i7	1930	1653.28	155.38	0.65	1.15	21.01
Conophysin-R_1	AB_RSEM.txt	TRINITY_DN42561_c1_g1_i6	2570	2293.28	57.4	0.17	0.31	5.59
Conophysin-R_1	AB_RSEM.txt	TRINITY_DN42561_c1_g1_i5	2544	2267.28	9.9	0.03	0.05	0.98
Conophysin-R_1	AB_RSEM.txt	TRINITY_DN42561_c1_g1_i9	1916	1639.28	0	0	0	0
Cysteine-rich_venom_protein_bucarin_1	AB_RSEM.txt	TRINITY_DN42308_c1_g1_i1	4567	4290.28	1426.5	2.29	4.08	27.29
Cysteine-rich_venom_protein_bucarin_1	AB_RSEM.txt	TRINITY_DN42308_c1_g1_i4	4246	3969.28	1263.82	2.19	3.91	26.14
Cysteine-rich_venom_protein_bucarin_1	AB_RSEM.txt	TRINITY_DN42308_c1_g1_i5	4223	3946.28	235.74	0.41	0.73	4.9
Cysteine-rich_venom_protein_Mr30_2	AB_RSEM.txt	TRINITY_DN43966_c3_g4_i2	1765	1488.28	3547	16.41	29.24	35.16
Cysteine-rich_venom_protein_Mr30_2	AB_RSEM.txt	TRINITY_DN43966_c3_g4_i5	1121	844.28	1702.41	13.89	24.74	29.75
Cysteine-rich_venom_protein_Mr30_2	AB_RSEM.txt	TRINITY_DN43966_c3_g4_i1	1451	1174.28	228.9	1.34	2.39	2.88
Cysteine-rich_venom_protein_Mr30_2	AB_RSEM.txt	TRINITY_DN44812_c2_g5_i7	1035	758.28	12.23	0.11	0.2	78.53
Cysteine-rich_venom_protein_Mr30_2	AB_RSEM.txt	TRINITY_DN44812_c2_g5_i4	409	132.53	0.36	0.02	0.03	13.36
Cysteine-rich_venom_protein_Mr30_2	AB_RSEM.txt	TRINITY_DN43966_c3_g4_i8	1385	1108.28	0	0	0	0
Delta-latroinsectotoxin-Lt1a_1	AB_RSEM.txt	TRINITY_DN35012_c0_g1_i1	4997	4720.28	5968	8.71	15.51	100
Delta-latroinsectotoxin-Lt1a_1	AB_RSEM.txt	TRINITY_DN42503_c0_g1_i1	2307	2030.28	883.04	3	5.34	22.58
Delta-latroinsectotoxin-Lt1a_1	AB_RSEM.txt	TRINITY_DN44050_c0_g1_i1	1288	1011.28	273	1.86	3.31	100
Delta-latroinsectotoxin-Lt1a_1	AB_RSEM.txt	TRINITY_DN43951_c1_g3_i2	2222	1945.28	391.64	1.39	2.47	19.45
Delta-latroinsectotoxin-Lt1a_1	AB_RSEM.txt	TRINITY_DN42503_c0_g1_i11	2425	2148.28	250.74	0.8	1.43	6.06
Delta-latroinsectotoxin-Lt1a_1	AB_RSEM.txt	TRINITY_DN42748_c0_g1_i7	3190	2913.28	51.84	0.12	0.22	4.89
Delta-latroinsectotoxin-Lt1a_1	AB_RSEM.txt	TRINITY_DN43951_c1_g3_i4	1199	922.28	5.77	0.04	0.08	0.6
Delta-latroinsectotoxin-Lt1a_1	AB_RSEM.txt	TRINITY_DN42748_c0_g1_i8	3351	3074.28	13.67	0.03	0.05	1.22
Delta-latroinsectotoxin-Lt1a_1	AB_RSEM.txt	TRINITY_DN43822_c0_g4_i1	388	112.01	0	0	0	0
Disintegrin_acostatin-alpha_26	AB_RSEM.txt	TRINITY_DN43191_c3_g2_i3	8062	7785.28	8004.82	7.08	12.62	16.43
Disintegrin_acostatin-alpha_26	AB_RSEM.txt	TRINITY_DN43191_c3_g2_i5	8054	7777.28	6725.99	5.96	10.61	13.82
Disintegrin_bitistatin_6	AB_RSEM.txt	TRINITY_DN43602_c0_g6_i9	485	208.35	17.7	0.59	1.04	54.44
Disintegrin_bitistatin_6	AB_RSEM.txt	TRINITY_DN43602_c0_g3_i3	1512	1235.28	98.13	0.55	0.97	7.81
Disintegrin_bitistatin_6	AB_RSEM.txt	TRINITY_DN43602_c0_g3_i4	1094	817.28	52.14	0.44	0.78	6.27
Disintegrin_bitistatin_6	AB_RSEM.txt	TRINITY_DN43602_c0_g6_i2	689	412.29	2.73	0.05	0.08	4.24
Disintegrin_bitistatin_6	AB_RSEM.txt	TRINITY_DN43602_c0_g6_i3	873	596.28	0	0	0	0
Disintegrin_bitistatin_6	AB_RSEM.txt	TRINITY_DN43602_c0_g6_i4	953	676.28	0	0	0	0
Disintegrin_bitistatin_6	AB_RSEM.txt	TRINITY_DN43602_c0_g6_i8	769	492.28	0	0	0	0
Factor_V_activator_RVV-V_gamma_142	AB_RSEM.txt	TRINITY_DN43918_c5_g1_i8	1945	1668.28	2570.49	10.61	18.91	45.04
Factor_V_activator_RVV-V_gamma_142	AB_RSEM.txt	TRINITY_DN43918_c5_g1_i10	1945	1668.28	2570.49	10.61	18.91	45.04
Factor_V_activator_RVV-V_gamma_142	AB_RSEM.txt	TRINITY_DN38594_c0_g1_i3	2154	1877.28	2483.33	9.11	16.23	78.88
Factor_V_activator_RVV-V_gamma_142	AB_RSEM.txt	TRINITY_DN30551_c0_g1_i4	1168	891.28	822.87	6.36	11.33	55.33
Factor_V_activator_RVV-V_gamma_142	AB_RSEM.txt	TRINITY_DN36424_c0_g1_i1	974	697.28	432	4.27	7.6	100
Factor_V_activator_RVV-V_gamma_142	AB_RSEM.txt	TRINITY_DN30551_c0_g1_i3	1545	1268.28	700.28	3.8	6.78	33.09
Factor_V_activator_RVV-V_gamma_142	AB_RSEM.txt	TRINITY_DN43689_c4_g20_i1	974	697.28	366	3.61	6.44	100
Factor_V_activator_RVV-V_gamma_142	AB_RSEM.txt	TRINITY_DN37278_c0_g1_i1	854	577.28	273	3.26	5.8	100
Factor_V_activator_RVV-V_gamma_142	AB_RSEM.txt	TRINITY_DN38538_c0_g1_i1	1115	838.28	394.73	3.24	5.78	96.46
Factor_V_activator_RVV-V_gamma_142	AB_RSEM.txt	TRINITY_DN43295_c1_g11_i9	1752	1475.28	588.53	2.75	4.9	15.68
Factor_V_activator_RVV-V_gamma_142	AB_RSEM.txt	TRINITY_DN40401_c0_g1_i4	3581	3304.28	1232.98	2.57	4.58	30.4
Factor_V_activator_RVV-V_gamma_142	AB_RSEM.txt	TRINITY_DN44847_c4_g1_i3	6088	5811.28	1652.74	1.96	3.49	24.75
Factor_V_activator_RVV-V_gamma_142	AB_RSEM.txt	TRINITY_DN36022_c0_g2_i1	1127	850.28	233	1.89	3.36	100
Factor_V_activator_RVV-V_gamma_142	AB_RSEM.txt	TRINITY_DN43295_c1_g11_i10	1330	1053.28	238.27	1.56	2.78	8.89
Factor_V_activator_RVV-V_gamma_142	AB_RSEM.txt	TRINITY_DN40401_c0_g1_i10	3494	3217.28	657.29	1.41	2.51	16.65
Factor_V_activator_RVV-V_gamma_142	AB_RSEM.txt	TRINITY_DN30563_c0_g1_i4	1980	1703.28	290.32	1.17	2.09	35.95
Factor_V_activator_RVV-V_gamma_142	AB_RSEM.txt	TRINITY_DN44847_c4_g1_i5	6088	5811.28	874.64	1.04	1.85	13.1
Factor_V_activator_RVV-V_gamma_142	AB_RSEM.txt	TRINITY_DN29651_c0_g1_i1	503	226.34	29.65	0.9	1.61	37.68
Factor_V_activator_RVV-V_gamma_142	AB_RSEM.txt	TRINITY_DN70493_c0_g1_i1	908	631.28	82.45	0.9	1.6	100
Factor_V_activator_RVV-V_gamma_142	AB_RSEM.txt	TRINITY_DN29651_c0_g1_i2	1264	987.28	119.1	0.83	1.48	34.69
Factor_V_activator_RVV-V_gamma_142	AB_RSEM.txt	TRINITY_DN41899_c0_g1_i1	499	222.34	25.49	0.79	1.41	25.86
Factor_V_activator_RVV-V_gamma_142	AB_RSEM.txt	TRINITY_DN44839_c3_g4_i2	2656	2379.28	258	0.75	1.33	100
Factor_V_activator_RVV-V_gamma_142	AB_RSEM.txt	TRINITY_DN44847_c4_g1_i2	6152	5875.28	629.27	0.74	1.31	9.32
Factor_V_activator_RVV-V_gamma_142	AB_RSEM.txt	TRINITY_DN39691_c0_g1_i1	1191	914.28	95	0.72	1.27	12.59
Factor_V_activator_RVV-V_gamma_142	AB_RSEM.txt	TRINITY_DN29651_c0_g1_i3	1518	1241.28	119.25	0.66	1.18	27.63
Factor_V_activator_RVV-V_gamma_142	AB_RSEM.txt	TRINITY_DN43295_c1_g11_i5	1744	1467.28	103.24	0.48	0.86	2.77
Factor_V_activator_RVV-V_gamma_142	AB_RSEM.txt	TRINITY_DN46785_c0_g1_i1	910	633.28	43	0.47	0.83	100
Factor_V_activator_RVV-V_gamma_142	AB_RSEM.txt	TRINITY_DN39691_c0_g1_i3	1034	757.28	52.15	0.47	0.84	8.34
Factor_V_activator_RVV-V_gamma_142	AB_RSEM.txt	TRINITY_DN39691_c0_g1_i5	1034	757.28	52.15	0.47	0.84	8.34
Factor_V_activator_RVV-V_gamma_142	AB_RSEM.txt	TRINITY_DN43238_c0_g1_i1	683	406.29	27	0.46	0.82	100
Factor_V_activator_RVV-V_gamma_142	AB_RSEM.txt	TRINITY_DN29062_c0_g1_i1	1224	947.28	54.89	0.4	0.71	100
Factor_V_activator_RVV-V_gamma_142	AB_RSEM.txt	TRINITY_DN30551_c0_g1_i5	1527	1250.28	67.9	0.37	0.67	3.25
Factor_V_activator_RVV-V_gamma_142	AB_RSEM.txt	TRINITY_DN94275_c0_g1_i1	542	265.32	5	0.13	0.23	100
Factor_V_activator_RVV-V_gamma_142	AB_RSEM.txt	TRINITY_DN19058_c0_g2_i1	774	497.28	9	0.12	0.22	100
Factor_V_activator_RVV-V_gamma_142	AB_RSEM.txt	TRINITY_DN44773_c6_g5_i5	796	519.28	5.16	0.07	0.12	1.43
Factor_V_activator_RVV-V_gamma_142	AB_RSEM.txt	TRINITY_DN19058_c0_g1_i1	768	491.28	0	0	0	0
Factor_V_activator_RVV-V_gamma_142	AB_RSEM.txt	TRINITY_DN43918_c5_g2_i1	624	347.3	0	0	0	0
Factor_V_activator_RVV-V_gamma_142	AB_RSEM.txt	TRINITY_DN43918_c5_g1_i9	1927	1650.28	0	0	0	0
Factor_V_activator_RVV-V_gamma_142	AB_RSEM.txt	TRINITY_DN43918_c5_g1_i11	1927	1650.28	0	0	0	0
Factor_V_activator_RVV-V_gamma_142	AB_RSEM.txt	TRINITY_DN43918_c5_g1_i12	1527	1250.28	0	0	0	0
Factor_V_activator_RVV-V_gamma_142	AB_RSEM.txt	TRINITY_DN43295_c1_g11_i6	1773	1496.28	0	0	0	0
Factor_V_activator_RVV-V_gamma_142	AB_RSEM.txt	TRINITY_DN43295_c1_g11_i7	1765	1488.28	0	0	0	0
Factor_V_activator_RVV-V_gamma_142	AB_RSEM.txt	TRINITY_DN43295_c1_g11_i8	1309	1032.28	0	0	0	0
Factor_V_activator_RVV-V_gamma_142	AB_RSEM.txt	TRINITY_DN37278_c0_g1_i2	855	578.28	0	0	0	0
Factor_V_activator_RVV-V_gamma_142	AB_RSEM.txt	TRINITY_DN26795_c0_g1_i2	867	590.28	0	0	0	0
Galactose-specific_lectin_nattectin_1	AB_RSEM.txt	TRINITY_DN39536_c0_g2_i4	2041	1764.28	575.25	2.25	4	0.97
Hyaluronidase_1	AB_RSEM.txt	TRINITY_DN43442_c0_g2_i3	2427	2150.28	443.27	1.42	2.53	57.45
Hyaluronidase_1	AB_RSEM.txt	TRINITY_DN43442_c0_g2_i7	940	663.28	90.58	0.94	1.68	38.06
Hyaluronidase_1	AB_RSEM.txt	TRINITY_DN43442_c0_g3_i1	929	652.28	21	0.22	0.4	100
Hyaluronidase_1	AB_RSEM.txt	TRINITY_DN43442_c0_g2_i1	2579	2302.28	11.61	0.03	0.06	1.4
Hyaluronidase_1	AB_RSEM.txt	TRINITY_DN43442_c0_g2_i5	1028	751.28	0	0	0	0
Hyaluronidase_1	AB_RSEM.txt	TRINITY_DN43442_c0_g2_i6	2515	2238.28	0	0	0	0
Hyaluronidase_1	AB_RSEM.txt	TRINITY_DN43442_c0_g3_i3	522	245.33	0	0	0	0
Hyaluronidase_1	AB_RSEM.txt	TRINITY_DN43442_c0_g3_i4	954	677.28	0	0	0	0
KappaPI-theraphotoxin-Hs1a_80	AB_RSEM.txt	TRINITY_DN42804_c1_g8_i1	863	586.28	87	1.02	1.82	100
KappaPI-theraphotoxin-Hs1a_80	AB_RSEM.txt	TRINITY_DN43186_c0_g1_i2	2124	1847.28	242.92	0.91	1.61	64.74
KappaPI-theraphotoxin-Hs1a_80	AB_RSEM.txt	TRINITY_DN42335_c0_g4_i1	1021	744.28	54	0.5	0.89	100
KappaPI-theraphotoxin-Hs1a_80	AB_RSEM.txt	TRINITY_DN43186_c0_g1_i3	2205	1928.28	138.08	0.49	0.88	35.26
KappaPI-theraphotoxin-Hs1a_80	AB_RSEM.txt	TRINITY_DN43186_c0_g1_i1	2204	1927.28	0	0	0	0
KappaPI-theraphotoxin-Hs1a_80	AB_RSEM.txt	TRINITY_DN43186_c0_g1_i4	2123	1846.28	0	0	0	0
KappaPI-theraphotoxin-Hs1a_80	AB_RSEM.txt	TRINITY_DN42335_c0_g5_i1	563	286.31	0	0	0	0
KappaPI-theraphotoxin-Hs1a_80	AB_RSEM.txt	TRINITY_DN42335_c0_g5_i2	525	248.33	0	0	0	0
Kunitz-type_serine_protease_inhibitor_2_4	AB_RSEM.txt	TRINITY_DN42335_c0_g6_i1	2110	1833.28	152	0.57	1.02	100
Kunitz-type_serine_protease_inhibitor_As-fr-19_1	AB_RSEM.txt	TRINITY_DN42804_c1_g8_i2	393	116.84	0	0	0	0
Kunitz-type_serine_protease_inhibitor_bitisilin-3_1	AB_RSEM.txt	TRINITY_DN43785_c1_g4_i2	1139	862.28	297.86	2.38	4.24	9.33
Kunitz-type_serine_protease_inhibitor_bitisilin-3_1	AB_RSEM.txt	TRINITY_DN43785_c1_g4_i9	1016	739.28	62.75	0.58	1.04	2.29
Kunitz-type_serine_protease_inhibitor_bitisilin-3_1	AB_RSEM.txt	TRINITY_DN43785_c1_g4_i7	1787	1510.28	0	0	0	0
Kunitz-type_serine_protease_inhibitor_BmKTT-2_1	AB_RSEM.txt	TRINITY_DN43785_c1_g4_i5	3271	2994.28	5940.45	13.66	24.34	53.61
Kunitz-type_serine_protease_inhibitor_BmKTT-2_1	AB_RSEM.txt	TRINITY_DN43785_c1_g4_i4	5233	4956.28	2297.69	3.19	5.69	12.53
Kunitz-type_serine_protease_inhibitor_BmKTT-2_1	AB_RSEM.txt	TRINITY_DN43785_c1_g4_i1	1664	1387.28	560.12	2.78	4.95	10.91
Kunitz-type_serine_protease_inhibitor_BmKTT-2_1	AB_RSEM.txt	TRINITY_DN43785_c1_g4_i6	5832	5555.28	1869.01	2.32	4.13	9.09
Kunitz-type_serine_protease_inhibitor_BmKTT-2_1	AB_RSEM.txt	TRINITY_DN43785_c1_g4_i3	6066	5789.28	419.77	0.5	0.89	1.96
Kunitz-type_serine_protease_inhibitor_BmKTT-2_1	AB_RSEM.txt	TRINITY_DN43785_c1_g4_i8	2009	1732.28	17.34	0.07	0.12	0.27
Neprilysin-1_1	AB_RSEM.txt	TRINITY_DN43042_c0_g1_i17	3097	2820.28	32903.3	80.35	143.16	34.15
Neprilysin-1_1	AB_RSEM.txt	TRINITY_DN43961_c0_g1_i6	2165	1888.28	10651	38.85	69.21	81.79
Neprilysin-1_1	AB_RSEM.txt	TRINITY_DN43042_c0_g1_i19	2795	2518.28	13093.3	35.81	63.8	15.22
Neprilysin-1_1	AB_RSEM.txt	TRINITY_DN41991_c2_g1_i1	3947	3670.28	8571	16.08	28.65	100
Neprilysin-1_1	AB_RSEM.txt	TRINITY_DN43042_c0_g1_i11	3355	3078.28	5341.19	11.95	21.29	5.08
Neprilysin-1_1	AB_RSEM.txt	TRINITY_DN43042_c0_g1_i15	3251	2974.28	4321.38	10.01	17.83	4.25
Neprilysin-1_1	AB_RSEM.txt	TRINITY_DN29305_c0_g1_i3	668	391.29	414.06	7.29	12.98	96.06
Neprilysin-1_1	AB_RSEM.txt	TRINITY_DN40706_c1_g1_i19	1868	1591.28	1605.58	6.95	12.38	25.07
Neprilysin-1_1	AB_RSEM.txt	TRINITY_DN43961_c0_g1_i3	1529	1252.28	1201.96	6.61	11.78	13.92
Neprilysin-1_1	AB_RSEM.txt	TRINITY_DN40418_c0_g1_i1	5262	4985.28	4347.17	6.01	10.7	100
Neprilysin-1_1	AB_RSEM.txt	TRINITY_DN41166_c0_g1_i4	4582	4305.28	3658.61	5.85	10.43	60.88
Neprilysin-1_1	AB_RSEM.txt	TRINITY_DN40706_c1_g1_i3	1914	1637.28	986.14	4.15	7.39	14.96
Neprilysin-1_1	AB_RSEM.txt	TRINITY_DN37329_c1_g1_i1	2207	1930.28	1002.29	3.58	6.37	92.48
Neprilysin-1_1	AB_RSEM.txt	TRINITY_DN40706_c1_g1_i2	1811	1534.28	752.82	3.38	6.02	12.19
Neprilysin-1_1	AB_RSEM.txt	TRINITY_DN40706_c1_g1_i18	1831	1554.28	626.89	2.78	4.95	10.02
Neprilysin-1_1	AB_RSEM.txt	TRINITY_DN41984_c4_g7_i3	3299	3022.28	1097.9	2.5	4.46	32.51
Neprilysin-1_1	AB_RSEM.txt	TRINITY_DN43042_c0_g1_i22	453	176.37	61.09	2.39	4.25	1.01
Neprilysin-1_1	AB_RSEM.txt	TRINITY_DN43042_c0_g1_i16	3201	2924.28	980.09	2.31	4.11	0.98
Neprilysin-1_1	AB_RSEM.txt	TRINITY_DN41984_c4_g7_i10	2778	2501.28	710.11	1.96	3.48	25.41
Neprilysin-1_1	AB_RSEM.txt	TRINITY_DN40706_c1_g1_i15	1852	1575.28	428.08	1.87	3.33	6.75
Neprilysin-1_1	AB_RSEM.txt	TRINITY_DN41166_c0_g1_i5	2131	1854.28	492.58	1.83	3.26	19.03
Neprilysin-1_1	AB_RSEM.txt	TRINITY_DN27804_c0_g1_i1	790	513.28	130	1.74	3.11	100
Neprilysin-1_1	AB_RSEM.txt	TRINITY_DN40706_c1_g1_i24	1938	1661.28	351.12	1.46	2.59	5.25
Neprilysin-1_1	AB_RSEM.txt	TRINITY_DN41984_c4_g7_i4	1916	1639.28	339.29	1.43	2.54	18.53
Neprilysin-1_1	AB_RSEM.txt	TRINITY_DN40706_c1_g1_i6	316	49.9	8.78	1.21	2.16	4.37
Neprilysin-1_1	AB_RSEM.txt	TRINITY_DN40706_c1_g1_i1	659	382.29	57	1.03	1.83	3.7
Neprilysin-1_1	AB_RSEM.txt	TRINITY_DN40706_c1_g1_i21	2577	2300.28	295.61	0.89	1.58	3.19
Neprilysin-1_1	AB_RSEM.txt	TRINITY_DN40706_c1_g1_i23	2334	2057.28	264.24	0.88	1.58	3.19
Neprilysin-1_1	AB_RSEM.txt	TRINITY_DN40706_c1_g1_i17	2618	2341.28	269.88	0.79	1.41	2.86
Neprilysin-1_1	AB_RSEM.txt	TRINITY_DN41984_c4_g7_i2	3286	3009.28	301.49	0.69	1.23	8.97
Neprilysin-1_1	AB_RSEM.txt	TRINITY_DN40706_c1_g1_i20	438	161.38	15.21	0.65	1.16	2.34
Neprilysin-1_1	AB_RSEM.txt	TRINITY_DN40706_c1_g1_i9	1571	1294.28	121.16	0.64	1.15	2.33
Neprilysin-1_1	AB_RSEM.txt	TRINITY_DN43042_c0_g1_i1	3167	2890.28	261.56	0.62	1.11	0.26
Neprilysin-1_1	AB_RSEM.txt	TRINITY_DN40706_c1_g1_i4	1979	1702.28	89.58	0.36	0.65	1.31
Neprilysin-1_1	AB_RSEM.txt	TRINITY_DN41984_c4_g7_i9	1686	1409.28	71.56	0.35	0.62	4.54
Neprilysin-1_1	AB_RSEM.txt	TRINITY_DN41984_c4_g7_i6	3505	3228.28	152.87	0.33	0.58	4.24
Neprilysin-1_1	AB_RSEM.txt	TRINITY_DN23821_c0_g3_i1	541	264.32	11.53	0.3	0.54	100
Neprilysin-1_1	AB_RSEM.txt	TRINITY_DN41166_c0_g1_i3	4712	4435.28	173.42	0.27	0.48	2.8
Neprilysin-1_1	AB_RSEM.txt	TRINITY_DN29305_c0_g1_i1	668	391.29	15.2	0.27	0.48	3.53
Neprilysin-1_1	AB_RSEM.txt	TRINITY_DN41984_c4_g7_i5	2765	2488.28	84.93	0.24	0.42	3.05
Neprilysin-1_1	AB_RSEM.txt	TRINITY_DN27449_c0_g1_i1	964	687.28	20	0.2	0.36	100
Neprilysin-1_1	AB_RSEM.txt	TRINITY_DN43042_c0_g1_i20	3428	3151.28	54.6	0.12	0.21	0.05
Neprilysin-1_1	AB_RSEM.txt	TRINITY_DN41984_c4_g7_i8	1089	812.28	14.47	0.12	0.22	1.59
Neprilysin-1_1	AB_RSEM.txt	TRINITY_DN43042_c0_g1_i21	3324	3047.28	44.42	0.1	0.18	0.04
Neprilysin-1_1	AB_RSEM.txt	TRINITY_DN40706_c1_g1_i16	2133	1856.28	25.12	0.09	0.17	0.34
Neprilysin-1_1	AB_RSEM.txt	TRINITY_DN40706_c1_g1_i8	2651	2374.28	32.55	0.09	0.17	0.34
Neprilysin-1_1	AB_RSEM.txt	TRINITY_DN41984_c4_g7_i1	3492	3215.28	41.36	0.09	0.16	1.15
Neprilysin-1_1	AB_RSEM.txt	TRINITY_DN40706_c1_g1_i10	2174	1897.28	19.45	0.07	0.13	0.25
Neprilysin-1_1	AB_RSEM.txt	TRINITY_DN43042_c0_g1_i13	3352	3075.28	26.84	0.06	0.11	0.03
Neprilysin-1_1	AB_RSEM.txt	TRINITY_DN40706_c1_g1_i13	2778	2501.28	14.37	0.04	0.07	0.14
Neprilysin-1_1	AB_RSEM.txt	TRINITY_DN29305_c0_g1_i2	661	384.29	1.74	0.03	0.06	0.41
Neprilysin-1_1	AB_RSEM.txt	TRINITY_DN43042_c0_g1_i5	3271	2994.28	9.78	0.02	0.04	0.01
Neprilysin-1_1	AB_RSEM.txt	TRINITY_DN40706_c1_g1_i11	2687	2410.28	0	0	0	0
Neprilysin-1_1	AB_RSEM.txt	TRINITY_DN40706_c1_g1_i12	1584	1307.28	0	0	0	0
Neprilysin-1_1	AB_RSEM.txt	TRINITY_DN40706_c1_g1_i14	2700	2423.28	0	0	0	0
Neprilysin-1_1	AB_RSEM.txt	TRINITY_DN40706_c1_g1_i22	2207	1930.28	0.86	0	0.01	0.01
Neprilysin-1_1	AB_RSEM.txt	TRINITY_DN40706_c1_g1_i7	2243	1966.28	0	0	0	0
Neprilysin-1_1	AB_RSEM.txt	TRINITY_DN43042_c0_g1_i10	3436	3159.28	0	0	0	0
Neprilysin-1_1	AB_RSEM.txt	TRINITY_DN43042_c0_g1_i12	892	615.28	0	0	0	0
Neprilysin-1_1	AB_RSEM.txt	TRINITY_DN43042_c0_g1_i14	3456	3179.28	1.11	0	0	0
Neprilysin-1_1	AB_RSEM.txt	TRINITY_DN43042_c0_g1_i18	2005	1728.28	0	0	0	0
Neprilysin-1_1	AB_RSEM.txt	TRINITY_DN43042_c0_g1_i2	3484	3207.28	0	0	0	0
Neprilysin-1_1	AB_RSEM.txt	TRINITY_DN43042_c0_g1_i3	3380	3103.28	0	0	0	0
Neprilysin-1_1	AB_RSEM.txt	TRINITY_DN43042_c0_g1_i7	3540	3263.28	0	0	0	0
Neprilysin-1_1	AB_RSEM.txt	TRINITY_DN41166_c0_g1_i2	1841	1564.28	0	0	0	0
Peroxiredoxin-4_1	AB_RSEM.txt	TRINITY_DN44447_c0_g3_i4	900	623.28	500.07	5.53	9.84	72.26
Peroxiredoxin-4_1	AB_RSEM.txt	TRINITY_DN37544_c0_g1_i1	1416	1139.28	652	3.94	7.02	100
Peroxiredoxin-4_1	AB_RSEM.txt	TRINITY_DN44447_c0_g3_i7	1855	1578.28	164.64	0.72	1.28	9.39
Peroxiredoxin-4_1	AB_RSEM.txt	TRINITY_DN44447_c0_g3_i6	836	559.28	49.11	0.6	1.08	7.91
Peroxiredoxin-4_1	AB_RSEM.txt	TRINITY_DN44447_c0_g3_i3	1846	1569.28	59.6	0.26	0.47	3.42
Phospholipase_A1_19	AB_RSEM.txt	TRINITY_DN42913_c2_g1_i1	835	558.28	1015.77	12.53	22.33	49.15
Phospholipase_A1_19	AB_RSEM.txt	TRINITY_DN42913_c2_g1_i2	1300	1023.28	1105.97	7.44	13.26	29.2
Phospholipase_A1_19	AB_RSEM.txt	TRINITY_DN36408_c0_g1_i1	1343	1066.28	1096.77	7.08	12.62	58.32
Phospholipase_A1_19	AB_RSEM.txt	TRINITY_DN42675_c1_g3_i11	1078	801.28	546.84	4.7	8.37	24.19
Phospholipase_A1_19	AB_RSEM.txt	TRINITY_DN42913_c1_g1_i1	398	121.72	77.51	4.39	7.81	56.23
Phospholipase_A1_19	AB_RSEM.txt	TRINITY_DN42913_c2_g1_i3	1294	1017.28	616.78	4.18	7.44	16.38
Phospholipase_A1_19	AB_RSEM.txt	TRINITY_DN42675_c1_g3_i3	966	689.28	381.66	3.81	6.79	19.62
Phospholipase_A1_19	AB_RSEM.txt	TRINITY_DN42675_c1_g3_i10	1468	1191.28	602.27	3.48	6.2	17.92
Phospholipase_A1_19	AB_RSEM.txt	TRINITY_DN42675_c1_g3_i9	3743	3466.28	1735.66	3.45	6.14	17.75
Phospholipase_A1_19	AB_RSEM.txt	TRINITY_DN36408_c0_g1_i2	1629	1352.28	550.58	2.8	5	23.09
Phospholipase_A1_19	AB_RSEM.txt	TRINITY_DN43125_c1_g1_i3	6858	6581.28	2310.41	2.42	4.31	2.91
Phospholipase_A1_19	AB_RSEM.txt	TRINITY_DN42675_c1_g3_i2	2107	1830.28	587.55	2.21	3.94	11.38
Phospholipase_A1_19	AB_RSEM.txt	TRINITY_DN43125_c1_g1_i2	7013	6736.28	2044.58	2.09	3.72	2.51
Phospholipase_A1_19	AB_RSEM.txt	TRINITY_DN42913_c1_g1_i6	398	121.72	37	2.09	3.73	26.85
Phospholipase_A1_19	AB_RSEM.txt	TRINITY_DN36877_c1_g2_i3	774	497.28	138	1.91	3.41	100
Phospholipase_A1_19	AB_RSEM.txt	TRINITY_DN39633_c1_g2_i2	617	340.3	94	1.9	3.39	100
Phospholipase_A1_19	AB_RSEM.txt	TRINITY_DN39348_c0_g1_i4	1641	1364.28	327.8	1.65	2.95	38.21
Phospholipase_A1_19	AB_RSEM.txt	TRINITY_DN43125_c1_g1_i8	6909	6632.28	1298.3	1.35	2.4	1.62
Phospholipase_A1_19	AB_RSEM.txt	TRINITY_DN42913_c2_g1_i4	1295	1018.28	198.49	1.34	2.39	5.27
Phospholipase_A1_19	AB_RSEM.txt	TRINITY_DN36408_c0_g1_i5	1405	1128.28	186.15	1.14	2.02	9.35
Phospholipase_A1_19	AB_RSEM.txt	TRINITY_DN39348_c0_g1_i6	2149	1872.28	306.51	1.13	2.01	26.03
Phospholipase_A1_19	AB_RSEM.txt	TRINITY_DN29149_c0_g1_i1	1196	919.28	132.89	1	1.77	75.72
Phospholipase_A1_19	AB_RSEM.txt	TRINITY_DN39348_c0_g1_i16	2119	1842.28	262.07	0.98	1.75	22.62
Phospholipase_A1_19	AB_RSEM.txt	TRINITY_DN22434_c0_g2_i1	1029	752.28	102.66	0.94	1.67	100
Phospholipase_A1_19	AB_RSEM.txt	TRINITY_DN36408_c0_g1_i4	2027	1750.28	233.28	0.92	1.64	7.56
Phospholipase_A1_19	AB_RSEM.txt	TRINITY_DN42675_c1_g3_i5	3345	3068.28	252.26	0.57	1.01	2.91
Phospholipase_A1_19	AB_RSEM.txt	TRINITY_DN42675_c1_g3_i1	1135	858.28	68.04	0.55	0.97	2.81
Phospholipase_A1_19	AB_RSEM.txt	TRINITY_DN43678_c1_g2_i2	1583	1306.28	98.37	0.52	0.92	8.9
Phospholipase_A1_19	AB_RSEM.txt	TRINITY_DN43678_c1_g2_i3	3282	3005.28	215.79	0.49	0.88	8.49
Phospholipase_A1_19	AB_RSEM.txt	TRINITY_DN43125_c1_g1_i11	6858	6581.28	400.07	0.42	0.75	0.5
Phospholipase_A1_19	AB_RSEM.txt	TRINITY_DN43125_c1_g1_i4	7013	6736.28	367.2	0.38	0.67	0.45
Phospholipase_A1_19	AB_RSEM.txt	TRINITY_DN42179_c0_g2_i3	1601	1324.28	67.24	0.35	0.62	30
Phospholipase_A1_19	AB_RSEM.txt	TRINITY_DN29149_c0_g1_i3	1703	1426.28	66.11	0.32	0.57	24.28
Phospholipase_A1_19	AB_RSEM.txt	TRINITY_DN39348_c0_g1_i5	2277	2000.28	87.81	0.3	0.54	6.98
Phospholipase_A1_19	AB_RSEM.txt	TRINITY_DN42179_c0_g2_i1	1669	1392.28	58.93	0.29	0.52	25.01
Phospholipase_A1_19	AB_RSEM.txt	TRINITY_DN42179_c0_g2_i5	1557	1280.28	53.33	0.29	0.51	24.61
Phospholipase_A1_19	AB_RSEM.txt	TRINITY_DN43125_c1_g1_i6	6909	6632.28	222.69	0.23	0.41	0.28
Phospholipase_A1_19	AB_RSEM.txt	TRINITY_DN39575_c0_g2_i10	1413	1136.28	38.32	0.23	0.41	38.25
Phospholipase_A1_19	AB_RSEM.txt	TRINITY_DN39348_c0_g1_i15	2361	2084.28	54.76	0.18	0.32	4.18
Phospholipase_A1_19	AB_RSEM.txt	TRINITY_DN91928_c0_g1_i1	738	461.28	12	0.18	0.32	100
Phospholipase_A1_19	AB_RSEM.txt	TRINITY_DN43125_c1_g1_i9	2141	1864.28	37.11	0.14	0.24	0.16
Phospholipase_A1_19	AB_RSEM.txt	TRINITY_DN39575_c0_g2_i6	1522	1245.28	22.81	0.13	0.22	20.78
Phospholipase_A1_19	AB_RSEM.txt	TRINITY_DN39348_c0_g1_i11	2391	2114.28	22.96	0.07	0.13	1.73
Phospholipase_A1_19	AB_RSEM.txt	TRINITY_DN39575_c0_g2_i7	1327	1050.28	9.95	0.07	0.12	10.74
Phospholipase_A1_19	AB_RSEM.txt	TRINITY_DN42179_c0_g2_i6	1495	1218.28	5.43	0.03	0.05	2.63
Phospholipase_A1_19	AB_RSEM.txt	TRINITY_DN42179_c0_g2_i7	1563	1286.28	3.13	0.02	0.03	1.44
Phospholipase_A1_19	AB_RSEM.txt	TRINITY_DN39348_c0_g1_i14	1611	1334.28	2.09	0.01	0.02	0.25
Phospholipase_A1_19	AB_RSEM.txt	TRINITY_DN37153_c1_g4_i1	536	259.32	0.5	0.01	0.02	50
Phospholipase_A1_19	AB_RSEM.txt	TRINITY_DN37153_c1_g4_i2	536	259.32	0.5	0.01	0.02	50
Phospholipase_A1_19	AB_RSEM.txt	TRINITY_DN36877_c1_g2_i4	789	512.28	0	0	0	0
Phospholipase_A1_19	AB_RSEM.txt	TRINITY_DN49613_c0_g1_i1	315	49.18	0	0	0	0
Phospholipase_A1_19	AB_RSEM.txt	TRINITY_DN42179_c0_g2_i10	1075	798.28	0	0	0	0
Phospholipase_A1_19	AB_RSEM.txt	TRINITY_DN42179_c0_g2_i11	936	659.28	0	0	0	0
Phospholipase_A1_19	AB_RSEM.txt	TRINITY_DN42179_c0_g2_i4	1663	1386.28	0	0	0	0
Phospholipase_A1_19	AB_RSEM.txt	TRINITY_DN42179_c0_g2_i8	1625	1348.28	0	0	0	0
Phospholipase_A1_19	AB_RSEM.txt	TRINITY_DN42179_c0_g2_i9	1731	1454.28	0	0	0	0
Phospholipase_A1_19	AB_RSEM.txt	TRINITY_DN39348_c0_g1_i2	1711	1434.28	0	0	0	0
Phospholipase_A1_19	AB_RSEM.txt	TRINITY_DN39348_c0_g1_i3	2411	2134.28	0	0	0	0
Phospholipase_A1_19	AB_RSEM.txt	TRINITY_DN39348_c0_g1_i7	2461	2184.28	0	0	0	0
Phospholipase_A1_19	AB_RSEM.txt	TRINITY_DN39348_c0_g1_i8	2189	1912.28	0	0	0	0
Phospholipase_A1_19	AB_RSEM.txt	TRINITY_DN39348_c0_g1_i9	2511	2234.28	0	0	0	0
Phospholipase_A1_19	AB_RSEM.txt	TRINITY_DN39348_c0_g1_i10	2529	2252.28	0	0	0	0
Phospholipase_A1_19	AB_RSEM.txt	TRINITY_DN39348_c0_g1_i13	2219	1942.28	0	0	0	0
Phospholipase_A1_19	AB_RSEM.txt	TRINITY_DN39348_c0_g1_i17	2441	2164.28	0	0	0	0
Phospholipase_A1_19	AB_RSEM.txt	TRINITY_DN5031_c0_g1_i1	340	68.53	0	0	0	0
Phospholipase_A1_19	AB_RSEM.txt	TRINITY_DN28583_c0_g1_i1	586	309.31	0	0	0	0
Phospholipase_A1_19	AB_RSEM.txt	TRINITY_DN42913_c1_g1_i2	501	224.34	0	0	0	0
Phospholipase_A1_19	AB_RSEM.txt	TRINITY_DN42913_c1_g1_i7	501	224.34	0	0	0	0
Phospholipase_A1_19	AB_RSEM.txt	TRINITY_DN42548_c0_g2_i4	893	616.28	0	0	0	0
Phospholipase_A1_19	AB_RSEM.txt	TRINITY_DN42548_c0_g2_i9	976	699.28	0	0	0	0
Phospholipase_A1_19	AB_RSEM.txt	TRINITY_DN42548_c0_g2_i10	926	649.28	0	0	0	0
Phospholipase_A1_19	AB_RSEM.txt	TRINITY_DN42548_c0_g2_i13	843	566.28	0	0	0	0
Phospholipase_A1_19	AB_RSEM.txt	TRINITY_DN5669_c0_g1_i1	308	44.26	0	0	0	0
Phospholipase_A1_19	AB_RSEM.txt	TRINITY_DN42675_c1_g3_i6	3837	3560.28	0	0	0	0
Phospholipase_A1_19	AB_RSEM.txt	TRINITY_DN42675_c1_g3_i8	1009	732.28	0	0	0	0
Phospholipase_A1_19	AB_RSEM.txt	TRINITY_DN39633_c1_g2_i1	671	394.29	0	0	0	0
Phospholipase_A1_19	AB_RSEM.txt	TRINITY_DN39575_c0_g2_i2	1283	1006.28	0	0	0	0
Phospholipase_A1_19	AB_RSEM.txt	TRINITY_DN39575_c0_g2_i3	1259	982.28	0	0	0	0
Phospholipase_A1_19	AB_RSEM.txt	TRINITY_DN39575_c0_g2_i4	1437	1160.28	0	0	0	0
Phospholipase_A1_19	AB_RSEM.txt	TRINITY_DN39575_c0_g2_i8	1478	1201.28	0	0	0	0
Phospholipase_A1_19	AB_RSEM.txt	TRINITY_DN39575_c0_g2_i9	1369	1092.28	0	0	0	0
Phospholipase_A1_19	AB_RSEM.txt	TRINITY_DN39575_c0_g2_i11	1454	1177.28	0	0	0	0
Phospholipase_A1_19	AB_RSEM.txt	TRINITY_DN39575_c0_g2_i12	1496	1219.28	0	0	0	0
Phospholipase_A1_19	AB_RSEM.txt	TRINITY_DN39575_c0_g2_i13	1351	1074.28	0	0	0	0
Phospholipase_A1_19	AB_RSEM.txt	TRINITY_DN39575_c0_g2_i14	1301	1024.28	0	0	0	0
Phospholipase_A2_1	AB_RSEM.txt	TRINITY_DN44209_c0_g1_i3	3329	3052.28	849.53	1.92	3.42	23.89
Phospholipase_A2_1	AB_RSEM.txt	TRINITY_DN44209_c0_g1_i17	2575	2298.28	605.98	1.82	3.24	22.63
Phospholipase_A2_1	AB_RSEM.txt	TRINITY_DN44209_c0_g1_i2	2661	2384.28	416.32	1.2	2.14	14.99
Phospholipase_A2_1	AB_RSEM.txt	TRINITY_DN38757_c0_g1_i1	1376	1099.28	182	1.14	2.03	100
Phospholipase_A2_1	AB_RSEM.txt	TRINITY_DN31915_c0_g1_i1	1403	1126.28	171	1.05	1.86	100
Phospholipase_A2_1	AB_RSEM.txt	TRINITY_DN44209_c0_g1_i5	4112	3835.28	571.84	1.03	1.83	12.8
Phospholipase_A2_1	AB_RSEM.txt	TRINITY_DN44093_c2_g4_i2	556	279.32	27	0.67	1.19	100
Phospholipase_A2_1	AB_RSEM.txt	TRINITY_DN44209_c0_g1_i14	2959	2682.28	253.24	0.65	1.16	8.1
Phospholipase_A2_1	AB_RSEM.txt	TRINITY_DN44093_c2_g4_i1	460	183.36	0	0	0	0
Phospholipase_A2_1	AB_RSEM.txt	TRINITY_DN44093_c2_g4_i5	394	117.81	0	0	0	0
Phospholipase_A2_1	AB_RSEM.txt	TRINITY_DN44209_c0_g1_i7	3390	3113.28	0	0	0	0
Phospholipase_A2_1	AB_RSEM.txt	TRINITY_DN44209_c0_g1_i19	3020	2743.28	0	0	0	0
Plancitoxin-1_1	AB_RSEM.txt	TRINITY_DN34099_c0_g3_i2	1083	806.28	240.67	2.06	3.66	73.54
Plancitoxin-1_1	AB_RSEM.txt	TRINITY_DN34099_c0_g3_i1	1800	1523.28	152.15	0.69	1.23	24.61
Plancitoxin-1_1	AB_RSEM.txt	TRINITY_DN34099_c0_g3_i3	1627	1350.28	10.18	0.05	0.09	1.86
Plancitoxin-1_1	AB_RSEM.txt	TRINITY_DN34099_c0_g2_i1	532	255.32	0	0	0	100
Putative_protein-glutamate_O-methyltransferase_1	AB_RSEM.txt	TRINITY_DN41159_c0_g2_i4	2936	2659.28	838.89	2.17	3.87	68.08
Putative_protein-glutamate_O-methyltransferase_1	AB_RSEM.txt	TRINITY_DN41159_c0_g2_i3	1380	1103.28	134.92	0.84	1.5	26.39
Putative_protein-glutamate_O-methyltransferase_1	AB_RSEM.txt	TRINITY_DN41159_c0_g2_i5	1299	1022.28	26.2	0.18	0.31	5.53
Putative_protein-glutamate_O-methyltransferase_1	AB_RSEM.txt	TRINITY_DN41159_c0_g2_i1	2913	2636.28	0	0	0	0
Putative_protein-glutamate_O-methyltransferase_1	AB_RSEM.txt	TRINITY_DN41159_c0_g2_i2	1276	999.28	0	0	0	0
Serine_proteinase-like_BMK-CBP_1	AB_RSEM.txt	TRINITY_DN43918_c5_g1_i3	2316	2039.28	154.51	0.52	0.93	2.21
Serine_proteinase-like_BMK-CBP_1	AB_RSEM.txt	TRINITY_DN43918_c5_g1_i4	2316	2039.28	154.51	0.52	0.93	2.21
Serine_proteinase-like_BMK-CBP_1	AB_RSEM.txt	TRINITY_DN7792_c0_g2_i1	376	100.56	7	0.48	0.85	100
Serine_proteinase-like_BMK-CBP_1	AB_RSEM.txt	TRINITY_DN43918_c5_g1_i5	1261	984.28	0	0	0	0
Snake_venom_metalloproteinase_Ac1_1	AB_RSEM.txt	TRINITY_DN43602_c0_g6_i5	673	396.29	15.57	0.27	0.48	25.17
Snake_venom_metalloproteinase_Ac1_1	AB_RSEM.txt	TRINITY_DN42586_c0_g1_i3	4814	4537.28	166	0.25	0.45	100
Snake_venom_metalloproteinase_Ac1_1	AB_RSEM.txt	TRINITY_DN43602_c0_g6_i6	753	476.28	0	0	0	0
Snake_venom_metalloproteinase_Ac1_1	AB_RSEM.txt	TRINITY_DN43602_c0_g6_i7	489	212.35	0	0	0	0
Snake_venom_metalloproteinase_fibrolase_19	AB_RSEM.txt	TRINITY_DN40024_c0_g1_i2	2781	2504.28	1501.49	4.13	7.36	92.75
Snake_venom_metalloproteinase_fibrolase_19	AB_RSEM.txt	TRINITY_DN40024_c0_g1_i1	2676	2399.28	112.51	0.32	0.58	7.25
Techylectin-like_protein_1	AB_RSEM.txt	TRINITY_DN27059_c0_g2_i1	1141	864.28	569	4.53	8.08	100
Techylectin-like_protein_1	AB_RSEM.txt	TRINITY_DN33694_c0_g2_i1	1870	1593.28	185	0.8	1.42	100
Thrombin-like_enzyme_ancrod_11	AB_RSEM.txt	TRINITY_DN43367_c0_g1_i6	5578	5301.28	4783.21	6.21	11.07	38.21
Thrombin-like_enzyme_ancrod_11	AB_RSEM.txt	TRINITY_DN43367_c0_g1_i4	6170	5893.28	3935.77	4.6	8.19	28.28
Thrombin-like_enzyme_ancrod_11	AB_RSEM.txt	TRINITY_DN44773_c6_g5_i3	821	544.28	228.73	2.89	5.16	60.45
Thrombin-like_enzyme_ancrod_11	AB_RSEM.txt	TRINITY_DN44847_c4_g1_i10	1041	764.28	80.39	0.72	1.29	9.15
Thrombin-like_enzyme_ancrod_11	AB_RSEM.txt	TRINITY_DN90501_c0_g1_i1	709	432.28	23	0.37	0.65	100
Thrombin-like_enzyme_ancrod_11	AB_RSEM.txt	TRINITY_DN29431_c0_g1_i1	486	209.35	9	0.3	0.53	100
Thrombin-like_enzyme_ancrod_11	AB_RSEM.txt	TRINITY_DN43367_c0_g1_i1	4578	4301.28	163.02	0.26	0.47	1.6
Thrombin-like_enzyme_ancrod_11	AB_RSEM.txt	TRINITY_DN40401_c0_g1_i2	3666	3389.28	82.43	0.17	0.3	1.98
Thrombin-like_enzyme_ancrod_11	AB_RSEM.txt	TRINITY_DN43918_c5_g5_i2	499	222.34	2	0.06	0.11	100
Thrombin-like_enzyme_ancrod_11	AB_RSEM.txt	TRINITY_DN43367_c0_g1_i9	5720	5443.28	13.02	0.02	0.03	0.1
Thrombin-like_enzyme_ancrod_11	AB_RSEM.txt	TRINITY_DN37055_c0_g2_i1	393	116.84	0	0	0	0
Thrombin-like_enzyme_ancrod_11	AB_RSEM.txt	TRINITY_DN43367_c0_g1_i10	343	71.04	0	0	0	0
Thrombin-like_enzyme_ancrod_11	AB_RSEM.txt	TRINITY_DN43367_c0_g1_i3	6237	5960.28	0	0	0	0
Thrombin-like_enzyme_ancrod_11	AB_RSEM.txt	TRINITY_DN40401_c0_g1_i3	1083	806.28	0	0	0	0
Thrombin-like_enzyme_ancrod_11	AB_RSEM.txt	TRINITY_DN40401_c0_g1_i5	3763	3486.28	0	0	0	0
Thrombin-like_enzyme_ancrod_11	AB_RSEM.txt	TRINITY_DN40401_c0_g1_i13	3591	3314.28	0	0	0	0
Thrombin-like_enzyme_ancrod_11	AB_RSEM.txt	TRINITY_DN44839_c3_g4_i4	2816	2539.28	0	0	0	0
Thrombin-like_enzyme_TLBm_1	AB_RSEM.txt	TRINITY_DN37055_c0_g2_i2	839	562.28	20	0.24	0.44	100
Toxin_Bcs_III_15	AB_RSEM.txt	TRINITY_DN41024_c0_g2_i6	658	381.29	30.44	0.55	0.98	5.14
Toxin_Bcs_III_15	AB_RSEM.txt	TRINITY_DN41024_c0_g2_i7	3818	3541.28	221.08	0.43	0.77	4.02
Turripeptide_Ici9	AB_RSEM.txt	TRINITY_DN15551_c0_g1_i1	941	664.28	81	0.84	1.5	100
Venom_allergen_3_30	AB_RSEM.txt	TRINITY_DN44812_c2_g2_i2	517	240.33	31	0.89	1.58	100
Venom_allergen_3_30	AB_RSEM.txt	TRINITY_DN41832_c0_g4_i2	668	391.29	33	0.58	1.03	100
Venom_allergen_3_30	AB_RSEM.txt	TRINITY_DN44812_c2_g3_i1	460	183.36	9	0.34	0.6	100
Venom_allergen_3_30	AB_RSEM.txt	TRINITY_DN33658_c0_g3_i1	312	47.05	0	0	0	0
Venom_allergen_3_30	AB_RSEM.txt	TRINITY_DN44812_c2_g2_i1	615	338.3	0	0	0	0
Venom_allergen_4_1	AB_RSEM.txt	TRINITY_DN39995_c1_g1_i8	481	204.35	0	0	0	0
Venom_allergen_4_1	AB_RSEM.txt	TRINITY_DN44064_c0_g3_i7	342	70.19	0	0	0	0
Venom_allergen_5_1	AB_RSEM.txt	TRINITY_DN41452_c0_g8_i3	1559	1282.28	1096.65	5.89	10.49	69.82
Venom_allergen_5_1	AB_RSEM.txt	TRINITY_DN41452_c0_g8_i8	1789	1512.28	316.33	1.44	2.57	17.08
Venom_allergen_5_1	AB_RSEM.txt	TRINITY_DN41452_c0_g8_i6	1404	1127.28	181.02	1.11	1.97	13.11
Venom_allergen_5_1	AB_RSEM.txt	TRINITY_DN41452_c0_g8_i7	2124	1847.28	0	0	0	0
Venom_allergen_5_15	AB_RSEM.txt	TRINITY_DN51992_c0_g1_i1	300	38.92	0	0	0	0
Venom_peptide_isomerase_heavy_chain_2	AB_RSEM.txt	TRINITY_DN30401_c0_g1_i1	990	713.28	665	6.42	11.44	100
Venom_peptide_isomerase_heavy_chain_2	AB_RSEM.txt	TRINITY_DN38232_c1_g1_i3	1043	766.28	470.62	4.23	7.54	84.24
Venom_peptide_isomerase_heavy_chain_2	AB_RSEM.txt	TRINITY_DN34654_c0_g1_i1	1152	875.28	401	3.16	5.62	100
Venom_peptide_isomerase_heavy_chain_2	AB_RSEM.txt	TRINITY_DN44158_c0_g2_i13	1570	1293.28	453.54	2.42	4.3	25.02
Venom_peptide_isomerase_heavy_chain_2	AB_RSEM.txt	TRINITY_DN30563_c0_g2_i1	1196	919.28	251.32	1.88	3.35	100
Venom_peptide_isomerase_heavy_chain_2	AB_RSEM.txt	TRINITY_DN41899_c0_g3_i2	702	425.28	108.01	1.75	3.12	75.33
Venom_peptide_isomerase_heavy_chain_2	AB_RSEM.txt	TRINITY_DN40401_c0_g1_i12	1180	903.28	196.03	1.49	2.66	17.68
Venom_peptide_isomerase_heavy_chain_2	AB_RSEM.txt	TRINITY_DN44158_c0_g2_i5	2317	2040.28	241.01	0.81	1.45	8.43
Venom_peptide_isomerase_heavy_chain_2	AB_RSEM.txt	TRINITY_DN38232_c1_g1_i4	1638	1361.28	156.38	0.79	1.41	15.76
Venom_peptide_isomerase_heavy_chain_2	AB_RSEM.txt	TRINITY_DN38594_c0_g1_i2	1611	1334.28	148.53	0.77	1.37	6.64
Venom_peptide_isomerase_heavy_chain_2	AB_RSEM.txt	TRINITY_DN40401_c0_g1_i1	3678	3401.28	340.07	0.69	1.23	8.15
Venom_peptide_isomerase_heavy_chain_2	AB_RSEM.txt	TRINITY_DN39691_c0_g1_i6	1253	976.28	65.22	0.46	0.82	8.09
Venom_peptide_isomerase_heavy_chain_2	AB_RSEM.txt	TRINITY_DN41899_c0_g3_i1	702	425.28	19.85	0.32	0.57	13.84
Venom_peptide_isomerase_heavy_chain_2	AB_RSEM.txt	TRINITY_DN36875_c0_g3_i2	445	168.38	6	0.25	0.44	100
Venom_peptide_isomerase_heavy_chain_2	AB_RSEM.txt	TRINITY_DN41899_c0_g3_i5	445	168.38	6.15	0.25	0.45	10.83
Venom_peptide_isomerase_heavy_chain_2	AB_RSEM.txt	TRINITY_DN44158_c0_g2_i3	2593	2316.28	69.65	0.21	0.37	2.15
Venom_peptide_isomerase_heavy_chain_2	AB_RSEM.txt	TRINITY_DN39589_c1_g1_i2	529	252.33	4	0.11	0.19	29.94
Venom_peptide_isomerase_heavy_chain_2	AB_RSEM.txt	TRINITY_DN72107_c0_g1_i1	653	376.29	3	0.05	0.1	100
Venom_peptide_isomerase_heavy_chain_2	AB_RSEM.txt	TRINITY_DN43689_c4_g11_i1	474	197.35	1	0.03	0.06	10.83
Venom_peptide_isomerase_heavy_chain_2	AB_RSEM.txt	TRINITY_DN36875_c0_g3_i3	437	160.39	0	0	0	0
Venom_peptide_isomerase_heavy_chain_2	AB_RSEM.txt	TRINITY_DN30551_c0_g1_i1	1759	1482.28	0	0	0	0
Venom_peptide_isomerase_heavy_chain_2	AB_RSEM.txt	TRINITY_DN30551_c0_g1_i2	1777	1500.28	0	0	0	0
Venom_peptide_isomerase_heavy_chain_2	AB_RSEM.txt	TRINITY_DN38232_c1_g1_i1	1669	1392.28	0	0	0	0
Venom_peptide_isomerase_heavy_chain_2	AB_RSEM.txt	TRINITY_DN44158_c0_g2_i2	2717	2440.28	0	0	0	0
Venom_peptide_isomerase_heavy_chain_2	AB_RSEM.txt	TRINITY_DN40401_c0_g1_i11	3661	3384.28	0	0	0	0
Venom_peptide_isomerase_heavy_chain_2	AB_RSEM.txt	TRINITY_DN40401_c0_g1_i14	3586	3309.28	0	0	0	0
Venom_peptide_isomerase_heavy_chain_2	AB_RSEM.txt	TRINITY_DN18805_c0_g1_i1	419	142.44	0	0	0	0
Venom_peptide_isomerase_heavy_chain_2	AB_RSEM.txt	TRINITY_DN41899_c0_g3_i3	445	168.38	0	0	0	0
Venom_peptide_isomerase_heavy_chain_2	AB_RSEM.txt	TRINITY_DN26795_c0_g1_i1	356	82.3	0	0	0	0
Venom_peptide_isomerase_heavy_chain_2	AB_RSEM.txt	TRINITY_DN44773_c6_g5_i4	602	325.3	0	0	0	0
Venom_peptide_isomerase_heavy_chain_2	AB_RSEM.txt	TRINITY_DN39691_c0_g1_i2	1410	1133.28	0	0	0	0
Venom_protein_55	AB_RSEM.txt	TRINITY_DN37059_c0_g1_i1	3391	3114.28	4961.78	10.97	19.55	100
Venom_protein_55	AB_RSEM.txt	TRINITY_DN37059_c0_g2_i1	1027	750.28	3.22	0.03	0.05	100
Venom_prothrombin_activator_pseutarin-C_catalytic_subunit_12	AB_RSEM.txt	TRINITY_DN44976_c4_g7_i2	372	96.82	40	2.85	5.07	96.42
Venom_prothrombin_activator_pseutarin-C_catalytic_subunit_12	AB_RSEM.txt	TRINITY_DN44773_c6_g5_i1	511	234.33	62.11	1.83	3.25	38.13
Venom_prothrombin_activator_pseutarin-C_catalytic_subunit_12	AB_RSEM.txt	TRINITY_DN41899_c0_g1_i4	1094	817.28	214.62	1.81	3.22	59.24
Venom_prothrombin_activator_pseutarin-C_catalytic_subunit_12	AB_RSEM.txt	TRINITY_DN44158_c0_g2_i16	1653	1376.28	329.01	1.65	2.93	17.06
Venom_prothrombin_activator_pseutarin-C_catalytic_subunit_12	AB_RSEM.txt	TRINITY_DN41087_c0_g1_i3	1260	983.28	206.16	1.44	2.57	58.53
Venom_prothrombin_activator_pseutarin-C_catalytic_subunit_12	AB_RSEM.txt	TRINITY_DN44773_c6_g6_i1	511	234.33	17	0.5	0.89	100
Venom_prothrombin_activator_pseutarin-C_catalytic_subunit_12	AB_RSEM.txt	TRINITY_DN41899_c0_g1_i3	502	225.34	14.88	0.45	0.81	14.9
Venom_prothrombin_activator_pseutarin-C_catalytic_subunit_12	AB_RSEM.txt	TRINITY_DN41087_c0_g1_i6	2169	1892.28	109.3	0.4	0.71	16.13
Venom_prothrombin_activator_pseutarin-C_catalytic_subunit_12	AB_RSEM.txt	TRINITY_DN44158_c0_g2_i18	1463	1186.28	63.49	0.37	0.66	3.82
Venom_prothrombin_activator_pseutarin-C_catalytic_subunit_12	AB_RSEM.txt	TRINITY_DN41087_c0_g1_i2	2075	1798.28	90.88	0.35	0.62	14.11
Venom_prothrombin_activator_pseutarin-C_catalytic_subunit_12	AB_RSEM.txt	TRINITY_DN23446_c0_g2_i1	774	497.28	15	0.21	0.37	100
Venom_prothrombin_activator_pseutarin-C_catalytic_subunit_12	AB_RSEM.txt	TRINITY_DN41087_c0_g1_i5	2086	1809.28	42.54	0.16	0.29	6.56
Venom_prothrombin_activator_pseutarin-C_catalytic_subunit_12	AB_RSEM.txt	TRINITY_DN37055_c0_g1_i1	414	137.48	2.5	0.13	0.22	22.39
Venom_prothrombin_activator_pseutarin-C_catalytic_subunit_12	AB_RSEM.txt	TRINITY_DN37055_c0_g1_i2	414	137.48	2.5	0.13	0.22	22.39
Venom_prothrombin_activator_pseutarin-C_catalytic_subunit_12	AB_RSEM.txt	TRINITY_DN41087_c0_g1_i4	1241	964.28	16.12	0.12	0.21	4.67
Venom_prothrombin_activator_pseutarin-C_catalytic_subunit_12	AB_RSEM.txt	TRINITY_DN43689_c4_g11_i3	430	153.4	0	0	0	0
Venom_prothrombin_activator_pseutarin-C_catalytic_subunit_12	AB_RSEM.txt	TRINITY_DN43238_c0_g2_i1	691	414.29	0	0	0	0
Venom_prothrombin_activator_pseutarin-C_catalytic_subunit_12	AB_RSEM.txt	TRINITY_DN44158_c0_g2_i7	2800	2523.28	0	0	0	0
Venom_prothrombin_activator_pseutarin-C_catalytic_subunit_12	AB_RSEM.txt	TRINITY_DN44158_c0_g2_i15	2400	2123.28	0	0	0	0
Venom_prothrombin_activator_pseutarin-C_catalytic_subunit_12	AB_RSEM.txt	TRINITY_DN44158_c0_g2_i17	2676	2399.28	0.01	0	0	0
Venom_prothrombin_activator_pseutarin-C_catalytic_subunit_12	AB_RSEM.txt	TRINITY_DN44300_c0_g4_i1	895	618.28	0	0	0	0
Venom_prothrombin_activator_pseutarin-C_catalytic_subunit_12	AB_RSEM.txt	TRINITY_DN44300_c0_g4_i3	389	112.97	0	0	0	0
Venom_prothrombin_activator_pseutarin-C_catalytic_subunit_12	AB_RSEM.txt	TRINITY_DN44773_c6_g5_i2	525	248.33	0	0	0	0
Venom_prothrombin_activator_pseutarin-C_catalytic_subunit_12	AB_RSEM.txt	TRINITY_DN44839_c3_g4_i1	3036	2759.28	0	0	0	0
Venom_prothrombin_activator_pseutarin-C_catalytic_subunit_12	AB_RSEM.txt	TRINITY_DN44976_c4_g7_i1	368	93.11	0	0	0	0
Venom_prothrombin_activator_pseutarin-C_catalytic_subunit_12	AB_RSEM.txt	TRINITY_DN44976_c4_g7_i10	241	10.4	0	0	0	0
Venom_prothrombin_activator_pseutarin-C_catalytic_subunit_12	AB_RSEM.txt	TRINITY_DN44976_c4_g7_i11	368	93.11	0	0	0	0
Venom_prothrombin_activator_pseutarin-C_catalytic_subunit_12	AB_RSEM.txt	TRINITY_DN44976_c4_g7_i3	371	95.89	0	0	0	0
Venom_prothrombin_activator_pseutarin-C_catalytic_subunit_12	AB_RSEM.txt	TRINITY_DN44976_c4_g7_i4	379	103.4	0	0	0	0
Venom_prothrombin_activator_pseutarin-C_catalytic_subunit_12	AB_RSEM.txt	TRINITY_DN44976_c4_g7_i7	371	95.89	0	0	0	0
Venom_prothrombin_activator_pseutarin-C_catalytic_subunit_12	AB_RSEM.txt	TRINITY_DN43751_c1_g1_i11	364	89.46	0	0	0	0
Venom_prothrombin_activator_pseutarin-C_catalytic_subunit_12	AB_RSEM.txt	TRINITY_DN43751_c1_g1_i17	416	139.46	0	0	0	0
Zinc_metalloproteinase@disintegrin_107	AB_RSEM.txt	TRINITY_DN40924_c0_g1_i1	2642	2365.28	441.39	1.29	2.29	50.29
Zinc_metalloproteinase@disintegrin_107	AB_RSEM.txt	TRINITY_DN40924_c0_g1_i5	3092	2815.28	201.67	0.49	0.88	19.31
Zinc_metalloproteinase@disintegrin_107	AB_RSEM.txt	TRINITY_DN40924_c0_g1_i7	3156	2879.28	170.07	0.41	0.72	15.92
Zinc_metalloproteinase@disintegrin_107	AB_RSEM.txt	TRINITY_DN40924_c0_g1_i4	2706	2429.28	71.06	0.2	0.36	7.88
Zinc_metalloproteinase@disintegrin_107	AB_RSEM.txt	TRINITY_DN44096_c0_g1_i1	1596	1319.28	36.67	0.19	0.34	26.67
Zinc_metalloproteinase@disintegrin_107	AB_RSEM.txt	TRINITY_DN40924_c0_g1_i13	2721	2444.28	59.81	0.17	0.3	6.6
Zinc_metalloproteinase@disintegrin_107	AB_RSEM.txt	TRINITY_DN40924_c0_g1_i10	371	95.89	0	0	0	0
Zinc_metalloproteinase@disintegrin_107	AB_RSEM.txt	TRINITY_DN40924_c0_g1_i11	3192	2915.28	0	0	0	0
Zinc_metalloproteinase@disintegrin_107	AB_RSEM.txt	TRINITY_DN40924_c0_g1_i12	721	444.28	0	0	0	0
Zinc_metalloproteinase@disintegrin_107	AB_RSEM.txt	TRINITY_DN40924_c0_g1_i3	2742	2465.28	0	0	0	0
Zinc_metalloproteinase@disintegrin_107	AB_RSEM.txt	TRINITY_DN40924_c0_g1_i8	2806	2529.28	0	0	0	0
Zinc_metalloproteinase-disintegrin-like_alternagin_2	AB_RSEM.txt	TRINITY_DN40924_c0_g1_i2	1576	1299.28	0	0	0	0
Zinc_metalloproteinase-disintegrin-like_alternagin_2	AB_RSEM.txt	TRINITY_DN40924_c0_g1_i6	1426	1149.28	0	0	0	0
Zinc_metalloproteinase-disintegrin-like_VAP2B_272	AB_RSEM.txt	TRINITY_DN43826_c0_g5_i4	2041	1764.28	161.9	0.63	1.13	52.34
Zinc_metalloproteinase-disintegrin-like_VAP2B_272	AB_RSEM.txt	TRINITY_DN43826_c0_g5_i3	3999	3722.28	311.1	0.58	1.03	47.66
Zinc_metalloproteinase-disintegrin-like_VAP2B_272	AB_RSEM.txt	TRINITY_DN43826_c0_g5_i2	2227	1950.28	0	0	0	0
Zinc_metalloproteinase-disintegrin-like_VAP2B_272	AB_RSEM.txt	TRINITY_DN43826_c0_g5_i5	3319	3042.28	0	0	0	0
Zinc_metalloproteinase-disintegrin-like_VAP2B_272	AB_RSEM.txt	TRINITY_DN43826_c0_g5_i6	3505	3228.28	0	0	0	0
Acetylcholinesterase-1_1	VG_RSEM.txt	TRINITY_DN31030_c0_g2_i1	457	217.92	44.07	2.4	4.8	100
Acetylcholinesterase-1_1	VG_RSEM.txt	TRINITY_DN41757_c0_g1_i7	2099	1859.88	364.15	2.33	4.65	72.16
Acetylcholinesterase-1_1	VG_RSEM.txt	TRINITY_DN43664_c0_g6_i8	674	434.89	34.37	0.94	1.88	24.33
Acetylcholinesterase-1_1	VG_RSEM.txt	TRINITY_DN43159_c0_g5_i2	698	458.88	31	0.8	1.6	50
Acetylcholinesterase-1_1	VG_RSEM.txt	TRINITY_DN38135_c0_g2_i9	1563	1323.88	52.96	0.48	0.95	35.15
Acetylcholinesterase-1_1	VG_RSEM.txt	TRINITY_DN40528_c0_g3_i1	1485	1245.88	47	0.45	0.9	100
Acetylcholinesterase-1_1	VG_RSEM.txt	TRINITY_DN43664_c0_g6_i13	767	527.88	17.1	0.39	0.77	9.97
Acetylcholinesterase-1_1	VG_RSEM.txt	TRINITY_DN41757_c0_g1_i4	2173	1933.88	59.55	0.37	0.73	11.35
Acetylcholinesterase-1_1	VG_RSEM.txt	TRINITY_DN43664_c0_g6_i6	950	710.88	19.83	0.33	0.66	8.58
Acetylcholinesterase-1_1	VG_RSEM.txt	TRINITY_DN34158_c0_g6_i3	646	406.89	11.18	0.33	0.65	50.69
Acetylcholinesterase-1_1	VG_RSEM.txt	TRINITY_DN27511_c0_g1_i2	2839	2599.88	70.46	0.32	0.64	62.89
Acetylcholinesterase-1_1	VG_RSEM.txt	TRINITY_DN38093_c0_g1_i7	967	727.88	15.4	0.25	0.5	12.1
Acetylcholinesterase-1_1	VG_RSEM.txt	TRINITY_DN43664_c0_g6_i11	788	548.88	10.3	0.22	0.45	5.78
Acetylcholinesterase-1_1	VG_RSEM.txt	TRINITY_DN38135_c0_g2_i10	1924	1684.88	30.81	0.22	0.43	16.07
Acetylcholinesterase-1_1	VG_RSEM.txt	TRINITY_DN41757_c0_g1_i2	2259	2019.88	34.41	0.2	0.4	6.28
Acetylcholinesterase-1_1	VG_RSEM.txt	TRINITY_DN11582_c0_g2_i1	600	360.89	6	0.2	0.39	100
Acetylcholinesterase-1_1	VG_RSEM.txt	TRINITY_DN27511_c0_g1_i1	1523	1283.88	20.54	0.19	0.38	37.11
Acetylcholinesterase-1_1	VG_RSEM.txt	TRINITY_DN38135_c0_g2_i4	1960	1720.88	25.9	0.18	0.36	13.23
Acetylcholinesterase-1_1	VG_RSEM.txt	TRINITY_DN41757_c0_g1_i8	2261	2021.88	29.34	0.17	0.34	5.35
Acetylcholinesterase-1_1	VG_RSEM.txt	TRINITY_DN40584_c1_g1_i6	2440	2200.88	31.68	0.17	0.34	32.22
Acetylcholinesterase-1_1	VG_RSEM.txt	TRINITY_DN34158_c0_g6_i4	1818	1578.88	21.83	0.16	0.33	25.51
Acetylcholinesterase-1_1	VG_RSEM.txt	TRINITY_DN40584_c1_g1_i8	1771	1531.88	17.45	0.14	0.27	25.49
Acetylcholinesterase-1_1	VG_RSEM.txt	TRINITY_DN70822_c0_g1_i1	609	369.89	4	0.13	0.26	100
Acetylcholinesterase-1_1	VG_RSEM.txt	TRINITY_DN33151_c0_g1_i1	1002	762.88	8	0.12	0.25	100
Acetylcholinesterase-1_1	VG_RSEM.txt	TRINITY_DN41757_c0_g1_i5	2335	2095.88	18.81	0.11	0.21	3.31
Acetylcholinesterase-1_1	VG_RSEM.txt	TRINITY_DN40584_c1_g1_i7	1247	1007.88	7.18	0.08	0.17	15.95
Acetylcholinesterase-1_1	VG_RSEM.txt	TRINITY_DN40584_c1_g1_i10	1406	1166.88	8.13	0.08	0.17	15.6
Acetylcholinesterase-1_1	VG_RSEM.txt	TRINITY_DN44380_c2_g1_i1	981	741.88	5	0.08	0.16	100
Acetylcholinesterase-1_1	VG_RSEM.txt	TRINITY_DN25525_c0_g1_i1	477	237.92	1	0.05	0.1	100
Acetylcholinesterase-1_1	VG_RSEM.txt	TRINITY_DN40584_c1_g1_i2	2838	2598.88	7.9	0.04	0.07	6.81
Acetylcholinesterase-1_1	VG_RSEM.txt	TRINITY_DN41757_c0_g1_i3	2421	2181.88	4.65	0.03	0.05	0.79
Acetylcholinesterase-1_1	VG_RSEM.txt	TRINITY_DN41757_c0_g1_i6	2185	1945.88	4.05	0.02	0.05	0.77
Acetylcholinesterase-1_1	VG_RSEM.txt	TRINITY_DN40584_c1_g1_i9	2314	2074.88	3.64	0.02	0.04	3.93
Acetylcholinesterase-1_1	VG_RSEM.txt	TRINITY_DN41757_c0_g1_i1	2347	2107.88	0.04	0	0	0.01
Acetylcholinesterase-1_1	VG_RSEM.txt	TRINITY_DN43664_c0_g6_i3	874	634.88	0	0	0	0
Acetylcholinesterase-1_1	VG_RSEM.txt	TRINITY_DN43664_c0_g6_i4	857	617.88	0	0	0	0
Acetylcholinesterase-1_1	VG_RSEM.txt	TRINITY_DN43664_c0_g6_i5	1927	1687.88	0	0	0	0
Acetylcholinesterase-1_1	VG_RSEM.txt	TRINITY_DN43664_c0_g6_i7	885	645.88	0	0	0	0
Acetylcholinesterase-1_1	VG_RSEM.txt	TRINITY_DN43664_c0_g6_i9	853	613.88	0	0	0	0
Acetylcholinesterase-1_1	VG_RSEM.txt	TRINITY_DN43664_c0_g6_i10	760	520.88	0	0	0	0
Acetylcholinesterase-1_1	VG_RSEM.txt	TRINITY_DN43664_c0_g6_i14	1830	1590.88	0	0	0	0
Acetylcholinesterase-1_1	VG_RSEM.txt	TRINITY_DN43664_c0_g6_i16	771	531.88	0	0	0	0
Acetylcholinesterase-1_1	VG_RSEM.txt	TRINITY_DN43664_c0_g6_i17	1916	1676.88	0	0	0	0
Acetylcholinesterase-1_1	VG_RSEM.txt	TRINITY_DN43664_c0_g6_i18	864	624.88	0	0	0	0
Acetylcholinesterase-1_1	VG_RSEM.txt	TRINITY_DN43664_c0_g6_i19	1923	1683.88	0	0	0	0
Acetylcholinesterase-1_1	VG_RSEM.txt	TRINITY_DN43664_c0_g6_i20	2013	1773.88	0	0	0	0
Acetylcholinesterase-1_1	VG_RSEM.txt	TRINITY_DN43664_c0_g6_i21	2009	1769.88	0	0	0	0
Acetylcholinesterase-1_1	VG_RSEM.txt	TRINITY_DN11712_c0_g1_i1	376	137.35	0	0	0	0
Acetylcholinesterase-1_1	VG_RSEM.txt	TRINITY_DN11712_c0_g2_i1	362	123.71	0	0	0	0
Acetylcholinesterase-1_1	VG_RSEM.txt	TRINITY_DN34474_c0_g2_i1	396	157.07	0	0	0	0
Acetylcholinesterase-1_1	VG_RSEM.txt	TRINITY_DN40584_c1_g1_i3	1916	1676.88	0.01	0	0	0.01
Acetylcholinesterase-1_1	VG_RSEM.txt	TRINITY_DN40584_c1_g1_i4	1645	1405.88	0	0	0	0
Acetylcholinesterase-1_1	VG_RSEM.txt	TRINITY_DN40584_c1_g1_i5	2169	1929.88	0	0	0	0
Acetylcholinesterase-1_1	VG_RSEM.txt	TRINITY_DN38093_c0_g1_i2	5317	5077.88	0	0	0	0
Acetylcholinesterase-1_1	VG_RSEM.txt	TRINITY_DN38093_c0_g1_i3	5317	5077.88	0	0	0	0
Acetylcholinesterase-1_1	VG_RSEM.txt	TRINITY_DN38093_c0_g1_i5	5177	4937.88	0	0	0	0
Acetylcholinesterase-1_1	VG_RSEM.txt	TRINITY_DN38093_c0_g1_i10	5177	4937.88	0	0	0	0
Acetylcholinesterase-1_1	VG_RSEM.txt	TRINITY_DN38093_c0_g1_i11	509	269.91	0	0	0	0
Acetylcholinesterase-1_1	VG_RSEM.txt	TRINITY_DN31778_c0_g1_i1	1104	864.88	0	0	0	0
Acetylcholinesterase-1_1	VG_RSEM.txt	TRINITY_DN31778_c0_g1_i2	757	517.88	0	0	0	0
Acetylcholinesterase-1_1	VG_RSEM.txt	TRINITY_DN38135_c0_g2_i2	2252	2012.88	0	0	0	0
Acetylcholinesterase-1_1	VG_RSEM.txt	TRINITY_DN38135_c0_g2_i6	2436	2196.88	0	0	0	0
Acetylcholinesterase-1_1	VG_RSEM.txt	TRINITY_DN38135_c0_g2_i7	2144	1904.88	0	0	0	0
Acetylcholinesterase-1_1	VG_RSEM.txt	TRINITY_DN38135_c0_g2_i8	2216	1976.88	0	0	0	0
Acetylcholinesterase-1_1	VG_RSEM.txt	TRINITY_DN34158_c0_g6_i1	2038	1798.88	0	0	0	0
Acetylcholinesterase-1_1	VG_RSEM.txt	TRINITY_DN11582_c0_g1_i1	601	361.89	0	0	0	0
Acetylcholinesterase-1_1	VG_RSEM.txt	TRINITY_DN64206_c0_g1_i1	328	91.49	0	0	0	0
Alpha-amylase_1	VG_RSEM.txt	TRINITY_DN44359_c1_g2_i1	1663	1423.88	7	0.06	0.12	100
Alpha-amylase_1	VG_RSEM.txt	TRINITY_DN91533_c0_g1_i1	606	366.89	2	0.06	0.13	100
Alpha-latroinsectotoxin-Lt1a_2	VG_RSEM.txt	TRINITY_DN44347_c0_g5_i2	362	123.71	166.33	15.98	31.92	89.83
Alpha-latroinsectotoxin-Lt1a_2	VG_RSEM.txt	TRINITY_DN43295_c1_g10_i1	892	652.88	849.59	15.47	30.89	89.71
Alpha-latroinsectotoxin-Lt1a_2	VG_RSEM.txt	TRINITY_DN44347_c0_g12_i1	774	534.88	690	15.34	30.63	100
Alpha-latroinsectotoxin-Lt1a_2	VG_RSEM.txt	TRINITY_DN41713_c1_g2_i3	2294	2054.88	2645.58	15.31	30.57	75.14
Alpha-latroinsectotoxin-Lt1a_2	VG_RSEM.txt	TRINITY_DN44347_c0_g6_i2	636	396.89	469.13	14.05	28.06	96.39
Alpha-latroinsectotoxin-Lt1a_2	VG_RSEM.txt	TRINITY_DN44798_c3_g3_i2	3922	3682.88	4167.57	13.45	26.87	50.83
Alpha-latroinsectotoxin-Lt1a_2	VG_RSEM.txt	TRINITY_DN43784_c3_g3_i3	3546	3306.88	2952.81	10.61	21.2	61.11
Alpha-latroinsectotoxin-Lt1a_2	VG_RSEM.txt	TRINITY_DN37932_c0_g1_i1	663	423.89	368	10.32	20.61	100
Alpha-latroinsectotoxin-Lt1a_2	VG_RSEM.txt	TRINITY_DN44681_c2_g2_i2	1382	1142.88	758.64	7.89	15.76	61.89
Alpha-latroinsectotoxin-Lt1a_2	VG_RSEM.txt	TRINITY_DN44347_c0_g2_i11	2721	2481.88	1398.28	6.7	13.38	43.95
Alpha-latroinsectotoxin-Lt1a_2	VG_RSEM.txt	TRINITY_DN43901_c0_g5_i2	345	107.41	58.28	6.45	12.88	89.65
Alpha-latroinsectotoxin-Lt1a_2	VG_RSEM.txt	TRINITY_DN37932_c0_g4_i4	2108	1868.88	809.81	5.15	10.29	66.9
Alpha-latroinsectotoxin-Lt1a_2	VG_RSEM.txt	TRINITY_DN37803_c0_g2_i4	2188	1948.88	839.72	5.12	10.23	84.54
Alpha-latroinsectotoxin-Lt1a_2	VG_RSEM.txt	TRINITY_DN43288_c0_g10_i2	3737	3497.88	1459.89	4.96	9.91	70.11
Alpha-latroinsectotoxin-Lt1a_2	VG_RSEM.txt	TRINITY_DN43901_c0_g7_i1	1044	804.88	287.41	4.24	8.48	98.92
Alpha-latroinsectotoxin-Lt1a_2	VG_RSEM.txt	TRINITY_DN43901_c0_g8_i2	582	342.9	114.83	3.98	7.95	47.99
Alpha-latroinsectotoxin-Lt1a_2	VG_RSEM.txt	TRINITY_DN43327_c1_g8_i1	1328	1088.88	358.83	3.92	7.82	82.74
Alpha-latroinsectotoxin-Lt1a_2	VG_RSEM.txt	TRINITY_DN44798_c3_g3_i10	4094	3854.88	1101.55	3.4	6.78	12.83
Alpha-latroinsectotoxin-Lt1a_2	VG_RSEM.txt	TRINITY_DN39210_c0_g1_i3	2436	2196.88	586.7	3.17	6.34	92
Alpha-latroinsectotoxin-Lt1a_2	VG_RSEM.txt	TRINITY_DN41834_c0_g1_i1	979	739.88	160.67	2.58	5.16	86.72
Alpha-latroinsectotoxin-Lt1a_2	VG_RSEM.txt	TRINITY_DN41883_c4_g1_i9	2817	2577.88	493.09	2.27	4.54	30.77
Alpha-latroinsectotoxin-Lt1a_2	VG_RSEM.txt	TRINITY_DN43784_c3_g3_i4	4536	4296.88	818.39	2.26	4.52	13.03
Alpha-latroinsectotoxin-Lt1a_2	VG_RSEM.txt	TRINITY_DN43901_c0_g8_i4	843	603.88	113.02	2.22	4.44	26.82
Alpha-latroinsectotoxin-Lt1a_2	VG_RSEM.txt	TRINITY_DN42748_c0_g1_i14	2997	2757.88	498.23	2.15	4.29	60.65
Alpha-latroinsectotoxin-Lt1a_2	VG_RSEM.txt	TRINITY_DN44741_c0_g1_i11	3822	3582.88	635.97	2.11	4.21	20.39
Alpha-latroinsectotoxin-Lt1a_2	VG_RSEM.txt	TRINITY_DN41788_c0_g3_i1	970	730.88	121	1.97	3.93	100
Alpha-latroinsectotoxin-Lt1a_2	VG_RSEM.txt	TRINITY_DN42544_c1_g4_i3	1341	1101.88	176.52	1.9	3.8	55.21
Alpha-latroinsectotoxin-Lt1a_2	VG_RSEM.txt	TRINITY_DN44741_c0_g1_i5	1638	1398.88	215.32	1.83	3.65	17.69
Alpha-latroinsectotoxin-Lt1a_2	VG_RSEM.txt	TRINITY_DN44347_c0_g5_i1	401	162.03	24.67	1.81	3.61	10.17
Alpha-latroinsectotoxin-Lt1a_2	VG_RSEM.txt	TRINITY_DN43533_c0_g2_i4	1295	1055.88	159.4	1.79	3.58	52.95
Alpha-latroinsectotoxin-Lt1a_2	VG_RSEM.txt	TRINITY_DN43784_c3_g3_i1	4530	4290.88	613.54	1.7	3.39	9.79
Alpha-latroinsectotoxin-Lt1a_2	VG_RSEM.txt	TRINITY_DN37932_c0_g4_i6	2156	1916.88	251.97	1.56	3.12	20.29
Alpha-latroinsectotoxin-Lt1a_2	VG_RSEM.txt	TRINITY_DN41713_c1_g2_i9	1683	1443.88	188.29	1.55	3.1	7.61
Alpha-latroinsectotoxin-Lt1a_2	VG_RSEM.txt	TRINITY_DN43205_c0_g3_i10	3014	2774.88	357.7	1.53	3.06	34.38
Alpha-latroinsectotoxin-Lt1a_2	VG_RSEM.txt	TRINITY_DN44798_c3_g3_i4	4010	3770.88	469.88	1.48	2.96	5.6
Alpha-latroinsectotoxin-Lt1a_2	VG_RSEM.txt	TRINITY_DN44885_c3_g1_i12	2258	2018.88	248.18	1.46	2.92	22.97
Alpha-latroinsectotoxin-Lt1a_2	VG_RSEM.txt	TRINITY_DN43295_c1_g10_i4	892	652.88	77.24	1.41	2.81	8.16
Alpha-latroinsectotoxin-Lt1a_2	VG_RSEM.txt	TRINITY_DN41883_c4_g1_i6	3855	3615.88	393.13	1.29	2.58	17.49
Alpha-latroinsectotoxin-Lt1a_2	VG_RSEM.txt	TRINITY_DN43969_c0_g3_i4	2929	2689.88	285.94	1.26	2.52	31.23
Alpha-latroinsectotoxin-Lt1a_2	VG_RSEM.txt	TRINITY_DN43978_c0_g1_i22	7245	7005.88	726.36	1.23	2.46	17.8
Alpha-latroinsectotoxin-Lt1a_2	VG_RSEM.txt	TRINITY_DN41883_c4_g1_i12	1032	792.88	77.57	1.16	2.32	15.74
Alpha-latroinsectotoxin-Lt1a_2	VG_RSEM.txt	TRINITY_DN44347_c0_g2_i17	2612	2372.88	230.16	1.15	2.3	7.57
Alpha-latroinsectotoxin-Lt1a_2	VG_RSEM.txt	TRINITY_DN43822_c0_g2_i2	1157	917.88	87	1.13	2.25	100
Alpha-latroinsectotoxin-Lt1a_2	VG_RSEM.txt	TRINITY_DN43978_c0_g1_i21	7477	7237.88	637.81	1.05	2.09	15.13
Alpha-latroinsectotoxin-Lt1a_2	VG_RSEM.txt	TRINITY_DN44140_c1_g1_i3	520	280.91	23.51	0.99	1.99	69.28
Alpha-latroinsectotoxin-Lt1a_2	VG_RSEM.txt	TRINITY_DN33960_c0_g1_i1	2527	2287.88	187	0.97	1.94	100
Alpha-latroinsectotoxin-Lt1a_2	VG_RSEM.txt	TRINITY_DN44741_c0_g1_i10	1364	1124.88	90.94	0.96	1.92	9.29
Alpha-latroinsectotoxin-Lt1a_2	VG_RSEM.txt	TRINITY_DN41713_c1_g2_i1	2742	2502.88	197.65	0.94	1.87	4.61
Alpha-latroinsectotoxin-Lt1a_2	VG_RSEM.txt	TRINITY_DN41713_c1_g2_i4	2009	1769.88	126.76	0.85	1.7	4.18
Alpha-latroinsectotoxin-Lt1a_2	VG_RSEM.txt	TRINITY_DN43395_c0_g6_i3	2677	2437.88	174.59	0.85	1.7	19.1
Alpha-latroinsectotoxin-Lt1a_2	VG_RSEM.txt	TRINITY_DN43637_c1_g3_i2	630	390.89	27.65	0.84	1.68	63.18
Alpha-latroinsectotoxin-Lt1a_2	VG_RSEM.txt	TRINITY_DN43822_c0_g5_i1	1518	1278.88	89.95	0.84	1.67	48.77
Alpha-latroinsectotoxin-Lt1a_2	VG_RSEM.txt	TRINITY_DN43978_c0_g1_i3	1654	1414.88	93.22	0.78	1.56	11.31
Alpha-latroinsectotoxin-Lt1a_2	VG_RSEM.txt	TRINITY_DN39831_c0_g1_i2	3931	3691.88	243.53	0.78	1.57	38.24
Alpha-latroinsectotoxin-Lt1a_2	VG_RSEM.txt	TRINITY_DN44885_c3_g1_i2	4923	4683.88	309.16	0.78	1.57	12.33
Alpha-latroinsectotoxin-Lt1a_2	VG_RSEM.txt	TRINITY_DN41713_c1_g2_i8	2377	2137.88	138.97	0.77	1.54	3.79
Alpha-latroinsectotoxin-Lt1a_2	VG_RSEM.txt	TRINITY_DN43205_c0_g3_i25	3104	2864.88	178.06	0.74	1.48	16.57
Alpha-latroinsectotoxin-Lt1a_2	VG_RSEM.txt	TRINITY_DN42544_c1_g4_i2	1874	1634.88	98.02	0.71	1.42	20.66
Alpha-latroinsectotoxin-Lt1a_2	VG_RSEM.txt	TRINITY_DN42544_c1_g4_i4	1874	1634.88	97.67	0.71	1.42	20.59
Alpha-latroinsectotoxin-Lt1a_2	VG_RSEM.txt	TRINITY_DN41883_c4_g1_i3	3852	3612.88	211.77	0.7	1.39	9.43
Alpha-latroinsectotoxin-Lt1a_2	VG_RSEM.txt	TRINITY_DN41713_c1_g2_i7	2604	2364.88	137.92	0.69	1.38	3.4
Alpha-latroinsectotoxin-Lt1a_2	VG_RSEM.txt	TRINITY_DN44885_c3_g1_i10	1045	805.88	44.53	0.66	1.31	10.32
Alpha-latroinsectotoxin-Lt1a_2	VG_RSEM.txt	TRINITY_DN44885_c3_g1_i3	5074	4834.88	261.54	0.64	1.28	10.11
Alpha-latroinsectotoxin-Lt1a_2	VG_RSEM.txt	TRINITY_DN39965_c0_g2_i2	1291	1051.88	53.54	0.61	1.21	66.08
Alpha-latroinsectotoxin-Lt1a_2	VG_RSEM.txt	TRINITY_DN43189_c0_g3_i2	703	463.88	23.6	0.6	1.21	38.74
Alpha-latroinsectotoxin-Lt1a_2	VG_RSEM.txt	TRINITY_DN41883_c4_g1_i1	1006	766.88	37.85	0.59	1.17	7.94
Alpha-latroinsectotoxin-Lt1a_2	VG_RSEM.txt	TRINITY_DN43978_c0_g1_i11	2735	2495.88	120.87	0.58	1.15	8.31
Alpha-latroinsectotoxin-Lt1a_2	VG_RSEM.txt	TRINITY_DN43327_c1_g8_i2	1429	1189.88	58.52	0.58	1.17	12.35
Alpha-latroinsectotoxin-Lt1a_2	VG_RSEM.txt	TRINITY_DN44347_c0_g2_i13	1280	1040.88	51.04	0.58	1.16	3.82
Alpha-latroinsectotoxin-Lt1a_2	VG_RSEM.txt	TRINITY_DN37803_c0_g2_i1	2262	2022.88	96.21	0.57	1.13	9.33
Alpha-latroinsectotoxin-Lt1a_2	VG_RSEM.txt	TRINITY_DN37932_c0_g4_i5	2177	1937.88	93.31	0.57	1.14	7.43
Alpha-latroinsectotoxin-Lt1a_2	VG_RSEM.txt	TRINITY_DN19924_c0_g1_i1	1124	884.88	41.3	0.55	1.11	100
Alpha-latroinsectotoxin-Lt1a_2	VG_RSEM.txt	TRINITY_DN42748_c0_g1_i13	3073	2833.88	128.12	0.54	1.07	15.18
Alpha-latroinsectotoxin-Lt1a_2	VG_RSEM.txt	TRINITY_DN44347_c0_g6_i1	710	470.88	20.87	0.53	1.05	3.61
Alpha-latroinsectotoxin-Lt1a_2	VG_RSEM.txt	TRINITY_DN43978_c0_g1_i10	909	669.88	28.53	0.51	1.01	7.31
Alpha-latroinsectotoxin-Lt1a_2	VG_RSEM.txt	TRINITY_DN44347_c0_g2_i8	2233	1993.88	84.78	0.51	1.01	3.32
Alpha-latroinsectotoxin-Lt1a_2	VG_RSEM.txt	TRINITY_DN39265_c2_g1_i3	986	746.88	31.3	0.5	0.99	53.36
Alpha-latroinsectotoxin-Lt1a_2	VG_RSEM.txt	TRINITY_DN34810_c0_g1_i1	967	727.88	30.69	0.5	1	60.45
Alpha-latroinsectotoxin-Lt1a_2	VG_RSEM.txt	TRINITY_DN43901_c0_g8_i9	308	73.45	3.06	0.5	0.99	5.97
Alpha-latroinsectotoxin-Lt1a_2	VG_RSEM.txt	TRINITY_DN43784_c3_g3_i2	3582	3342.88	139.72	0.5	0.99	2.86
Alpha-latroinsectotoxin-Lt1a_2	VG_RSEM.txt	TRINITY_DN41883_c4_g1_i15	2821	2581.88	106.66	0.49	0.98	6.65
Alpha-latroinsectotoxin-Lt1a_2	VG_RSEM.txt	TRINITY_DN44798_c3_g3_i8	710	470.88	18.65	0.47	0.94	1.78
Alpha-latroinsectotoxin-Lt1a_2	VG_RSEM.txt	TRINITY_DN44887_c1_g1_i12	2461	2221.88	85.08	0.46	0.91	34.38
Alpha-latroinsectotoxin-Lt1a_2	VG_RSEM.txt	TRINITY_DN43978_c0_g1_i2	7065	6825.88	253.33	0.44	0.88	6.37
Alpha-latroinsectotoxin-Lt1a_2	VG_RSEM.txt	TRINITY_DN43205_c0_g3_i24	3014	2774.88	101.7	0.44	0.87	9.77
Alpha-latroinsectotoxin-Lt1a_2	VG_RSEM.txt	TRINITY_DN44347_c0_g2_i5	2580	2340.88	83.19	0.42	0.84	2.77
Alpha-latroinsectotoxin-Lt1a_2	VG_RSEM.txt	TRINITY_DN43395_c0_g6_i7	2811	2571.88	89.5	0.41	0.83	9.28
Alpha-latroinsectotoxin-Lt1a_2	VG_RSEM.txt	TRINITY_DN32779_c0_g1_i1	1026	786.88	26	0.39	0.78	100
Alpha-latroinsectotoxin-Lt1a_2	VG_RSEM.txt	TRINITY_DN43295_c1_g10_i2	2019	1779.88	55.17	0.37	0.74	2.14
Alpha-latroinsectotoxin-Lt1a_2	VG_RSEM.txt	TRINITY_DN37803_c0_g2_i6	2259	2019.88	63.06	0.37	0.74	6.13
Alpha-latroinsectotoxin-Lt1a_2	VG_RSEM.txt	TRINITY_DN41057_c1_g1_i2	4307	4067.88	127	0.37	0.74	100
Alpha-latroinsectotoxin-Lt1a_2	VG_RSEM.txt	TRINITY_DN43533_c0_g2_i1	795	555.88	16.47	0.35	0.7	10.39
Alpha-latroinsectotoxin-Lt1a_2	VG_RSEM.txt	TRINITY_DN43189_c0_g3_i3	718	478.88	13.56	0.34	0.67	21.55
Alpha-latroinsectotoxin-Lt1a_2	VG_RSEM.txt	TRINITY_DN41883_c4_g1_i10	1233	993.88	28.7	0.34	0.69	4.65
Alpha-latroinsectotoxin-Lt1a_2	VG_RSEM.txt	TRINITY_DN44798_c3_g3_i6	4044	3804.88	107.86	0.34	0.67	1.27
Alpha-latroinsectotoxin-Lt1a_2	VG_RSEM.txt	TRINITY_DN43288_c0_g10_i5	1678	1438.88	39.49	0.33	0.65	4.61
Alpha-latroinsectotoxin-Lt1a_2	VG_RSEM.txt	TRINITY_DN44798_c3_g3_i9	3999	3759.88	105.72	0.33	0.67	1.26
Alpha-latroinsectotoxin-Lt1a_2	VG_RSEM.txt	TRINITY_DN42503_c0_g1_i10	3462	3222.88	88.78	0.33	0.65	4.32
Alpha-latroinsectotoxin-Lt1a_2	VG_RSEM.txt	TRINITY_DN43205_c0_g3_i18	3295	3055.88	83.43	0.32	0.65	7.28
Alpha-latroinsectotoxin-Lt1a_2	VG_RSEM.txt	TRINITY_DN41883_c4_g1_i7	3953	3713.88	100.1	0.32	0.64	4.34
Alpha-latroinsectotoxin-Lt1a_2	VG_RSEM.txt	TRINITY_DN44681_c2_g2_i1	974	734.88	19.32	0.31	0.62	2.45
Alpha-latroinsectotoxin-Lt1a_2	VG_RSEM.txt	TRINITY_DN39965_c0_g2_i1	1290	1050.88	27.46	0.31	0.62	33.92
Alpha-latroinsectotoxin-Lt1a_2	VG_RSEM.txt	TRINITY_DN44347_c0_g2_i6	2405	2165.88	56.94	0.31	0.62	2.05
Alpha-latroinsectotoxin-Lt1a_2	VG_RSEM.txt	TRINITY_DN42748_c0_g1_i9	3242	3002.88	78.32	0.31	0.62	8.76
Alpha-latroinsectotoxin-Lt1a_2	VG_RSEM.txt	TRINITY_DN42847_c2_g1_i5	2709	2469.88	62.09	0.3	0.6	31.66
Alpha-latroinsectotoxin-Lt1a_2	VG_RSEM.txt	TRINITY_DN39358_c1_g1_i16	999	759.88	18.52	0.29	0.58	39.15
Alpha-latroinsectotoxin-Lt1a_2	VG_RSEM.txt	TRINITY_DN39831_c0_g1_i4	4094	3854.88	95.21	0.29	0.59	14.32
Alpha-latroinsectotoxin-Lt1a_2	VG_RSEM.txt	TRINITY_DN44887_c1_g1_i10	1727	1487.88	35.87	0.29	0.57	21.65
Alpha-latroinsectotoxin-Lt1a_2	VG_RSEM.txt	TRINITY_DN43395_c0_g6_i5	2955	2715.88	64.96	0.28	0.57	6.38
Alpha-latroinsectotoxin-Lt1a_2	VG_RSEM.txt	TRINITY_DN42503_c0_g1_i8	6107	5867.88	126.95	0.26	0.51	3.39
Alpha-latroinsectotoxin-Lt1a_2	VG_RSEM.txt	TRINITY_DN43978_c0_g1_i8	7506	7266.88	151.51	0.25	0.5	3.58
Alpha-latroinsectotoxin-Lt1a_2	VG_RSEM.txt	TRINITY_DN43822_c0_g5_i2	824	584.88	12.12	0.25	0.49	14.37
Alpha-latroinsectotoxin-Lt1a_2	VG_RSEM.txt	TRINITY_DN44741_c0_g1_i8	2131	1891.88	40.16	0.25	0.5	2.44
Alpha-latroinsectotoxin-Lt1a_2	VG_RSEM.txt	TRINITY_DN70491_c0_g2_i1	852	612.88	13	0.25	0.5	100
Alpha-latroinsectotoxin-Lt1a_2	VG_RSEM.txt	TRINITY_DN43533_c0_g2_i3	1371	1131.88	21.93	0.23	0.46	6.8
Alpha-latroinsectotoxin-Lt1a_2	VG_RSEM.txt	TRINITY_DN43205_c0_g3_i3	3115	2875.88	56.38	0.23	0.47	5.23
Alpha-latroinsectotoxin-Lt1a_2	VG_RSEM.txt	TRINITY_DN44887_c1_g1_i13	2380	2140.88	41.58	0.23	0.46	17.44
Alpha-latroinsectotoxin-Lt1a_2	VG_RSEM.txt	TRINITY_DN43978_c0_g1_i1	1687	1447.88	26.43	0.22	0.43	3.13
Alpha-latroinsectotoxin-Lt1a_2	VG_RSEM.txt	TRINITY_DN43978_c0_g1_i17	7738	7498.88	140.51	0.22	0.44	3.22
Alpha-latroinsectotoxin-Lt1a_2	VG_RSEM.txt	TRINITY_DN43978_c0_g1_i19	7885	7645.88	143.94	0.22	0.45	3.23
Alpha-latroinsectotoxin-Lt1a_2	VG_RSEM.txt	TRINITY_DN43205_c0_g3_i20	3056	2816.88	52.59	0.22	0.44	4.98
Alpha-latroinsectotoxin-Lt1a_2	VG_RSEM.txt	TRINITY_DN41713_c1_g2_i2	2432	2192.88	36.93	0.2	0.4	0.98
Alpha-latroinsectotoxin-Lt1a_2	VG_RSEM.txt	TRINITY_DN37932_c0_g4_i3	2225	1985.88	32.79	0.2	0.39	2.55
Alpha-latroinsectotoxin-Lt1a_2	VG_RSEM.txt	TRINITY_DN43978_c0_g1_i13	4832	4592.88	74.56	0.19	0.39	2.79
Alpha-latroinsectotoxin-Lt1a_2	VG_RSEM.txt	TRINITY_DN43978_c0_g1_i24	7007	6767.88	104.87	0.18	0.37	2.66
Alpha-latroinsectotoxin-Lt1a_2	VG_RSEM.txt	TRINITY_DN39210_c0_g1_i1	2478	2238.88	32.89	0.17	0.35	5.06
Alpha-latroinsectotoxin-Lt1a_2	VG_RSEM.txt	TRINITY_DN39265_c2_g1_i4	1174	934.88	13.01	0.17	0.33	17.72
Alpha-latroinsectotoxin-Lt1a_2	VG_RSEM.txt	TRINITY_DN43205_c0_g3_i11	3169	2929.88	42.66	0.17	0.35	3.88
Alpha-latroinsectotoxin-Lt1a_2	VG_RSEM.txt	TRINITY_DN41883_c4_g1_i2	3950	3710.88	53.77	0.17	0.34	2.33
Alpha-latroinsectotoxin-Lt1a_2	VG_RSEM.txt	TRINITY_DN42847_c2_g1_i21	2800	2560.88	36.87	0.17	0.34	18.13
Alpha-latroinsectotoxin-Lt1a_2	VG_RSEM.txt	TRINITY_DN39358_c1_g1_i4	4616	4376.88	58.28	0.16	0.32	21.38
Alpha-latroinsectotoxin-Lt1a_2	VG_RSEM.txt	TRINITY_DN44885_c3_g1_i1	4879	4639.88	61.55	0.16	0.31	2.48
Alpha-latroinsectotoxin-Lt1a_2	VG_RSEM.txt	TRINITY_DN43822_c0_g5_i3	1732	1492.88	18.54	0.15	0.29	8.61
Alpha-latroinsectotoxin-Lt1a_2	VG_RSEM.txt	TRINITY_DN43822_c0_g5_i6	1594	1354.88	16.78	0.15	0.29	8.59
Alpha-latroinsectotoxin-Lt1a_2	VG_RSEM.txt	TRINITY_DN43327_c1_g8_i5	1319	1079.88	13.91	0.15	0.31	3.23
Alpha-latroinsectotoxin-Lt1a_2	VG_RSEM.txt	TRINITY_DN39831_c0_g1_i3	4231	3991.88	49.47	0.15	0.29	7.18
Alpha-latroinsectotoxin-Lt1a_2	VG_RSEM.txt	TRINITY_DN42748_c0_g1_i2	3318	3078.88	39.06	0.15	0.3	4.26
Alpha-latroinsectotoxin-Lt1a_2	VG_RSEM.txt	TRINITY_DN44885_c3_g1_i11	929	689.88	8.52	0.15	0.29	2.31
Alpha-latroinsectotoxin-Lt1a_2	VG_RSEM.txt	TRINITY_DN42847_c2_g1_i19	2592	2352.88	29.64	0.15	0.3	15.87
Alpha-latroinsectotoxin-Lt1a_2	VG_RSEM.txt	TRINITY_DN19924_c0_g2_i1	1170	930.88	10.7	0.14	0.27	100
Alpha-latroinsectotoxin-Lt1a_2	VG_RSEM.txt	TRINITY_DN37932_c0_g4_i2	2194	1954.88	21.37	0.13	0.26	1.69
Alpha-latroinsectotoxin-Lt1a_2	VG_RSEM.txt	TRINITY_DN43288_c0_g10_i10	1789	1549.88	15.01	0.12	0.23	1.63
Alpha-latroinsectotoxin-Lt1a_2	VG_RSEM.txt	TRINITY_DN43205_c0_g3_i15	3205	2965.88	30.41	0.12	0.24	2.73
Alpha-latroinsectotoxin-Lt1a_2	VG_RSEM.txt	TRINITY_DN37862_c0_g1_i2	4225	3985.88	40.49	0.12	0.24	40.48
Alpha-latroinsectotoxin-Lt1a_2	VG_RSEM.txt	TRINITY_DN37862_c0_g1_i4	3673	3433.88	35.38	0.12	0.24	41.06
Alpha-latroinsectotoxin-Lt1a_2	VG_RSEM.txt	TRINITY_DN42847_c2_g1_i24	775	535.88	5.61	0.12	0.25	13.18
Alpha-latroinsectotoxin-Lt1a_2	VG_RSEM.txt	TRINITY_DN43969_c0_g2_i1	360	121.78	1.16	0.11	0.23	100
Alpha-latroinsectotoxin-Lt1a_2	VG_RSEM.txt	TRINITY_DN43205_c0_g3_i17	3385	3145.88	29.49	0.11	0.22	2.5
Alpha-latroinsectotoxin-Lt1a_2	VG_RSEM.txt	TRINITY_DN19201_c0_g1_i1	550	310.9	3	0.11	0.23	100
Alpha-latroinsectotoxin-Lt1a_2	VG_RSEM.txt	TRINITY_DN43978_c0_g1_i14	7580	7340.88	64.2	0.1	0.21	1.5
Alpha-latroinsectotoxin-Lt1a_2	VG_RSEM.txt	TRINITY_DN43978_c0_g1_i23	942	702.88	5.85	0.1	0.2	1.43
Alpha-latroinsectotoxin-Lt1a_2	VG_RSEM.txt	TRINITY_DN43978_c0_g1_i5	1398	1158.88	9.58	0.1	0.2	1.42
Alpha-latroinsectotoxin-Lt1a_2	VG_RSEM.txt	TRINITY_DN39358_c1_g1_i9	2197	1957.88	15.79	0.1	0.19	12.95
Alpha-latroinsectotoxin-Lt1a_2	VG_RSEM.txt	TRINITY_DN43978_c0_g1_i12	7812	7572.88	59.74	0.09	0.19	1.35
Alpha-latroinsectotoxin-Lt1a_2	VG_RSEM.txt	TRINITY_DN43205_c0_g3_i16	2400	2160.88	15.94	0.09	0.18	1.97
Alpha-latroinsectotoxin-Lt1a_2	VG_RSEM.txt	TRINITY_DN42503_c0_g1_i3	6186	5946.88	45.97	0.09	0.18	1.21
Alpha-latroinsectotoxin-Lt1a_2	VG_RSEM.txt	TRINITY_DN37932_c0_g4_i1	2242	2002.88	14.75	0.09	0.17	1.14
Alpha-latroinsectotoxin-Lt1a_2	VG_RSEM.txt	TRINITY_DN43205_c0_g3_i4	3146	2906.88	18.74	0.08	0.15	1.72
Alpha-latroinsectotoxin-Lt1a_2	VG_RSEM.txt	TRINITY_DN39358_c1_g1_i2	4745	4505.88	30.41	0.08	0.16	10.84
Alpha-latroinsectotoxin-Lt1a_2	VG_RSEM.txt	TRINITY_DN39358_c1_g1_i6	4619	4379.88	26.82	0.07	0.15	9.83
Alpha-latroinsectotoxin-Lt1a_2	VG_RSEM.txt	TRINITY_DN44798_c3_g3_i12	4018	3778.88	22.07	0.07	0.14	0.26
Alpha-latroinsectotoxin-Lt1a_2	VG_RSEM.txt	TRINITY_DN42748_c0_g1_i4	3158	2918.88	16.25	0.07	0.13	1.87
Alpha-latroinsectotoxin-Lt1a_2	VG_RSEM.txt	TRINITY_DN43205_c0_g3_i13	3056	2816.88	14.66	0.06	0.12	1.39
Alpha-latroinsectotoxin-Lt1a_2	VG_RSEM.txt	TRINITY_DN43205_c0_g3_i5	3259	3019.88	16.24	0.06	0.13	1.43
Alpha-latroinsectotoxin-Lt1a_2	VG_RSEM.txt	TRINITY_DN42544_c1_g4_i1	2169	1929.88	10.1	0.06	0.12	1.8
Alpha-latroinsectotoxin-Lt1a_2	VG_RSEM.txt	TRINITY_DN42544_c1_g4_i5	2169	1929.88	9.69	0.06	0.12	1.73
Alpha-latroinsectotoxin-Lt1a_2	VG_RSEM.txt	TRINITY_DN42847_c2_g1_i1	2906	2666.88	13.95	0.06	0.12	6.59
Alpha-latroinsectotoxin-Lt1a_2	VG_RSEM.txt	TRINITY_DN39657_c0_g1_i3	1194	954.88	4.62	0.06	0.11	4.96
Alpha-latroinsectotoxin-Lt1a_2	VG_RSEM.txt	TRINITY_DN43901_c0_g7_i2	902	662.88	2.59	0.05	0.09	1.08
Alpha-latroinsectotoxin-Lt1a_2	VG_RSEM.txt	TRINITY_DN43205_c0_g3_i29	3169	2929.88	12.36	0.05	0.1	1.12
Alpha-latroinsectotoxin-Lt1a_2	VG_RSEM.txt	TRINITY_DN41883_c4_g1_i14	2190	1950.88	8.21	0.05	0.1	0.68
Alpha-latroinsectotoxin-Lt1a_2	VG_RSEM.txt	TRINITY_DN39657_c0_g1_i7	1643	1403.88	6.26	0.05	0.11	4.57
Alpha-latroinsectotoxin-Lt1a_2	VG_RSEM.txt	TRINITY_DN41713_c1_g2_i5	2687	2447.88	8.99	0.04	0.09	0.21
Alpha-latroinsectotoxin-Lt1a_2	VG_RSEM.txt	TRINITY_DN43978_c0_g1_i16	692	452.88	1.62	0.04	0.09	0.62
Alpha-latroinsectotoxin-Lt1a_2	VG_RSEM.txt	TRINITY_DN43978_c0_g1_i18	1940	1700.88	6.38	0.04	0.09	0.64
Alpha-latroinsectotoxin-Lt1a_2	VG_RSEM.txt	TRINITY_DN43205_c0_g3_i28	3270	3030.88	9.17	0.04	0.07	0.81
Alpha-latroinsectotoxin-Lt1a_2	VG_RSEM.txt	TRINITY_DN39358_c1_g1_i7	4748	4508.88	16.44	0.04	0.09	5.86
Alpha-latroinsectotoxin-Lt1a_2	VG_RSEM.txt	TRINITY_DN37862_c0_g1_i1	3577	3337.88	10.53	0.04	0.07	12.57
Alpha-latroinsectotoxin-Lt1a_2	VG_RSEM.txt	TRINITY_DN42847_c2_g1_i2	2683	2443.88	8.69	0.04	0.08	4.48
Alpha-latroinsectotoxin-Lt1a_2	VG_RSEM.txt	TRINITY_DN42847_c2_g1_i20	2980	2740.88	8.91	0.04	0.08	4.09
Alpha-latroinsectotoxin-Lt1a_2	VG_RSEM.txt	TRINITY_DN43205_c0_g3_i8	3157	2917.88	6.69	0.03	0.05	0.61
Alpha-latroinsectotoxin-Lt1a_2	VG_RSEM.txt	TRINITY_DN44798_c3_g3_i3	4087	3847.88	10.67	0.03	0.07	0.12
Alpha-latroinsectotoxin-Lt1a_2	VG_RSEM.txt	TRINITY_DN44798_c3_g3_i5	3998	3758.88	8.08	0.03	0.05	0.1
Alpha-latroinsectotoxin-Lt1a_2	VG_RSEM.txt	TRINITY_DN42748_c0_g1_i5	3234	2994.88	7.91	0.03	0.06	0.89
Alpha-latroinsectotoxin-Lt1a_2	VG_RSEM.txt	TRINITY_DN4496_c0_g1_i1	925	685.88	2	0.03	0.07	100
Alpha-latroinsectotoxin-Lt1a_2	VG_RSEM.txt	TRINITY_DN42847_c2_g1_i9	2997	2757.88	7.9	0.03	0.07	3.61
Alpha-latroinsectotoxin-Lt1a_2	VG_RSEM.txt	TRINITY_DN43951_c1_g3_i3	2290	2050.88	3.7	0.02	0.04	7.72
Alpha-latroinsectotoxin-Lt1a_2	VG_RSEM.txt	TRINITY_DN43288_c0_g10_i7	1518	1278.88	2.63	0.02	0.05	0.35
Alpha-latroinsectotoxin-Lt1a_2	VG_RSEM.txt	TRINITY_DN43205_c0_g3_i12	2400	2160.88	3.35	0.02	0.04	0.41
Alpha-latroinsectotoxin-Lt1a_2	VG_RSEM.txt	TRINITY_DN43205_c0_g3_i27	3211	2971.88	3.85	0.02	0.03	0.35
Alpha-latroinsectotoxin-Lt1a_2	VG_RSEM.txt	TRINITY_DN41713_c1_g2_i6	1993	1753.88	2.09	0.01	0.03	0.07
Alpha-latroinsectotoxin-Lt1a_2	VG_RSEM.txt	TRINITY_DN43978_c0_g1_i15	1431	1191.88	0.9	0.01	0.02	0.13
Alpha-latroinsectotoxin-Lt1a_2	VG_RSEM.txt	TRINITY_DN43205_c0_g3_i7	3247	3007.88	2.68	0.01	0.02	0.24
Alpha-latroinsectotoxin-Lt1a_2	VG_RSEM.txt	TRINITY_DN43822_c0_g5_i5	1656	1416.88	0.6	0.01	0.01	0.3
Alpha-latroinsectotoxin-Lt1a_2	VG_RSEM.txt	TRINITY_DN37862_c0_g1_i3	4129	3889.88	3.75	0.01	0.02	3.84
Alpha-latroinsectotoxin-Lt1a_2	VG_RSEM.txt	TRINITY_DN37862_c0_g1_i5	3829	3589.88	1.59	0.01	0.01	1.76
Alpha-latroinsectotoxin-Lt1a_2	VG_RSEM.txt	TRINITY_DN44767_c0_g1_i3	14433	14193.9	7.48	0.01	0.01	0.55
Alpha-latroinsectotoxin-Lt1a_2	VG_RSEM.txt	TRINITY_DN42847_c2_g1_i23	3086	2846.88	2.1	0.01	0.02	0.93
Alpha-latroinsectotoxin-Lt1a_2	VG_RSEM.txt	TRINITY_DN42847_c2_g1_i6	3177	2937.88	2.09	0.01	0.02	0.9
Alpha-latroinsectotoxin-Lt1a_2	VG_RSEM.txt	TRINITY_DN54731_c0_g1_i1	391	152.12	0	0	0	0
Alpha-latroinsectotoxin-Lt1a_2	VG_RSEM.txt	TRINITY_DN43978_c0_g1_i20	460	220.92	0	0	0	0
Alpha-latroinsectotoxin-Lt1a_2	VG_RSEM.txt	TRINITY_DN43978_c0_g1_i25	1298	1058.88	0	0	0	0
Alpha-latroinsectotoxin-Lt1a_2	VG_RSEM.txt	TRINITY_DN43978_c0_g1_i7	1265	1025.88	0	0	0	0
Alpha-latroinsectotoxin-Lt1a_2	VG_RSEM.txt	TRINITY_DN43901_c0_g8_i8	1054	814.88	0	0	0	0
Alpha-latroinsectotoxin-Lt1a_2	VG_RSEM.txt	TRINITY_DN43951_c1_g3_i5	1307	1067.88	0	0	0	0
Alpha-latroinsectotoxin-Lt1a_2	VG_RSEM.txt	TRINITY_DN43288_c0_g10_i3	1562	1322.88	0	0	0	0
Alpha-latroinsectotoxin-Lt1a_2	VG_RSEM.txt	TRINITY_DN43288_c0_g10_i8	4008	3768.88	0	0	0	0
Alpha-latroinsectotoxin-Lt1a_2	VG_RSEM.txt	TRINITY_DN43205_c0_g3_i1	3104	2864.88	0	0	0	0
Alpha-latroinsectotoxin-Lt1a_2	VG_RSEM.txt	TRINITY_DN43205_c0_g3_i14	3230	2990.88	0	0	0	0
Alpha-latroinsectotoxin-Lt1a_2	VG_RSEM.txt	TRINITY_DN43205_c0_g3_i19	3259	3019.88	0	0	0	0
Alpha-latroinsectotoxin-Lt1a_2	VG_RSEM.txt	TRINITY_DN43205_c0_g3_i30	3211	2971.88	1.09	0	0.01	0.1
Alpha-latroinsectotoxin-Lt1a_2	VG_RSEM.txt	TRINITY_DN43205_c0_g3_i6	3272	3032.88	0	0	0	0
Alpha-latroinsectotoxin-Lt1a_2	VG_RSEM.txt	TRINITY_DN43205_c0_g3_i9	3146	2906.88	0	0	0	0
Alpha-latroinsectotoxin-Lt1a_2	VG_RSEM.txt	TRINITY_DN43205_c0_g3_i21	3182	2942.88	0	0	0	0
Alpha-latroinsectotoxin-Lt1a_2	VG_RSEM.txt	TRINITY_DN43205_c0_g3_i23	3140	2900.88	0	0	0	0
Alpha-latroinsectotoxin-Lt1a_2	VG_RSEM.txt	TRINITY_DN43295_c1_g10_i3	2020	1780.88	0	0	0	0
Alpha-latroinsectotoxin-Lt1a_2	VG_RSEM.txt	TRINITY_DN44140_c1_g1_i2	521	281.91	0	0	0	0
Alpha-latroinsectotoxin-Lt1a_2	VG_RSEM.txt	TRINITY_DN39358_c1_g1_i1	4379	4139.88	0	0	0	0
Alpha-latroinsectotoxin-Lt1a_2	VG_RSEM.txt	TRINITY_DN39358_c1_g1_i10	4387	4147.88	0	0	0	0
Alpha-latroinsectotoxin-Lt1a_2	VG_RSEM.txt	TRINITY_DN39358_c1_g1_i11	4554	4314.88	0	0	0	0
Alpha-latroinsectotoxin-Lt1a_2	VG_RSEM.txt	TRINITY_DN39358_c1_g1_i12	2068	1828.88	0	0	0	0
Alpha-latroinsectotoxin-Lt1a_2	VG_RSEM.txt	TRINITY_DN39358_c1_g1_i13	4551	4311.88	0	0	0	0
Alpha-latroinsectotoxin-Lt1a_2	VG_RSEM.txt	TRINITY_DN39358_c1_g1_i14	934	694.88	0	0	0	0
Alpha-latroinsectotoxin-Lt1a_2	VG_RSEM.txt	TRINITY_DN39358_c1_g1_i15	4683	4443.88	0	0	0	0
Alpha-latroinsectotoxin-Lt1a_2	VG_RSEM.txt	TRINITY_DN39358_c1_g1_i3	4370	4130.88	0	0	0	0
Alpha-latroinsectotoxin-Lt1a_2	VG_RSEM.txt	TRINITY_DN39358_c1_g1_i5	4508	4268.88	0	0	0	0
Alpha-latroinsectotoxin-Lt1a_2	VG_RSEM.txt	TRINITY_DN39358_c1_g1_i8	4680	4440.88	0	0	0	0
Alpha-latroinsectotoxin-Lt1a_2	VG_RSEM.txt	TRINITY_DN37803_c0_g2_i2	2258	2018.88	0	0	0	0
Alpha-latroinsectotoxin-Lt1a_2	VG_RSEM.txt	TRINITY_DN37803_c0_g2_i3	2263	2023.88	0	0	0	0
Alpha-latroinsectotoxin-Lt1a_2	VG_RSEM.txt	TRINITY_DN37803_c0_g2_i5	2187	1947.88	0	0	0	0
Alpha-latroinsectotoxin-Lt1a_2	VG_RSEM.txt	TRINITY_DN37862_c0_g1_i6	3733	3493.88	0.26	0	0	0.3
Alpha-latroinsectotoxin-Lt1a_2	VG_RSEM.txt	TRINITY_DN37862_c0_g1_i7	3973	3733.88	0	0	0	0
Alpha-latroinsectotoxin-Lt1a_2	VG_RSEM.txt	TRINITY_DN37862_c0_g1_i8	4069	3829.88	0	0	0	0
Alpha-latroinsectotoxin-Lt1a_2	VG_RSEM.txt	TRINITY_DN44347_c0_g2_i4	2251	2011.88	0	0	0	0
Alpha-latroinsectotoxin-Lt1a_2	VG_RSEM.txt	TRINITY_DN44347_c0_g2_i14	2826	2586.88	0	0	0	0
Alpha-latroinsectotoxin-Lt1a_2	VG_RSEM.txt	TRINITY_DN44347_c0_g2_i16	1475	1235.88	0	0	0	0
Alpha-latroinsectotoxin-Lt1a_2	VG_RSEM.txt	TRINITY_DN41883_c4_g1_i11	1064	824.88	0	0	0	0
Alpha-latroinsectotoxin-Lt1a_2	VG_RSEM.txt	TRINITY_DN41883_c4_g1_i13	4105	3865.88	0	0	0	0
Alpha-latroinsectotoxin-Lt1a_2	VG_RSEM.txt	TRINITY_DN41883_c4_g1_i4	4203	3963.88	0	0	0	0
Alpha-latroinsectotoxin-Lt1a_2	VG_RSEM.txt	TRINITY_DN44798_c3_g3_i7	4086	3846.88	0.96	0	0.01	0.01
Alpha-latroinsectotoxin-Lt1a_2	VG_RSEM.txt	TRINITY_DN44798_c3_g3_i14	4075	3835.88	0.14	0	0	0
Alpha-latroinsectotoxin-Lt1a_2	VG_RSEM.txt	TRINITY_DN44741_c0_g1_i3	1639	1399.88	0	0	0	0
Alpha-latroinsectotoxin-Lt1a_2	VG_RSEM.txt	TRINITY_DN44767_c0_g1_i2	14365	14125.9	2.03	0	0	0.15
Alpha-latroinsectotoxin-Lt1a_2	VG_RSEM.txt	TRINITY_DN44767_c0_g1_i7	14616	14376.9	0	0	0	0
Alpha-latroinsectotoxin-Lt1a_2	VG_RSEM.txt	TRINITY_DN44767_c0_g1_i9	14548	14308.9	0	0	0	0
Alpha-latroinsectotoxin-Lt1a_2	VG_RSEM.txt	TRINITY_DN42748_c0_g1_i3	3198	2958.88	0	0	0	0
Alpha-latroinsectotoxin-Lt1a_2	VG_RSEM.txt	TRINITY_DN42748_c0_g1_i6	3081	2841.88	0	0	0	0
Alpha-latroinsectotoxin-Lt1a_2	VG_RSEM.txt	TRINITY_DN42748_c0_g1_i10	3275	3035.88	0	0	0	0
Alpha-latroinsectotoxin-Lt1a_2	VG_RSEM.txt	TRINITY_DN42748_c0_g1_i11	3157	2917.88	0	0	0	0
Alpha-latroinsectotoxin-Lt1a_2	VG_RSEM.txt	TRINITY_DN42748_c0_g1_i12	3114	2874.88	0	0	0	0
Alpha-latroinsectotoxin-Lt1a_2	VG_RSEM.txt	TRINITY_DN4496_c0_g2_i1	366	127.59	0	0	0	0
Alpha-latroinsectotoxin-Lt1a_2	VG_RSEM.txt	TRINITY_DN44887_c1_g1_i3	2469	2229.88	0	0	0	0
Alpha-latroinsectotoxin-Lt1a_2	VG_RSEM.txt	TRINITY_DN44887_c1_g1_i4	2550	2310.88	0	0	0	0
Alpha-latroinsectotoxin-Lt1a_2	VG_RSEM.txt	TRINITY_DN44887_c1_g1_i6	1808	1568.88	0	0	0	0
Alpha-latroinsectotoxin-Lt1a_2	VG_RSEM.txt	TRINITY_DN44887_c1_g1_i9	1897	1657.88	0	0	0	0
Alpha-latroinsectotoxin-Lt1a_2	VG_RSEM.txt	TRINITY_DN44887_c1_g1_i16	1816	1576.88	0	0	0	0
Alpha-latroinsectotoxin-Lt1a_2	VG_RSEM.txt	TRINITY_DN44885_c3_g1_i13	945	705.88	0	0	0	0
Alpha-latroinsectotoxin-Lt1a_2	VG_RSEM.txt	TRINITY_DN44885_c3_g1_i5	5008	4768.88	0	0	0	0
Alpha-latroinsectotoxin-Lt1a_2	VG_RSEM.txt	TRINITY_DN44885_c3_g1_i9	4989	4749.88	0	0	0	0
Alpha-latroinsectotoxin-Lt1a_2	VG_RSEM.txt	TRINITY_DN42503_c0_g1_i4	3462	3222.88	0	0	0	0
Alpha-latroinsectotoxin-Lt1a_2	VG_RSEM.txt	TRINITY_DN70452_c0_g1_i1	428	188.94	0	0	0	0
Alpha-latroinsectotoxin-Lt1a_2	VG_RSEM.txt	TRINITY_DN70491_c0_g1_i1	852	612.88	0	0	0	0
Alpha-latroinsectotoxin-Lt1a_2	VG_RSEM.txt	TRINITY_DN29161_c0_g1_i1	721	481.88	0	0	0	0
Alpha-latroinsectotoxin-Lt1a_2	VG_RSEM.txt	TRINITY_DN41057_c1_g1_i1	4387	4147.88	0	0	0	0
Alpha-latroinsectotoxin-Lt1a_2	VG_RSEM.txt	TRINITY_DN42847_c2_g1_i10	2668	2428.88	0.01	0	0	0.01
Alpha-latroinsectotoxin-Lt1a_2	VG_RSEM.txt	TRINITY_DN42847_c2_g1_i11	3010	2770.88	0	0	0	0
Alpha-latroinsectotoxin-Lt1a_2	VG_RSEM.txt	TRINITY_DN42847_c2_g1_i12	2904	2664.88	0	0	0	0
Alpha-latroinsectotoxin-Lt1a_2	VG_RSEM.txt	TRINITY_DN42847_c2_g1_i13	866	626.88	0	0	0	0
Alpha-latroinsectotoxin-Lt1a_2	VG_RSEM.txt	TRINITY_DN42847_c2_g1_i14	2982	2742.88	0.03	0	0	0.01
Alpha-latroinsectotoxin-Lt1a_2	VG_RSEM.txt	TRINITY_DN42847_c2_g1_i15	2876	2636.88	0.09	0	0	0.04
Alpha-latroinsectotoxin-Lt1a_2	VG_RSEM.txt	TRINITY_DN42847_c2_g1_i16	3101	2861.88	0	0	0	0
Alpha-latroinsectotoxin-Lt1a_2	VG_RSEM.txt	TRINITY_DN42847_c2_g1_i17	2863	2623.88	0.39	0	0	0.19
Alpha-latroinsectotoxin-Lt1a_2	VG_RSEM.txt	TRINITY_DN42847_c2_g1_i18	2785	2545.88	0.09	0	0	0.05
Alpha-latroinsectotoxin-Lt1a_2	VG_RSEM.txt	TRINITY_DN42847_c2_g1_i22	2772	2532.88	0.52	0	0	0.26
Alpha-latroinsectotoxin-Lt1a_2	VG_RSEM.txt	TRINITY_DN42847_c2_g1_i25	2759	2519.88	0.01	0	0	0
Alpha-latroinsectotoxin-Lt1a_2	VG_RSEM.txt	TRINITY_DN42847_c2_g1_i26	3073	2833.88	0.02	0	0	0.01
Alpha-latroinsectotoxin-Lt1a_2	VG_RSEM.txt	TRINITY_DN42847_c2_g1_i27	669	429.89	0	0	0	0
Alpha-latroinsectotoxin-Lt1a_2	VG_RSEM.txt	TRINITY_DN42847_c2_g1_i28	587	347.9	0	0	0	0
Alpha-latroinsectotoxin-Lt1a_2	VG_RSEM.txt	TRINITY_DN42847_c2_g1_i3	2696	2456.88	0	0	0	0
Alpha-latroinsectotoxin-Lt1a_2	VG_RSEM.txt	TRINITY_DN42847_c2_g1_i4	2787	2547.88	0	0	0	0
Astacin-like_metalloprotease_toxin_1_1	VG_RSEM.txt	TRINITY_DN35983_c0_g5_i1	1573	1333.88	71.52	0.64	1.27	100
Astacin-like_metalloprotease_toxin_1_1	VG_RSEM.txt	TRINITY_DN84264_c0_g1_i1	429	189.94	0	0	0	0
Astacin-like_metalloprotease_toxin_1_1	VG_RSEM.txt	TRINITY_DN21625_c0_g1_i1	396	157.07	0	0	0	0
Astacin-like_metalloprotease_toxin_1_1	VG_RSEM.txt	TRINITY_DN35983_c0_g3_i1	664	424.89	0	0	0	0
Conophysin-R_1	VG_RSEM.txt	TRINITY_DN42561_c1_g1_i9	1916	1676.88	11.38	0.08	0.16	4.44
Conophysin-R_1	VG_RSEM.txt	TRINITY_DN42561_c1_g1_i6	2570	2330.88	9.25	0.05	0.09	2.6
Conophysin-R_1	VG_RSEM.txt	TRINITY_DN42561_c1_g1_i5	2544	2304.88	0	0	0	0
Conophysin-R_1	VG_RSEM.txt	TRINITY_DN42561_c1_g1_i7	1930	1690.88	0	0	0	0
Cysteine-rich_venom_protein_bucarin_1	VG_RSEM.txt	TRINITY_DN42308_c1_g1_i1	4567	4327.88	25.06	0.07	0.14	7.52
Cysteine-rich_venom_protein_bucarin_1	VG_RSEM.txt	TRINITY_DN42308_c1_g1_i5	4223	3983.88	16.66	0.05	0.1	5.43
Cysteine-rich_venom_protein_bucarin_1	VG_RSEM.txt	TRINITY_DN42308_c1_g1_i4	4246	4006.88	0	0	0	0
Cysteine-rich_venom_protein_Mr30_2	VG_RSEM.txt	TRINITY_DN44812_c2_g5_i7	1035	795.88	31165.7	465.51	929.68	54.52
Cysteine-rich_venom_protein_Mr30_2	VG_RSEM.txt	TRINITY_DN44812_c2_g5_i4	409	169.99	4646	324.91	648.89	38.05
Cysteine-rich_venom_protein_Mr30_2	VG_RSEM.txt	TRINITY_DN43966_c3_g4_i5	1121	881.88	143.39	1.93	3.86	49.8
Cysteine-rich_venom_protein_Mr30_2	VG_RSEM.txt	TRINITY_DN43966_c3_g4_i8	1385	1145.88	80.71	0.84	1.67	21.58
Cysteine-rich_venom_protein_Mr30_2	VG_RSEM.txt	TRINITY_DN43966_c3_g4_i1	1451	1211.88	7.38	0.07	0.14	1.87
Cysteine-rich_venom_protein_Mr30_2	VG_RSEM.txt	TRINITY_DN43966_c3_g4_i2	1765	1525.88	2.52	0.02	0.04	0.51
Delta-latroinsectotoxin-Lt1a_1	VG_RSEM.txt	TRINITY_DN44050_c0_g1_i1	1288	1048.88	345	3.91	7.81	100
Delta-latroinsectotoxin-Lt1a_1	VG_RSEM.txt	TRINITY_DN35012_c0_g1_i1	4997	4757.88	1040	2.6	5.19	100
Delta-latroinsectotoxin-Lt1a_1	VG_RSEM.txt	TRINITY_DN43822_c0_g4_i1	388	149.16	21	1.67	3.34	100
Delta-latroinsectotoxin-Lt1a_1	VG_RSEM.txt	TRINITY_DN42503_c0_g1_i1	2307	2067.88	184.35	1.06	2.12	13.97
Delta-latroinsectotoxin-Lt1a_1	VG_RSEM.txt	TRINITY_DN42503_c0_g1_i11	2425	2185.88	162.33	0.88	1.76	11.64
Delta-latroinsectotoxin-Lt1a_1	VG_RSEM.txt	TRINITY_DN42748_c0_g1_i7	3190	2950.88	64.91	0.26	0.52	7.38
Delta-latroinsectotoxin-Lt1a_1	VG_RSEM.txt	TRINITY_DN43951_c1_g3_i2	2222	1982.88	4.08	0.02	0.05	8.81
Delta-latroinsectotoxin-Lt1a_1	VG_RSEM.txt	TRINITY_DN42748_c0_g1_i8	3351	3111.88	2.86	0.01	0.02	0.31
Delta-latroinsectotoxin-Lt1a_1	VG_RSEM.txt	TRINITY_DN43951_c1_g3_i4	1199	959.88	0	0	0	0
Disintegrin_acostatin-alpha_26	VG_RSEM.txt	TRINITY_DN43191_c3_g2_i5	8054	7814.88	44.18	0.07	0.13	20.38
Disintegrin_acostatin-alpha_26	VG_RSEM.txt	TRINITY_DN43191_c3_g2_i3	8062	7822.88	0.07	0	0	0.03
Disintegrin_bitistatin_6	VG_RSEM.txt	TRINITY_DN43602_c0_g3_i3	1512	1272.88	1434.72	13.4	26.76	85.86
Disintegrin_bitistatin_6	VG_RSEM.txt	TRINITY_DN43602_c0_g6_i3	873	633.88	44.79	0.84	1.68	33.42
Disintegrin_bitistatin_6	VG_RSEM.txt	TRINITY_DN43602_c0_g3_i4	1094	854.88	56.6	0.79	1.57	5.04
Disintegrin_bitistatin_6	VG_RSEM.txt	TRINITY_DN43602_c0_g6_i9	485	245.92	9.43	0.46	0.91	18.14
Disintegrin_bitistatin_6	VG_RSEM.txt	TRINITY_DN43602_c0_g6_i8	769	529.88	16.31	0.37	0.73	14.56
Disintegrin_bitistatin_6	VG_RSEM.txt	TRINITY_DN43602_c0_g6_i2	689	449.88	1.22	0.03	0.06	1.29
Disintegrin_bitistatin_6	VG_RSEM.txt	TRINITY_DN43602_c0_g6_i4	953	713.88	0	0	0	0
Factor_V_activator_RVV-V_gamma_142	VG_RSEM.txt	TRINITY_DN44839_c3_g4_i2	2656	2416.88	5296.93	26.05	52.03	86.7
Factor_V_activator_RVV-V_gamma_142	VG_RSEM.txt	TRINITY_DN37278_c0_g1_i1	854	614.88	533.38	10.31	20.59	81.46
Factor_V_activator_RVV-V_gamma_142	VG_RSEM.txt	TRINITY_DN43238_c0_g1_i1	683	443.89	116.88	3.13	6.25	100
Factor_V_activator_RVV-V_gamma_142	VG_RSEM.txt	TRINITY_DN37278_c0_g1_i2	855	615.88	121.62	2.35	4.69	18.54
Factor_V_activator_RVV-V_gamma_142	VG_RSEM.txt	TRINITY_DN36022_c0_g2_i1	1127	887.88	157	2.1	4.2	100
Factor_V_activator_RVV-V_gamma_142	VG_RSEM.txt	TRINITY_DN30563_c0_g1_i4	1980	1740.88	248.82	1.7	3.39	87.74
Factor_V_activator_RVV-V_gamma_142	VG_RSEM.txt	TRINITY_DN38594_c0_g1_i3	2154	1914.88	212	1.32	2.63	100
Factor_V_activator_RVV-V_gamma_142	VG_RSEM.txt	TRINITY_DN40401_c0_g1_i10	3494	3254.88	356.27	1.3	2.6	36.48
Factor_V_activator_RVV-V_gamma_142	VG_RSEM.txt	TRINITY_DN43295_c1_g11_i5	1744	1504.88	141.25	1.12	2.23	48.95
Factor_V_activator_RVV-V_gamma_142	VG_RSEM.txt	TRINITY_DN43918_c5_g1_i8	1945	1705.88	139.06	0.97	1.94	18.31
Factor_V_activator_RVV-V_gamma_142	VG_RSEM.txt	TRINITY_DN43689_c4_g20_i1	974	734.88	57	0.92	1.84	100
Factor_V_activator_RVV-V_gamma_142	VG_RSEM.txt	TRINITY_DN44847_c4_g1_i3	6088	5848.88	403.38	0.82	1.64	10.55
Factor_V_activator_RVV-V_gamma_142	VG_RSEM.txt	TRINITY_DN94275_c0_g1_i1	542	302.9	20	0.78	1.57	100
Factor_V_activator_RVV-V_gamma_142	VG_RSEM.txt	TRINITY_DN46785_c0_g1_i1	910	670.88	43	0.76	1.52	100
Factor_V_activator_RVV-V_gamma_142	VG_RSEM.txt	TRINITY_DN43295_c1_g11_i9	1752	1512.88	83.04	0.65	1.3	28.62
Factor_V_activator_RVV-V_gamma_142	VG_RSEM.txt	TRINITY_DN43918_c5_g2_i1	624	384.89	19	0.59	1.17	55.61
Factor_V_activator_RVV-V_gamma_142	VG_RSEM.txt	TRINITY_DN30551_c0_g1_i3	1545	1305.88	63.16	0.57	1.15	72.44
Factor_V_activator_RVV-V_gamma_142	VG_RSEM.txt	TRINITY_DN43918_c5_g1_i10	1945	1705.88	65.72	0.46	0.91	8.65
Factor_V_activator_RVV-V_gamma_142	VG_RSEM.txt	TRINITY_DN43295_c1_g11_i10	1330	1090.88	40.91	0.45	0.89	19.56
Factor_V_activator_RVV-V_gamma_142	VG_RSEM.txt	TRINITY_DN29062_c0_g1_i1	1224	984.88	31.06	0.37	0.75	100
Factor_V_activator_RVV-V_gamma_142	VG_RSEM.txt	TRINITY_DN36424_c0_g1_i1	974	734.88	23	0.37	0.74	100
Factor_V_activator_RVV-V_gamma_142	VG_RSEM.txt	TRINITY_DN70493_c0_g1_i1	908	668.88	20	0.36	0.71	100
Factor_V_activator_RVV-V_gamma_142	VG_RSEM.txt	TRINITY_DN26795_c0_g1_i2	867	627.88	15	0.28	0.57	100
Factor_V_activator_RVV-V_gamma_142	VG_RSEM.txt	TRINITY_DN19058_c0_g2_i1	774	534.88	10	0.22	0.44	100
Factor_V_activator_RVV-V_gamma_142	VG_RSEM.txt	TRINITY_DN40401_c0_g1_i4	3581	3341.88	58.88	0.21	0.42	5.87
Factor_V_activator_RVV-V_gamma_142	VG_RSEM.txt	TRINITY_DN44847_c4_g1_i5	6088	5848.88	89.94	0.18	0.37	2.35
Factor_V_activator_RVV-V_gamma_142	VG_RSEM.txt	TRINITY_DN39691_c0_g1_i1	1191	951.88	8.26	0.1	0.21	29.16
Factor_V_activator_RVV-V_gamma_142	VG_RSEM.txt	TRINITY_DN44773_c6_g5_i5	796	556.88	3.79	0.08	0.16	0.19
Factor_V_activator_RVV-V_gamma_142	VG_RSEM.txt	TRINITY_DN29651_c0_g1_i3	1518	1278.88	7.57	0.07	0.14	71.45
Factor_V_activator_RVV-V_gamma_142	VG_RSEM.txt	TRINITY_DN43918_c5_g1_i9	1927	1687.88	4.9	0.03	0.07	0.65
Factor_V_activator_RVV-V_gamma_142	VG_RSEM.txt	TRINITY_DN29651_c0_g1_i2	1264	1024.88	2.43	0.03	0.06	28.55
Factor_V_activator_RVV-V_gamma_142	VG_RSEM.txt	TRINITY_DN43918_c5_g1_i11	1927	1687.88	2.28	0.02	0.03	0.3
Factor_V_activator_RVV-V_gamma_142	VG_RSEM.txt	TRINITY_DN43295_c1_g11_i6	1773	1533.88	2.21	0.02	0.03	0.75
Factor_V_activator_RVV-V_gamma_142	VG_RSEM.txt	TRINITY_DN43295_c1_g11_i7	1765	1525.88	2.54	0.02	0.04	0.87
Factor_V_activator_RVV-V_gamma_142	VG_RSEM.txt	TRINITY_DN39691_c0_g1_i3	1034	794.88	1.07	0.02	0.03	4.52
Factor_V_activator_RVV-V_gamma_142	VG_RSEM.txt	TRINITY_DN39691_c0_g1_i5	1034	794.88	1.07	0.02	0.03	4.52
Factor_V_activator_RVV-V_gamma_142	VG_RSEM.txt	TRINITY_DN30551_c0_g1_i5	1527	1287.88	1.16	0.01	0.02	1.35
Factor_V_activator_RVV-V_gamma_142	VG_RSEM.txt	TRINITY_DN19058_c0_g1_i1	768	528.88	0	0	0	0
Factor_V_activator_RVV-V_gamma_142	VG_RSEM.txt	TRINITY_DN30551_c0_g1_i4	1168	928.88	0	0	0	0
Factor_V_activator_RVV-V_gamma_142	VG_RSEM.txt	TRINITY_DN43918_c5_g1_i12	1527	1287.88	0	0	0	0
Factor_V_activator_RVV-V_gamma_142	VG_RSEM.txt	TRINITY_DN43295_c1_g11_i8	1309	1069.88	0	0	0	0
Factor_V_activator_RVV-V_gamma_142	VG_RSEM.txt	TRINITY_DN38538_c0_g1_i1	1115	875.88	0	0	0	0
Factor_V_activator_RVV-V_gamma_142	VG_RSEM.txt	TRINITY_DN29651_c0_g1_i1	503	263.91	0	0	0	0
Factor_V_activator_RVV-V_gamma_142	VG_RSEM.txt	TRINITY_DN41899_c0_g1_i1	499	259.91	0	0	0	0
Factor_V_activator_RVV-V_gamma_142	VG_RSEM.txt	TRINITY_DN44847_c4_g1_i2	6152	5912.88	0	0	0	0
Galactose-specific_lectin_nattectin_1	VG_RSEM.txt	TRINITY_DN39536_c0_g2_i4	2041	1801.88	90.42	0.6	1.19	75.73
Hyaluronidase_1	VG_RSEM.txt	TRINITY_DN43442_c0_g2_i7	940	700.88	319.43	5.42	10.82	66.88
Hyaluronidase_1	VG_RSEM.txt	TRINITY_DN43442_c0_g3_i1	929	689.88	291.98	5.03	10.05	70.35
Hyaluronidase_1	VG_RSEM.txt	TRINITY_DN43442_c0_g3_i3	522	282.91	20.76	0.87	1.74	12.2
Hyaluronidase_1	VG_RSEM.txt	TRINITY_DN43442_c0_g2_i5	1028	788.88	52.59	0.79	1.58	9.78
Hyaluronidase_1	VG_RSEM.txt	TRINITY_DN43442_c0_g3_i4	954	714.88	42.25	0.7	1.4	9.82
Hyaluronidase_1	VG_RSEM.txt	TRINITY_DN43442_c0_g2_i3	2427	2187.88	94.56	0.51	1.03	6.34
Hyaluronidase_1	VG_RSEM.txt	TRINITY_DN43442_c0_g2_i1	2579	2339.88	0	0	0	0
Hyaluronidase_1	VG_RSEM.txt	TRINITY_DN43442_c0_g2_i6	2515	2275.88	0.7	0	0.01	0.05
KappaPI-theraphotoxin-Hs1a_80	VG_RSEM.txt	TRINITY_DN43186_c0_g1_i2	2124	1884.88	180.13	1.14	2.27	83.59
KappaPI-theraphotoxin-Hs1a_80	VG_RSEM.txt	TRINITY_DN42335_c0_g4_i1	1021	781.88	29.77	0.45	0.9	100
KappaPI-theraphotoxin-Hs1a_80	VG_RSEM.txt	TRINITY_DN43186_c0_g1_i3	2205	1965.88	36.87	0.22	0.45	16.41
KappaPI-theraphotoxin-Hs1a_80	VG_RSEM.txt	TRINITY_DN42804_c1_g8_i1	863	623.88	9.73	0.19	0.37	17.59
KappaPI-theraphotoxin-Hs1a_80	VG_RSEM.txt	TRINITY_DN42335_c0_g5_i1	563	323.9	4.66	0.17	0.34	55.23
KappaPI-theraphotoxin-Hs1a_80	VG_RSEM.txt	TRINITY_DN42335_c0_g5_i2	525	285.91	3.34	0.14	0.28	44.77
KappaPI-theraphotoxin-Hs1a_80	VG_RSEM.txt	TRINITY_DN43186_c0_g1_i1	2204	1964.88	0	0	0	0
KappaPI-theraphotoxin-Hs1a_80	VG_RSEM.txt	TRINITY_DN43186_c0_g1_i4	2123	1883.88	0	0	0	0
Kunitz-type_serine_protease_inhibitor_2_4	VG_RSEM.txt	TRINITY_DN42335_c0_g6_i1	2110	1870.88	53	0.34	0.67	100
Kunitz-type_serine_protease_inhibitor_As-fr-19_1	VG_RSEM.txt	TRINITY_DN42804_c1_g8_i2	393	154.1	11.27	0.87	1.74	82.41
Kunitz-type_serine_protease_inhibitor_bitisilin-3_1	VG_RSEM.txt	TRINITY_DN43785_c1_g4_i9	1016	776.88	13.35	0.2	0.41	12.3
Kunitz-type_serine_protease_inhibitor_bitisilin-3_1	VG_RSEM.txt	TRINITY_DN43785_c1_g4_i2	1139	899.88	0	0	0	0
Kunitz-type_serine_protease_inhibitor_bitisilin-3_1	VG_RSEM.txt	TRINITY_DN43785_c1_g4_i7	1787	1547.88	0	0	0	0
Kunitz-type_serine_protease_inhibitor_BmKTT-2_1	VG_RSEM.txt	TRINITY_DN43785_c1_g4_i6	5832	5592.88	560.86	1.19	2.38	71.78
Kunitz-type_serine_protease_inhibitor_BmKTT-2_1	VG_RSEM.txt	TRINITY_DN43785_c1_g4_i3	6066	5826.88	96.47	0.2	0.39	11.85
Kunitz-type_serine_protease_inhibitor_BmKTT-2_1	VG_RSEM.txt	TRINITY_DN43785_c1_g4_i4	5233	4993.88	25.68	0.06	0.12	3.68
Kunitz-type_serine_protease_inhibitor_BmKTT-2_1	VG_RSEM.txt	TRINITY_DN43785_c1_g4_i5	3271	3031.88	1.64	0.01	0.01	0.39
Kunitz-type_serine_protease_inhibitor_BmKTT-2_1	VG_RSEM.txt	TRINITY_DN43785_c1_g4_i1	1664	1424.88	0	0	0	0
Kunitz-type_serine_protease_inhibitor_BmKTT-2_1	VG_RSEM.txt	TRINITY_DN43785_c1_g4_i8	2009	1769.88	0	0	0	0
Neprilysin-1_1	VG_RSEM.txt	TRINITY_DN43042_c0_g1_i19	2795	2555.88	1225.14	5.7	11.38	46.62
Neprilysin-1_1	VG_RSEM.txt	TRINITY_DN29305_c0_g1_i3	668	428.89	140.67	3.9	7.79	92.48
Neprilysin-1_1	VG_RSEM.txt	TRINITY_DN43042_c0_g1_i17	3097	2857.88	817.82	3.4	6.79	27.83
Neprilysin-1_1	VG_RSEM.txt	TRINITY_DN43961_c0_g1_i6	2165	1925.88	258.62	1.6	3.19	82.76
Neprilysin-1_1	VG_RSEM.txt	TRINITY_DN41166_c0_g1_i5	2131	1891.88	240.91	1.51	3.02	69.73
Neprilysin-1_1	VG_RSEM.txt	TRINITY_DN41991_c2_g1_i1	3947	3707.88	279	0.89	1.79	100
Neprilysin-1_1	VG_RSEM.txt	TRINITY_DN41166_c0_g1_i4	4582	4342.88	205.26	0.56	1.12	25.88
Neprilysin-1_1	VG_RSEM.txt	TRINITY_DN43961_c0_g1_i3	1529	1289.88	36.08	0.33	0.66	17.24
Neprilysin-1_1	VG_RSEM.txt	TRINITY_DN40706_c1_g1_i24	1938	1698.88	43.78	0.31	0.61	40.52
Neprilysin-1_1	VG_RSEM.txt	TRINITY_DN27449_c0_g1_i1	964	724.88	17	0.28	0.56	100
Neprilysin-1_1	VG_RSEM.txt	TRINITY_DN40418_c0_g1_i1	5262	5022.88	106	0.25	0.5	100
Neprilysin-1_1	VG_RSEM.txt	TRINITY_DN43042_c0_g1_i16	3201	2961.88	50.58	0.2	0.41	1.66
Neprilysin-1_1	VG_RSEM.txt	TRINITY_DN29305_c0_g1_i2	661	421.89	5.85	0.16	0.33	3.91
Neprilysin-1_1	VG_RSEM.txt	TRINITY_DN40706_c1_g1_i19	1868	1628.88	20.56	0.15	0.3	19.85
Neprilysin-1_1	VG_RSEM.txt	TRINITY_DN29305_c0_g1_i1	668	428.89	5.49	0.15	0.3	3.61
Neprilysin-1_1	VG_RSEM.txt	TRINITY_DN41984_c4_g7_i5	2765	2525.88	27.24	0.13	0.26	17.77
Neprilysin-1_1	VG_RSEM.txt	TRINITY_DN41166_c0_g1_i2	1841	1601.88	12.83	0.1	0.19	4.39
Neprilysin-1_1	VG_RSEM.txt	TRINITY_DN40706_c1_g1_i8	2651	2411.88	18.14	0.09	0.18	11.82
Neprilysin-1_1	VG_RSEM.txt	TRINITY_DN43042_c0_g1_i2	3484	3244.88	23.38	0.09	0.17	0.7
Neprilysin-1_1	VG_RSEM.txt	TRINITY_DN40706_c1_g1_i23	2334	2094.88	14.23	0.08	0.16	10.68
Neprilysin-1_1	VG_RSEM.txt	TRINITY_DN40706_c1_g1_i22	2207	1967.88	11.64	0.07	0.14	9.3
Neprilysin-1_1	VG_RSEM.txt	TRINITY_DN41984_c4_g7_i4	1916	1676.88	10.28	0.07	0.15	10.11
Neprilysin-1_1	VG_RSEM.txt	TRINITY_DN40706_c1_g1_i4	1979	1739.88	8.66	0.06	0.12	7.83
Neprilysin-1_1	VG_RSEM.txt	TRINITY_DN41984_c4_g7_i9	1686	1446.88	7.57	0.06	0.12	8.63
Neprilysin-1_1	VG_RSEM.txt	TRINITY_DN43042_c0_g1_i20	3428	3188.88	12.98	0.05	0.1	0.4
Neprilysin-1_1	VG_RSEM.txt	TRINITY_DN41984_c4_g7_i8	1089	849.88	2.65	0.04	0.07	5.14
Neprilysin-1_1	VG_RSEM.txt	TRINITY_DN43042_c0_g1_i3	3380	3140.88	5.84	0.02	0.04	0.18
Neprilysin-1_1	VG_RSEM.txt	TRINITY_DN40706_c1_g1_i1	659	419.89	0	0	0	0
Neprilysin-1_1	VG_RSEM.txt	TRINITY_DN40706_c1_g1_i10	2174	1934.88	0	0	0	0
Neprilysin-1_1	VG_RSEM.txt	TRINITY_DN40706_c1_g1_i11	2687	2447.88	0	0	0	0
Neprilysin-1_1	VG_RSEM.txt	TRINITY_DN40706_c1_g1_i12	1584	1344.88	0	0	0	0
Neprilysin-1_1	VG_RSEM.txt	TRINITY_DN40706_c1_g1_i13	2778	2538.88	0	0	0	0
Neprilysin-1_1	VG_RSEM.txt	TRINITY_DN40706_c1_g1_i14	2700	2460.88	0	0	0	0
Neprilysin-1_1	VG_RSEM.txt	TRINITY_DN40706_c1_g1_i15	1852	1612.88	0	0	0	0
Neprilysin-1_1	VG_RSEM.txt	TRINITY_DN40706_c1_g1_i16	2133	1893.88	0	0	0	0
Neprilysin-1_1	VG_RSEM.txt	TRINITY_DN40706_c1_g1_i17	2618	2378.88	0	0	0	0
Neprilysin-1_1	VG_RSEM.txt	TRINITY_DN40706_c1_g1_i18	1831	1591.88	0	0	0	0
Neprilysin-1_1	VG_RSEM.txt	TRINITY_DN40706_c1_g1_i2	1811	1571.88	0	0	0	0
Neprilysin-1_1	VG_RSEM.txt	TRINITY_DN40706_c1_g1_i20	438	198.93	0	0	0	0
Neprilysin-1_1	VG_RSEM.txt	TRINITY_DN40706_c1_g1_i21	2577	2337.88	0	0	0	0
Neprilysin-1_1	VG_RSEM.txt	TRINITY_DN40706_c1_g1_i3	1914	1674.88	0	0	0	0
Neprilysin-1_1	VG_RSEM.txt	TRINITY_DN40706_c1_g1_i6	316	80.56	0	0	0	0
Neprilysin-1_1	VG_RSEM.txt	TRINITY_DN40706_c1_g1_i7	2243	2003.88	0	0	0	0
Neprilysin-1_1	VG_RSEM.txt	TRINITY_DN40706_c1_g1_i9	1571	1331.88	0	0	0	0
Neprilysin-1_1	VG_RSEM.txt	TRINITY_DN43042_c0_g1_i1	3167	2927.88	0	0	0	0
Neprilysin-1_1	VG_RSEM.txt	TRINITY_DN43042_c0_g1_i10	3436	3196.88	0	0	0	0
Neprilysin-1_1	VG_RSEM.txt	TRINITY_DN43042_c0_g1_i11	3355	3115.88	0	0	0	0
Neprilysin-1_1	VG_RSEM.txt	TRINITY_DN43042_c0_g1_i12	892	652.88	0	0	0	0
Neprilysin-1_1	VG_RSEM.txt	TRINITY_DN43042_c0_g1_i13	3352	3112.88	0	0	0	0
Neprilysin-1_1	VG_RSEM.txt	TRINITY_DN43042_c0_g1_i14	3456	3216.88	0	0	0	0
Neprilysin-1_1	VG_RSEM.txt	TRINITY_DN43042_c0_g1_i15	3251	3011.88	0	0	0	0
Neprilysin-1_1	VG_RSEM.txt	TRINITY_DN43042_c0_g1_i18	2005	1765.88	0	0	0	0
Neprilysin-1_1	VG_RSEM.txt	TRINITY_DN43042_c0_g1_i21	3324	3084.88	1.2	0	0.01	0.04
Neprilysin-1_1	VG_RSEM.txt	TRINITY_DN43042_c0_g1_i22	453	213.93	0	0	0	0
Neprilysin-1_1	VG_RSEM.txt	TRINITY_DN43042_c0_g1_i5	3271	3031.88	0	0	0	0
Neprilysin-1_1	VG_RSEM.txt	TRINITY_DN43042_c0_g1_i7	3540	3300.88	0	0	0	0
Neprilysin-1_1	VG_RSEM.txt	TRINITY_DN41166_c0_g1_i3	4712	4472.88	0	0	0	0
Neprilysin-1_1	VG_RSEM.txt	TRINITY_DN23821_c0_g3_i1	541	301.9	0	0	0	0
Neprilysin-1_1	VG_RSEM.txt	TRINITY_DN27804_c0_g1_i1	790	550.88	0	0	0	0
Neprilysin-1_1	VG_RSEM.txt	TRINITY_DN41984_c4_g7_i1	3492	3252.88	0	0	0	0
Neprilysin-1_1	VG_RSEM.txt	TRINITY_DN41984_c4_g7_i10	2778	2538.88	0	0	0	0
Neprilysin-1_1	VG_RSEM.txt	TRINITY_DN41984_c4_g7_i2	3286	3046.88	0	0	0	0
Neprilysin-1_1	VG_RSEM.txt	TRINITY_DN41984_c4_g7_i3	3299	3059.88	0	0	0	0
Neprilysin-1_1	VG_RSEM.txt	TRINITY_DN41984_c4_g7_i6	3505	3265.88	0	0	0	0
Neprilysin-1_1	VG_RSEM.txt	TRINITY_DN37329_c1_g1_i1	2207	1967.88	0	0	0	0
Peroxiredoxin-4_1	VG_RSEM.txt	TRINITY_DN44447_c0_g3_i4	900	660.88	1081.98	19.46	38.87	85.43
Peroxiredoxin-4_1	VG_RSEM.txt	TRINITY_DN37544_c0_g1_i1	1416	1176.88	314.97	3.18	6.35	96.9
Peroxiredoxin-4_1	VG_RSEM.txt	TRINITY_DN44447_c0_g3_i6	836	596.88	9.11	0.18	0.36	0.8
Peroxiredoxin-4_1	VG_RSEM.txt	TRINITY_DN44447_c0_g3_i7	1855	1615.88	24.61	0.18	0.36	0.79
Peroxiredoxin-4_1	VG_RSEM.txt	TRINITY_DN44447_c0_g3_i3	1846	1606.88	0	0	0	0
Phospholipase_A1_19	VG_RSEM.txt	TRINITY_DN37153_c1_g4_i1	536	296.9	205.76	8.24	16.45	69.05
Phospholipase_A1_19	VG_RSEM.txt	TRINITY_DN39575_c0_g2_i3	1259	1019.88	432.19	5.04	10.06	70.03
Phospholipase_A1_19	VG_RSEM.txt	TRINITY_DN36408_c0_g1_i1	1343	1103.88	409.85	4.41	8.81	67.08
Phospholipase_A1_19	VG_RSEM.txt	TRINITY_DN37153_c1_g4_i2	536	296.9	92.24	3.69	7.38	30.95
Phospholipase_A1_19	VG_RSEM.txt	TRINITY_DN42548_c0_g2_i4	893	653.88	172.33	3.13	6.26	22.16
Phospholipase_A1_19	VG_RSEM.txt	TRINITY_DN43678_c1_g2_i3	3282	3042.88	776.67	3.03	6.06	81.52
Phospholipase_A1_19	VG_RSEM.txt	TRINITY_DN42548_c0_g2_i13	843	603.88	105.74	2.08	4.16	14.73
Phospholipase_A1_19	VG_RSEM.txt	TRINITY_DN36408_c0_g1_i4	2027	1787.88	300.46	2	3.99	30.36
Phospholipase_A1_19	VG_RSEM.txt	TRINITY_DN5669_c0_g1_i1	308	73.45	9	1.46	2.91	100
Phospholipase_A1_19	VG_RSEM.txt	TRINITY_DN39575_c0_g2_i2	1283	1043.88	92.33	1.05	2.1	14.62
Phospholipase_A1_19	VG_RSEM.txt	TRINITY_DN43125_c1_g1_i3	6858	6618.88	450.48	0.81	1.62	7.76
Phospholipase_A1_19	VG_RSEM.txt	TRINITY_DN42913_c2_g1_i2	1300	1060.88	61	0.68	1.37	83.04
Phospholipase_A1_19	VG_RSEM.txt	TRINITY_DN42548_c0_g2_i10	926	686.88	39.36	0.68	1.36	4.82
Phospholipase_A1_19	VG_RSEM.txt	TRINITY_DN43125_c1_g1_i8	6909	6669.88	355.6	0.63	1.27	6.08
Phospholipase_A1_19	VG_RSEM.txt	TRINITY_DN42675_c1_g3_i8	1009	769.88	36.39	0.56	1.12	51
Phospholipase_A1_19	VG_RSEM.txt	TRINITY_DN39575_c0_g2_i14	1301	1061.88	44.33	0.5	0.99	6.9
Phospholipase_A1_19	VG_RSEM.txt	TRINITY_DN39633_c1_g2_i2	617	377.89	13.55	0.43	0.85	53.53
Phospholipase_A1_19	VG_RSEM.txt	TRINITY_DN39633_c1_g2_i1	671	431.89	13.45	0.37	0.74	46.47
Phospholipase_A1_19	VG_RSEM.txt	TRINITY_DN42179_c0_g2_i11	936	696.88	15.31	0.26	0.52	33.17
Phospholipase_A1_19	VG_RSEM.txt	TRINITY_DN91928_c0_g1_i1	738	498.88	11	0.26	0.52	100
Phospholipase_A1_19	VG_RSEM.txt	TRINITY_DN42675_c1_g3_i5	3345	3105.88	64.79	0.25	0.5	22.51
Phospholipase_A1_19	VG_RSEM.txt	TRINITY_DN42179_c0_g2_i4	1663	1423.88	28.72	0.24	0.48	30.45
Phospholipase_A1_19	VG_RSEM.txt	TRINITY_DN39575_c0_g2_i6	1522	1282.88	22.88	0.21	0.42	2.95
Phospholipase_A1_19	VG_RSEM.txt	TRINITY_DN42675_c1_g3_i2	2107	1867.88	32.1	0.2	0.41	18.55
Phospholipase_A1_19	VG_RSEM.txt	TRINITY_DN39348_c0_g1_i9	2511	2271.88	30.11	0.16	0.31	75.81
Phospholipase_A1_19	VG_RSEM.txt	TRINITY_DN42179_c0_g2_i9	1731	1491.88	17.01	0.14	0.27	17.21
Phospholipase_A1_19	VG_RSEM.txt	TRINITY_DN43125_c1_g1_i2	7013	6773.88	77.52	0.14	0.27	1.31
Phospholipase_A1_19	VG_RSEM.txt	TRINITY_DN42913_c2_g1_i1	835	595.88	7	0.14	0.28	16.96
Phospholipase_A1_19	VG_RSEM.txt	TRINITY_DN22434_c0_g2_i1	1029	789.88	8	0.12	0.24	100
Phospholipase_A1_19	VG_RSEM.txt	TRINITY_DN43678_c1_g2_i2	1583	1343.88	11.17	0.1	0.2	2.66
Phospholipase_A1_19	VG_RSEM.txt	TRINITY_DN28583_c0_g1_i1	586	346.9	2.63	0.09	0.18	100
Phospholipase_A1_19	VG_RSEM.txt	TRINITY_DN39575_c0_g2_i11	1454	1214.88	7.73	0.08	0.15	1.05
Phospholipase_A1_19	VG_RSEM.txt	TRINITY_DN36408_c0_g1_i5	1405	1165.88	7.13	0.07	0.15	1.1
Phospholipase_A1_19	VG_RSEM.txt	TRINITY_DN42675_c1_g3_i1	1135	895.88	5.23	0.07	0.14	6.29
Phospholipase_A1_19	VG_RSEM.txt	TRINITY_DN43125_c1_g1_i9	2141	1901.88	7.59	0.05	0.09	0.46
Phospholipase_A1_19	VG_RSEM.txt	TRINITY_DN36408_c0_g1_i2	1629	1389.88	3.96	0.03	0.07	0.51
Phospholipase_A1_19	VG_RSEM.txt	TRINITY_DN39575_c0_g2_i4	1437	1197.88	2.7	0.03	0.05	0.37
Phospholipase_A1_19	VG_RSEM.txt	TRINITY_DN42675_c1_g3_i6	3837	3597.88	5.49	0.02	0.04	1.65
Phospholipase_A1_19	VG_RSEM.txt	TRINITY_DN42548_c0_g2_i9	976	736.88	0.42	0.01	0.01	0.05
Phospholipase_A1_19	VG_RSEM.txt	TRINITY_DN39575_c0_g2_i8	1478	1238.88	0.57	0.01	0.01	0.08
Phospholipase_A1_19	VG_RSEM.txt	TRINITY_DN36877_c1_g2_i3	774	534.88	0	0	0	0
Phospholipase_A1_19	VG_RSEM.txt	TRINITY_DN36877_c1_g2_i4	789	549.88	0	0	0	0
Phospholipase_A1_19	VG_RSEM.txt	TRINITY_DN49613_c0_g1_i1	315	79.67	0	0	0	0
Phospholipase_A1_19	VG_RSEM.txt	TRINITY_DN42179_c0_g2_i1	1669	1429.88	0	0	0	0
Phospholipase_A1_19	VG_RSEM.txt	TRINITY_DN42179_c0_g2_i10	1075	835.88	0	0	0	0
Phospholipase_A1_19	VG_RSEM.txt	TRINITY_DN42179_c0_g2_i3	1601	1361.88	0	0	0	0
Phospholipase_A1_19	VG_RSEM.txt	TRINITY_DN42179_c0_g2_i5	1557	1317.88	0	0	0	0
Phospholipase_A1_19	VG_RSEM.txt	TRINITY_DN42179_c0_g2_i6	1495	1255.88	0	0	0	0
Phospholipase_A1_19	VG_RSEM.txt	TRINITY_DN42179_c0_g2_i7	1563	1323.88	0	0	0	0
Phospholipase_A1_19	VG_RSEM.txt	TRINITY_DN42179_c0_g2_i8	1625	1385.88	0	0	0	0
Phospholipase_A1_19	VG_RSEM.txt	TRINITY_DN43125_c1_g1_i4	7013	6773.88	0.02	0	0	0
Phospholipase_A1_19	VG_RSEM.txt	TRINITY_DN43125_c1_g1_i6	6909	6669.88	0.08	0	0	0
Phospholipase_A1_19	VG_RSEM.txt	TRINITY_DN43125_c1_g1_i11	6858	6618.88	0.1	0	0	0
Phospholipase_A1_19	VG_RSEM.txt	TRINITY_DN39348_c0_g1_i2	1711	1471.88	0	0	0	0
Phospholipase_A1_19	VG_RSEM.txt	TRINITY_DN39348_c0_g1_i3	2411	2171.88	0	0	0	0
Phospholipase_A1_19	VG_RSEM.txt	TRINITY_DN39348_c0_g1_i4	1641	1401.88	0	0	0	0
Phospholipase_A1_19	VG_RSEM.txt	TRINITY_DN39348_c0_g1_i5	2277	2037.88	0	0	0	0
Phospholipase_A1_19	VG_RSEM.txt	TRINITY_DN39348_c0_g1_i6	2149	1909.88	0	0	0	0
Phospholipase_A1_19	VG_RSEM.txt	TRINITY_DN39348_c0_g1_i7	2461	2221.88	0	0	0	0
Phospholipase_A1_19	VG_RSEM.txt	TRINITY_DN39348_c0_g1_i8	2189	1949.88	0	0	0	0
Phospholipase_A1_19	VG_RSEM.txt	TRINITY_DN39348_c0_g1_i10	2529	2289.88	0	0	0	0
Phospholipase_A1_19	VG_RSEM.txt	TRINITY_DN39348_c0_g1_i11	2391	2151.88	0	0	0	0
Phospholipase_A1_19	VG_RSEM.txt	TRINITY_DN39348_c0_g1_i13	2219	1979.88	0	0	0	0
Phospholipase_A1_19	VG_RSEM.txt	TRINITY_DN39348_c0_g1_i14	1611	1371.88	0	0	0	0
Phospholipase_A1_19	VG_RSEM.txt	TRINITY_DN39348_c0_g1_i15	2361	2121.88	0	0	0	0
Phospholipase_A1_19	VG_RSEM.txt	TRINITY_DN39348_c0_g1_i16	2119	1879.88	0	0	0	0
Phospholipase_A1_19	VG_RSEM.txt	TRINITY_DN39348_c0_g1_i17	2441	2201.88	0	0	0	0
Phospholipase_A1_19	VG_RSEM.txt	TRINITY_DN5031_c0_g1_i1	340	102.68	0	0	0	0
Phospholipase_A1_19	VG_RSEM.txt	TRINITY_DN42913_c1_g1_i1	398	159.05	0	0	0	0
Phospholipase_A1_19	VG_RSEM.txt	TRINITY_DN42913_c1_g1_i2	501	261.91	0	0	0	0
Phospholipase_A1_19	VG_RSEM.txt	TRINITY_DN42913_c1_g1_i6	398	159.05	0	0	0	0
Phospholipase_A1_19	VG_RSEM.txt	TRINITY_DN42913_c1_g1_i7	501	261.91	0	0	0	0
Phospholipase_A1_19	VG_RSEM.txt	TRINITY_DN42913_c2_g1_i3	1294	1054.88	0	0	0	0
Phospholipase_A1_19	VG_RSEM.txt	TRINITY_DN42913_c2_g1_i4	1295	1055.88	0	0	0	0
Phospholipase_A1_19	VG_RSEM.txt	TRINITY_DN29149_c0_g1_i1	1196	956.88	0	0	0	0
Phospholipase_A1_19	VG_RSEM.txt	TRINITY_DN29149_c0_g1_i3	1703	1463.88	0	0	0	0
Phospholipase_A1_19	VG_RSEM.txt	TRINITY_DN42675_c1_g3_i10	1468	1228.88	0	0	0	0
Phospholipase_A1_19	VG_RSEM.txt	TRINITY_DN42675_c1_g3_i11	1078	838.88	0	0	0	0
Phospholipase_A1_19	VG_RSEM.txt	TRINITY_DN42675_c1_g3_i3	966	726.88	0	0	0	0
Phospholipase_A1_19	VG_RSEM.txt	TRINITY_DN42675_c1_g3_i9	3743	3503.88	0	0	0	0
Phospholipase_A1_19	VG_RSEM.txt	TRINITY_DN39575_c0_g2_i7	1327	1087.88	0	0	0	0
Phospholipase_A1_19	VG_RSEM.txt	TRINITY_DN39575_c0_g2_i9	1369	1129.88	0	0	0	0
Phospholipase_A1_19	VG_RSEM.txt	TRINITY_DN39575_c0_g2_i10	1413	1173.88	0	0	0	0
Phospholipase_A1_19	VG_RSEM.txt	TRINITY_DN39575_c0_g2_i12	1496	1256.88	0	0	0	0
Phospholipase_A1_19	VG_RSEM.txt	TRINITY_DN39575_c0_g2_i13	1351	1111.88	0	0	0	0
Phospholipase_A2_1	VG_RSEM.txt	TRINITY_DN44093_c2_g4_i2	556	316.9	169.75	6.37	12.72	81.29
Phospholipase_A2_1	VG_RSEM.txt	TRINITY_DN31915_c0_g1_i1	1403	1163.88	129	1.32	2.63	100
Phospholipase_A2_1	VG_RSEM.txt	TRINITY_DN38757_c0_g1_i1	1376	1136.88	47	0.49	0.98	100
Phospholipase_A2_1	VG_RSEM.txt	TRINITY_DN44093_c2_g4_i1	460	220.92	5.3	0.29	0.57	3.64
Phospholipase_A2_1	VG_RSEM.txt	TRINITY_DN44093_c2_g4_i5	394	155.09	3.79	0.29	0.58	3.71
Phospholipase_A2_1	VG_RSEM.txt	TRINITY_DN44209_c0_g1_i19	3020	2780.88	23.06	0.1	0.2	8.31
Phospholipase_A2_1	VG_RSEM.txt	TRINITY_DN44209_c0_g1_i7	3390	3150.88	10.42	0.04	0.08	3.31
Phospholipase_A2_1	VG_RSEM.txt	TRINITY_DN44209_c0_g1_i2	2661	2421.88	0	0	0	0
Phospholipase_A2_1	VG_RSEM.txt	TRINITY_DN44209_c0_g1_i3	3329	3089.88	0	0	0	0
Phospholipase_A2_1	VG_RSEM.txt	TRINITY_DN44209_c0_g1_i5	4112	3872.88	0	0	0	0
Phospholipase_A2_1	VG_RSEM.txt	TRINITY_DN44209_c0_g1_i14	2959	2719.88	0	0	0	0
Phospholipase_A2_1	VG_RSEM.txt	TRINITY_DN44209_c0_g1_i17	2575	2335.88	0	0	0	0
Plancitoxin-1_1	VG_RSEM.txt	TRINITY_DN34099_c0_g3_i1	1800	1560.88	19	0.14	0.29	100
Plancitoxin-1_1	VG_RSEM.txt	TRINITY_DN34099_c0_g2_i1	532	292.91	0	0	0	0
Plancitoxin-1_1	VG_RSEM.txt	TRINITY_DN34099_c0_g3_i2	1083	843.88	0	0	0	0
Plancitoxin-1_1	VG_RSEM.txt	TRINITY_DN34099_c0_g3_i3	1627	1387.88	0	0	0	0
Putative_protein-glutamate_O-methyltransferase_1	VG_RSEM.txt	TRINITY_DN41159_c0_g2_i4	2936	2696.88	72.23	0.32	0.64	40.07
Putative_protein-glutamate_O-methyltransferase_1	VG_RSEM.txt	TRINITY_DN41159_c0_g2_i5	1299	1059.88	18.54	0.21	0.42	26.17
Putative_protein-glutamate_O-methyltransferase_1	VG_RSEM.txt	TRINITY_DN41159_c0_g2_i3	1380	1140.88	11.3	0.12	0.24	14.82
Putative_protein-glutamate_O-methyltransferase_1	VG_RSEM.txt	TRINITY_DN41159_c0_g2_i1	2913	2673.88	25.84	0.11	0.23	14.46
Putative_protein-glutamate_O-methyltransferase_1	VG_RSEM.txt	TRINITY_DN41159_c0_g2_i2	1276	1036.88	3.1	0.04	0.07	4.48
Serine_proteinase-like_BMK-CBP_1	VG_RSEM.txt	TRINITY_DN43918_c5_g1_i5	1261	1021.88	29.23	0.34	0.68	6.42
Serine_proteinase-like_BMK-CBP_1	VG_RSEM.txt	TRINITY_DN43918_c5_g1_i3	2316	2076.88	8.59	0.05	0.1	0.93
Serine_proteinase-like_BMK-CBP_1	VG_RSEM.txt	TRINITY_DN43918_c5_g1_i4	2316	2076.88	5.09	0.03	0.06	0.55
Serine_proteinase-like_BMK-CBP_1	VG_RSEM.txt	TRINITY_DN7792_c0_g2_i1	376	137.35	0	0	0	0
Snake_venom_metalloproteinase_Ac1_1	VG_RSEM.txt	TRINITY_DN42586_c0_g1_i3	4814	4574.88	266.88	0.69	1.39	66.55
Snake_venom_metalloproteinase_Ac1_1	VG_RSEM.txt	TRINITY_DN43602_c0_g6_i6	753	513.88	13.31	0.31	0.62	12.25
Snake_venom_metalloproteinase_Ac1_1	VG_RSEM.txt	TRINITY_DN43602_c0_g6_i5	673	433.89	0	0	0	0
Snake_venom_metalloproteinase_Ac1_1	VG_RSEM.txt	TRINITY_DN43602_c0_g6_i7	489	249.92	0	0	0	0
Snake_venom_metalloproteinase_fibrolase_19	VG_RSEM.txt	TRINITY_DN40024_c0_g1_i2	2781	2541.88	171	0.8	1.6	100
Snake_venom_metalloproteinase_fibrolase_19	VG_RSEM.txt	TRINITY_DN40024_c0_g1_i1	2676	2436.88	0	0	0	0
Techylectin-like_protein_1	VG_RSEM.txt	TRINITY_DN33694_c0_g2_i1	1870	1630.88	65	0.47	0.95	100
Techylectin-like_protein_1	VG_RSEM.txt	TRINITY_DN27059_c0_g2_i1	1141	901.88	0	0	0	0
Thrombin-like_enzyme_ancrod_11	VG_RSEM.txt	TRINITY_DN44773_c6_g5_i3	821	581.88	1466.66	29.96	59.84	71.62
Thrombin-like_enzyme_ancrod_11	VG_RSEM.txt	TRINITY_DN29431_c0_g1_i1	486	246.92	39	1.88	3.75	100
Thrombin-like_enzyme_ancrod_11	VG_RSEM.txt	TRINITY_DN40401_c0_g1_i13	3591	3351.88	267.49	0.95	1.89	26.6
Thrombin-like_enzyme_ancrod_11	VG_RSEM.txt	TRINITY_DN40401_c0_g1_i3	1083	843.88	40.98	0.58	1.15	16.18
Thrombin-like_enzyme_ancrod_11	VG_RSEM.txt	TRINITY_DN43367_c0_g1_i6	5578	5338.88	241.63	0.54	1.07	20.19
Thrombin-like_enzyme_ancrod_11	VG_RSEM.txt	TRINITY_DN43918_c5_g5_i2	499	259.91	11	0.5	1	100
Thrombin-like_enzyme_ancrod_11	VG_RSEM.txt	TRINITY_DN43367_c0_g1_i1	4578	4338.88	146.57	0.4	0.8	15.07
Thrombin-like_enzyme_ancrod_11	VG_RSEM.txt	TRINITY_DN90501_c0_g1_i1	709	469.88	14	0.35	0.71	100
Thrombin-like_enzyme_ancrod_11	VG_RSEM.txt	TRINITY_DN37055_c0_g2_i1	393	154.1	3.78	0.29	0.58	31.36
Thrombin-like_enzyme_ancrod_11	VG_RSEM.txt	TRINITY_DN43367_c0_g1_i9	5720	5480.88	62.85	0.14	0.27	5.12
Thrombin-like_enzyme_ancrod_11	VG_RSEM.txt	TRINITY_DN40401_c0_g1_i2	3666	3426.88	27.71	0.1	0.19	2.69
Thrombin-like_enzyme_ancrod_11	VG_RSEM.txt	TRINITY_DN40401_c0_g1_i5	3763	3523.88	22.89	0.08	0.15	2.16
Thrombin-like_enzyme_ancrod_11	VG_RSEM.txt	TRINITY_DN43367_c0_g1_i3	6237	5997.88	26.5	0.05	0.1	1.97
Thrombin-like_enzyme_ancrod_11	VG_RSEM.txt	TRINITY_DN43367_c0_g1_i4	6170	5930.88	7.91	0.02	0.03	0.59
Thrombin-like_enzyme_ancrod_11	VG_RSEM.txt	TRINITY_DN43367_c0_g1_i10	343	105.52	0	0	0	0
Thrombin-like_enzyme_ancrod_11	VG_RSEM.txt	TRINITY_DN44839_c3_g4_i4	2816	2576.88	0	0	0	0
Thrombin-like_enzyme_ancrod_11	VG_RSEM.txt	TRINITY_DN44847_c4_g1_i10	1041	801.88	0	0	0	0
Thrombin-like_enzyme_TLBm_1	VG_RSEM.txt	TRINITY_DN37055_c0_g2_i2	839	599.88	32.22	0.64	1.28	68.64
Toxin_Bcs_III_15	VG_RSEM.txt	TRINITY_DN41024_c0_g2_i7	3818	3578.88	25.17	0.08	0.17	6.49
Toxin_Bcs_III_15	VG_RSEM.txt	TRINITY_DN41024_c0_g2_i6	658	418.89	0	0	0	0
Turripeptide_Ici9	VG_RSEM.txt	TRINITY_DN15551_c0_g1_i1	941	701.88	2	0.03	0.07	100
Venom_allergen_3_30	VG_RSEM.txt	TRINITY_DN44812_c2_g2_i2	517	277.91	81653.2	3492.8	6975.54	99.65
Venom_allergen_3_30	VG_RSEM.txt	TRINITY_DN41832_c0_g4_i2	668	428.89	52510.8	1455.49	2906.79	97.44
Venom_allergen_3_30	VG_RSEM.txt	TRINITY_DN33658_c0_g3_i1	312	76.99	3321.52	512.89	1024.3	100
Venom_allergen_3_30	VG_RSEM.txt	TRINITY_DN44812_c2_g3_i1	460	220.92	6827.37	367.38	733.7	100
Venom_allergen_3_30	VG_RSEM.txt	TRINITY_DN44812_c2_g2_i1	615	375.89	387.41	12.25	24.47	0.35
Venom_allergen_4_1	VG_RSEM.txt	TRINITY_DN39995_c1_g1_i8	481	241.92	9.44	0.46	0.93	17.48
Venom_allergen_4_1	VG_RSEM.txt	TRINITY_DN44064_c0_g3_i7	342	104.57	0	0	0	0
Venom_allergen_5_1	VG_RSEM.txt	TRINITY_DN41452_c0_g8_i3	1559	1319.88	1804.11	16.25	32.45	75.72
Venom_allergen_5_1	VG_RSEM.txt	TRINITY_DN41452_c0_g8_i8	1789	1549.88	166.55	1.28	2.55	5.95
Venom_allergen_5_1	VG_RSEM.txt	TRINITY_DN41452_c0_g8_i6	1404	1164.88	67.68	0.69	1.38	3.22
Venom_allergen_5_1	VG_RSEM.txt	TRINITY_DN41452_c0_g8_i7	2124	1884.88	27.22	0.17	0.34	0.8
Venom_allergen_5_15	VG_RSEM.txt	TRINITY_DN51992_c0_g1_i1	300	66.49	0	0	0	0
Venom_peptide_isomerase_heavy_chain_2	VG_RSEM.txt	TRINITY_DN41899_c0_g3_i2	702	462.88	77.11	1.98	3.95	69.27
Venom_peptide_isomerase_heavy_chain_2	VG_RSEM.txt	TRINITY_DN36875_c0_g3_i2	445	205.93	32	1.85	3.69	82.12
Venom_peptide_isomerase_heavy_chain_2	VG_RSEM.txt	TRINITY_DN44773_c6_g5_i4	602	362.89	39.25	1.29	2.57	3.07
Venom_peptide_isomerase_heavy_chain_2	VG_RSEM.txt	TRINITY_DN30563_c0_g2_i1	1196	956.88	91.51	1.14	2.27	100
Venom_peptide_isomerase_heavy_chain_2	VG_RSEM.txt	TRINITY_DN43689_c4_g11_i1	474	234.92	17	0.86	1.72	100
Venom_peptide_isomerase_heavy_chain_2	VG_RSEM.txt	TRINITY_DN41899_c0_g3_i5	445	205.93	14.67	0.85	1.69	29.63
Venom_peptide_isomerase_heavy_chain_2	VG_RSEM.txt	TRINITY_DN18805_c0_g1_i1	419	179.96	9	0.59	1.19	100
Venom_peptide_isomerase_heavy_chain_2	VG_RSEM.txt	TRINITY_DN44158_c0_g2_i2	2717	2477.88	118.2	0.57	1.13	18.8
Venom_peptide_isomerase_heavy_chain_2	VG_RSEM.txt	TRINITY_DN72107_c0_g1_i1	653	413.89	13	0.37	0.75	100
Venom_peptide_isomerase_heavy_chain_2	VG_RSEM.txt	TRINITY_DN30401_c0_g1_i1	990	750.88	21	0.33	0.66	100
Venom_peptide_isomerase_heavy_chain_2	VG_RSEM.txt	TRINITY_DN38232_c1_g1_i1	1669	1429.88	28.88	0.24	0.48	83.87
Venom_peptide_isomerase_heavy_chain_2	VG_RSEM.txt	TRINITY_DN44158_c0_g2_i13	1570	1330.88	20.49	0.18	0.37	6.07
Venom_peptide_isomerase_heavy_chain_2	VG_RSEM.txt	TRINITY_DN40401_c0_g1_i1	3678	3438.88	47.94	0.17	0.33	4.65
Venom_peptide_isomerase_heavy_chain_2	VG_RSEM.txt	TRINITY_DN30551_c0_g1_i1	1759	1519.88	20.26	0.16	0.32	19.97
Venom_peptide_isomerase_heavy_chain_2	VG_RSEM.txt	TRINITY_DN44158_c0_g2_i3	2593	2353.88	25.13	0.13	0.25	4.21
Venom_peptide_isomerase_heavy_chain_2	VG_RSEM.txt	TRINITY_DN39691_c0_g1_i2	1410	1170.88	7.6	0.08	0.15	21.81
Venom_peptide_isomerase_heavy_chain_2	VG_RSEM.txt	TRINITY_DN30551_c0_g1_i2	1777	1537.88	6.42	0.05	0.1	6.25
Venom_peptide_isomerase_heavy_chain_2	VG_RSEM.txt	TRINITY_DN38232_c1_g1_i3	1043	803.88	3.12	0.05	0.09	16.13
Venom_peptide_isomerase_heavy_chain_2	VG_RSEM.txt	TRINITY_DN34654_c0_g1_i1	1152	912.88	2	0.03	0.05	100
Venom_peptide_isomerase_heavy_chain_2	VG_RSEM.txt	TRINITY_DN41899_c0_g3_i1	702	462.88	1.22	0.03	0.06	1.09
Venom_peptide_isomerase_heavy_chain_2	VG_RSEM.txt	TRINITY_DN36875_c0_g3_i3	437	197.93	0	0	0	0
Venom_peptide_isomerase_heavy_chain_2	VG_RSEM.txt	TRINITY_DN38232_c1_g1_i4	1638	1398.88	0	0	0	0
Venom_peptide_isomerase_heavy_chain_2	VG_RSEM.txt	TRINITY_DN44158_c0_g2_i5	2317	2077.88	0	0	0	0
Venom_peptide_isomerase_heavy_chain_2	VG_RSEM.txt	TRINITY_DN40401_c0_g1_i11	3661	3421.88	0	0	0	0
Venom_peptide_isomerase_heavy_chain_2	VG_RSEM.txt	TRINITY_DN40401_c0_g1_i12	1180	940.88	0	0	0	0
Venom_peptide_isomerase_heavy_chain_2	VG_RSEM.txt	TRINITY_DN40401_c0_g1_i14	3586	3346.88	0	0	0	0
Venom_peptide_isomerase_heavy_chain_2	VG_RSEM.txt	TRINITY_DN38594_c0_g1_i2	1611	1371.88	0	0	0	0
Venom_peptide_isomerase_heavy_chain_2	VG_RSEM.txt	TRINITY_DN41899_c0_g3_i3	445	205.93	0	0	0	0
Venom_peptide_isomerase_heavy_chain_2	VG_RSEM.txt	TRINITY_DN26795_c0_g1_i1	356	117.92	0	0	0	0
Venom_peptide_isomerase_heavy_chain_2	VG_RSEM.txt	TRINITY_DN39691_c0_g1_i6	1253	1013.88	0	0	0	0
Venom_peptide_isomerase_heavy_chain_2	VG_RSEM.txt	TRINITY_DN39589_c1_g1_i2	529	289.91	0	0	0	0
Venom_protein_55	VG_RSEM.txt	TRINITY_DN37059_c0_g1_i1	3391	3151.88	19	0.07	0.14	100
Venom_protein_55	VG_RSEM.txt	TRINITY_DN37059_c0_g2_i1	1027	787.88	0	0	0	0
Venom_prothrombin_activator_pseutarin-C_catalytic_subunit_12	VG_RSEM.txt	TRINITY_DN44773_c6_g5_i1	511	271.91	240.3	10.51	20.98	25.11
Venom_prothrombin_activator_pseutarin-C_catalytic_subunit_12	VG_RSEM.txt	TRINITY_DN44976_c4_g7_i2	372	133.44	39	3.47	6.94	57.83
Venom_prothrombin_activator_pseutarin-C_catalytic_subunit_12	VG_RSEM.txt	TRINITY_DN41899_c0_g1_i3	502	262.91	58.15	2.63	5.25	98
Venom_prothrombin_activator_pseutarin-C_catalytic_subunit_12	VG_RSEM.txt	TRINITY_DN44773_c6_g6_i1	511	271.91	32.5	1.42	2.84	53.63
Venom_prothrombin_activator_pseutarin-C_catalytic_subunit_12	VG_RSEM.txt	TRINITY_DN44300_c0_g4_i1	895	655.88	74.39	1.35	2.69	60.16
Venom_prothrombin_activator_pseutarin-C_catalytic_subunit_12	VG_RSEM.txt	TRINITY_DN44976_c4_g7_i4	379	140.29	14	1.19	2.37	19.74
Venom_prothrombin_activator_pseutarin-C_catalytic_subunit_12	VG_RSEM.txt	TRINITY_DN44839_c3_g4_i1	3036	2796.88	242.2	1.03	2.06	3.43
Venom_prothrombin_activator_pseutarin-C_catalytic_subunit_12	VG_RSEM.txt	TRINITY_DN43238_c0_g2_i1	691	451.88	36.2	0.95	1.9	100
Venom_prothrombin_activator_pseutarin-C_catalytic_subunit_12	VG_RSEM.txt	TRINITY_DN41087_c0_g1_i5	2086	1846.88	130.79	0.84	1.68	53.85
Venom_prothrombin_activator_pseutarin-C_catalytic_subunit_12	VG_RSEM.txt	TRINITY_DN44976_c4_g7_i11	368	129.54	8	0.73	1.47	12.22
Venom_prothrombin_activator_pseutarin-C_catalytic_subunit_12	VG_RSEM.txt	TRINITY_DN37055_c0_g1_i1	414	174.97	8	0.54	1.09	83.15
Venom_prothrombin_activator_pseutarin-C_catalytic_subunit_12	VG_RSEM.txt	TRINITY_DN43751_c1_g1_i17	416	176.96	8	0.54	1.07	1.28
Venom_prothrombin_activator_pseutarin-C_catalytic_subunit_12	VG_RSEM.txt	TRINITY_DN44976_c4_g7_i10	241	22.69	1	0.52	1.05	8.72
Venom_prothrombin_activator_pseutarin-C_catalytic_subunit_12	VG_RSEM.txt	TRINITY_DN44300_c0_g4_i3	389	150.14	4.37	0.35	0.69	15.44
Venom_prothrombin_activator_pseutarin-C_catalytic_subunit_12	VG_RSEM.txt	TRINITY_DN41087_c0_g1_i6	2169	1929.88	43.51	0.27	0.54	17.15
Venom_prothrombin_activator_pseutarin-C_catalytic_subunit_12	VG_RSEM.txt	TRINITY_DN23446_c0_g2_i1	774	534.88	10	0.22	0.44	100
Venom_prothrombin_activator_pseutarin-C_catalytic_subunit_12	VG_RSEM.txt	TRINITY_DN41087_c0_g1_i3	1260	1020.88	13.85	0.16	0.32	10.32
Venom_prothrombin_activator_pseutarin-C_catalytic_subunit_12	VG_RSEM.txt	TRINITY_DN44976_c4_g7_i7	371	132.46	1	0.09	0.18	1.49
Venom_prothrombin_activator_pseutarin-C_catalytic_subunit_12	VG_RSEM.txt	TRINITY_DN41899_c0_g1_i4	1094	854.88	3.85	0.05	0.11	2
Venom_prothrombin_activator_pseutarin-C_catalytic_subunit_12	VG_RSEM.txt	TRINITY_DN44158_c0_g2_i18	1463	1223.88	3.31	0.03	0.06	1.06
Venom_prothrombin_activator_pseutarin-C_catalytic_subunit_12	VG_RSEM.txt	TRINITY_DN37055_c0_g1_i2	414	174.97	0	0	0	0
Venom_prothrombin_activator_pseutarin-C_catalytic_subunit_12	VG_RSEM.txt	TRINITY_DN43689_c4_g11_i3	430	190.94	0	0	0	0
Venom_prothrombin_activator_pseutarin-C_catalytic_subunit_12	VG_RSEM.txt	TRINITY_DN44158_c0_g2_i7	2800	2560.88	0	0	0	0
Venom_prothrombin_activator_pseutarin-C_catalytic_subunit_12	VG_RSEM.txt	TRINITY_DN44158_c0_g2_i15	2400	2160.88	0	0	0	0
Venom_prothrombin_activator_pseutarin-C_catalytic_subunit_12	VG_RSEM.txt	TRINITY_DN44158_c0_g2_i16	1653	1413.88	0	0	0	0
Venom_prothrombin_activator_pseutarin-C_catalytic_subunit_12	VG_RSEM.txt	TRINITY_DN44158_c0_g2_i17	2676	2436.88	0	0	0	0
Venom_prothrombin_activator_pseutarin-C_catalytic_subunit_12	VG_RSEM.txt	TRINITY_DN44773_c6_g5_i2	525	285.91	0	0	0	0
Venom_prothrombin_activator_pseutarin-C_catalytic_subunit_12	VG_RSEM.txt	TRINITY_DN44976_c4_g7_i1	368	129.54	0	0	0	0
Venom_prothrombin_activator_pseutarin-C_catalytic_subunit_12	VG_RSEM.txt	TRINITY_DN44976_c4_g7_i3	371	132.46	0	0	0	0
Venom_prothrombin_activator_pseutarin-C_catalytic_subunit_12	VG_RSEM.txt	TRINITY_DN41087_c0_g1_i2	2075	1835.88	0	0	0	0
Venom_prothrombin_activator_pseutarin-C_catalytic_subunit_12	VG_RSEM.txt	TRINITY_DN41087_c0_g1_i4	1241	1001.88	0	0	0	0
Venom_prothrombin_activator_pseutarin-C_catalytic_subunit_12	VG_RSEM.txt	TRINITY_DN43751_c1_g1_i11	364	125.65	0	0	0	0
Zinc_metalloproteinase@disintegrin_107	VG_RSEM.txt	TRINITY_DN44096_c0_g1_i1	1596	1356.88	227.33	1.99	3.98	68.45
Zinc_metalloproteinase@disintegrin_107	VG_RSEM.txt	TRINITY_DN40924_c0_g1_i1	2642	2402.88	327.6	1.62	3.24	49.63
Zinc_metalloproteinase@disintegrin_107	VG_RSEM.txt	TRINITY_DN40924_c0_g1_i12	721	481.88	18.32	0.45	0.9	13.84
Zinc_metalloproteinase@disintegrin_107	VG_RSEM.txt	TRINITY_DN40924_c0_g1_i4	2706	2466.88	79.83	0.38	0.77	11.78
Zinc_metalloproteinase@disintegrin_107	VG_RSEM.txt	TRINITY_DN40924_c0_g1_i11	3192	2952.88	28.66	0.12	0.23	3.53
Zinc_metalloproteinase@disintegrin_107	VG_RSEM.txt	TRINITY_DN40924_c0_g1_i5	3092	2852.88	16.29	0.07	0.14	2.08
Zinc_metalloproteinase@disintegrin_107	VG_RSEM.txt	TRINITY_DN40924_c0_g1_i7	3156	2916.88	17.67	0.07	0.14	2.2
Zinc_metalloproteinase@disintegrin_107	VG_RSEM.txt	TRINITY_DN40924_c0_g1_i13	2721	2481.88	8.3	0.04	0.08	1.22
Zinc_metalloproteinase@disintegrin_107	VG_RSEM.txt	TRINITY_DN40924_c0_g1_i3	2742	2502.88	1.38	0.01	0.01	0.2
Zinc_metalloproteinase@disintegrin_107	VG_RSEM.txt	TRINITY_DN40924_c0_g1_i8	2806	2566.88	1.14	0.01	0.01	0.16
Zinc_metalloproteinase@disintegrin_107	VG_RSEM.txt	TRINITY_DN40924_c0_g1_i10	371	132.46	0	0	0	0
Zinc_metalloproteinase-disintegrin-like_alternagin_2	VG_RSEM.txt	TRINITY_DN40924_c0_g1_i2	1576	1336.88	0	0	0	0
Zinc_metalloproteinase-disintegrin-like_alternagin_2	VG_RSEM.txt	TRINITY_DN40924_c0_g1_i6	1426	1186.88	0	0	0	0
Zinc_metalloproteinase-disintegrin-like_VAP2B_272	VG_RSEM.txt	TRINITY_DN43826_c0_g5_i4	2041	1801.88	581.49	3.84	7.66	48.42
Zinc_metalloproteinase-disintegrin-like_VAP2B_272	VG_RSEM.txt	TRINITY_DN43826_c0_g5_i3	3999	3759.88	379.09	1.2	2.39	15.13
Zinc_metalloproteinase-disintegrin-like_VAP2B_272	VG_RSEM.txt	TRINITY_DN43826_c0_g5_i2	2227	1987.88	177.11	1.06	2.12	13.37
Zinc_metalloproteinase-disintegrin-like_VAP2B_272	VG_RSEM.txt	TRINITY_DN43826_c0_g5_i6	3505	3265.88	3.88	0.01	0.03	0.18
Zinc_metalloproteinase-disintegrin-like_VAP2B_272	VG_RSEM.txt	TRINITY_DN43826_c0_g5_i5	3319	3079.88	0.22	0	0	0.01

## Sheet: OTHER DATA
Please note
The file/outputs from Venomix used in composing this manuscript are too large to submit here. Please find them on the Bitbucket page associated with the program:
https://bitbucket.org/JasonMacrander/venomix
