# Supplementary figures and images for: Venomix: a simple bioinformatic pipeline for identifying and characterizing toxin gene candidates from transcriptomic data (part 1 of 3)
Source: PeerJ journal article supplement (doi:10.7717/peerj.5361), 2018-07-31

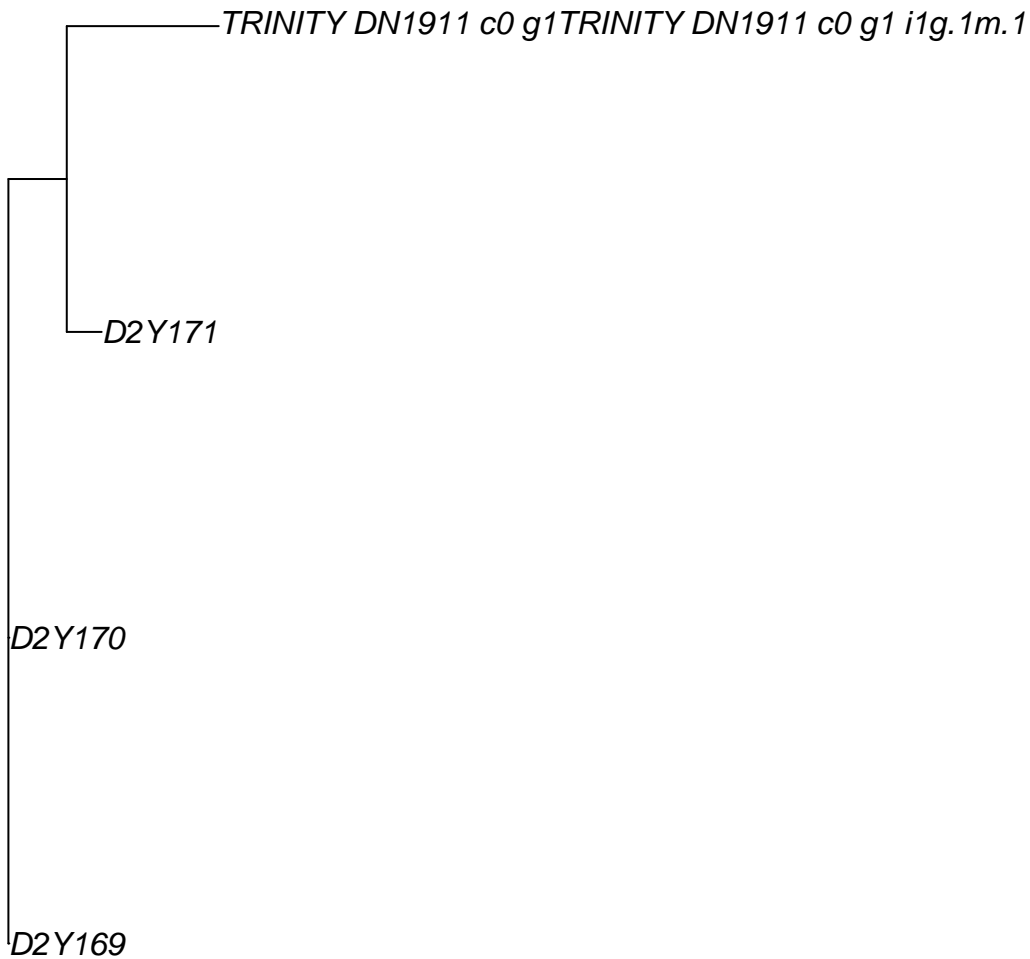

Supplement: S_F_1_C_sponsalis.tar.gz [file S_F_1_C_sponsalis.tar.gz]

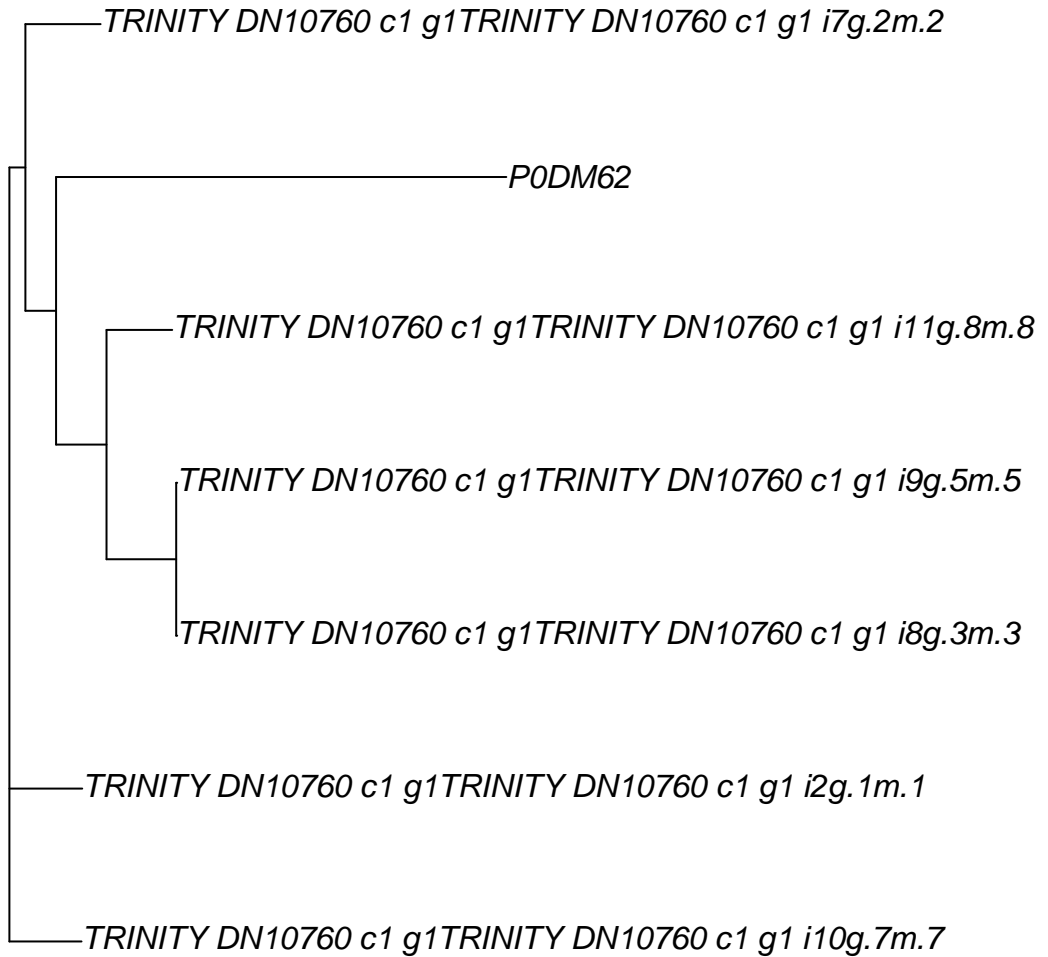

Supplement: S_F_1_C_sponsalis.tar.gz [file S_F_1_C_sponsalis.tar.gz]

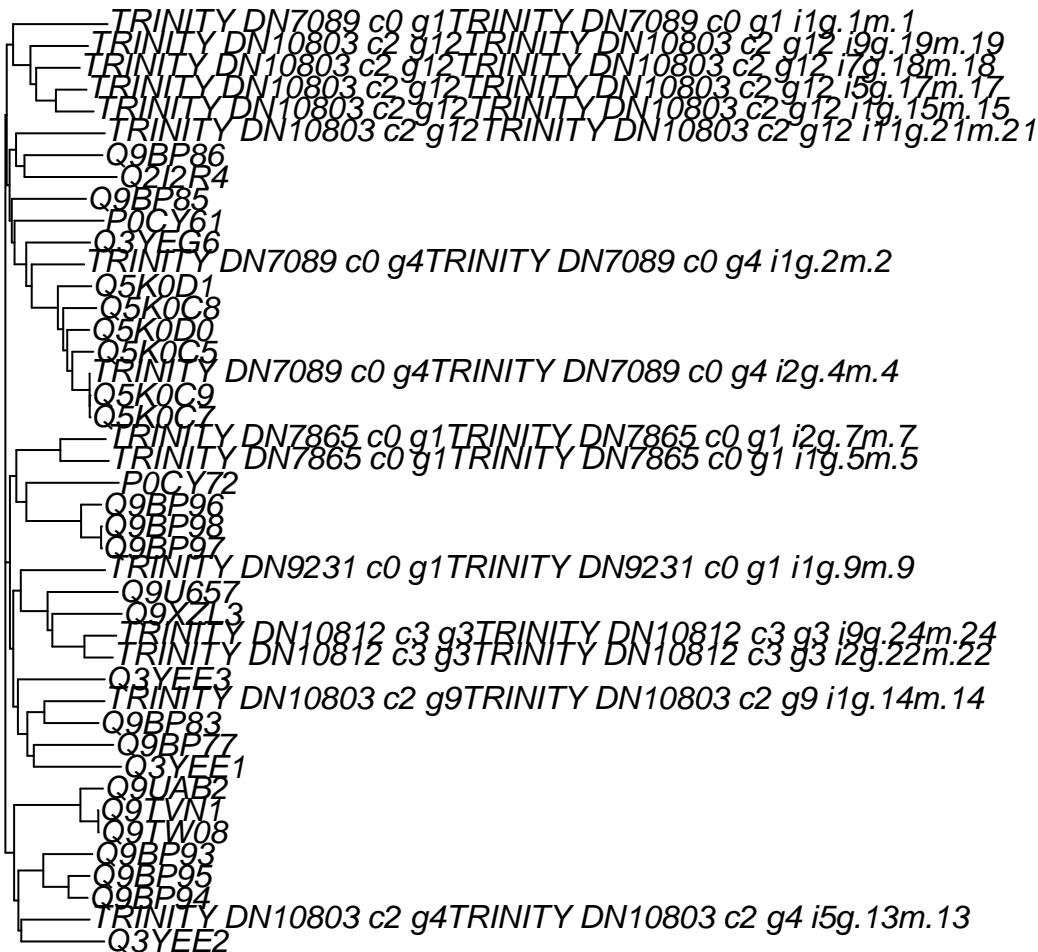

Supplement: S_F_1_C_sponsalis.tar.gz [file S_F_1_C_sponsalis.tar.gz]

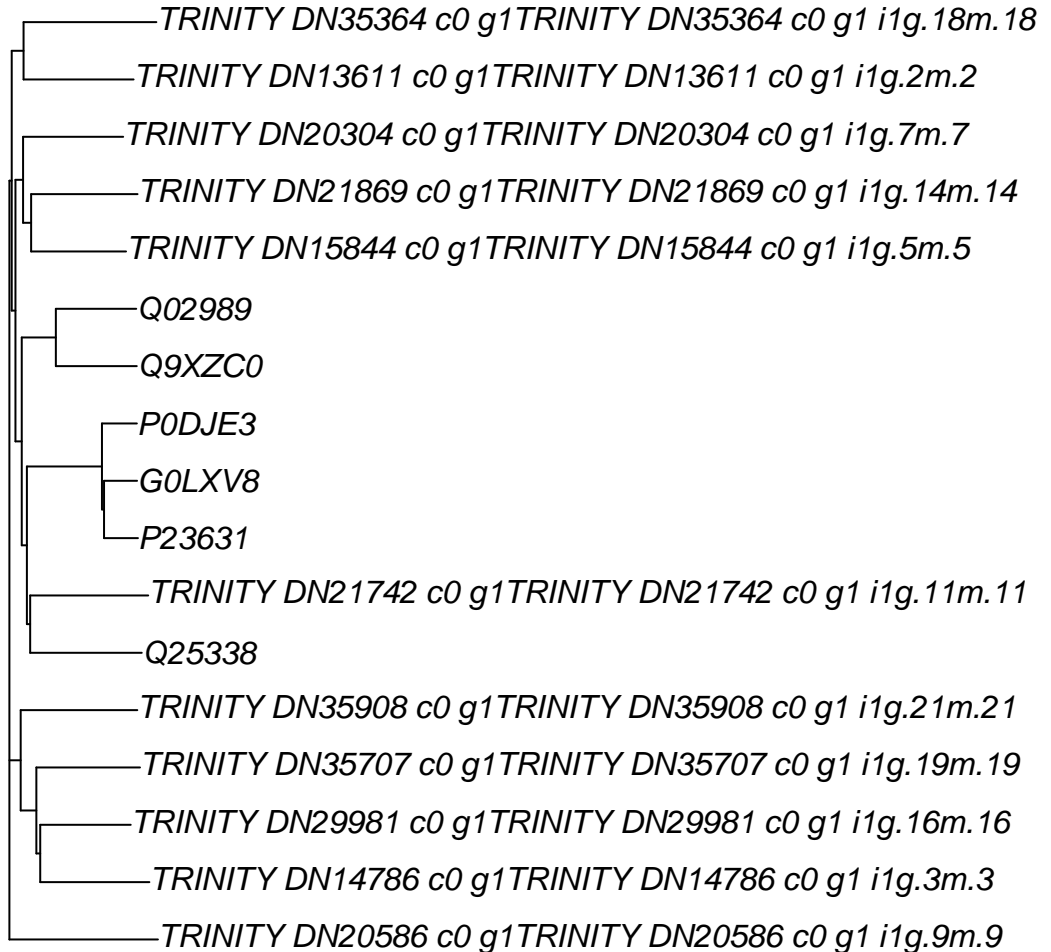

Supplement: S_F_1_C_sponsalis.tar.gz [file S_F_1_C_sponsalis.tar.gz]

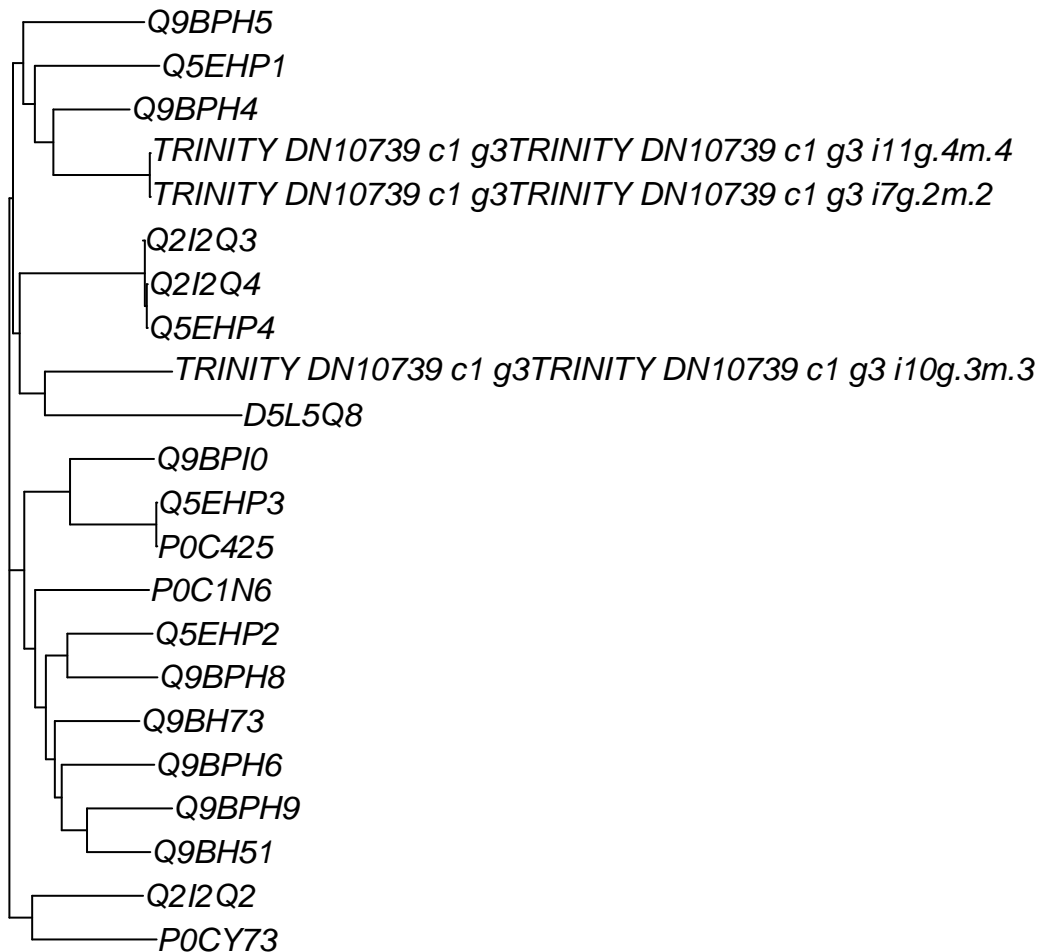

Supplement: S_F_1_C_sponsalis.tar.gz [file S_F_1_C_sponsalis.tar.gz]

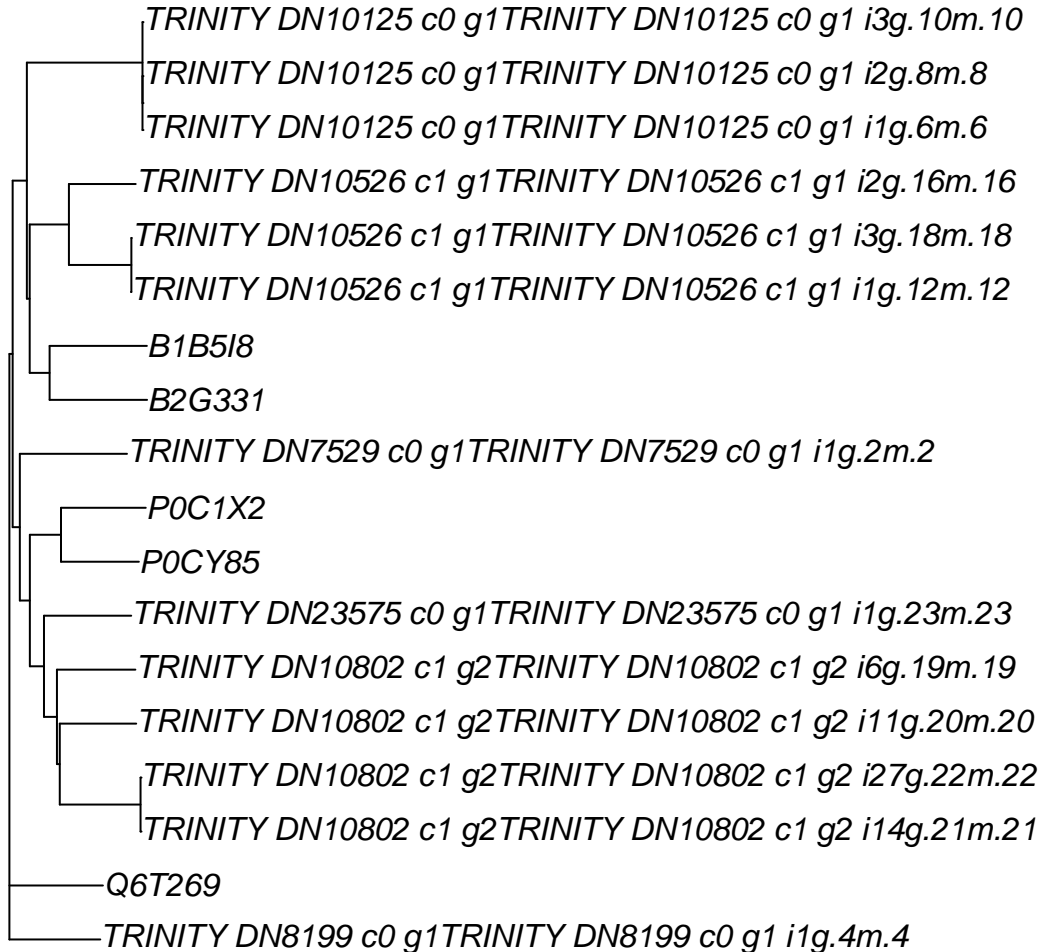

Supplement: S_F_1_C_sponsalis.tar.gz [file S_F_1_C_sponsalis.tar.gz]

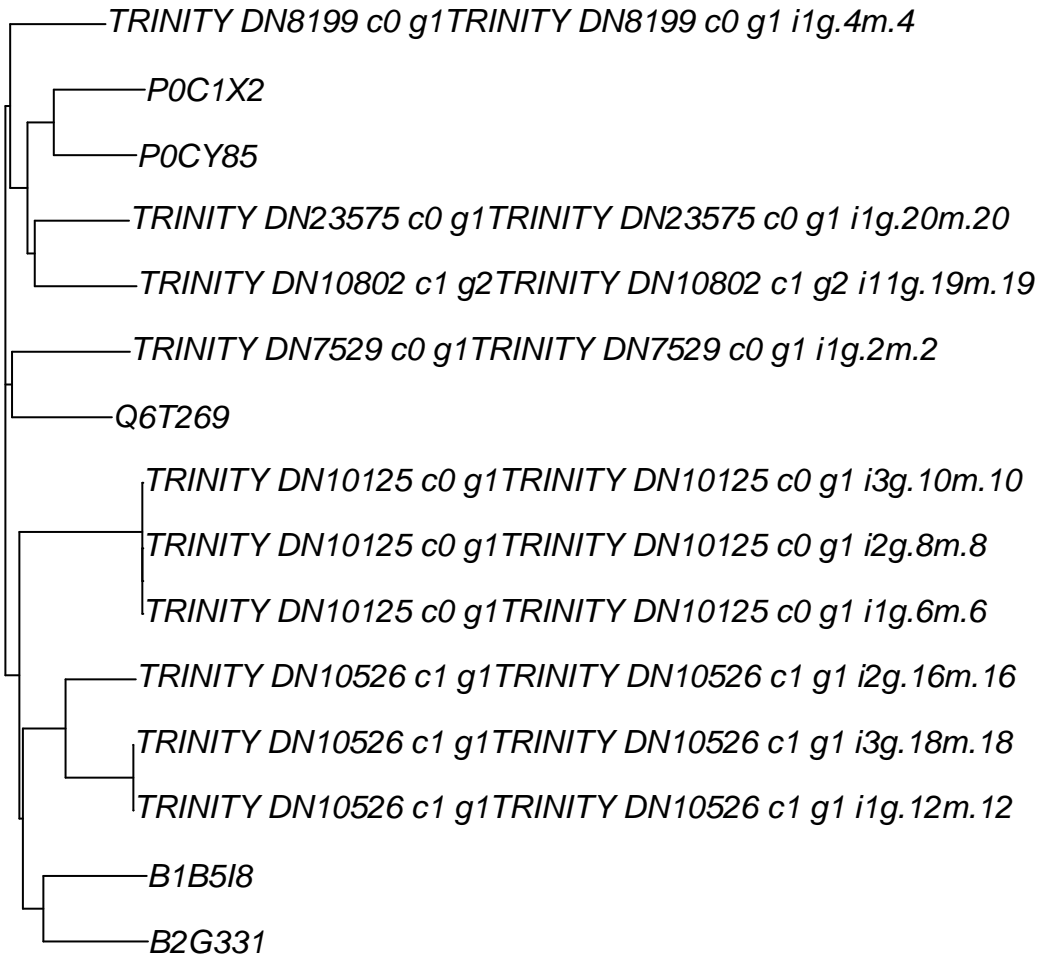

Supplement: S_F_1_C_sponsalis.tar.gz [file S_F_1_C_sponsalis.tar.gz]

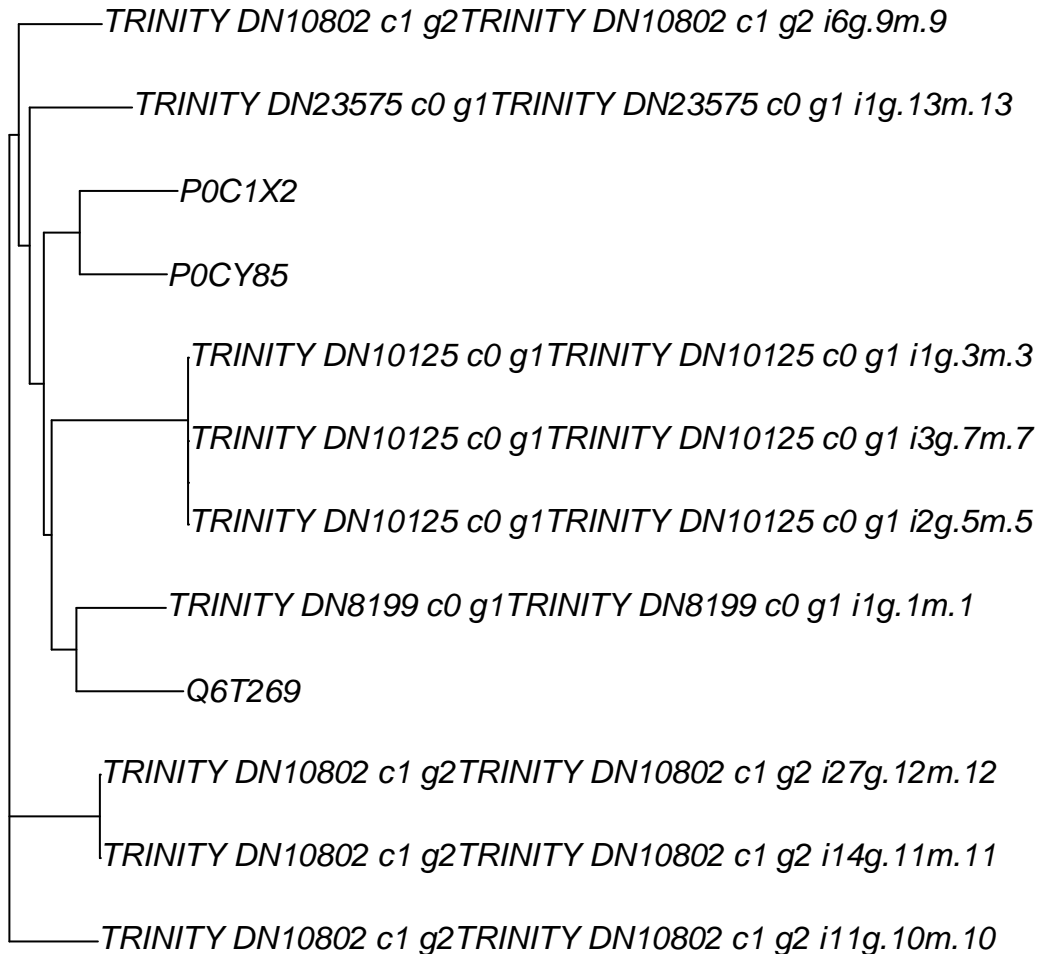

Supplement: S_F_1_C_sponsalis.tar.gz [file S_F_1_C_sponsalis.tar.gz]

*TRINITY DN10125 c0 g1 TRINITY DN10125 c0 g1 i1g.3m.3*

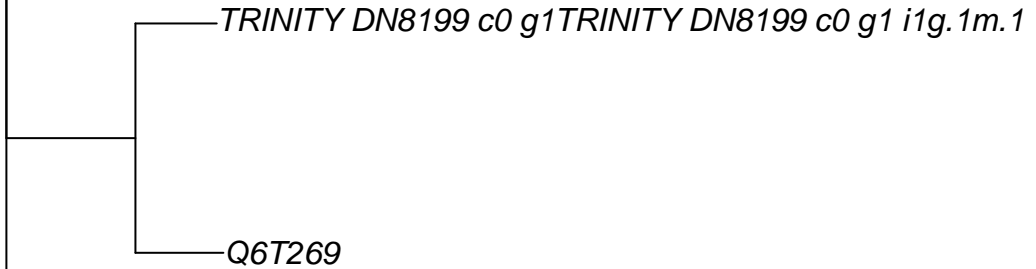

*TRINITY DN10125 c0 g1 TRINITY DN10125 c0 g1 i2g.5m.5*

*TRINITY DN10125 c0 g1 TRINITY DN10125 c0 g1 i3g.7m.7*

Supplement: S_F_1_C_sponsalis.tar.gz [file S_F_1_C_sponsalis.tar.gz]

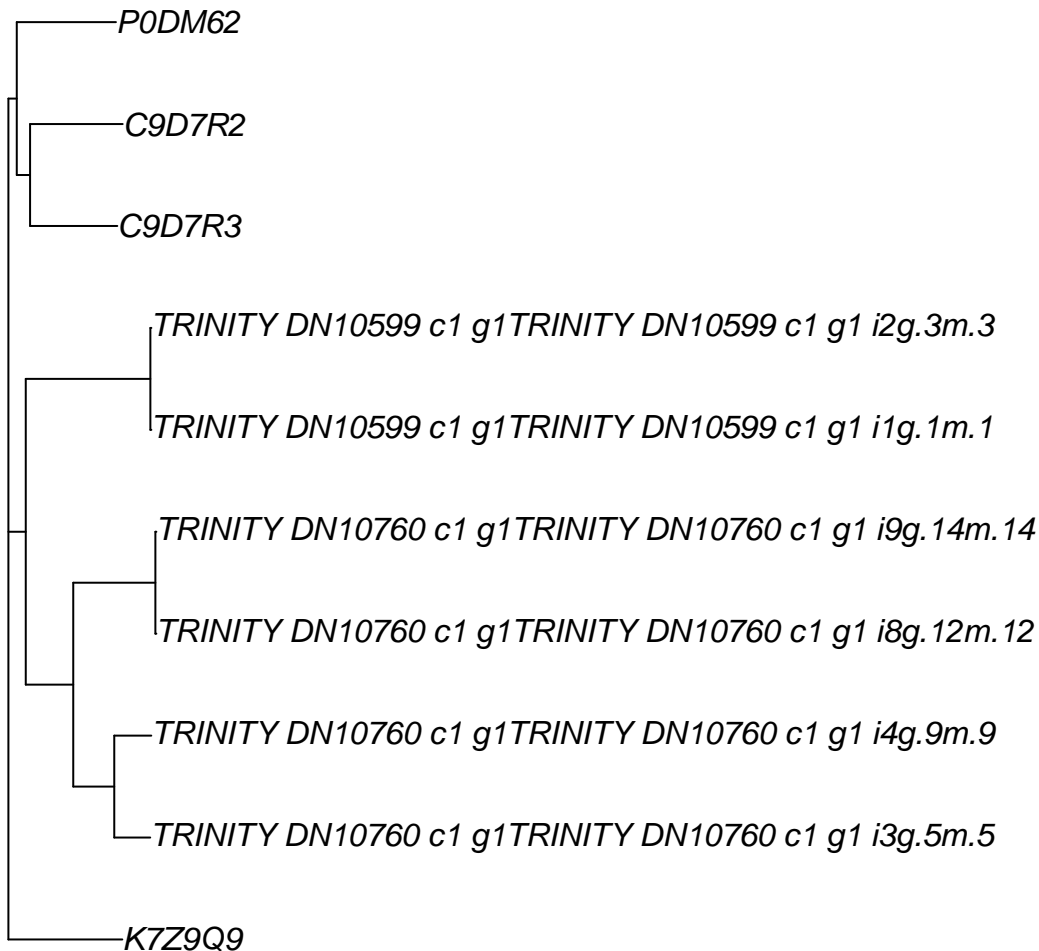

Supplement: S_F_1_C_sponsalis.tar.gz [file S_F_1_C_sponsalis.tar.gz]

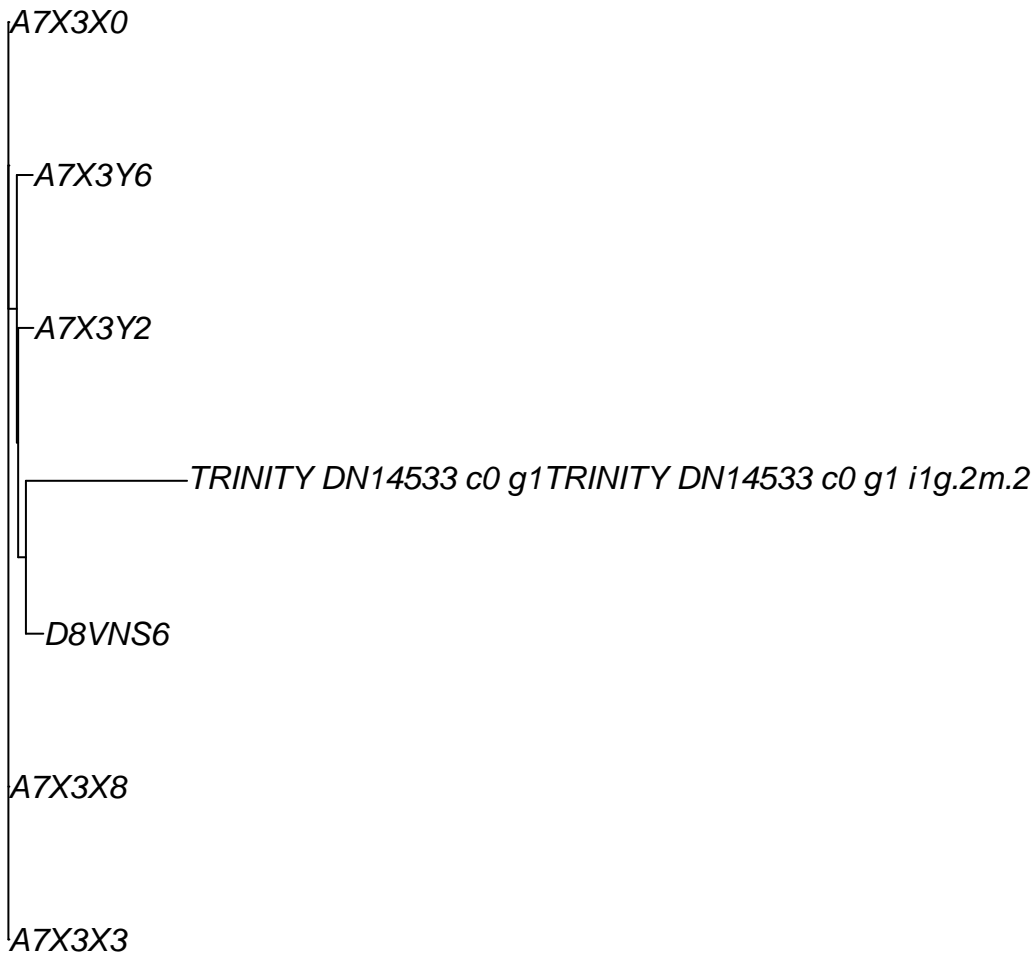

Supplement: S_F_1_C_sponsalis.tar.gz [file S_F_1_C_sponsalis.tar.gz]

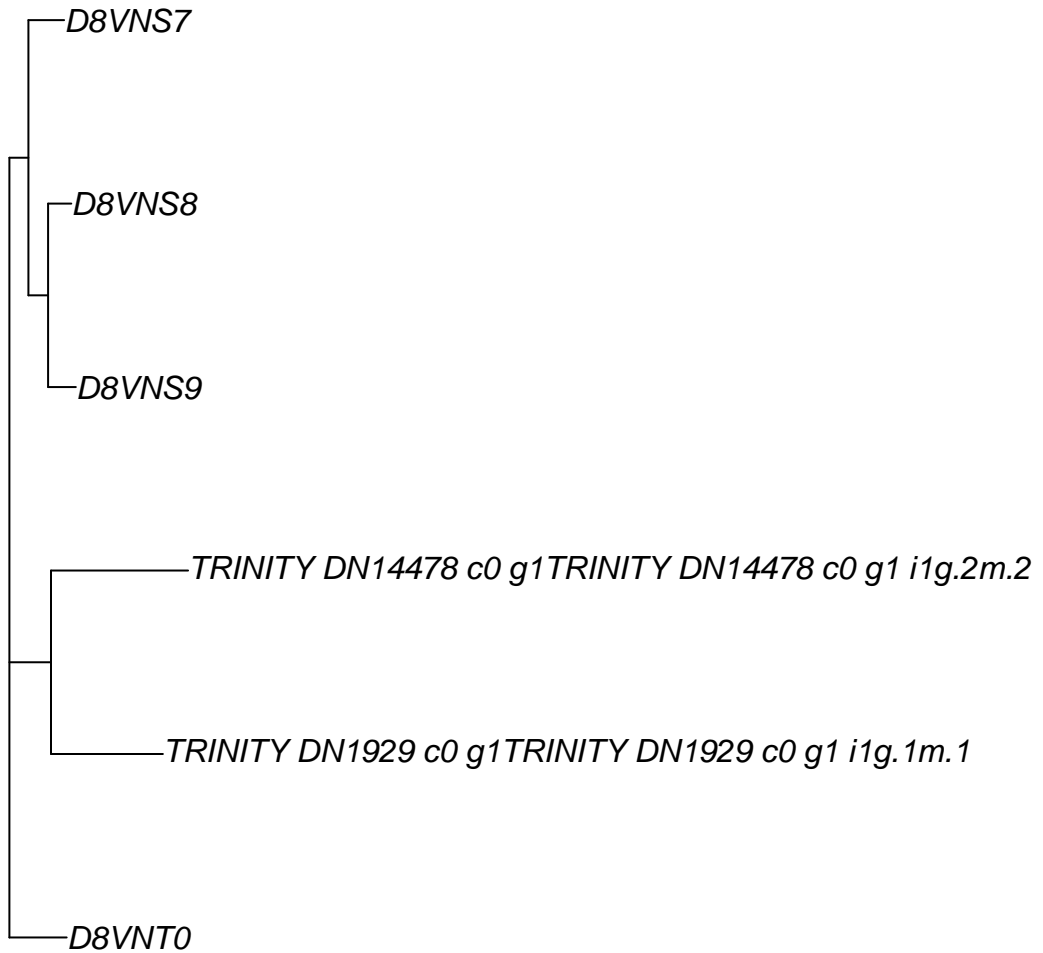

Supplement: S_F_1_C_sponsalis.tar.gz [file S_F_1_C_sponsalis.tar.gz]



Supplement: S_F_1_C_sponsalis.tar.gz [file S_F_1_C_sponsalis.tar.gz]

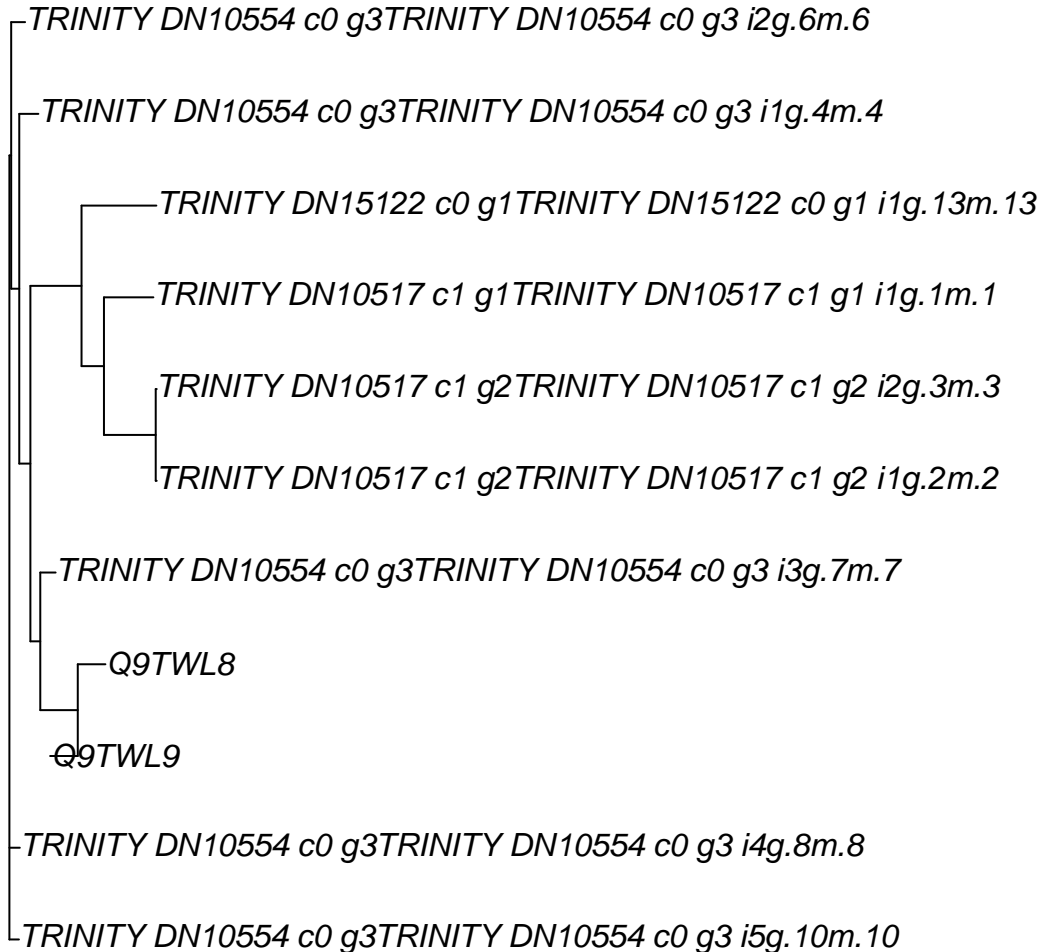

Supplement: S_F_1_C_sponsalis.tar.gz [file S_F_1_C_sponsalis.tar.gz]

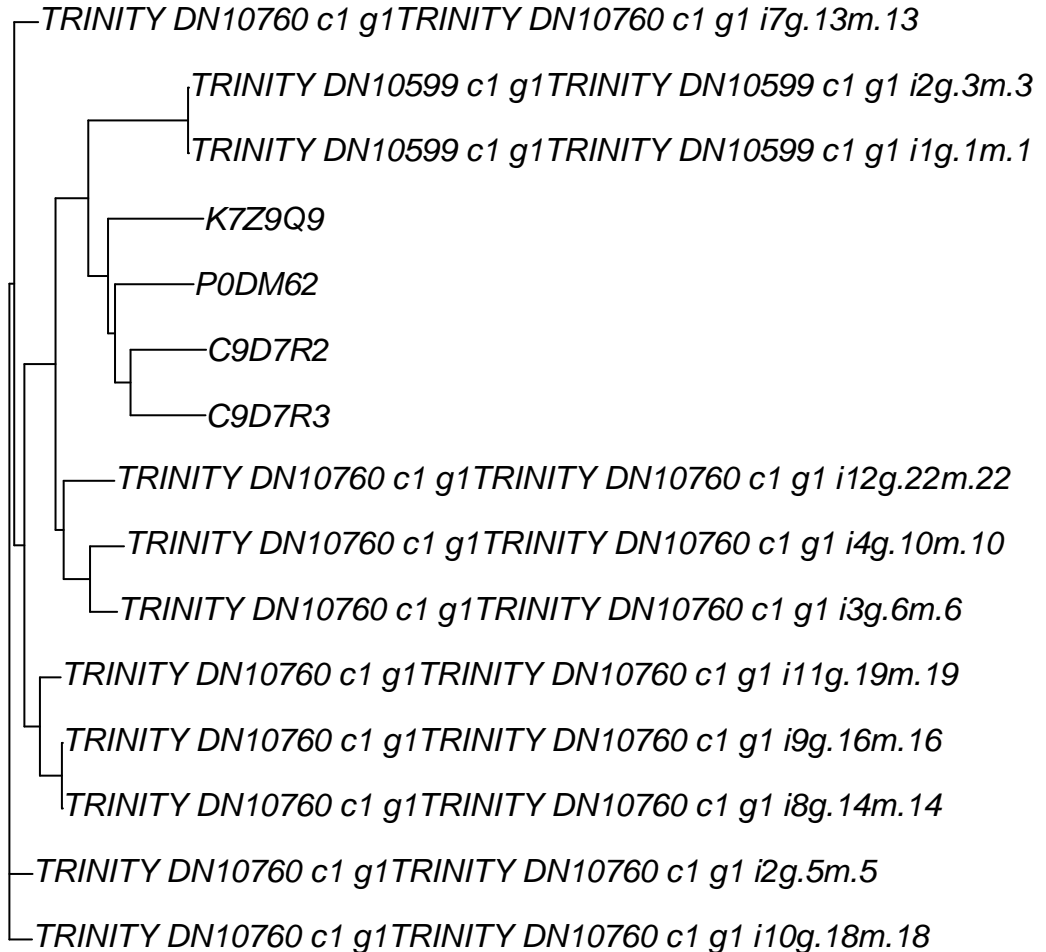

Supplement: S_F_1_C_sponsalis.tar.gz [file S_F_1_C_sponsalis.tar.gz]

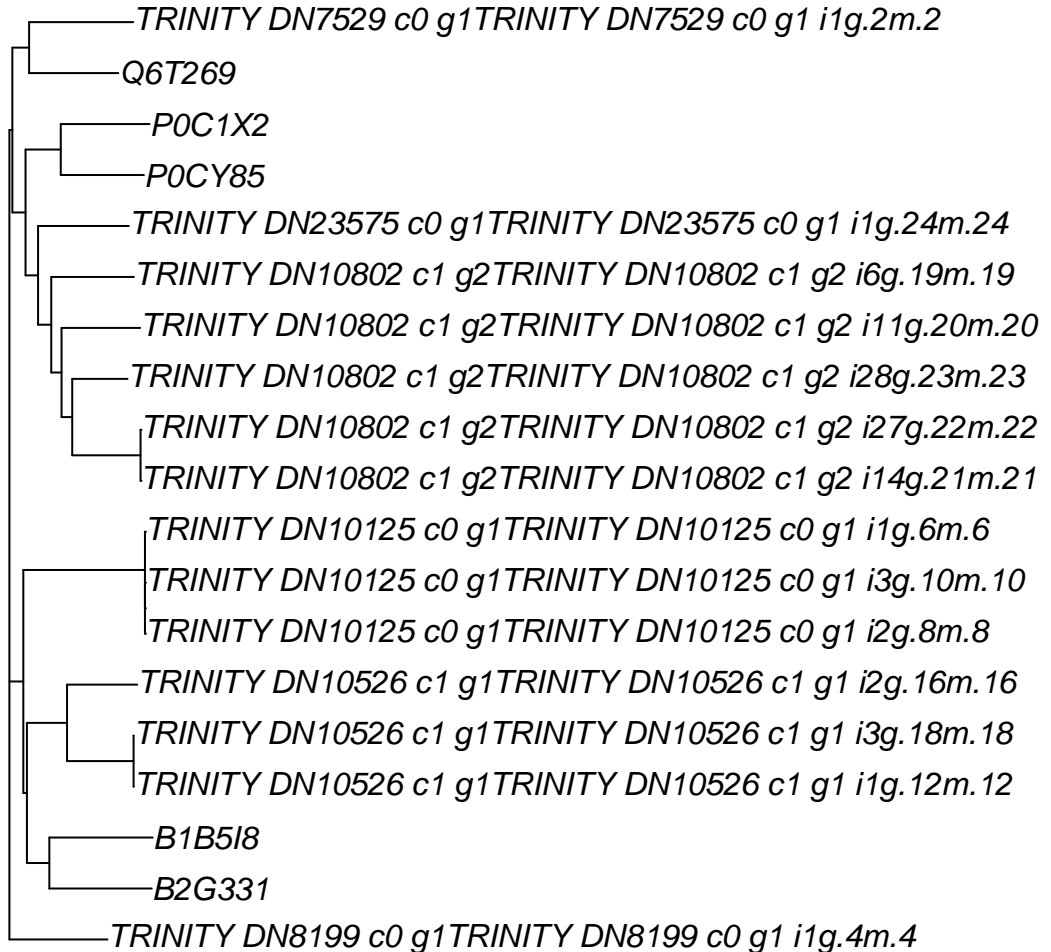

Supplement: S_F_1_C_sponsalis.tar.gz [file S_F_1_C_sponsalis.tar.gz]

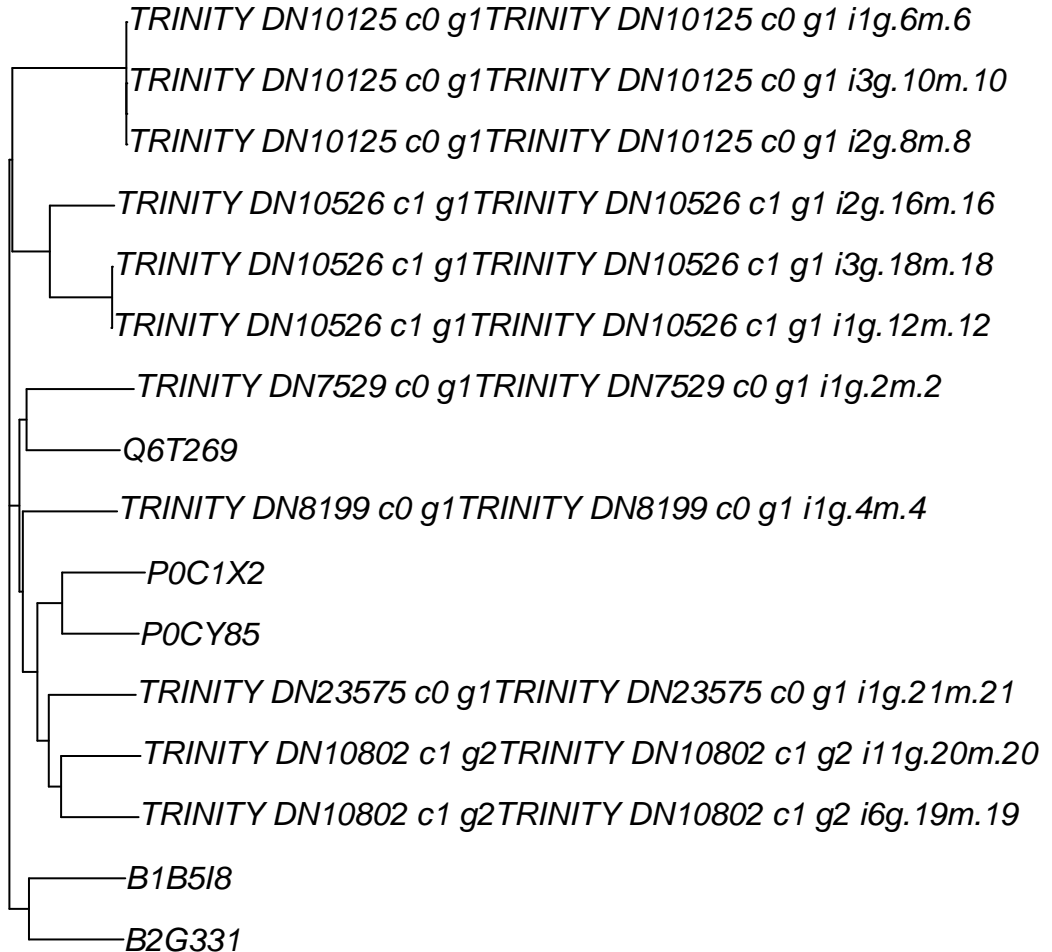

Supplement: S_F_1_C_sponsalis.tar.gz [file S_F_1_C_sponsalis.tar.gz]

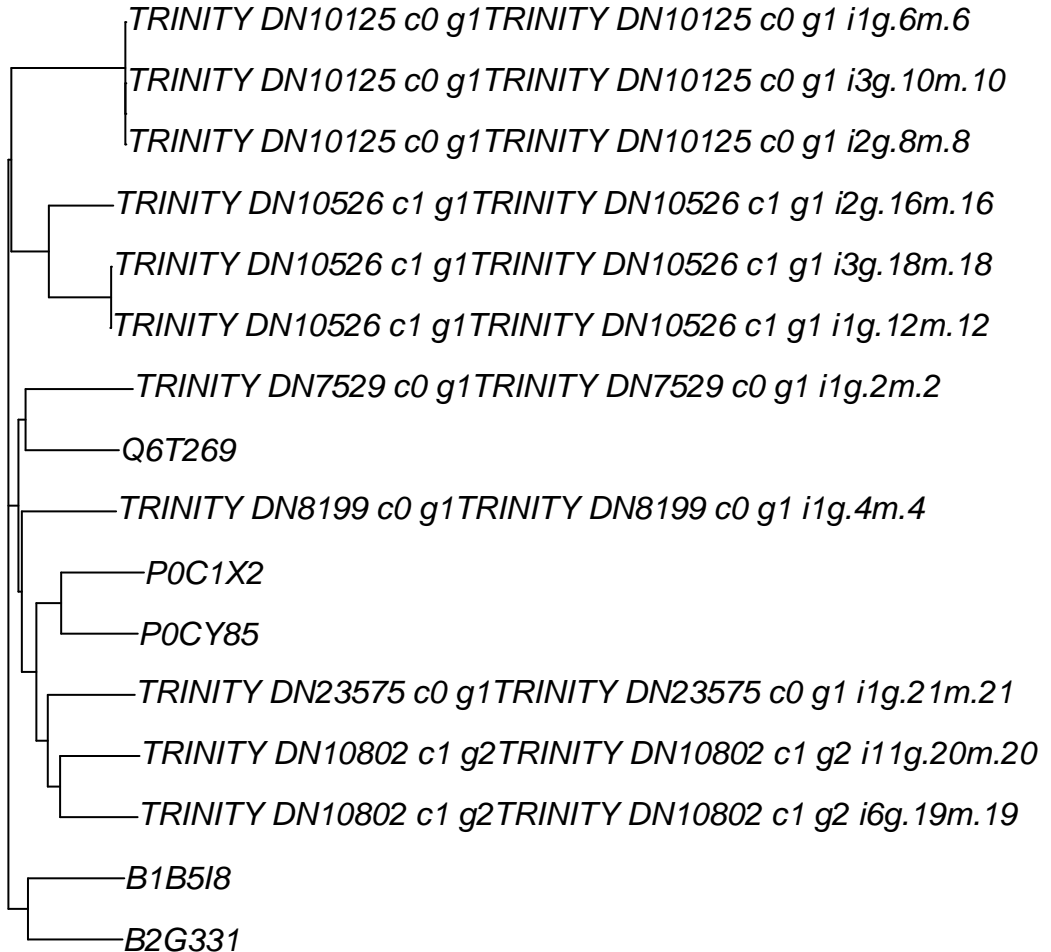

Supplement: S_F_1_C_sponsalis.tar.gz [file S_F_1_C_sponsalis.tar.gz]

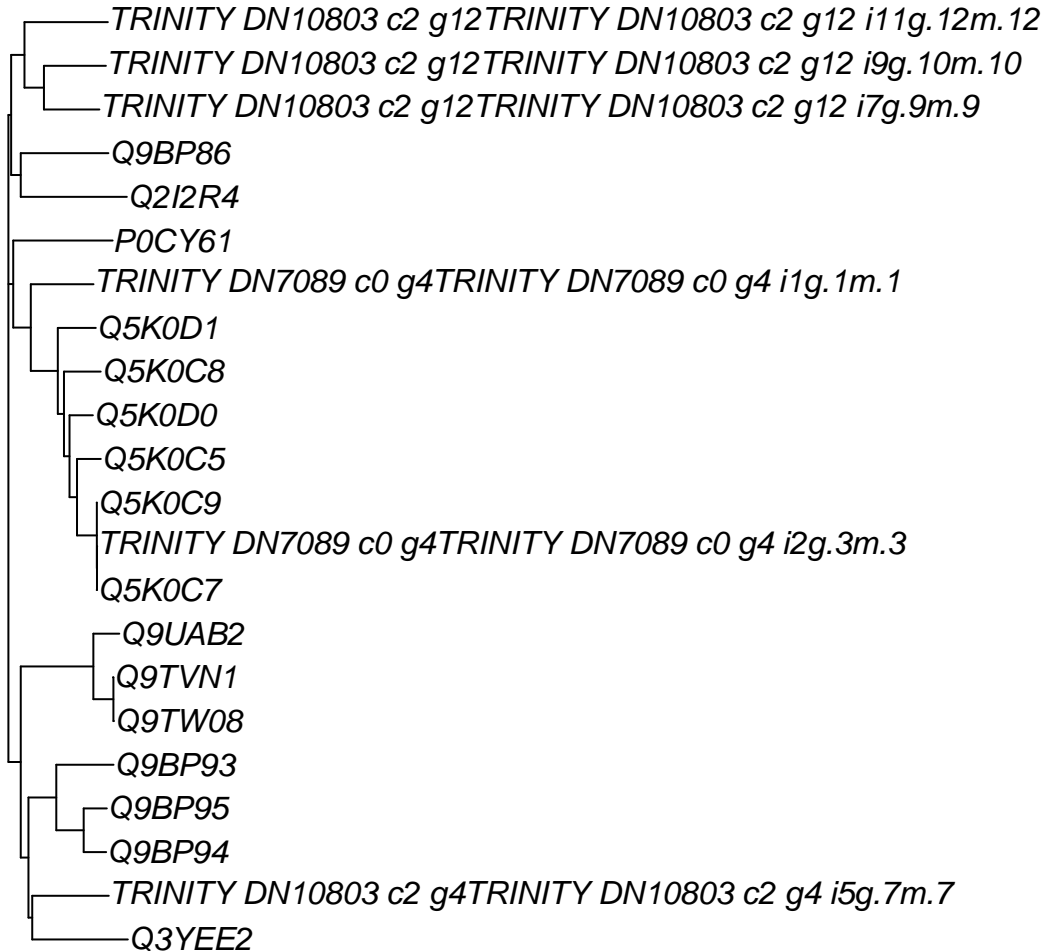

Supplement: S_F_1_C_sponsalis.tar.gz [file S_F_1_C_sponsalis.tar.gz]

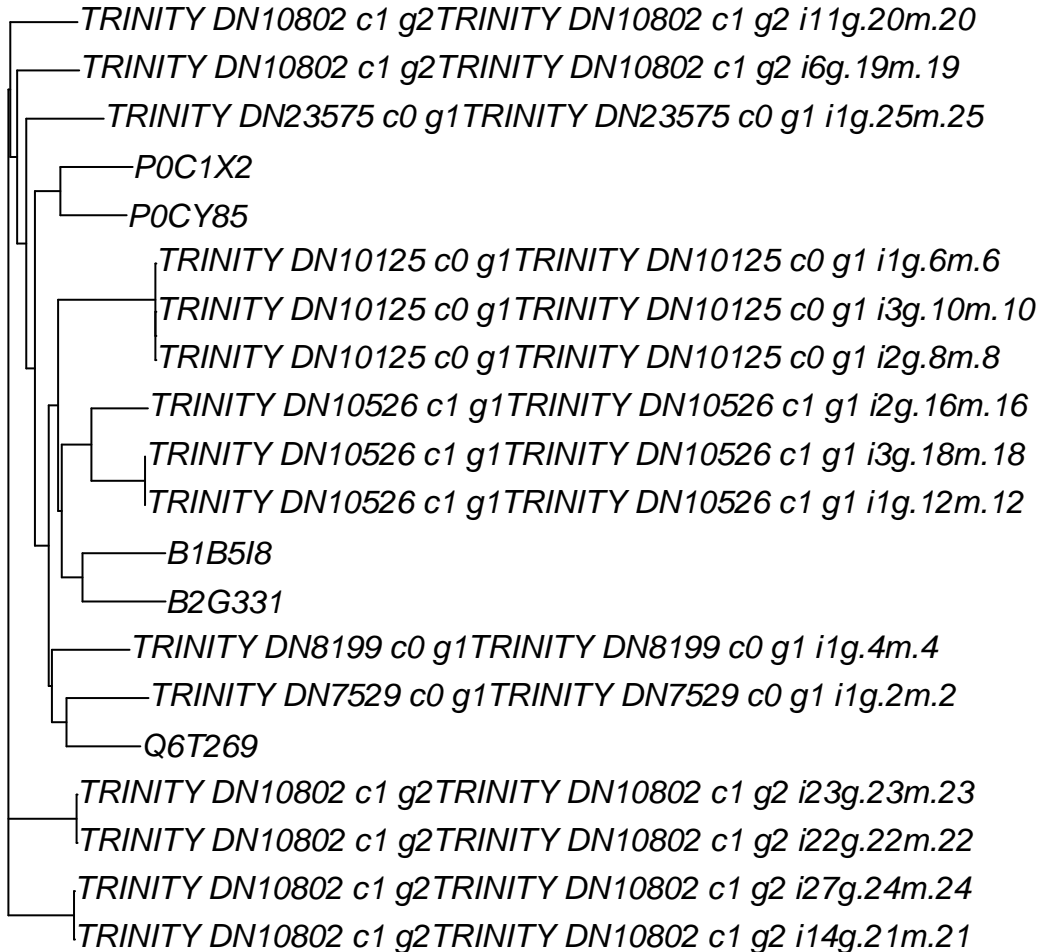

Supplement: S_F_1_C_sponsalis.tar.gz [file S_F_1_C_sponsalis.tar.gz]

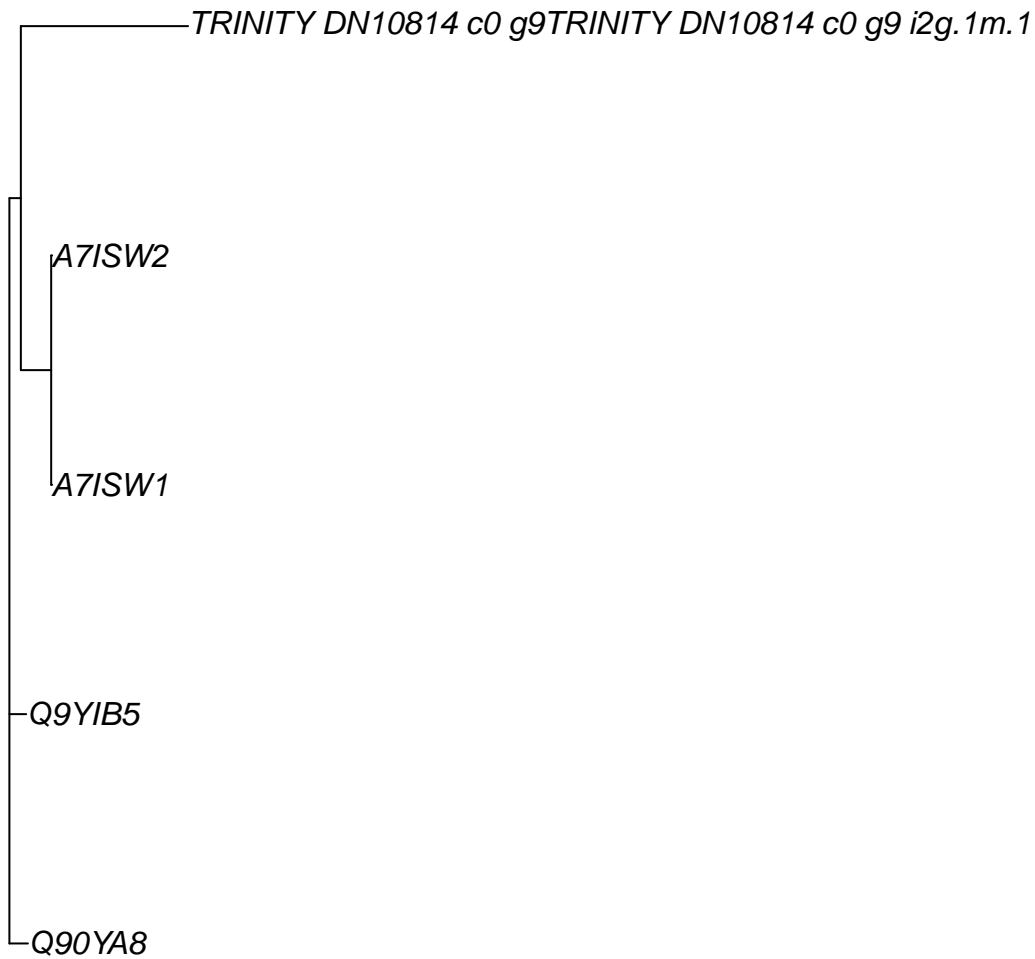

Supplement: S_F_1_C_sponsalis.tar.gz [file S_F_1_C_sponsalis.tar.gz]

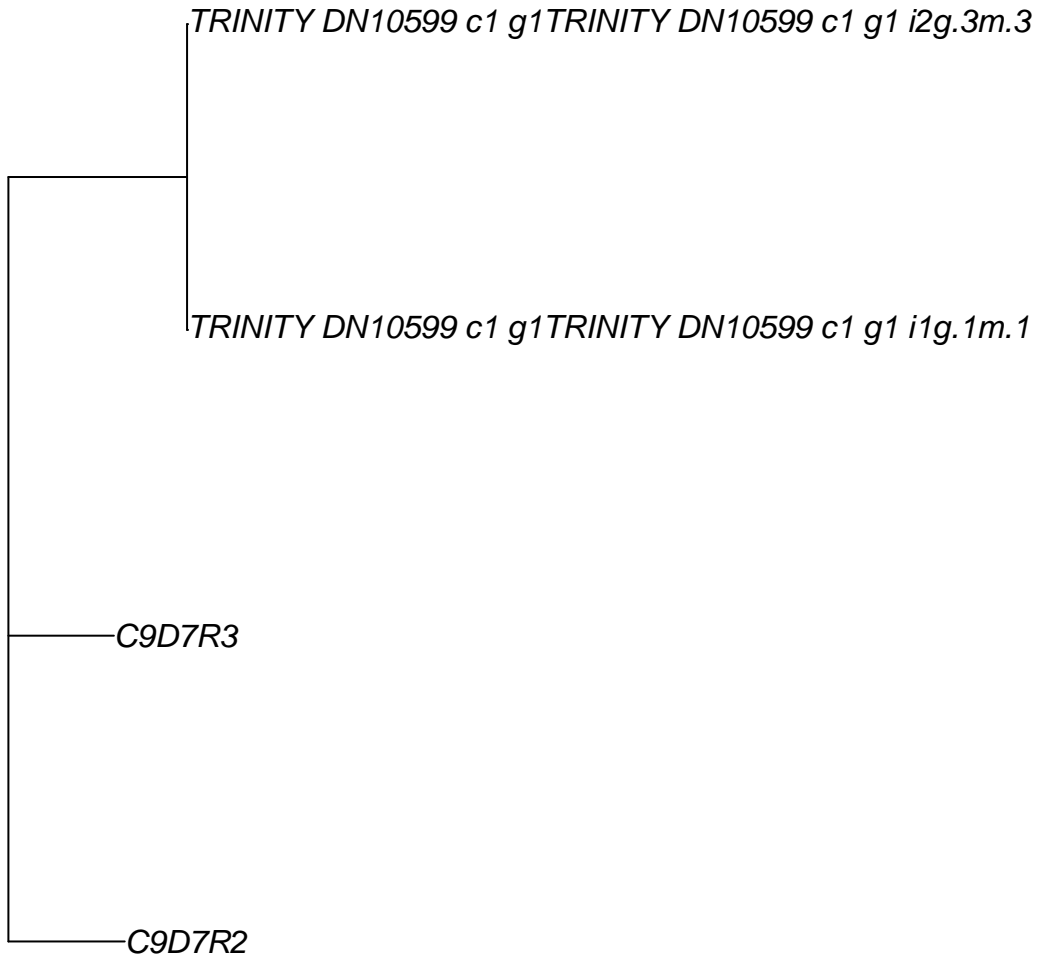

Supplement: S_F_1_C_sponsalis.tar.gz [file S_F_1_C_sponsalis.tar.gz]

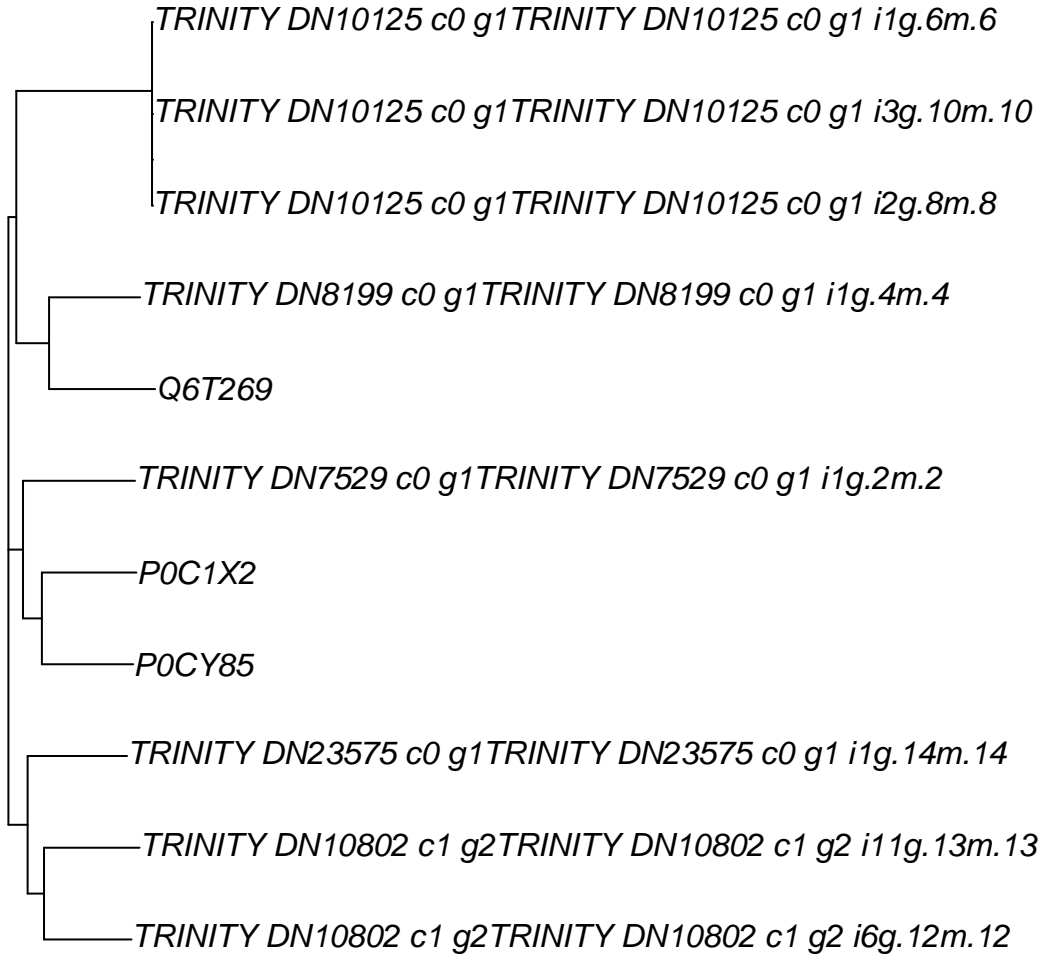

Supplement: S_F_1_C_sponsalis.tar.gz [file S_F_1_C_sponsalis.tar.gz]



Supplement: S_F_1_C_sponsalis.tar.gz [file S_F_1_C_sponsalis.tar.gz]



Supplement: S_F_1_C_sponsalis.tar.gz [file S_F_1_C_sponsalis.tar.gz]

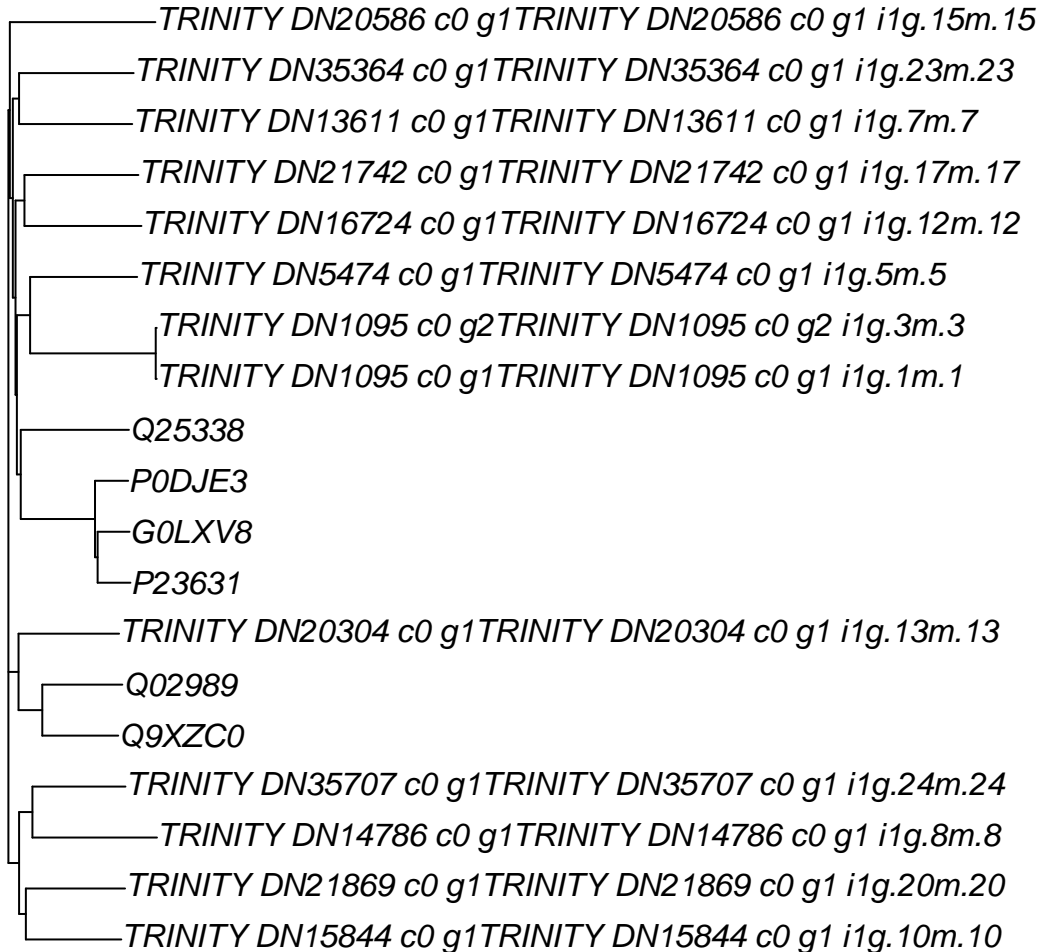

Supplement: S_F_1_C_sponsalis.tar.gz [file S_F_1_C_sponsalis.tar.gz]

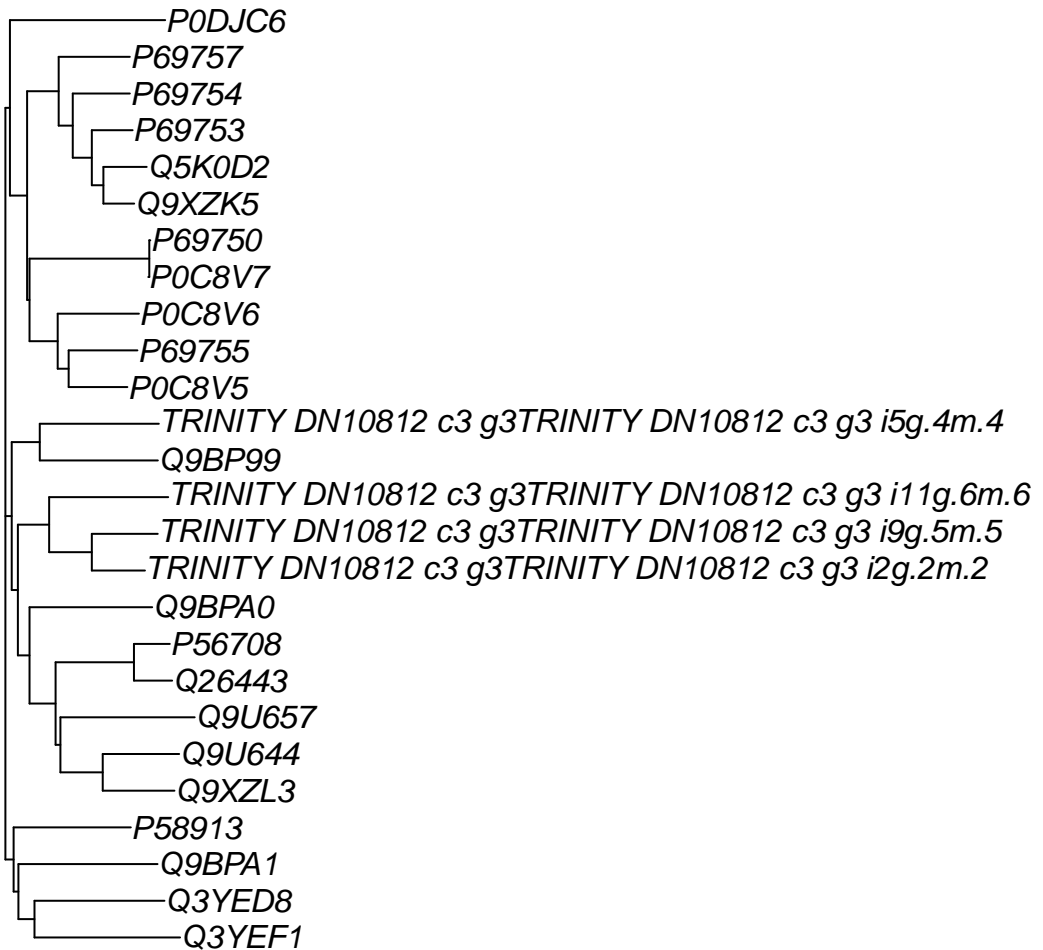

Supplement: S_F_1_C_sponsalis.tar.gz [file S_F_1_C_sponsalis.tar.gz]

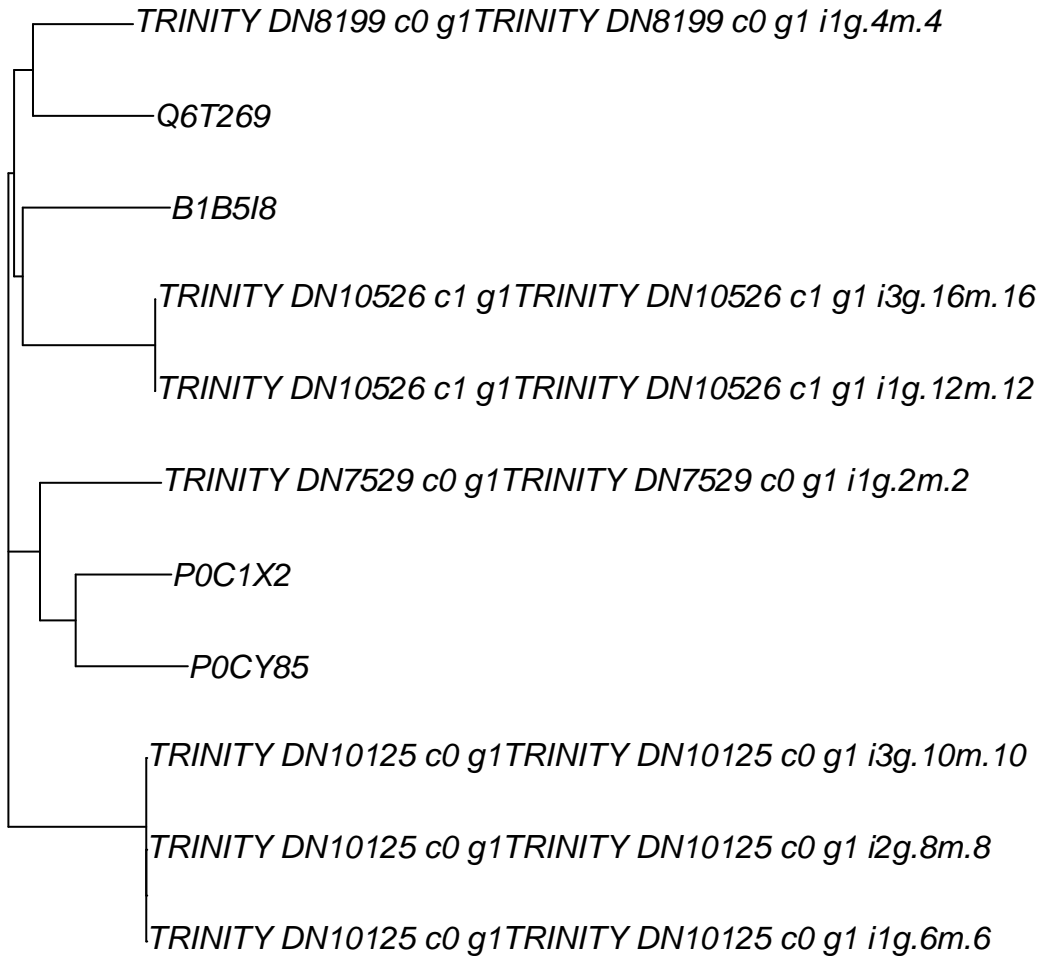

Supplement: S_F_1_C_sponsalis.tar.gz [file S_F_1_C_sponsalis.tar.gz]

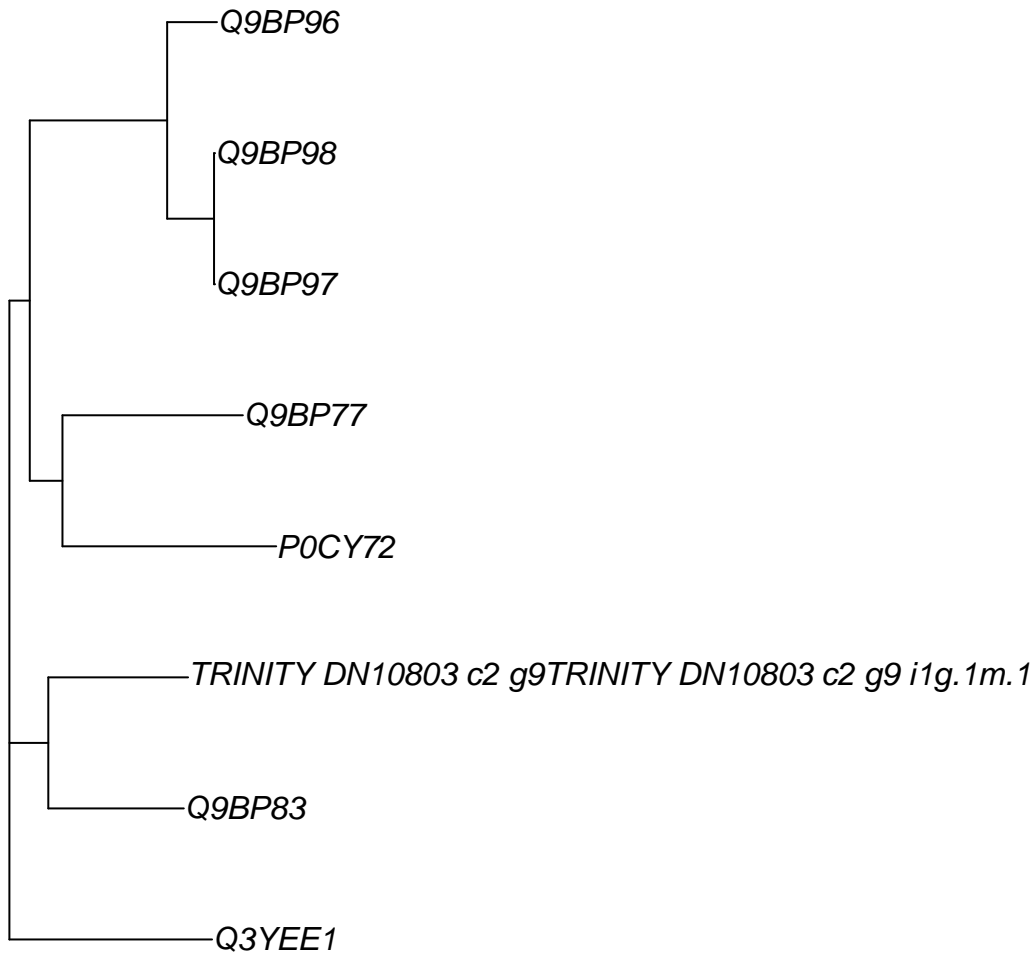

Supplement: S_F_1_C_sponsalis.tar.gz [file S_F_1_C_sponsalis.tar.gz]

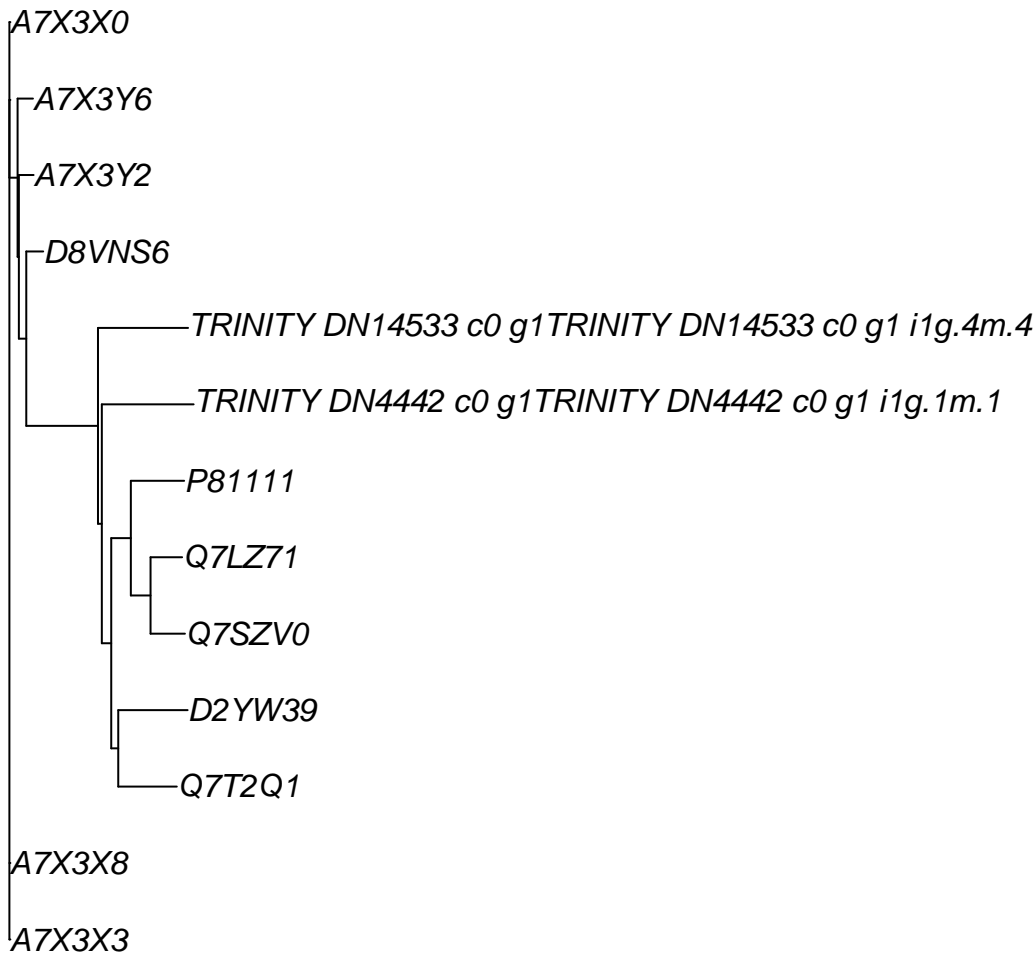

Supplement: S_F_1_C_sponsalis.tar.gz [file S_F_1_C_sponsalis.tar.gz]

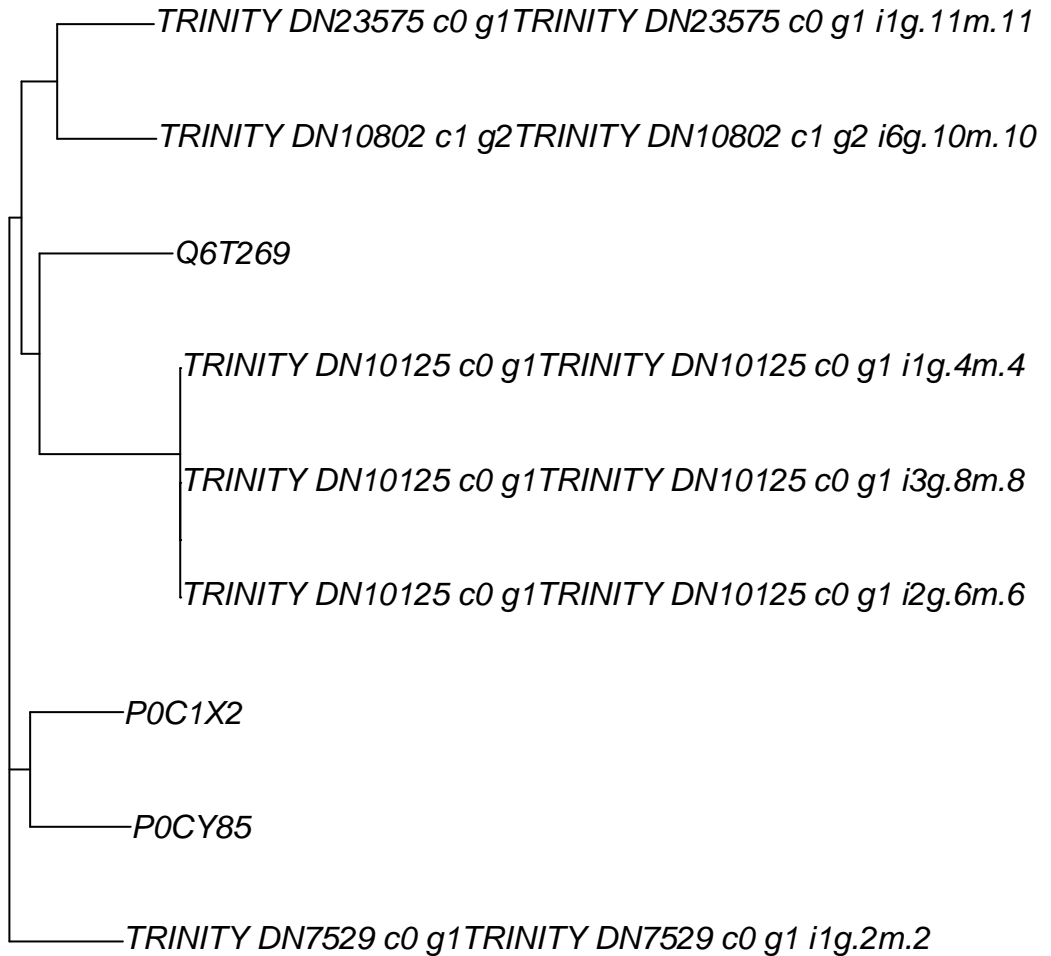

Supplement: S_F_1_C_sponsalis.tar.gz [file S_F_1_C_sponsalis.tar.gz]

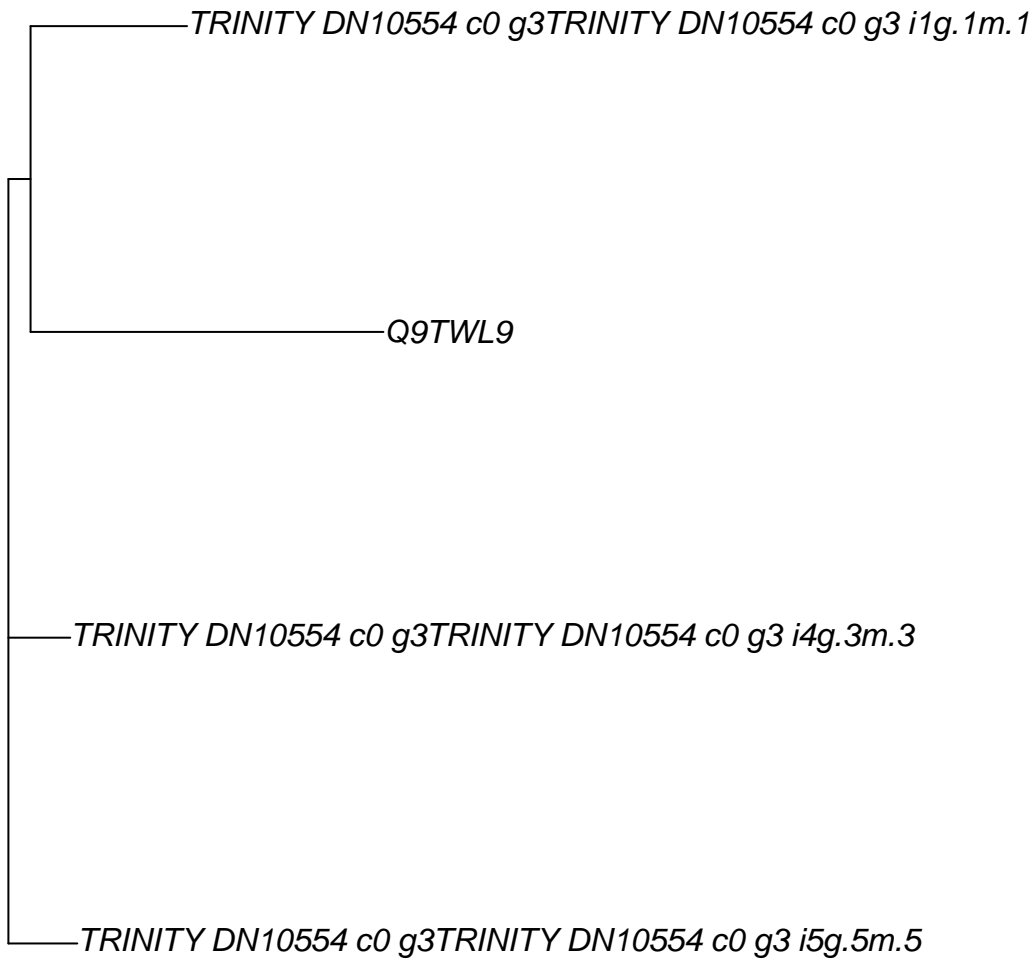

Supplement: S_F_1_C_sponsalis.tar.gz [file S_F_1_C_sponsalis.tar.gz]

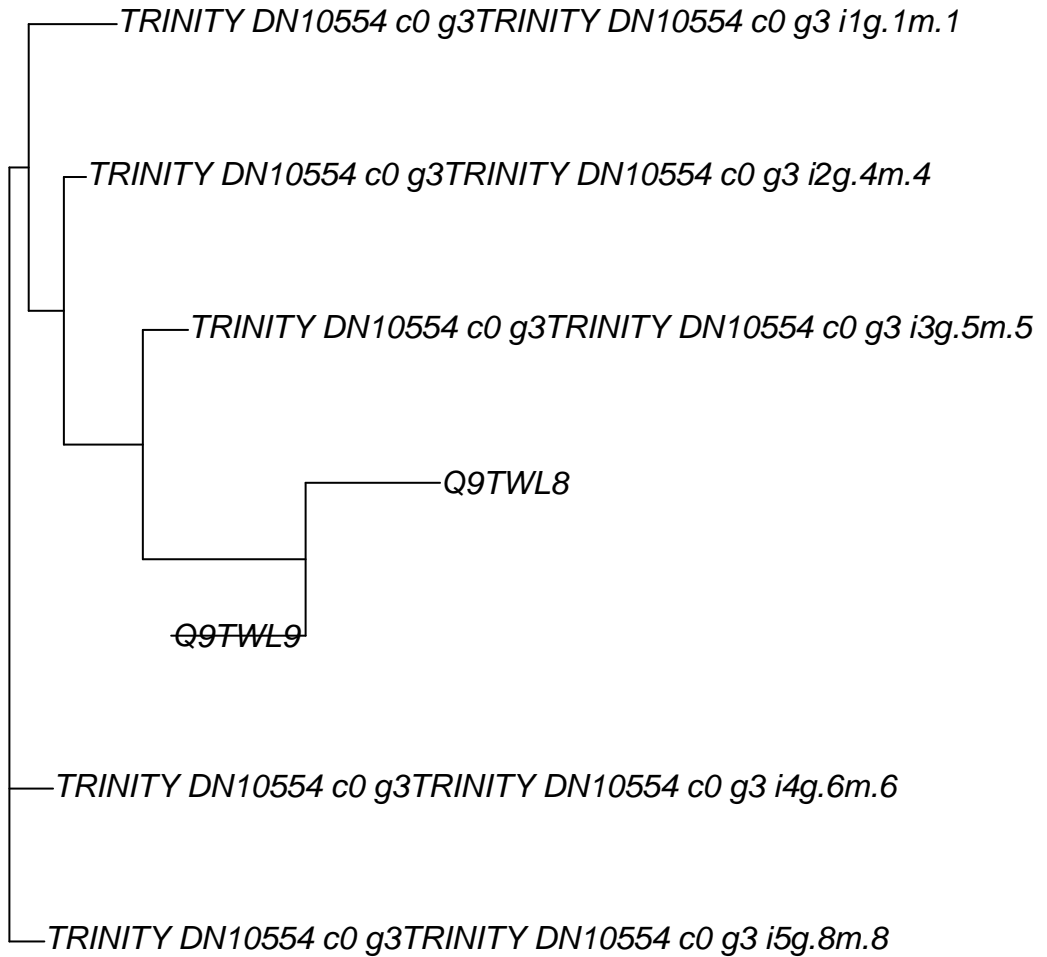

Supplement: S_F_1_C_sponsalis.tar.gz [file S_F_1_C_sponsalis.tar.gz]

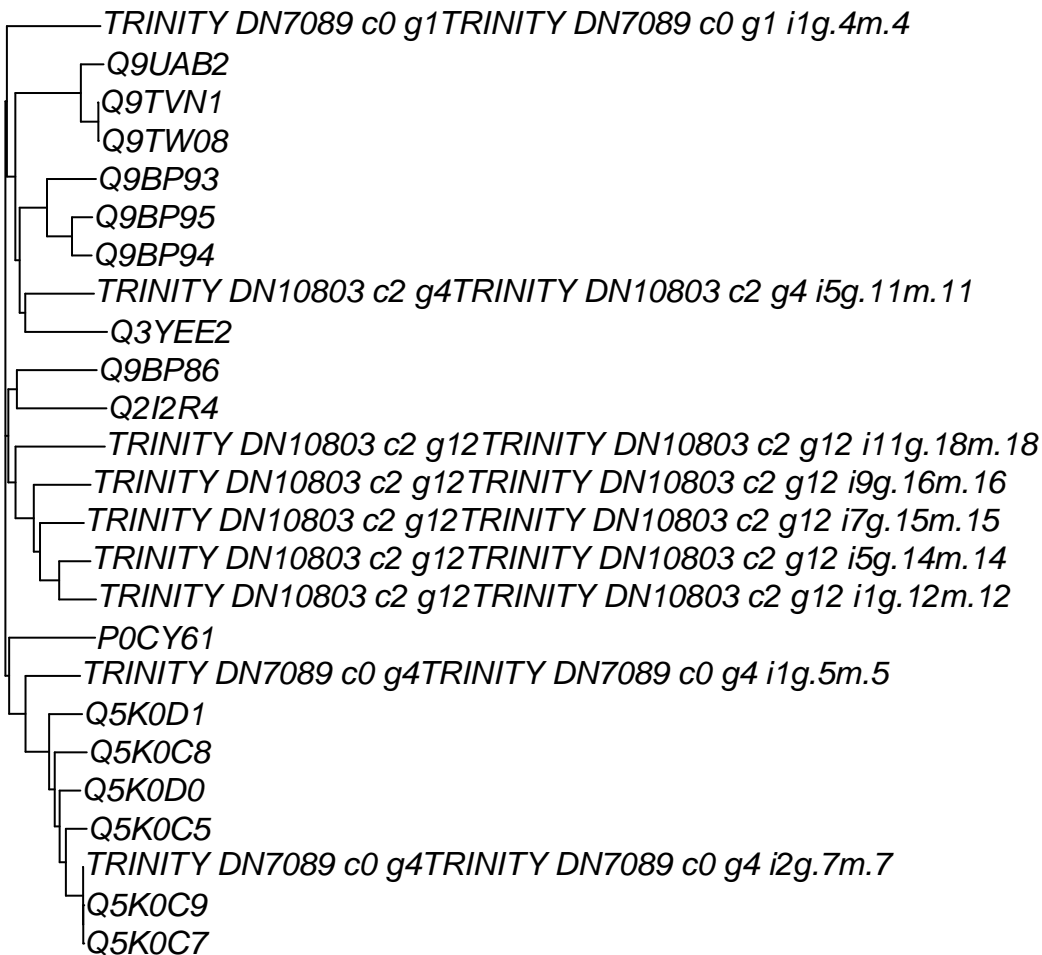

Supplement: S_F_1_C_sponsalis.tar.gz [file S_F_1_C_sponsalis.tar.gz]

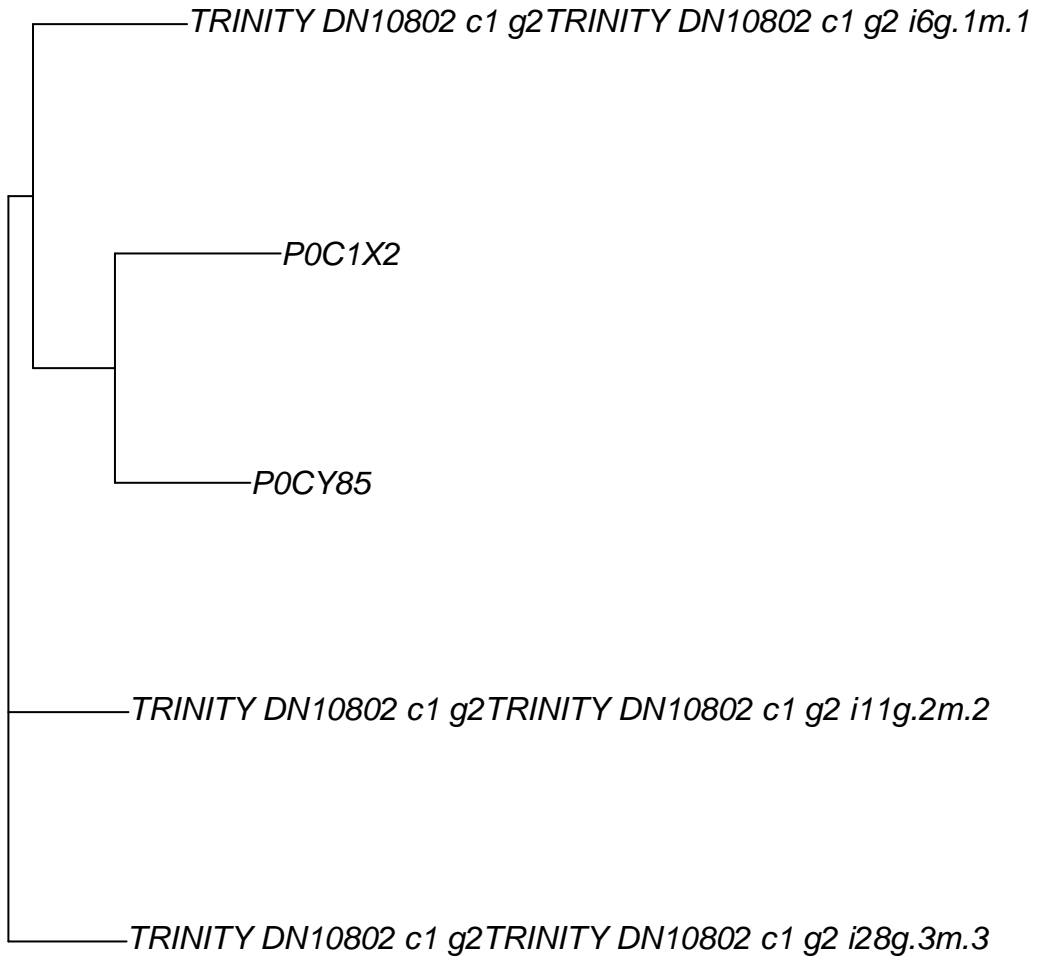

Supplement: S_F_1_C_sponsalis.tar.gz [file S_F_1_C_sponsalis.tar.gz]



Supplement: S_F_1_C_sponsalis.tar.gz [file S_F_1_C_sponsalis.tar.gz]

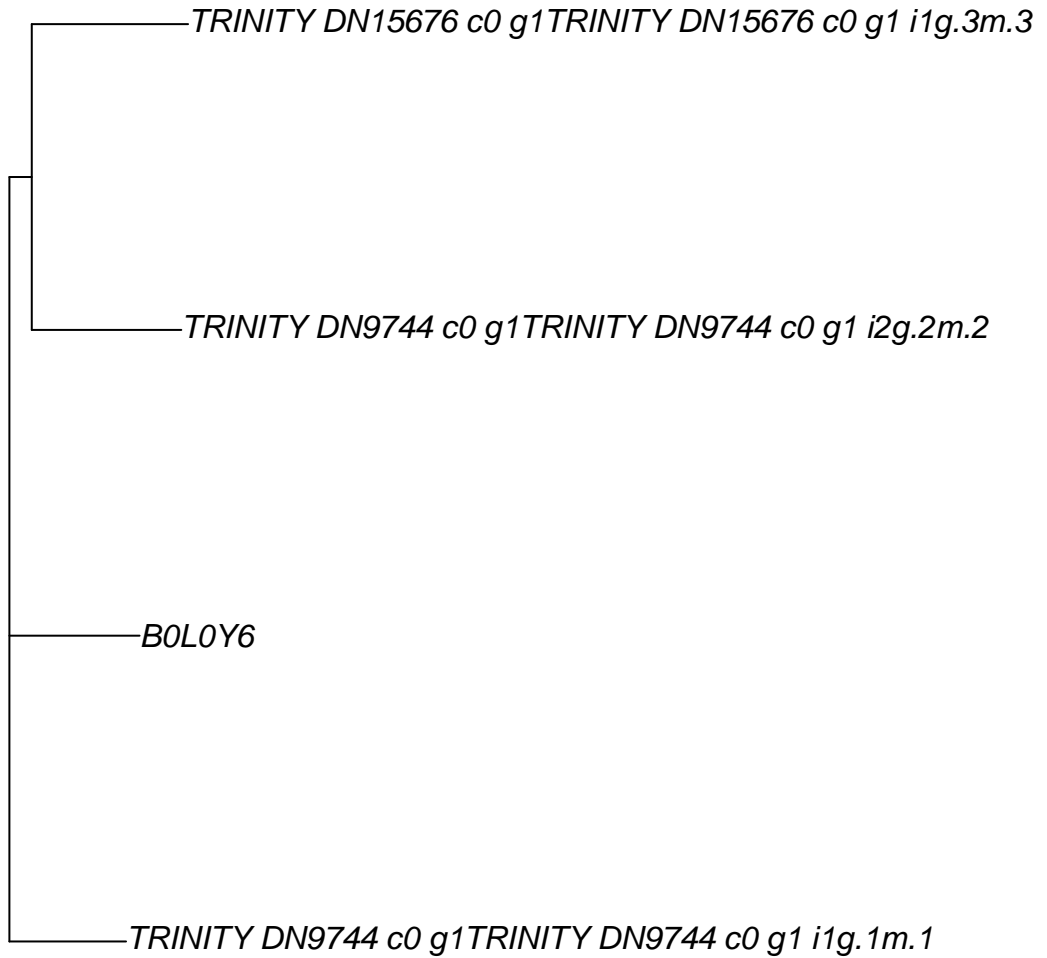

Supplement: S_F_1_C_sponsalis.tar.gz [file S_F_1_C_sponsalis.tar.gz]

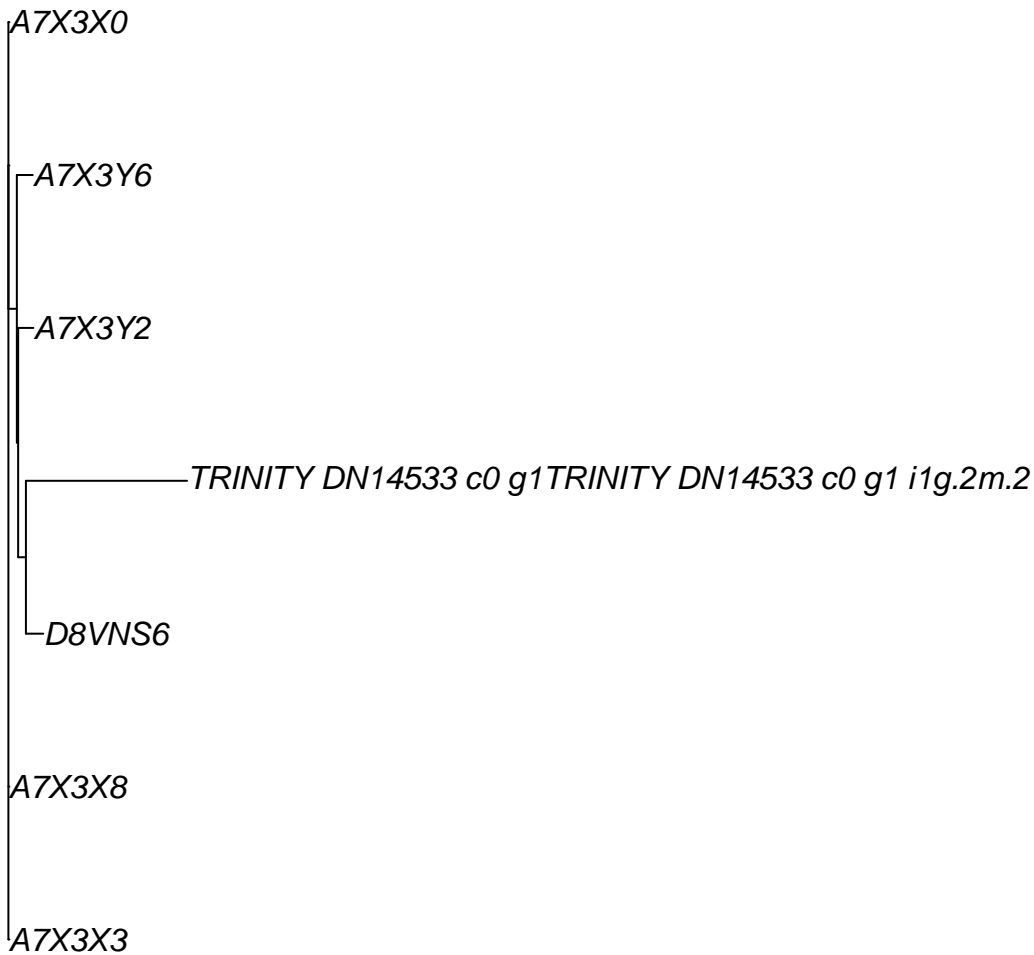

Supplement: S_F_1_C_sponsalis.tar.gz [file S_F_1_C_sponsalis.tar.gz]

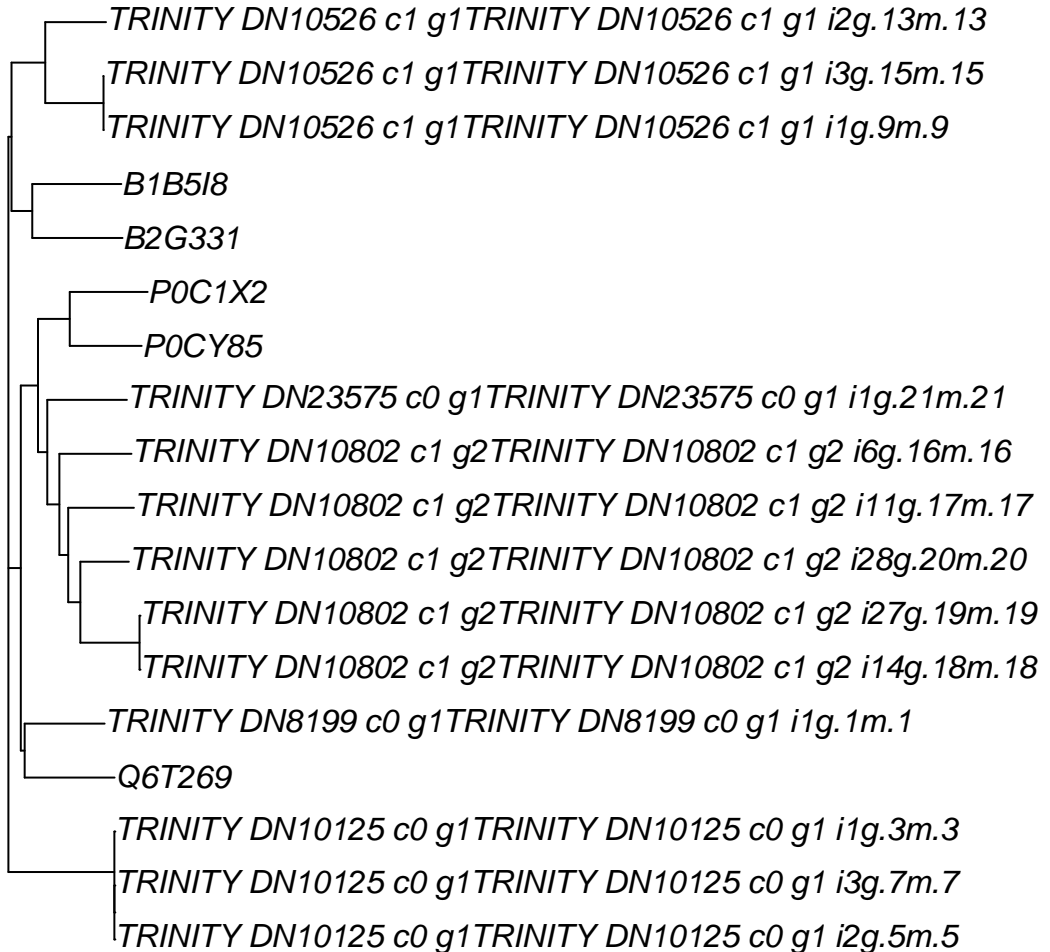

Supplement: S_F_1_C_sponsalis.tar.gz [file S_F_1_C_sponsalis.tar.gz]

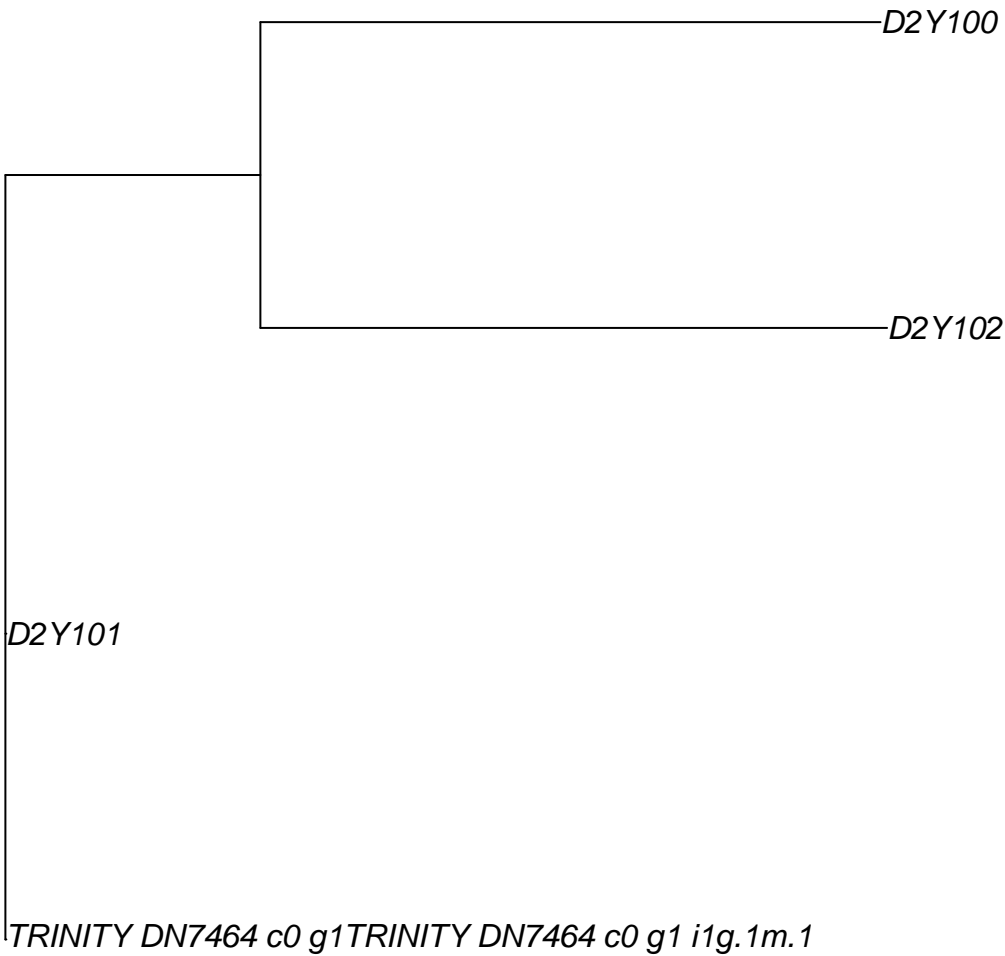

Supplement: S_F_1_C_sponsalis.tar.gz [file S_F_1_C_sponsalis.tar.gz]

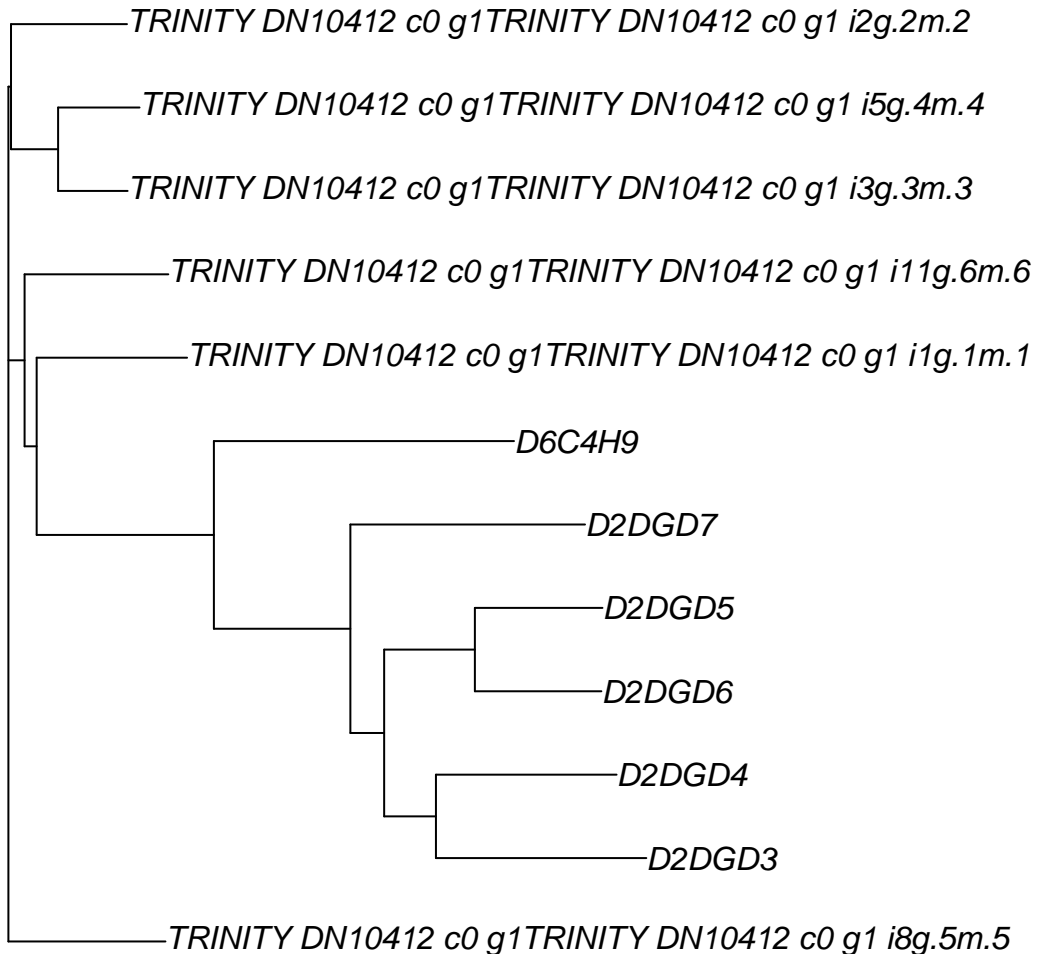

Supplement: S_F_1_C_sponsalis.tar.gz [file S_F_1_C_sponsalis.tar.gz]

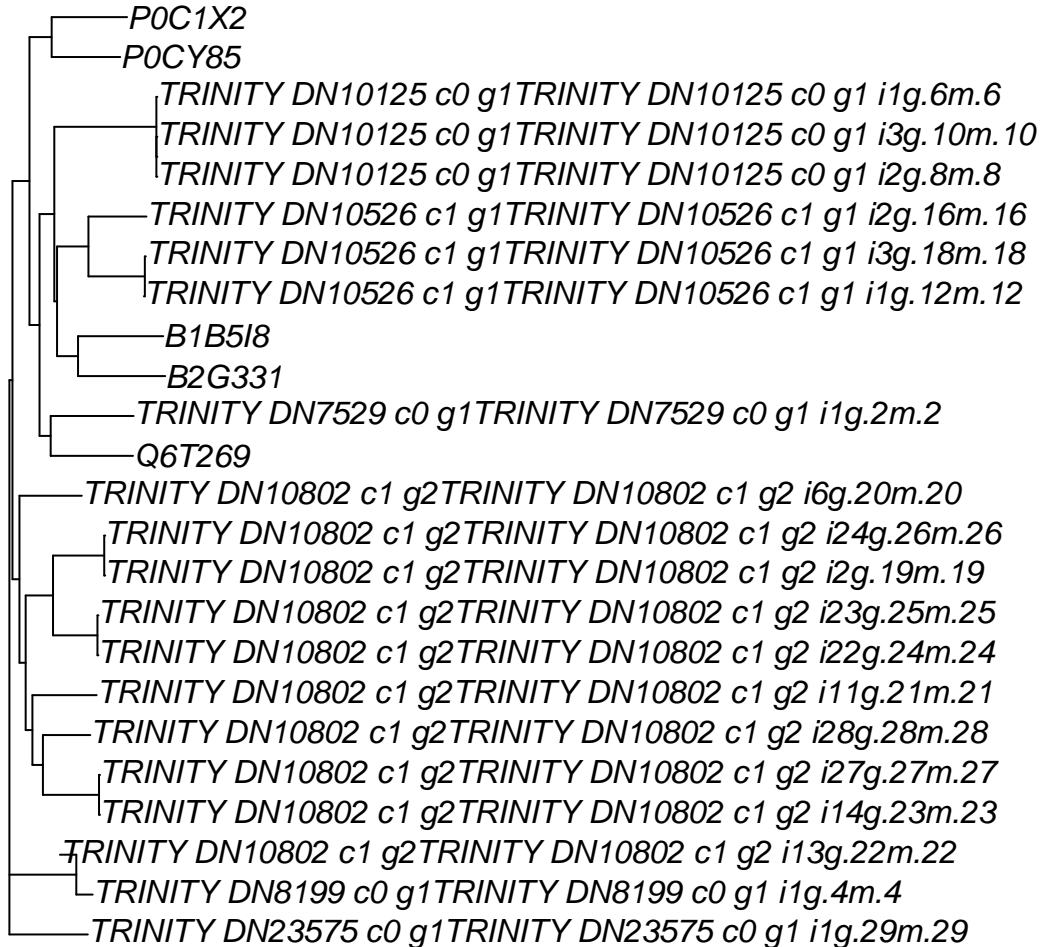

Supplement: S_F_1_C_sponsalis.tar.gz [file S_F_1_C_sponsalis.tar.gz]

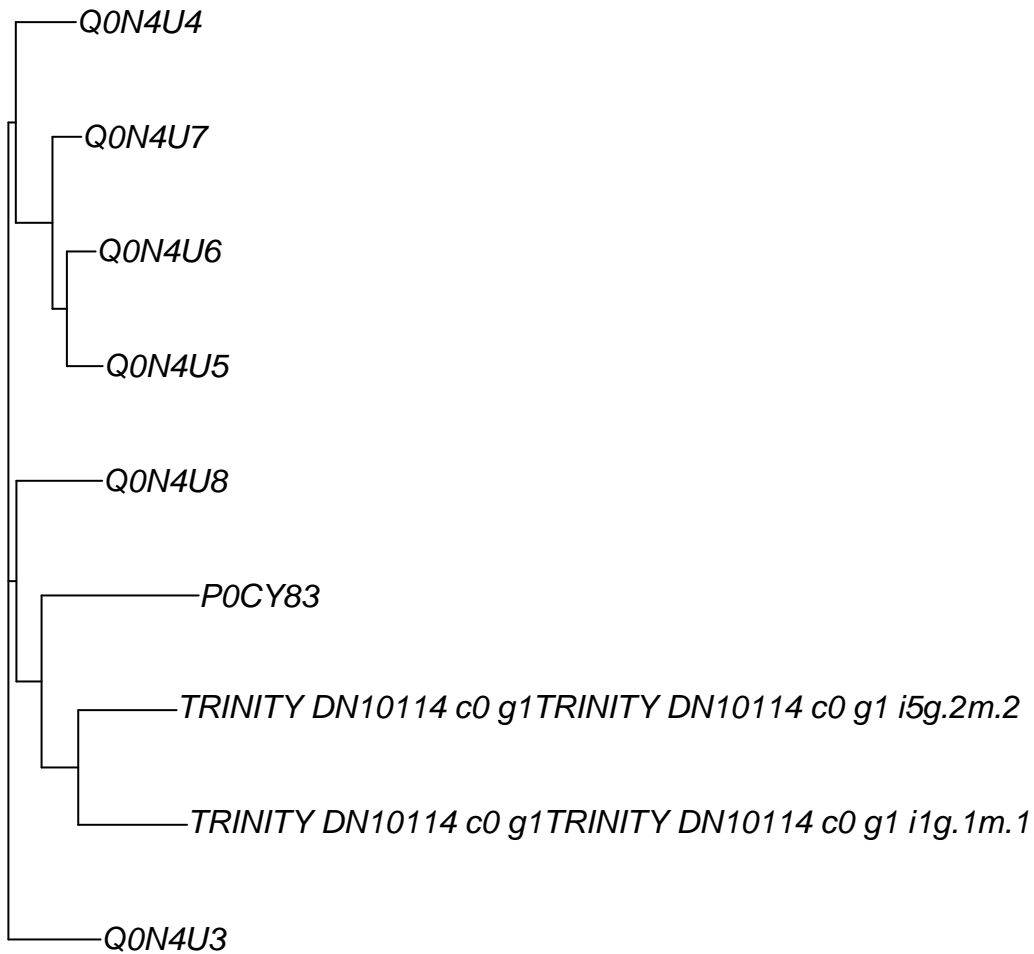

Supplement: S_F_1_C_sponsalis.tar.gz [file S_F_1_C_sponsalis.tar.gz]



Supplement: S_F_1_C_sponsalis.tar.gz [file S_F_1_C_sponsalis.tar.gz]

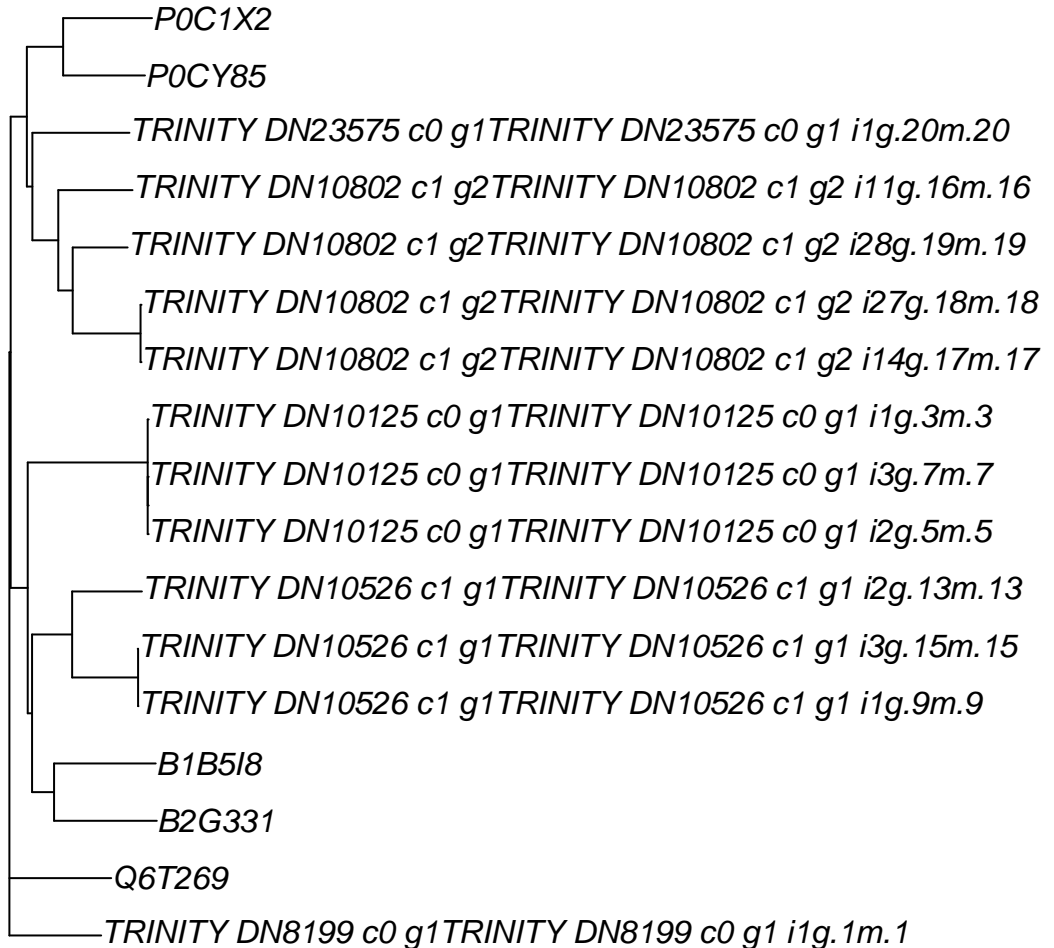

Supplement: S_F_1_C_sponsalis.tar.gz [file S_F_1_C_sponsalis.tar.gz]



Supplement: S_F_1_C_sponsalis.tar.gz [file S_F_1_C_sponsalis.tar.gz]



Supplement: S_F_1_C_sponsalis.tar.gz [file S_F_1_C_sponsalis.tar.gz]

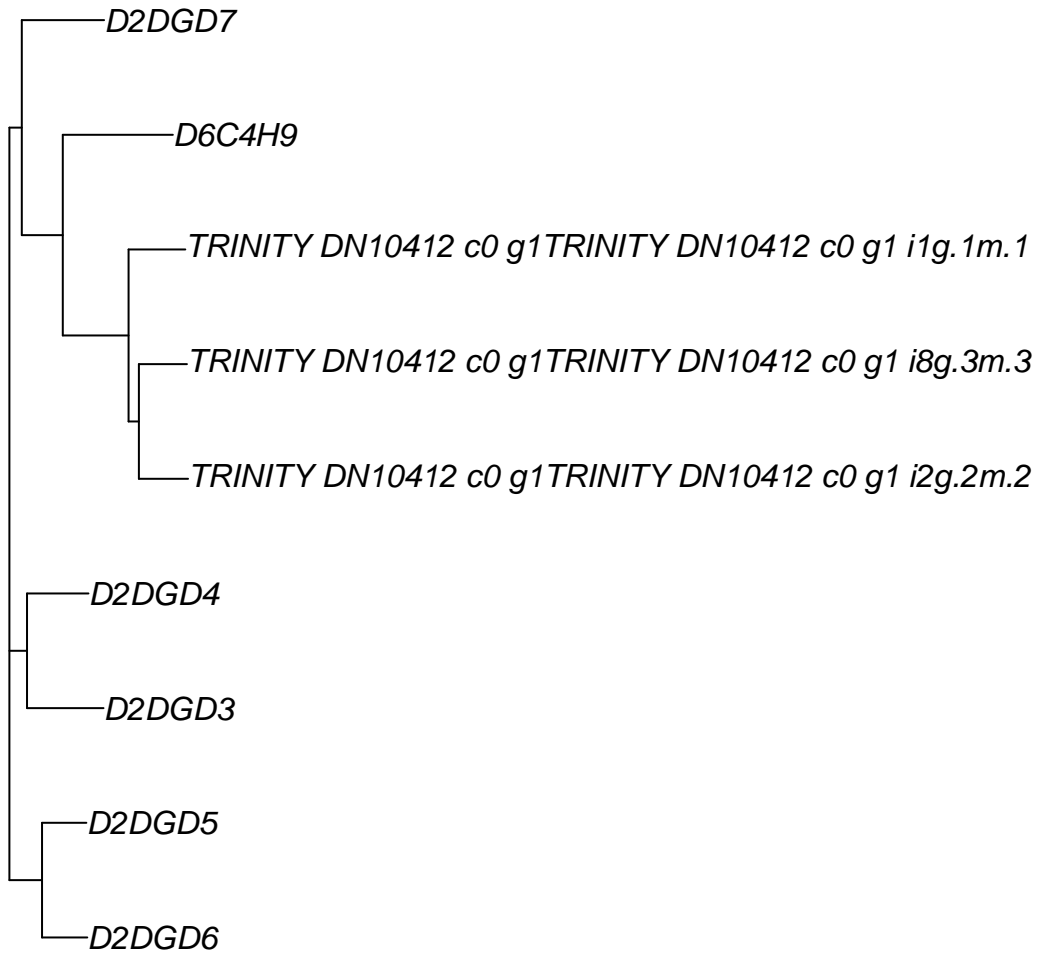

Supplement: S_F_1_C_sponsalis.tar.gz [file S_F_1_C_sponsalis.tar.gz]

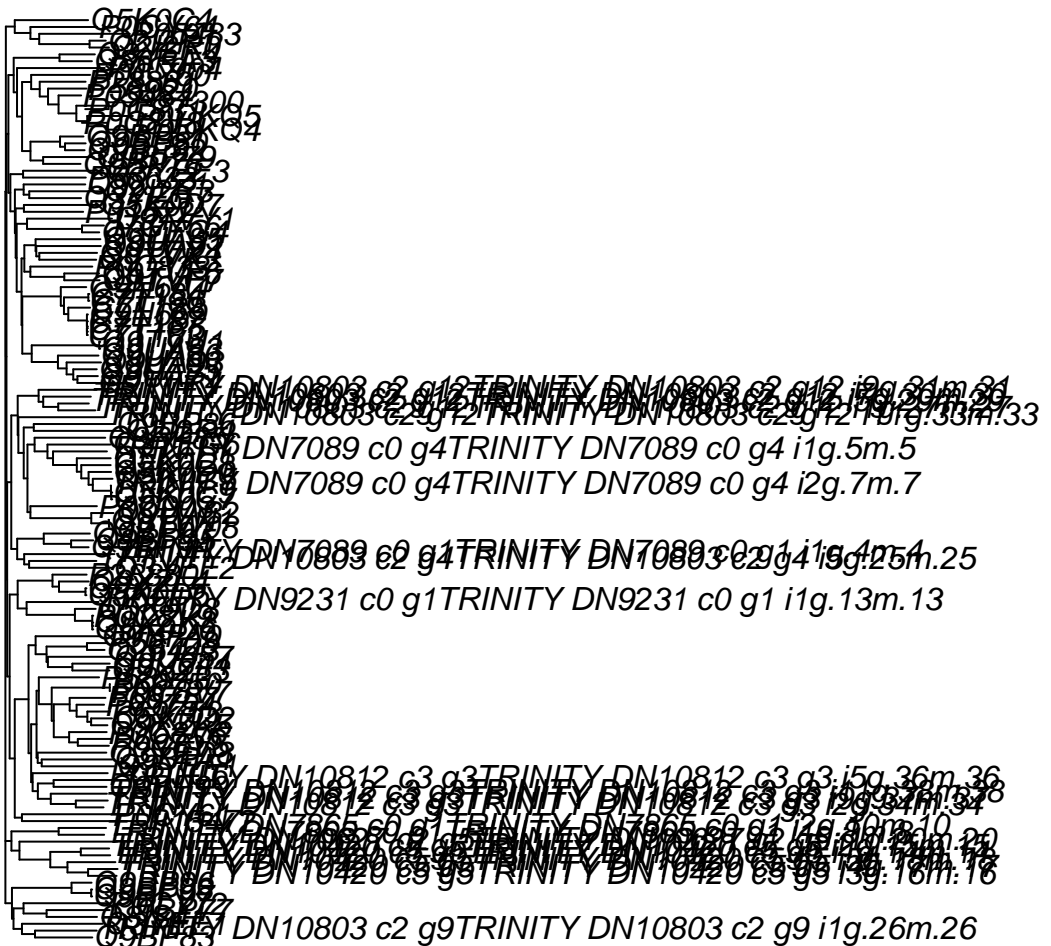

Supplement: S_F_1_C_sponsalis.tar.gz [file S_F_1_C_sponsalis.tar.gz]



Supplement: S_F_1_C_sponsalis.tar.gz [file S_F_1_C_sponsalis.tar.gz]

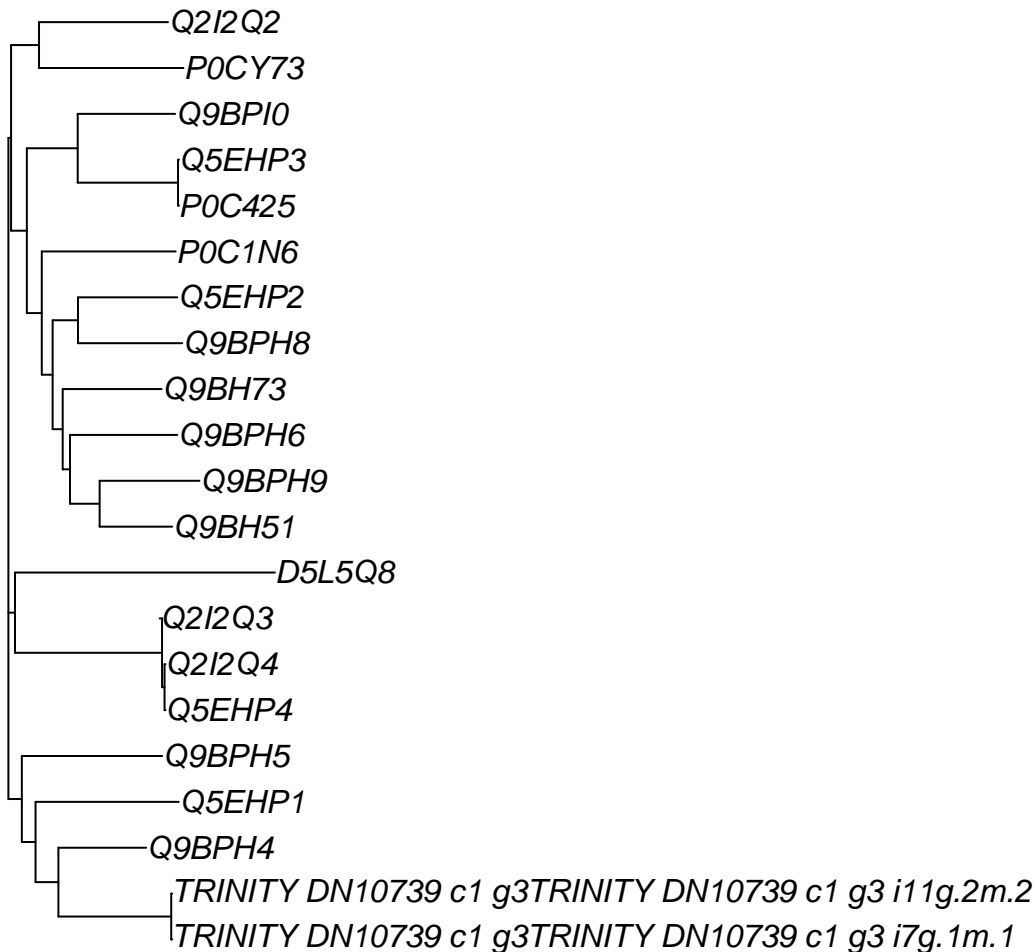

Supplement: S_F_1_C_sponsalis.tar.gz [file S_F_1_C_sponsalis.tar.gz]



Supplement: S_F_1_C_sponsalis.tar.gz [file S_F_1_C_sponsalis.tar.gz]

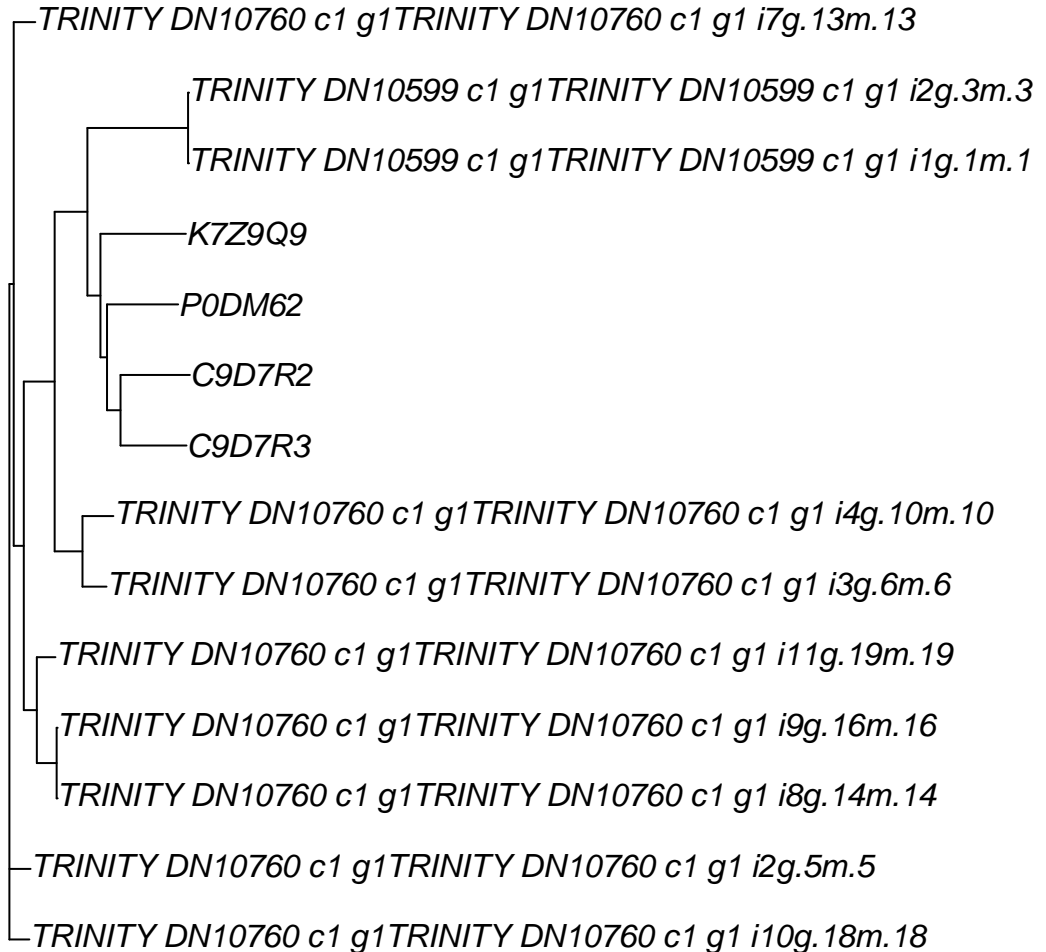

Supplement: S_F_1_C_sponsalis.tar.gz [file S_F_1_C_sponsalis.tar.gz]

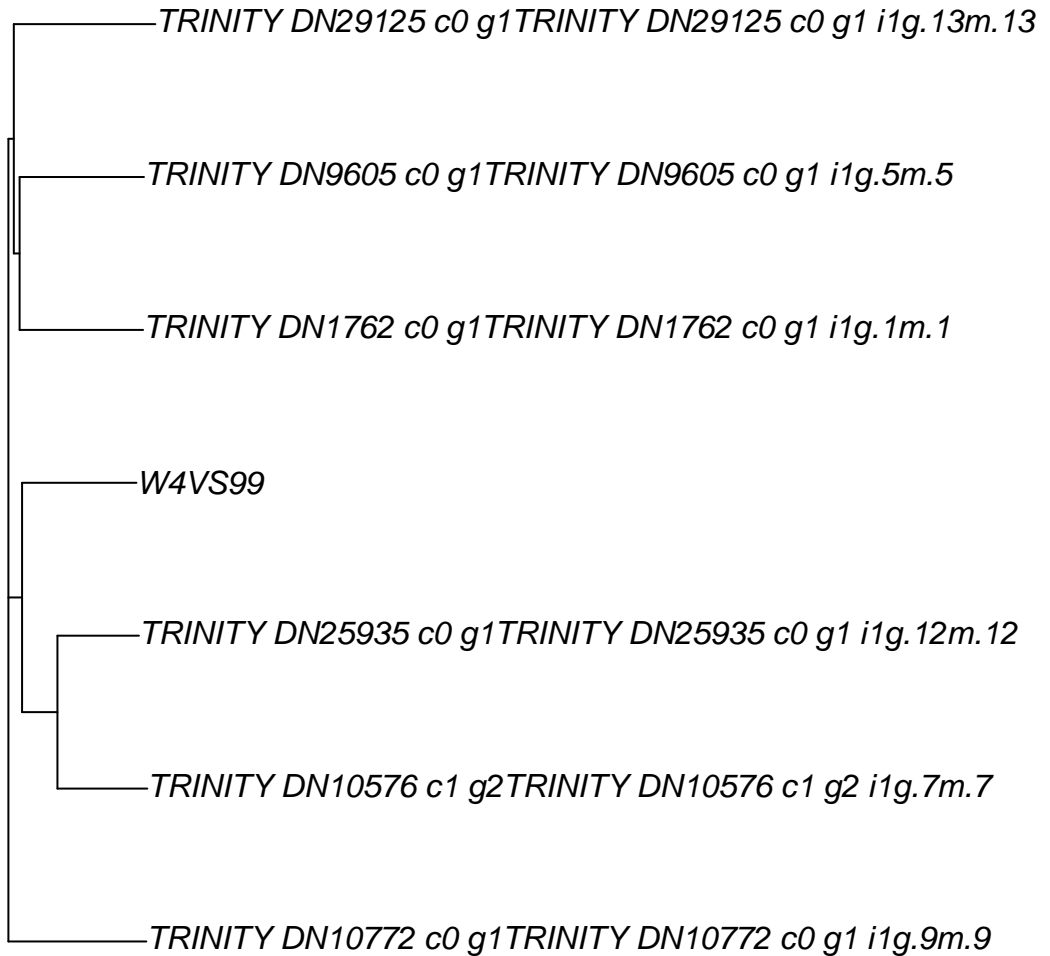

Supplement: S_F_1_C_sponsalis.tar.gz [file S_F_1_C_sponsalis.tar.gz]

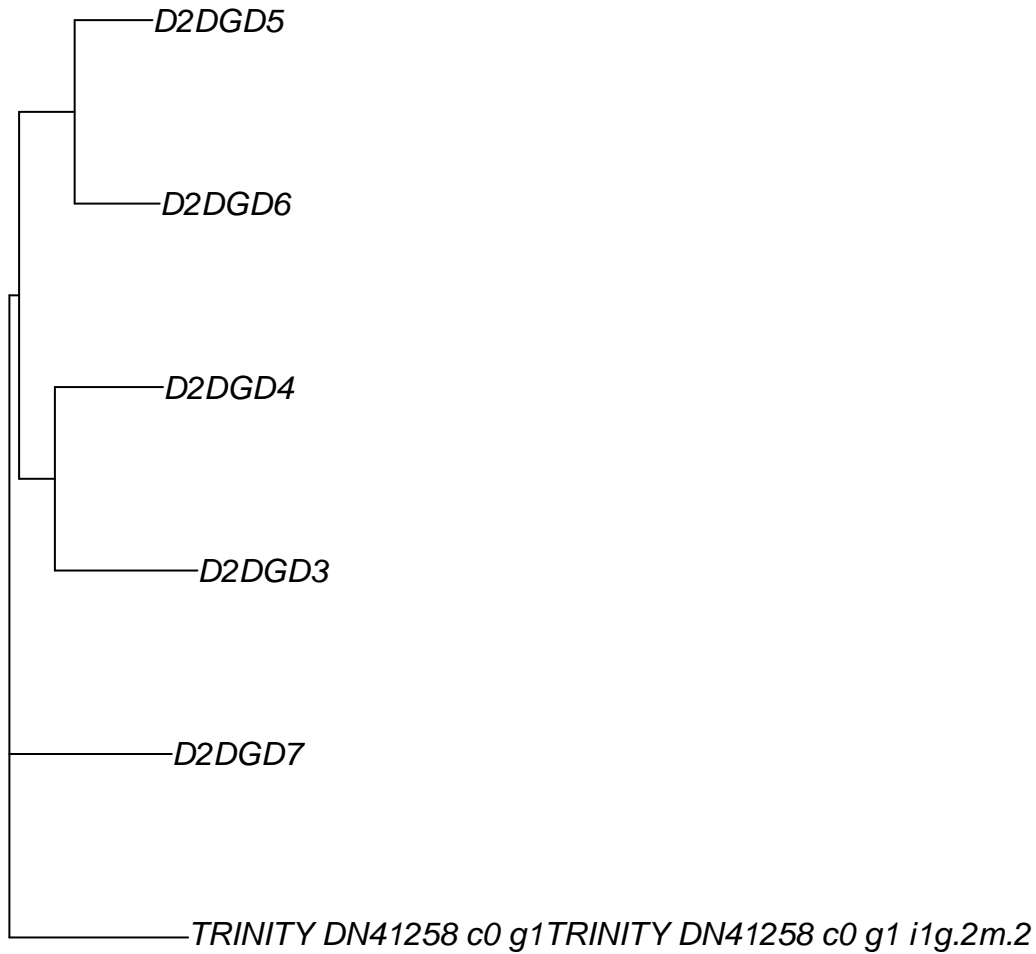

Supplement: S_F_1_C_sponsalis.tar.gz [file S_F_1_C_sponsalis.tar.gz]

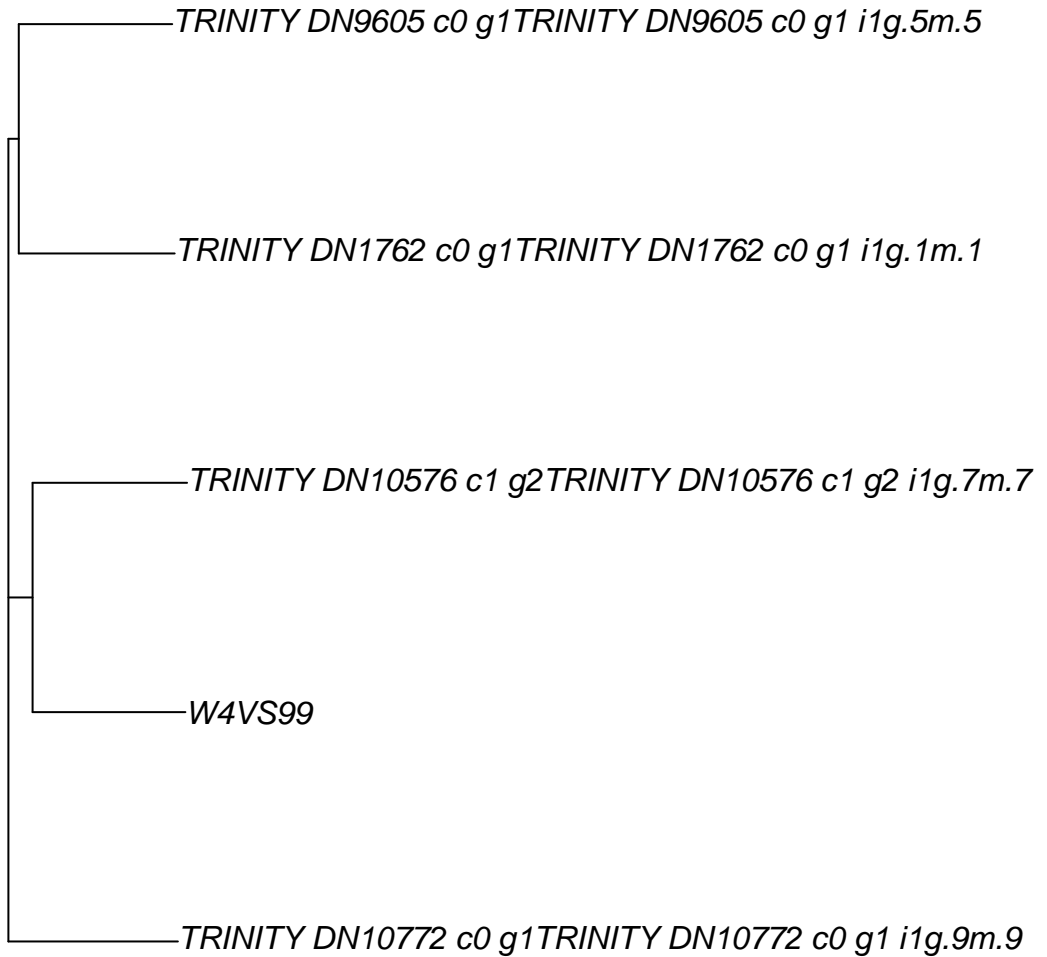

Supplement: S_F_1_C_sponsalis.tar.gz [file S_F_1_C_sponsalis.tar.gz]

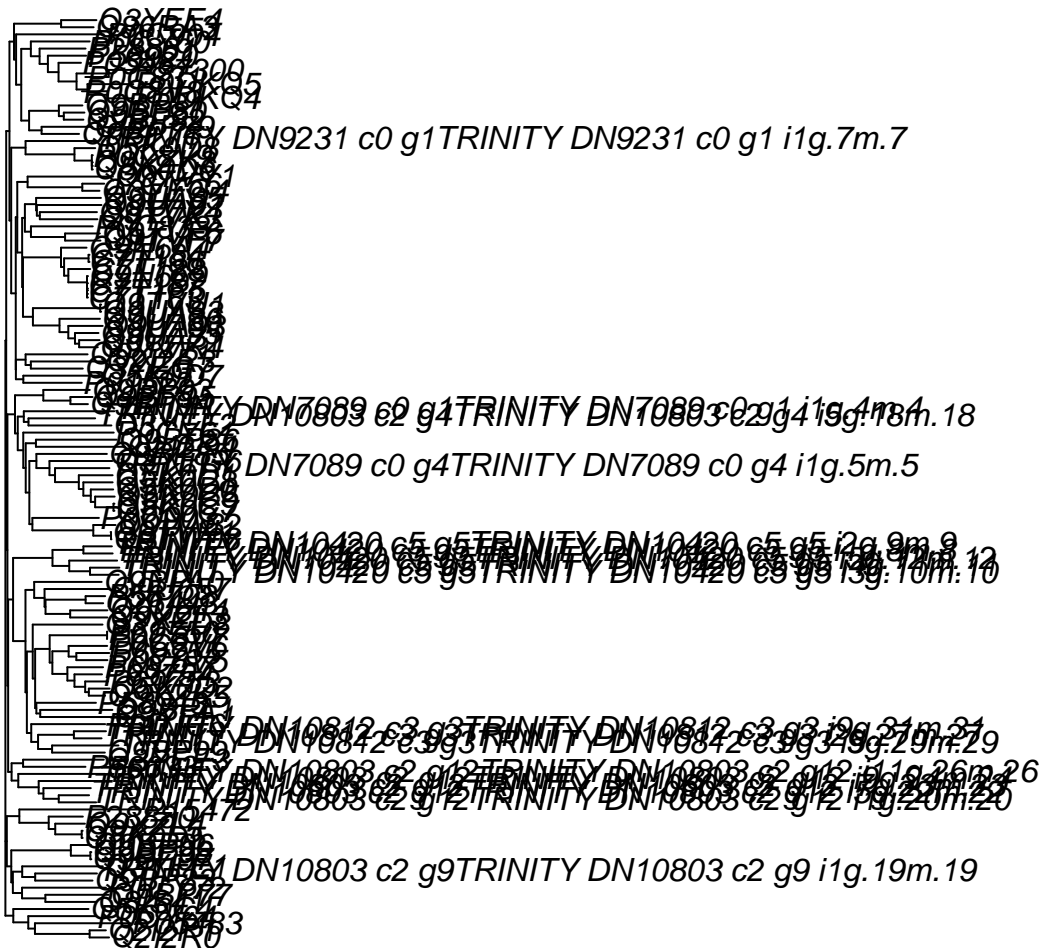

Supplement: S_F_1_C_sponsalis.tar.gz [file S_F_1_C_sponsalis.tar.gz]



Supplement: S_F_1_C_sponsalis.tar.gz [file S_F_1_C_sponsalis.tar.gz]

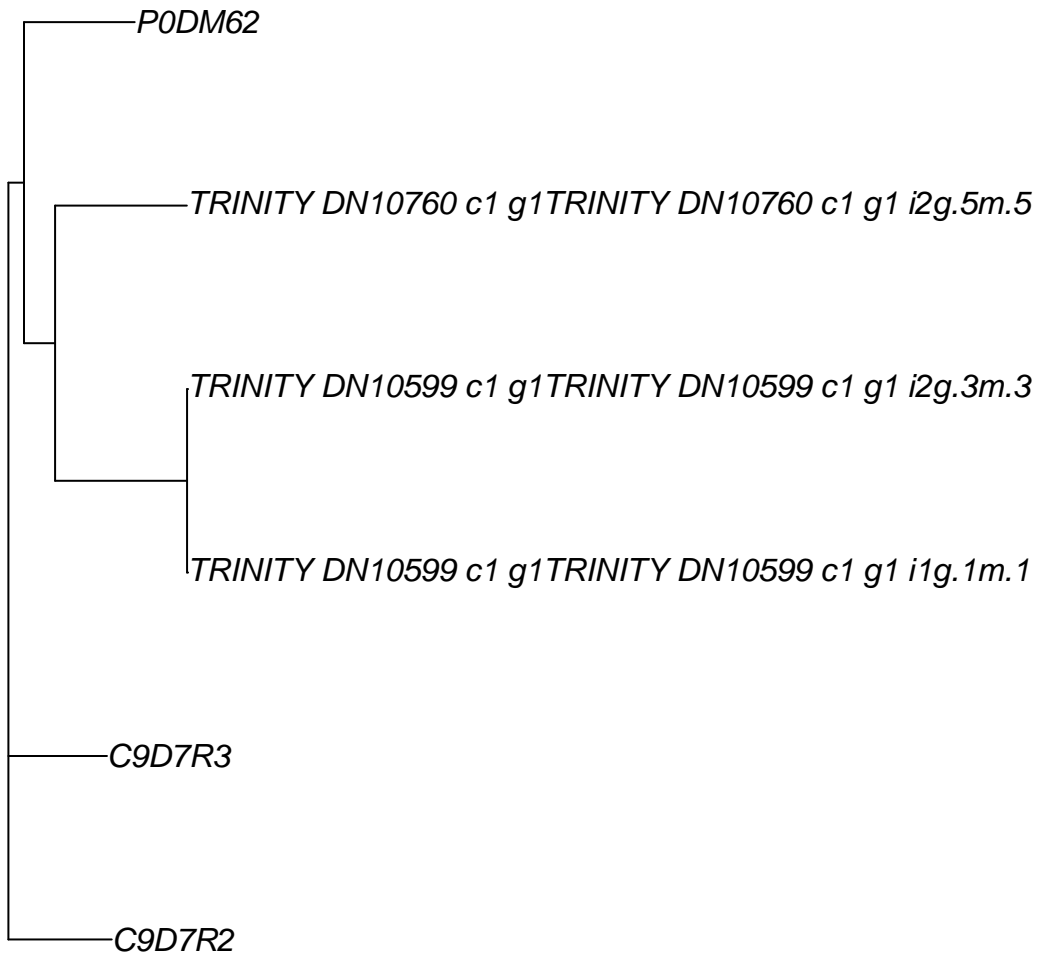

Supplement: S_F_1_C_sponsalis.tar.gz [file S_F_1_C_sponsalis.tar.gz]

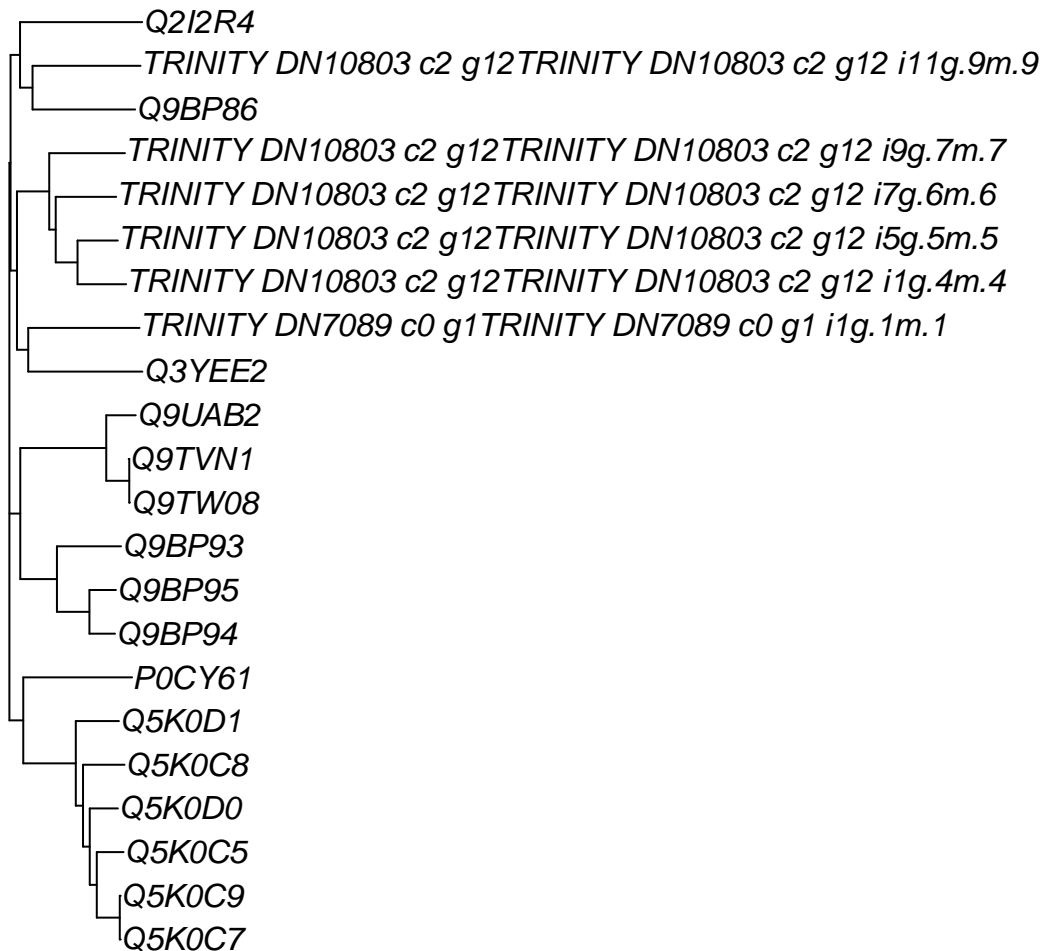

Supplement: S_F_1_C_sponsalis.tar.gz [file S_F_1_C_sponsalis.tar.gz]



Supplement: S_F_1_C_sponsalis.tar.gz [file S_F_1_C_sponsalis.tar.gz]



Supplement: S_F_1_C_sponsalis.tar.gz [file S_F_1_C_sponsalis.tar.gz]

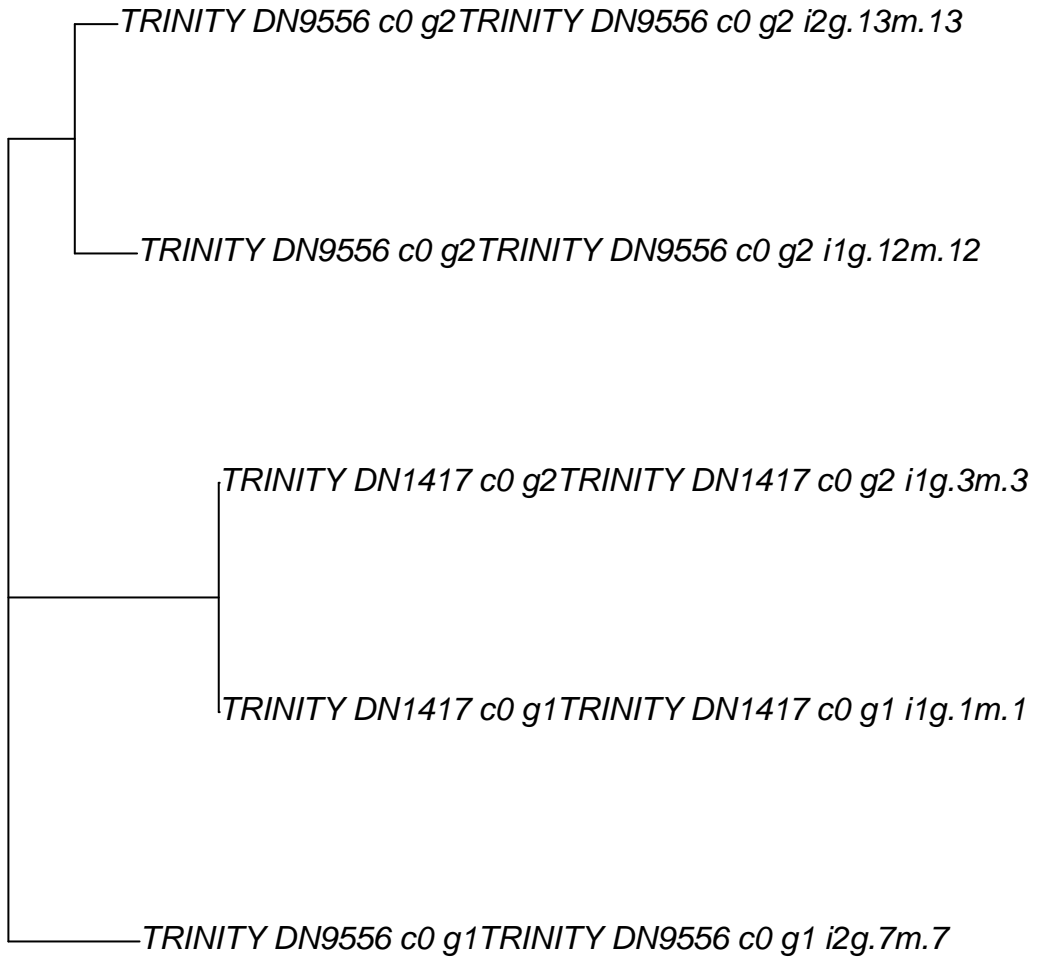

Supplement: S_F_1_C_sponsalis.tar.gz [file S_F_1_C_sponsalis.tar.gz]

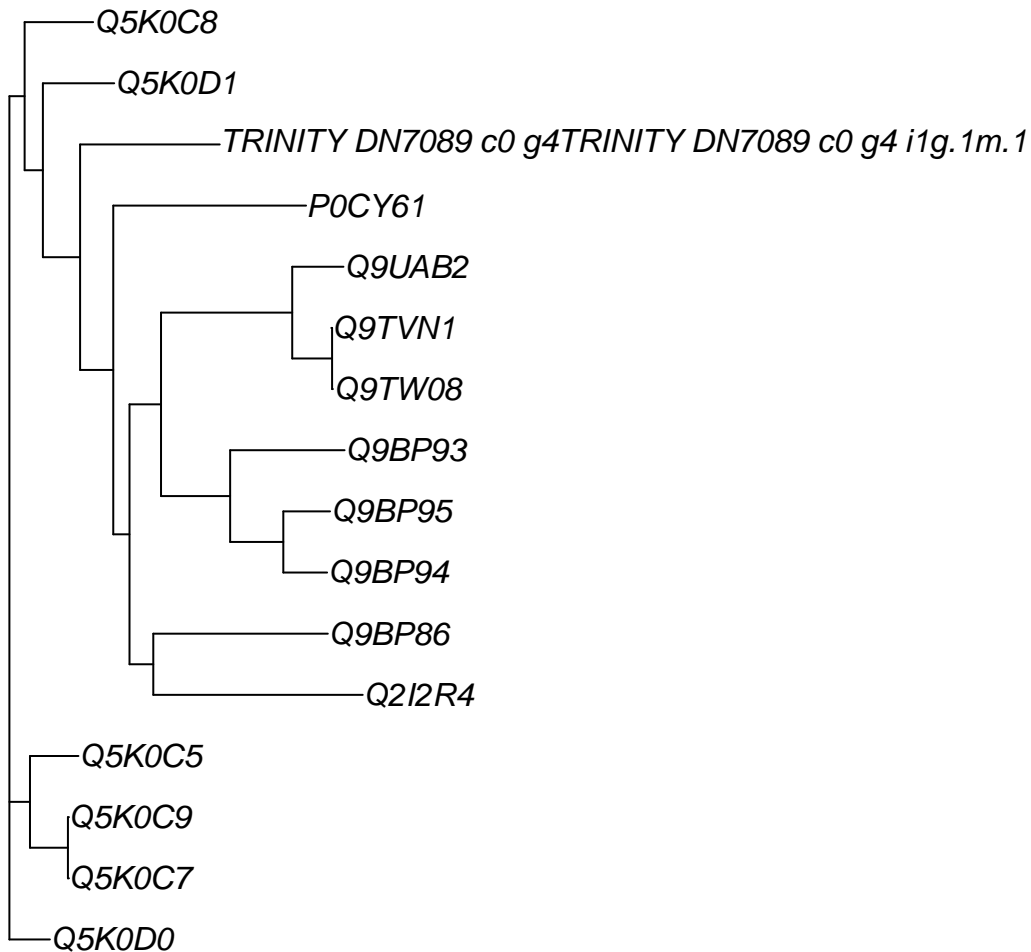

Supplement: S_F_1_C_sponsalis.tar.gz [file S_F_1_C_sponsalis.tar.gz]



Supplement: S_F_1_C_sponsalis.tar.gz [file S_F_1_C_sponsalis.tar.gz]



Supplement: S_F_1_C_sponsalis.tar.gz [file S_F_1_C_sponsalis.tar.gz]

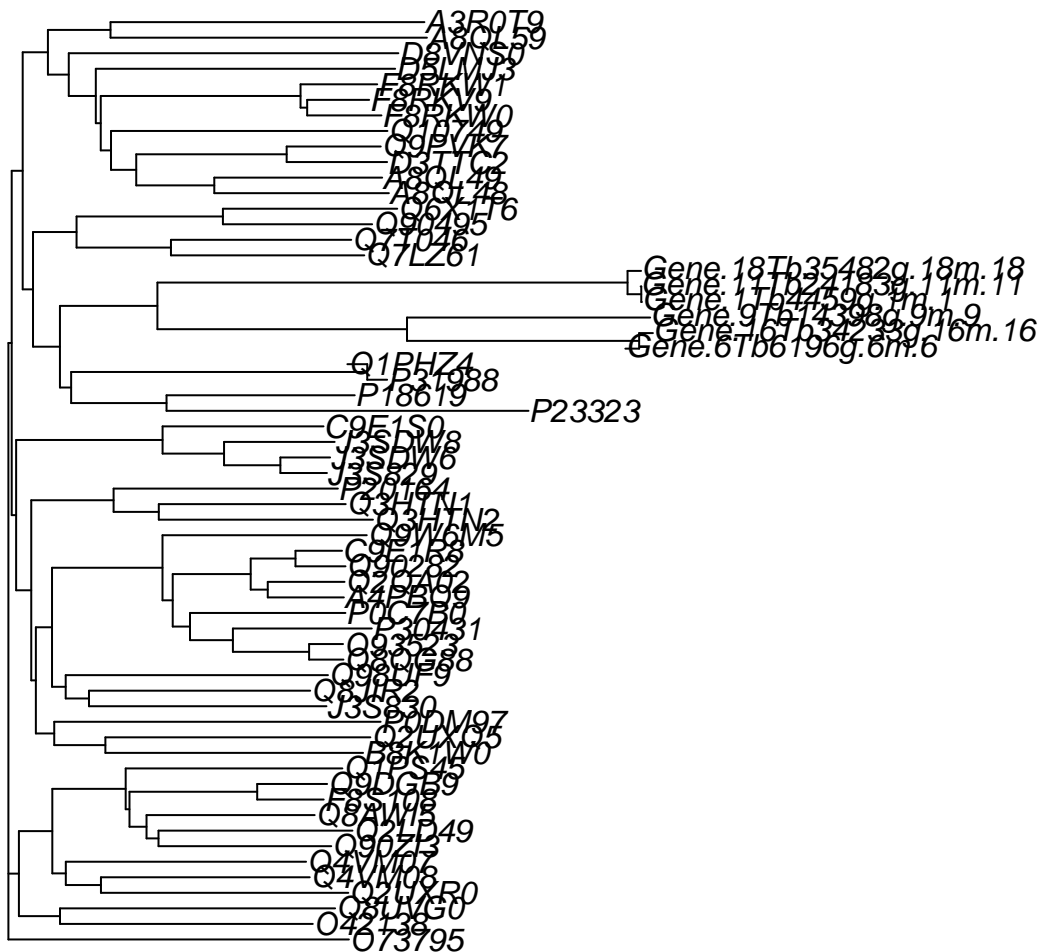

Supplement: S_F_4_T_bicarinatum_GAS.tar.gz [file S_F_4_T_bicarinatum_GAS.tar.gz]

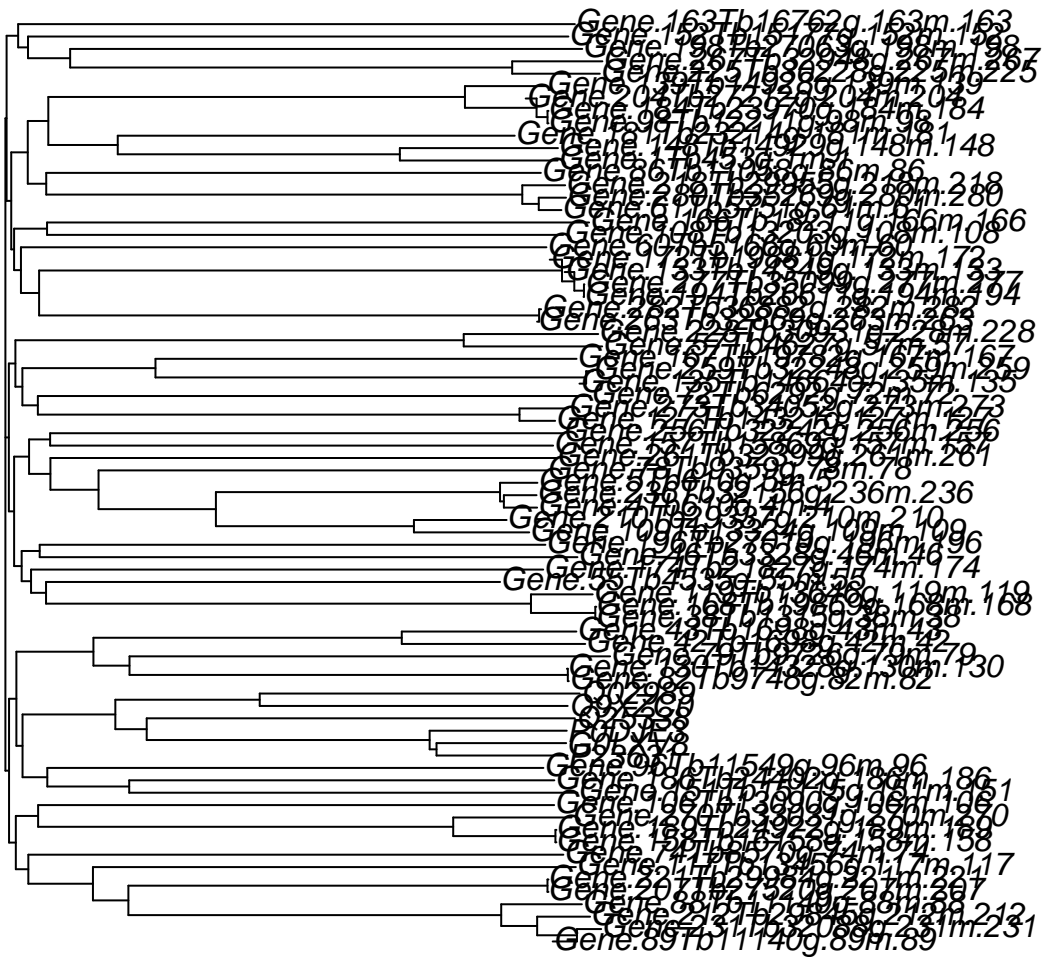

Supplement: S_F_4_T_bicarinatum_GAS.tar.gz [file S_F_4_T_bicarinatum_GAS.tar.gz]

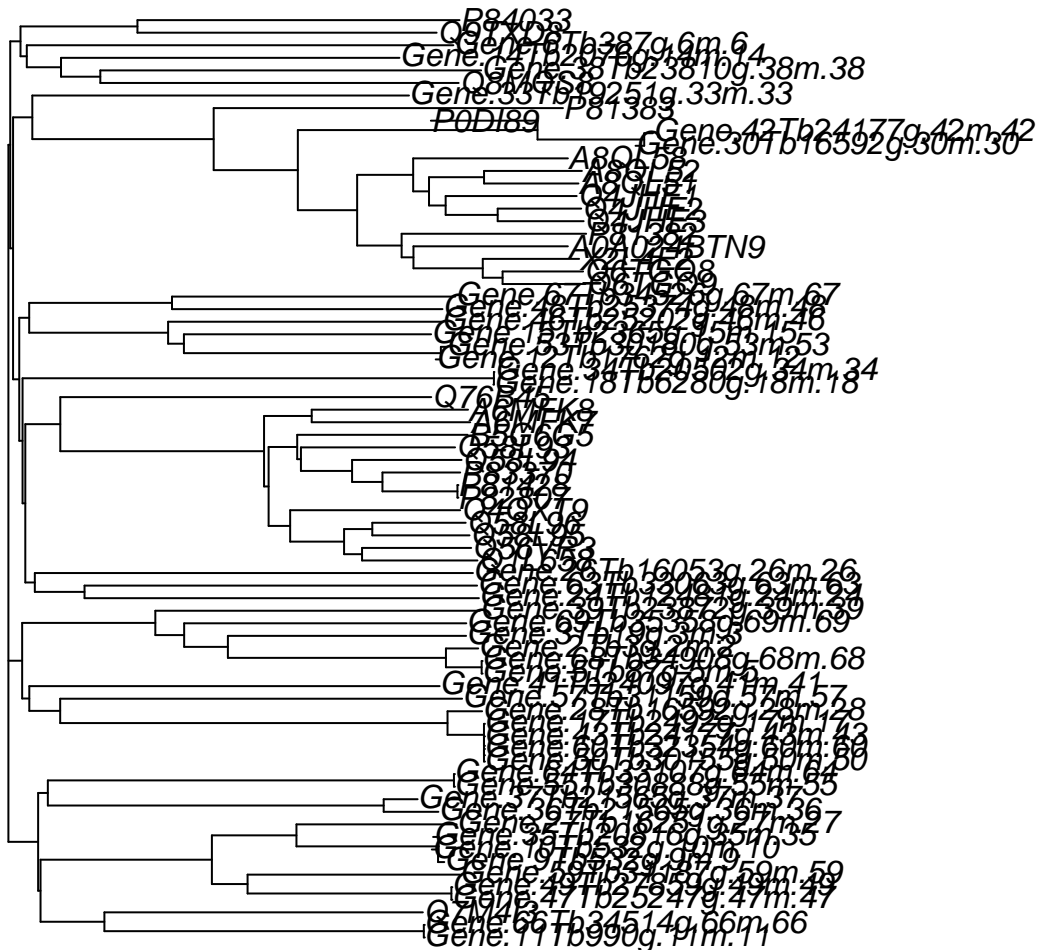

Supplement: S_F_4_T_bicarinatum_GAS.tar.gz [file S_F_4_T_bicarinatum_GAS.tar.gz]

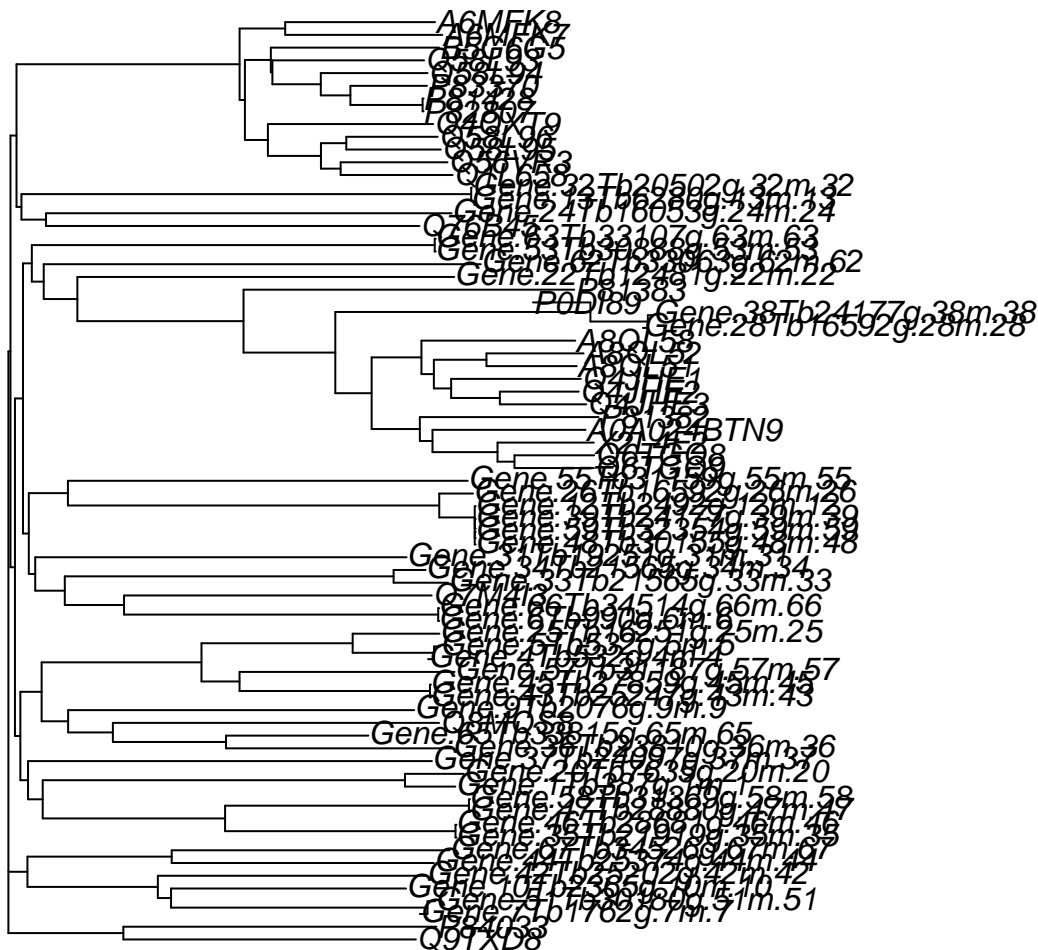

Supplement: S_F_4_T_bicarinatum_GAS.tar.gz [file S_F_4_T_bicarinatum_GAS.tar.gz]

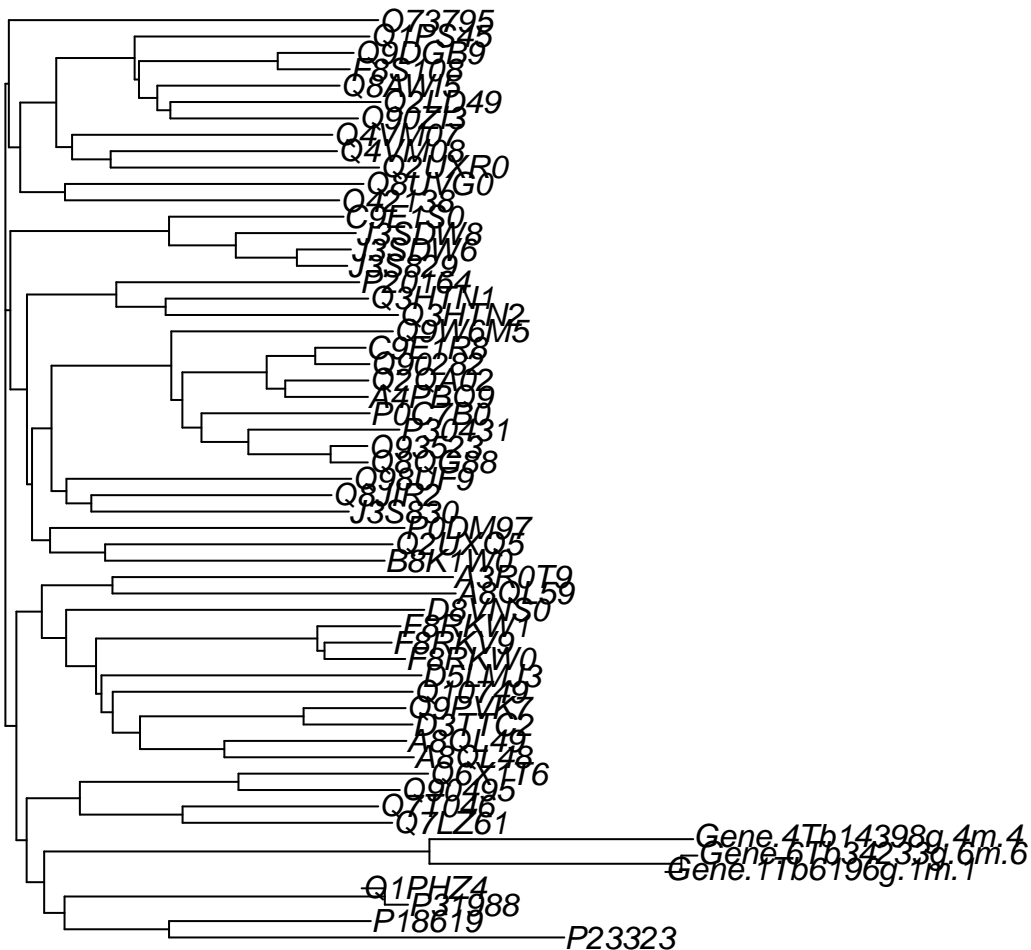

Supplement: S_F_4_T_bicarinatum_GAS.tar.gz [file S_F_4_T_bicarinatum_GAS.tar.gz]

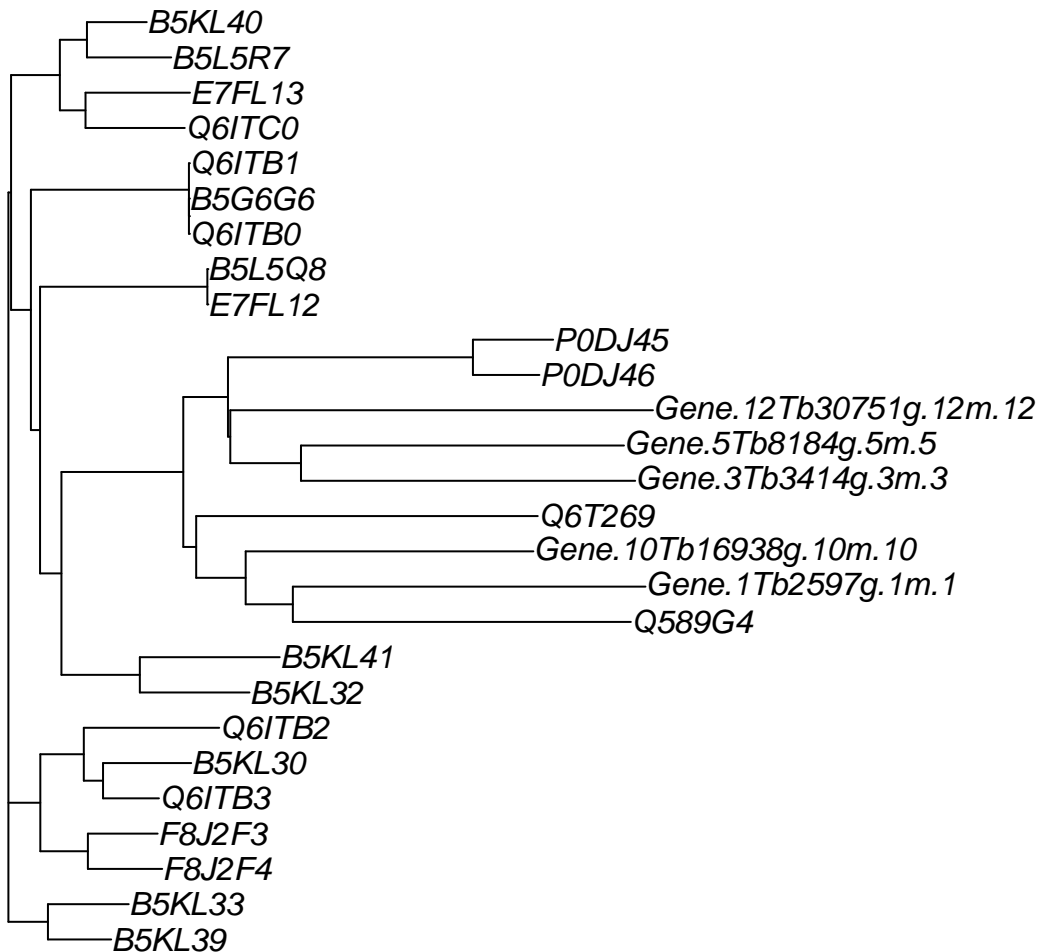

Supplement: S_F_4_T_bicarinatum_GAS.tar.gz [file S_F_4_T_bicarinatum_GAS.tar.gz]

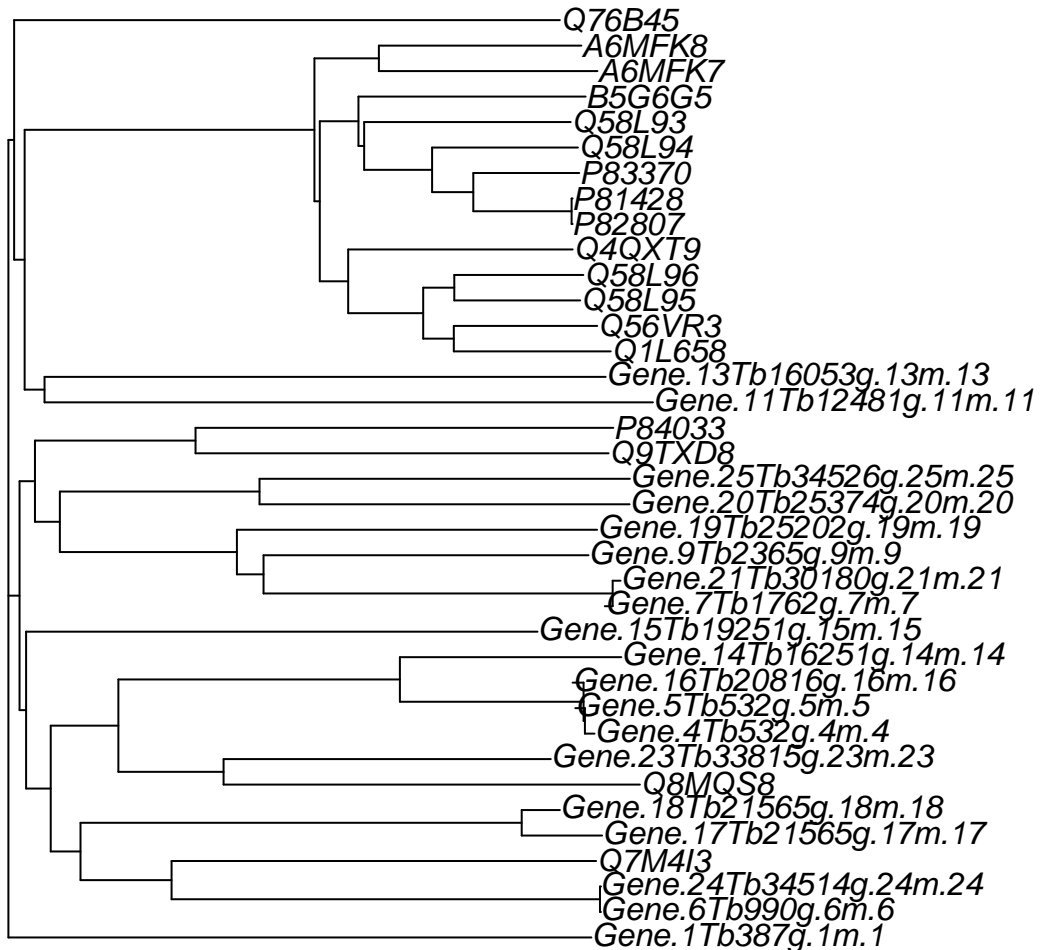

Supplement: S_F_4_T_bicarinatum_GAS.tar.gz [file S_F_4_T_bicarinatum_GAS.tar.gz]

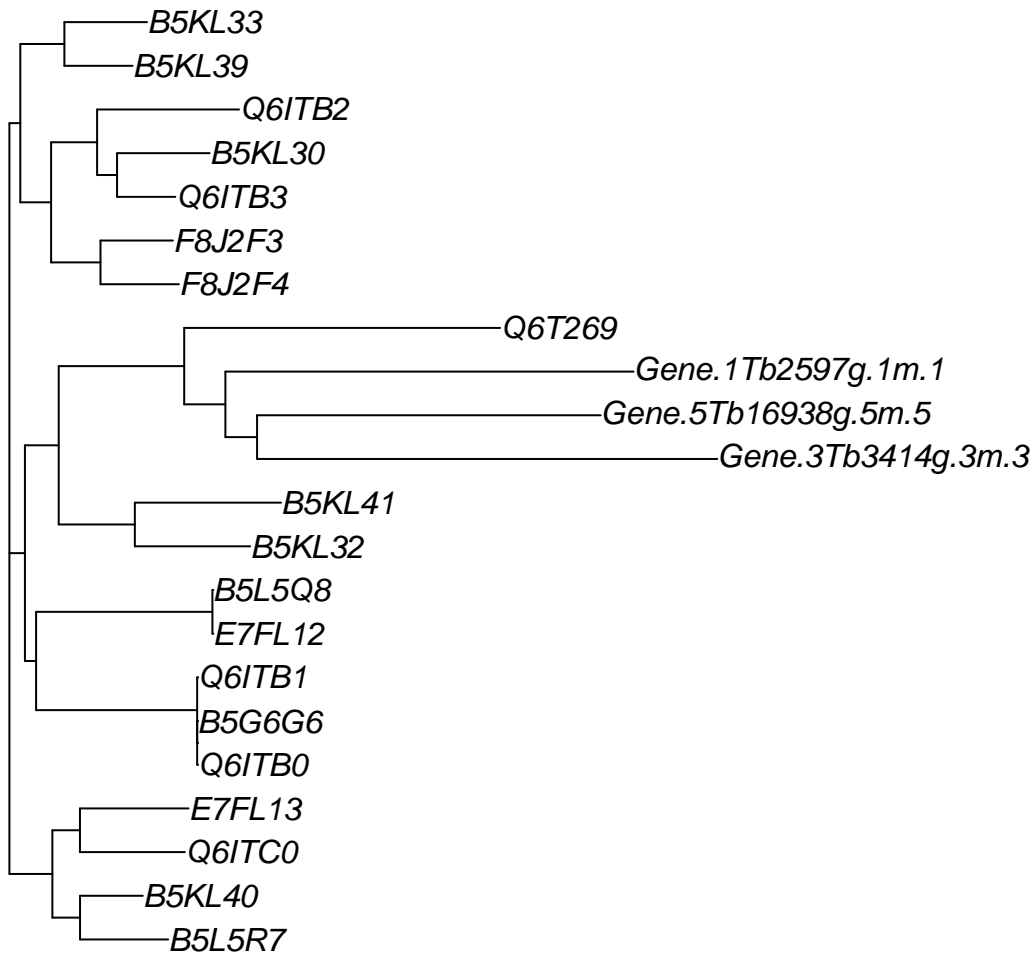

Supplement: S_F_4_T_bicarinatum_GAS.tar.gz [file S_F_4_T_bicarinatum_GAS.tar.gz]

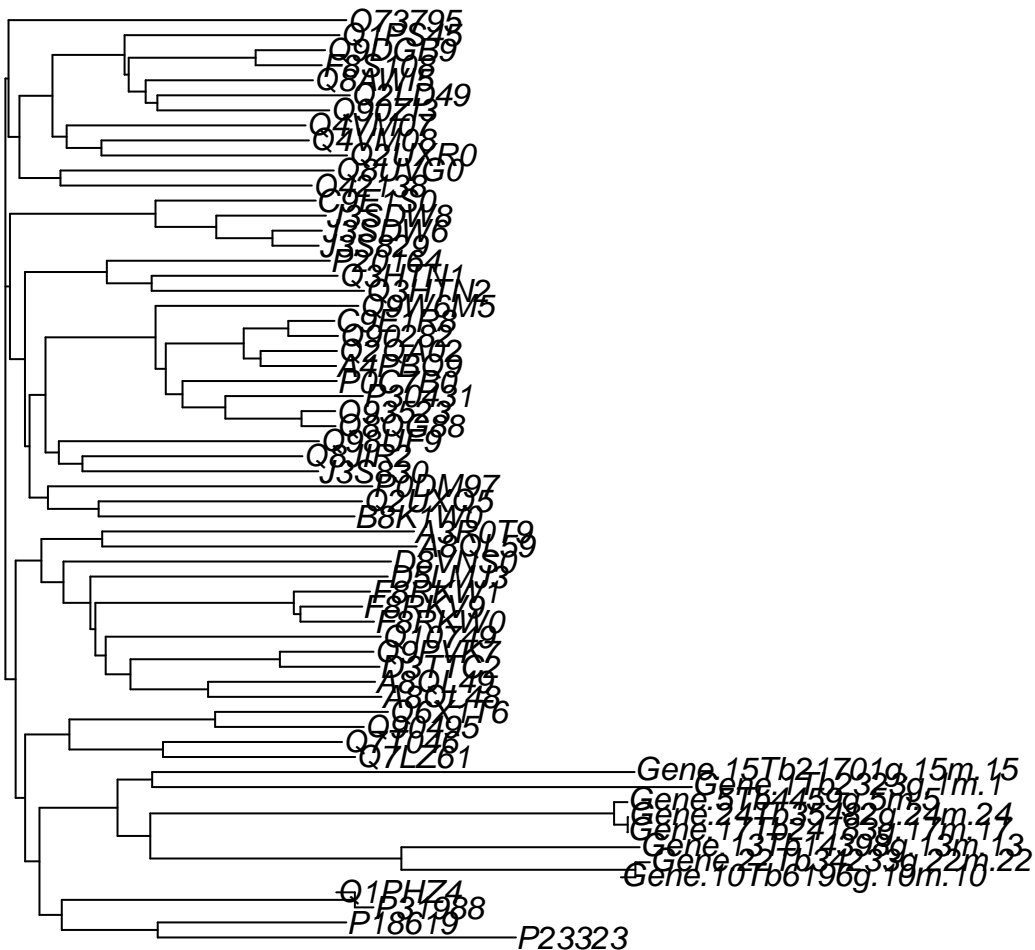

Supplement: S_F_4_T_bicarinatum_GAS.tar.gz [file S_F_4_T_bicarinatum_GAS.tar.gz]

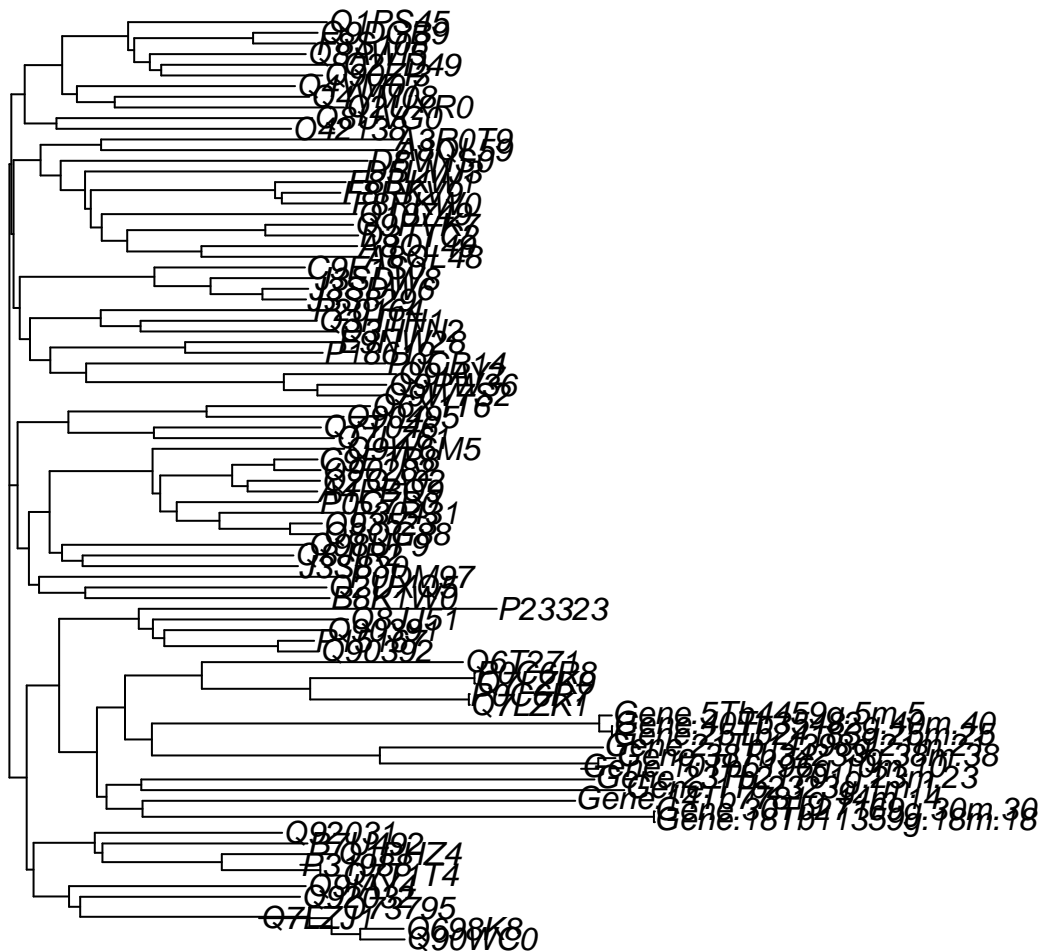

Supplement: S_F_4_T_bicarinatum_GAS.tar.gz [file S_F_4_T_bicarinatum_GAS.tar.gz]

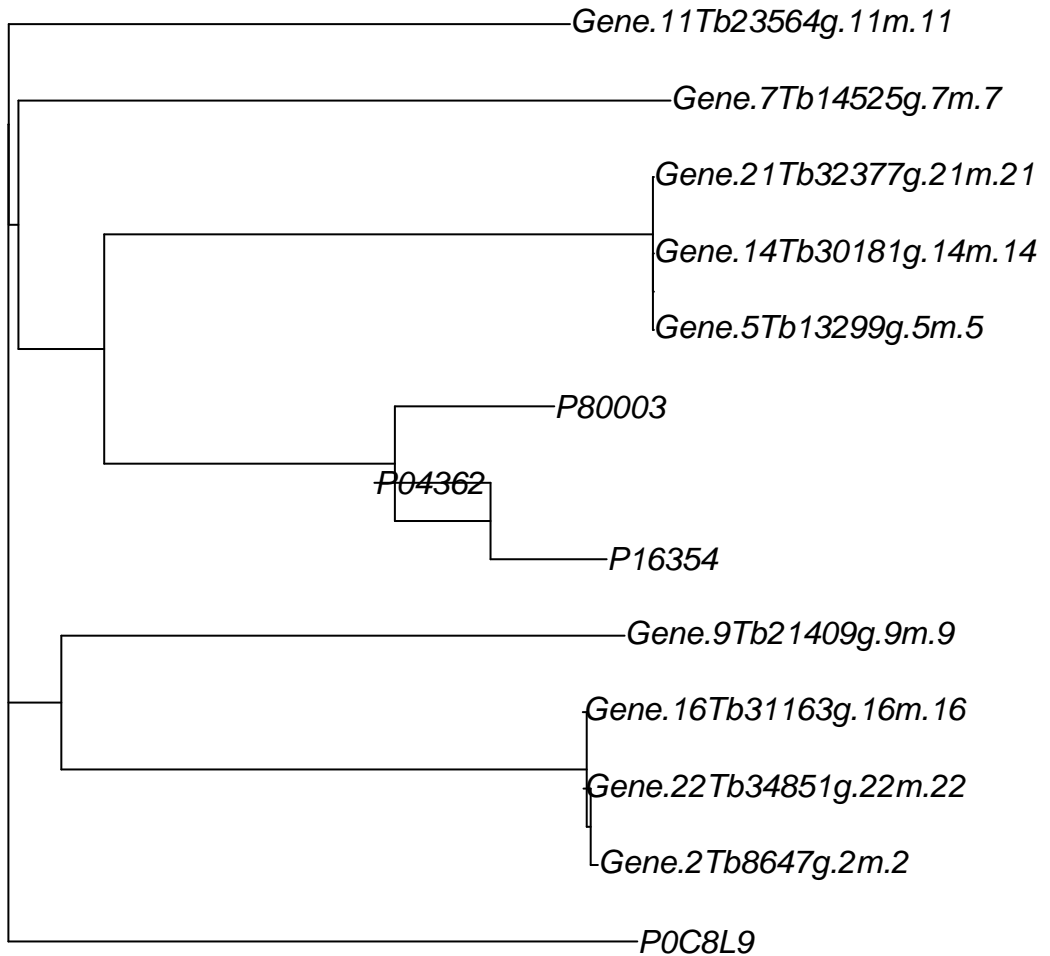

Supplement: S_F_4_T_bicarinatum_GAS.tar.gz [file S_F_4_T_bicarinatum_GAS.tar.gz]

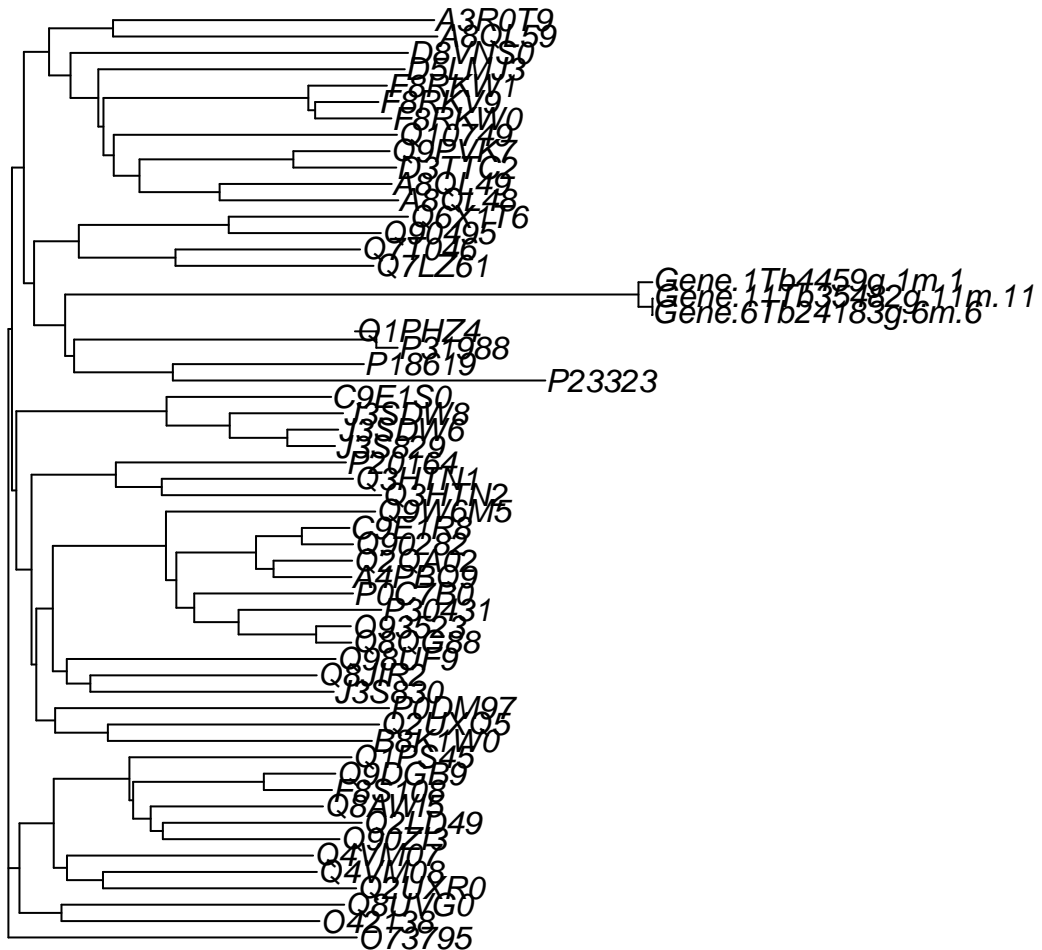

Supplement: S_F_4_T_bicarinatum_GAS.tar.gz [file S_F_4_T_bicarinatum_GAS.tar.gz]



Supplement: S_F_4_T_bicarinatum_GAS.tar.gz [file S_F_4_T_bicarinatum_GAS.tar.gz]

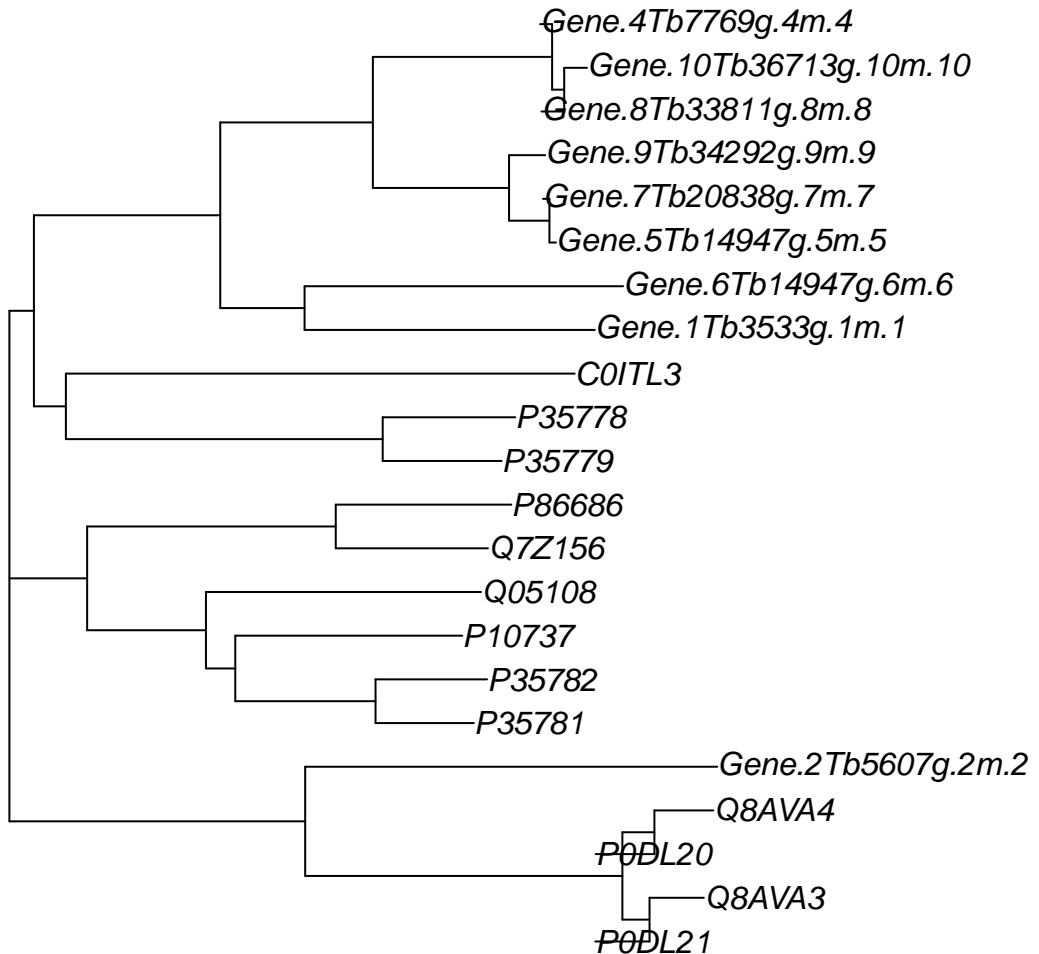

Supplement: S_F_4_T_bicarinatum_GAS.tar.gz [file S_F_4_T_bicarinatum_GAS.tar.gz]

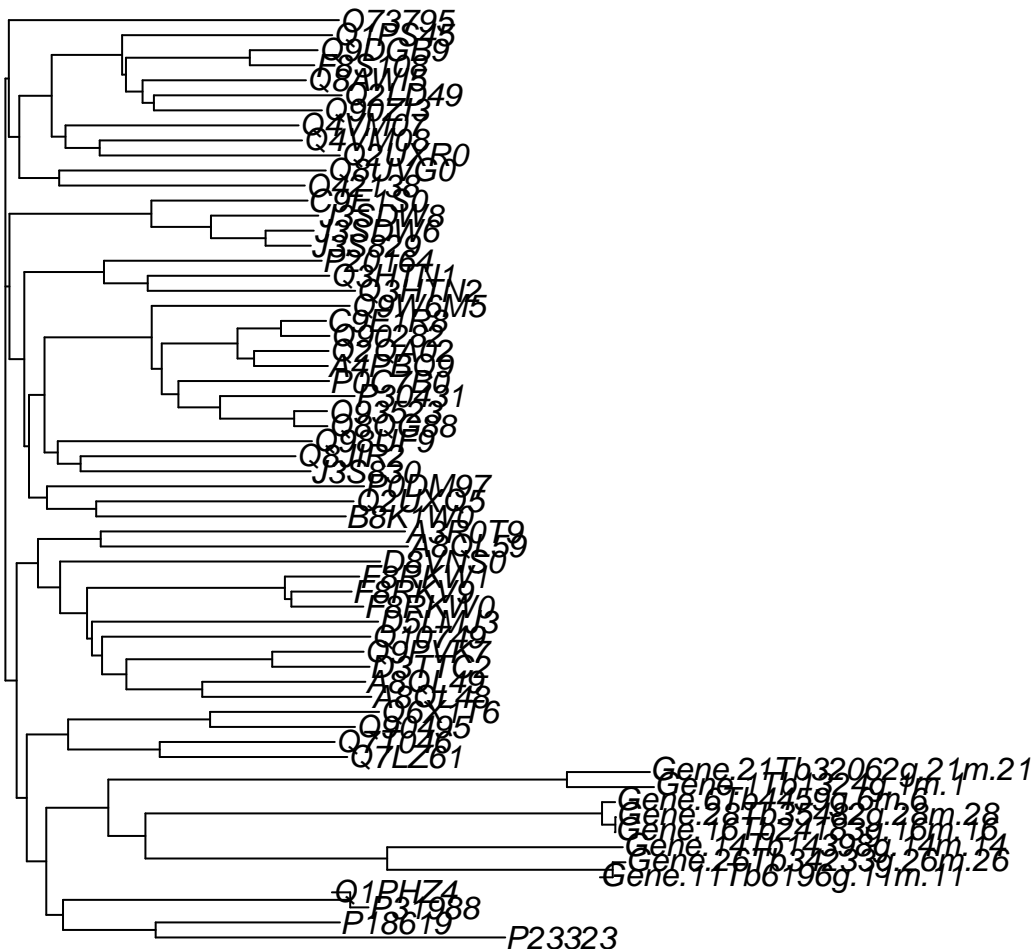

Supplement: S_F_4_T_bicarinatum_GAS.tar.gz [file S_F_4_T_bicarinatum_GAS.tar.gz]

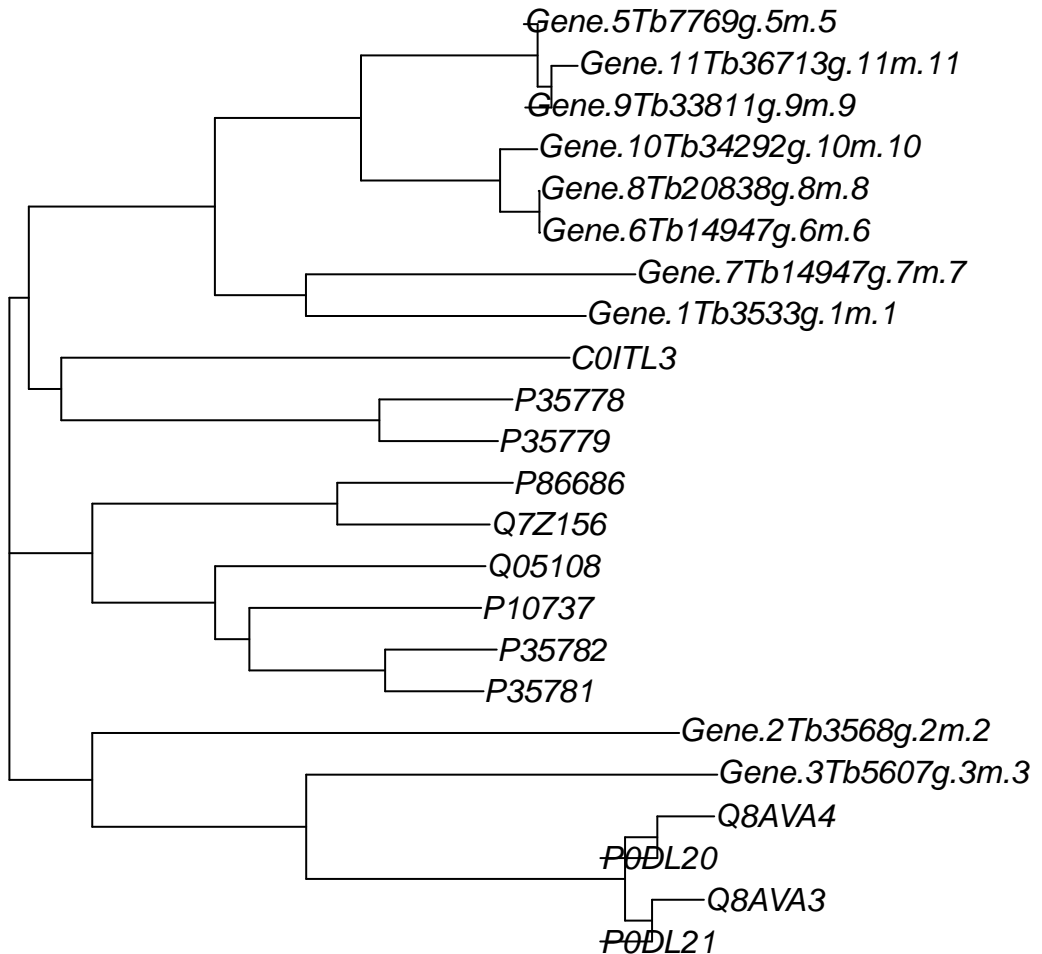

Supplement: S_F_4_T_bicarinatum_GAS.tar.gz [file S_F_4_T_bicarinatum_GAS.tar.gz]



Supplement: S_F_4_T_bicarinatum_GAS.tar.gz [file S_F_4_T_bicarinatum_GAS.tar.gz]

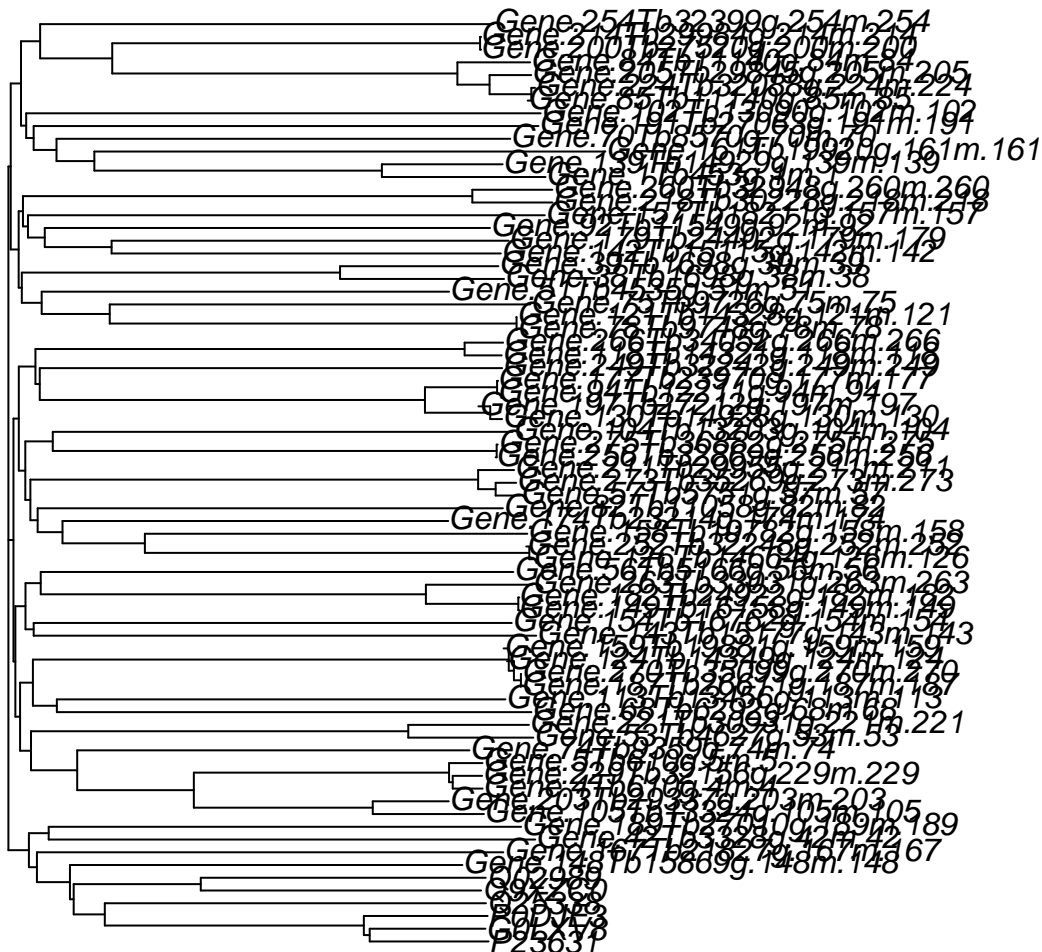

Supplement: S_F_4_T_bicarinatum_GAS.tar.gz [file S_F_4_T_bicarinatum_GAS.tar.gz]

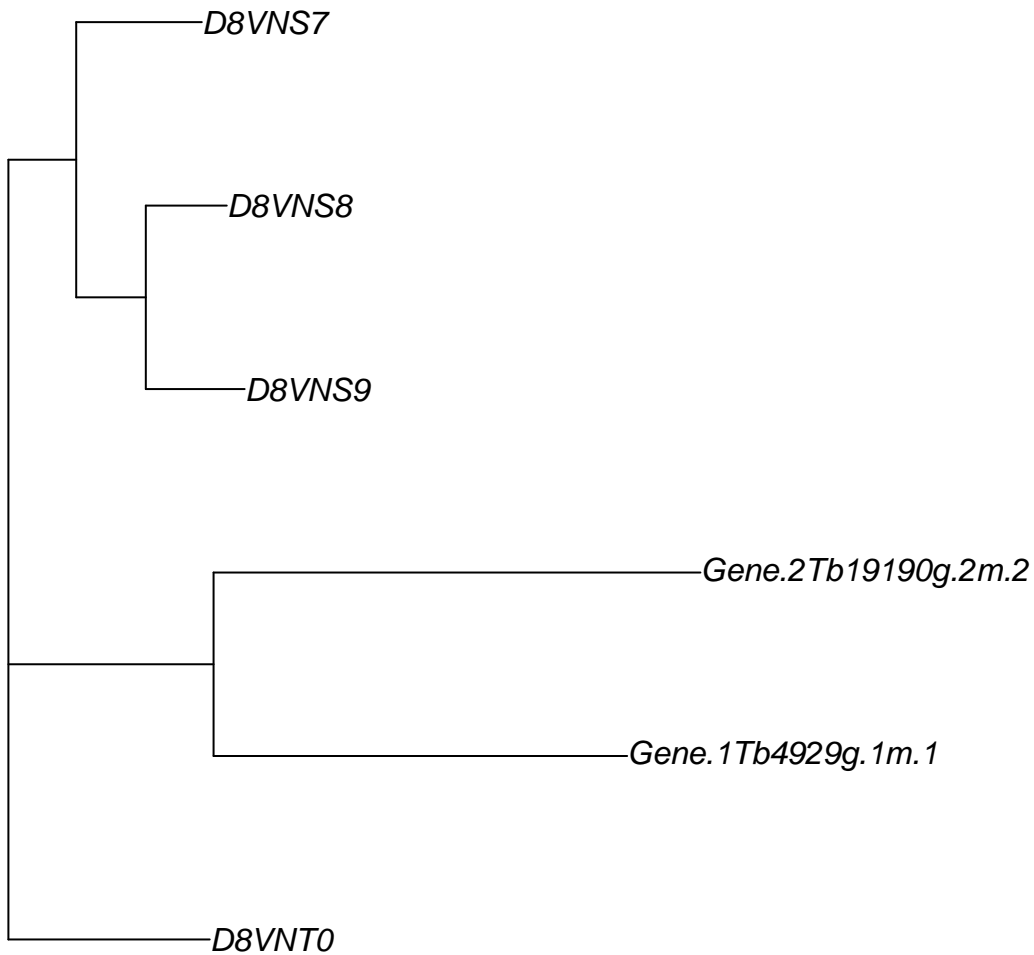

Supplement: S_F_4_T_bicarinatum_GAS.tar.gz [file S_F_4_T_bicarinatum_GAS.tar.gz]

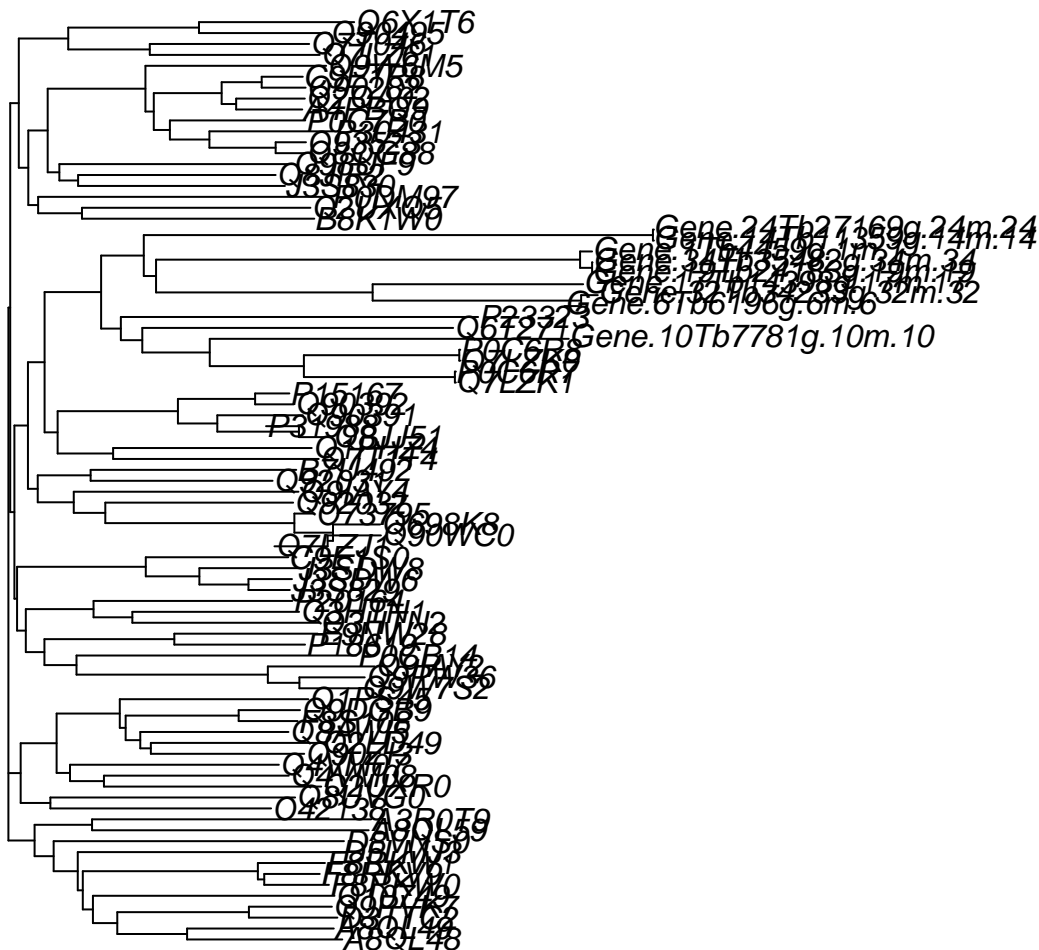

Supplement: S_F_4_T_bicarinatum_GAS.tar.gz [file S_F_4_T_bicarinatum_GAS.tar.gz]

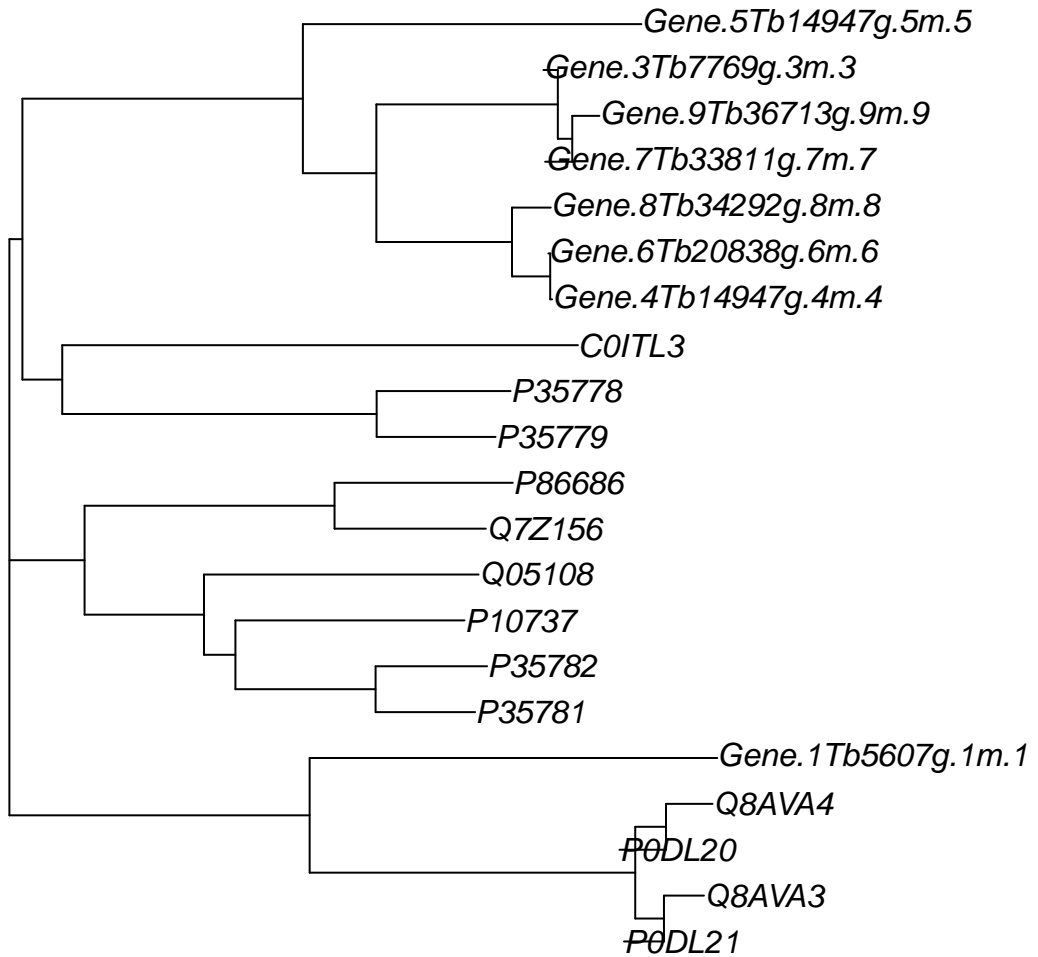

Supplement: S_F_4_T_bicarinatum_GAS.tar.gz [file S_F_4_T_bicarinatum_GAS.tar.gz]

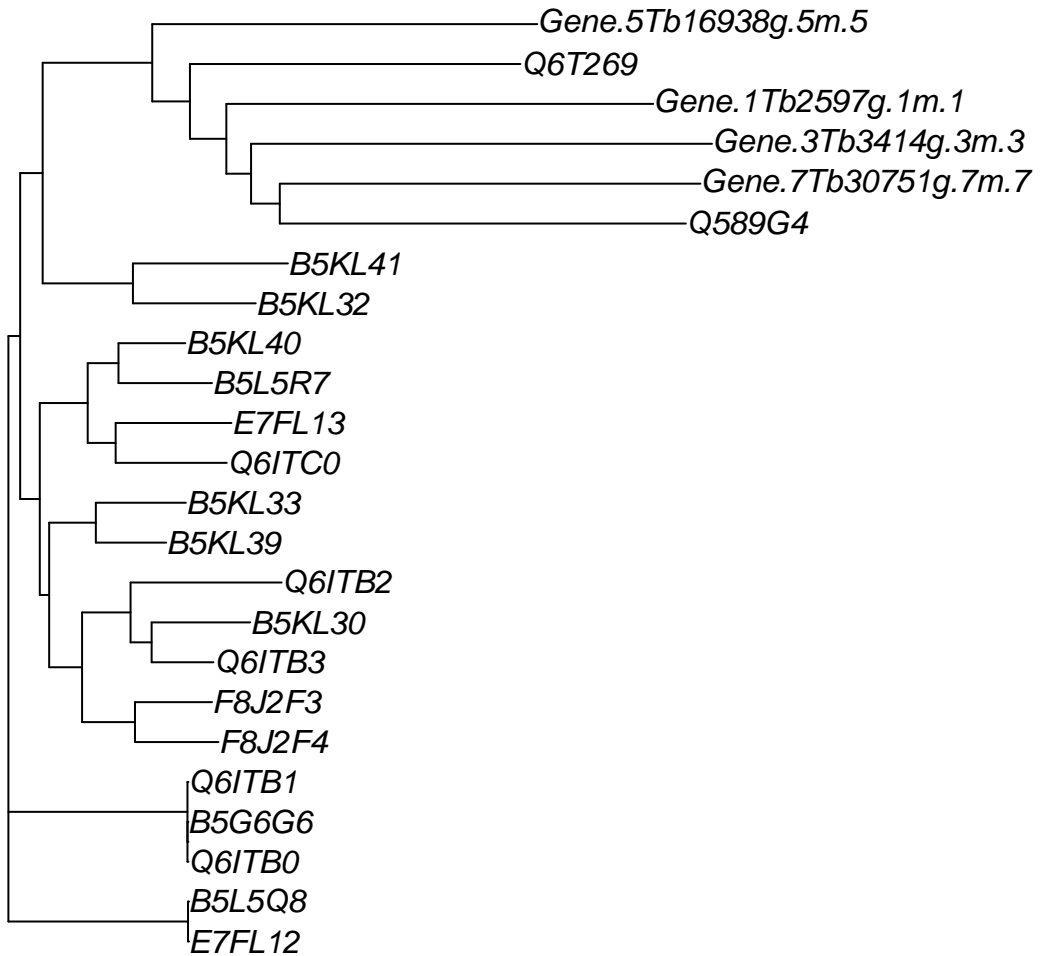

Supplement: S_F_4_T_bicarinatum_GAS.tar.gz [file S_F_4_T_bicarinatum_GAS.tar.gz]



Supplement: S_F_4_T_bicarinatum_GAS.tar.gz [file S_F_4_T_bicarinatum_GAS.tar.gz]

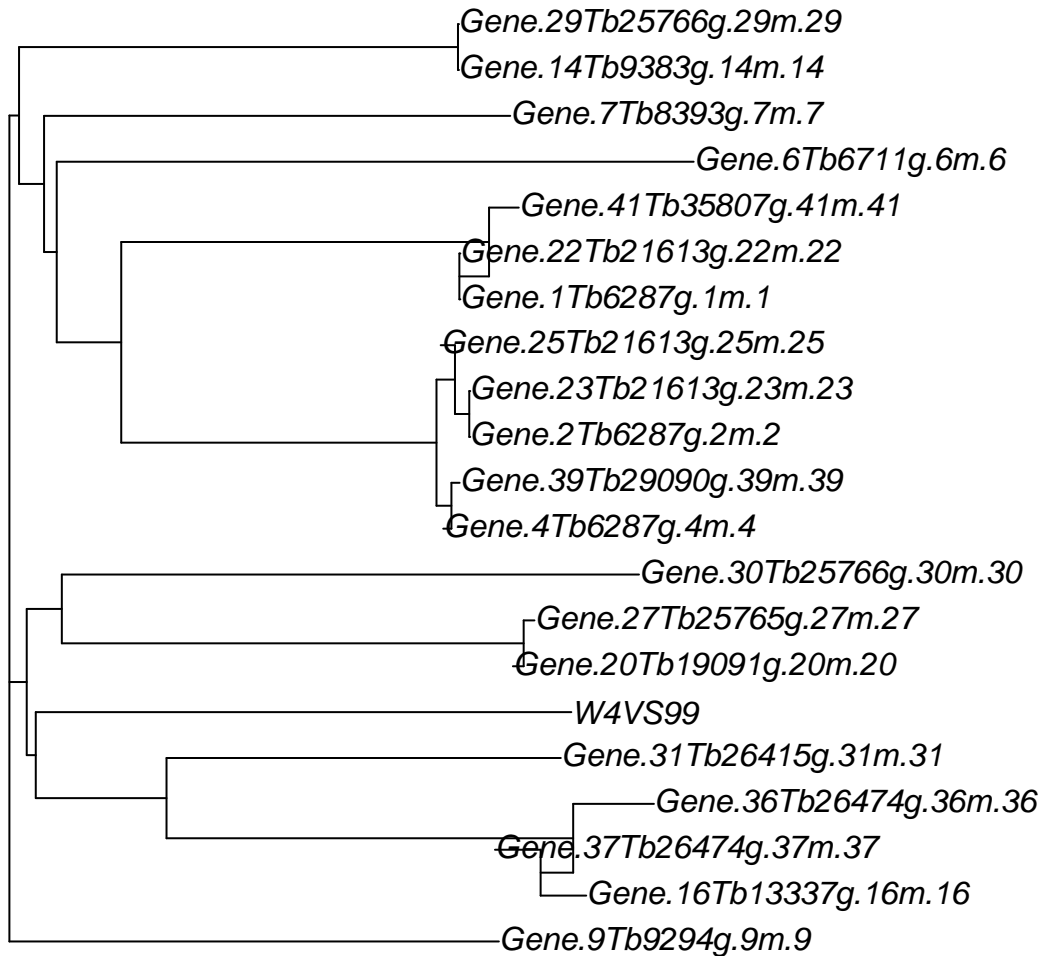

Supplement: S_F_4_T_bicarinatum_GAS.tar.gz [file S_F_4_T_bicarinatum_GAS.tar.gz]

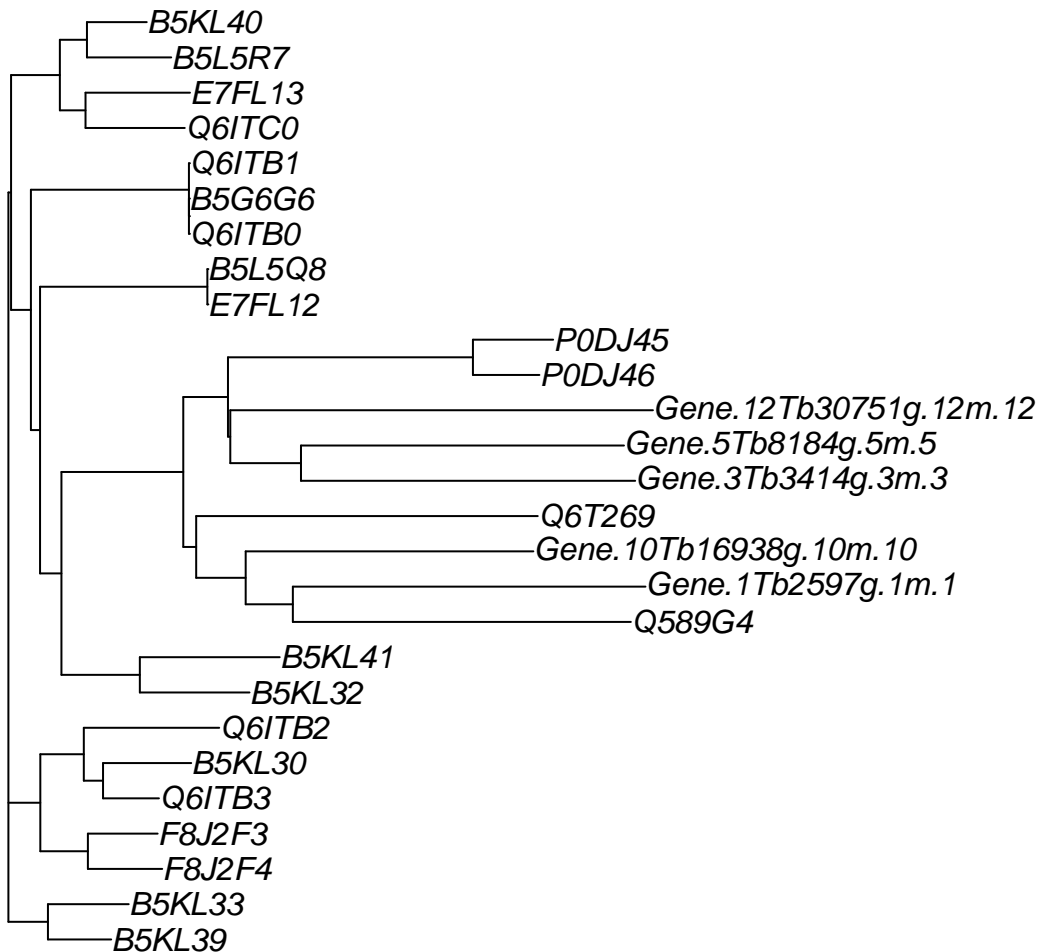

Supplement: S_F_4_T_bicarinatum_GAS.tar.gz [file S_F_4_T_bicarinatum_GAS.tar.gz]



Supplement: S_F_4_T_bicarinatum_GAS.tar.gz [file S_F_4_T_bicarinatum_GAS.tar.gz]



Supplement: S_F_4_T_bicarinatum_GAS.tar.gz [file S_F_4_T_bicarinatum_GAS.tar.gz]

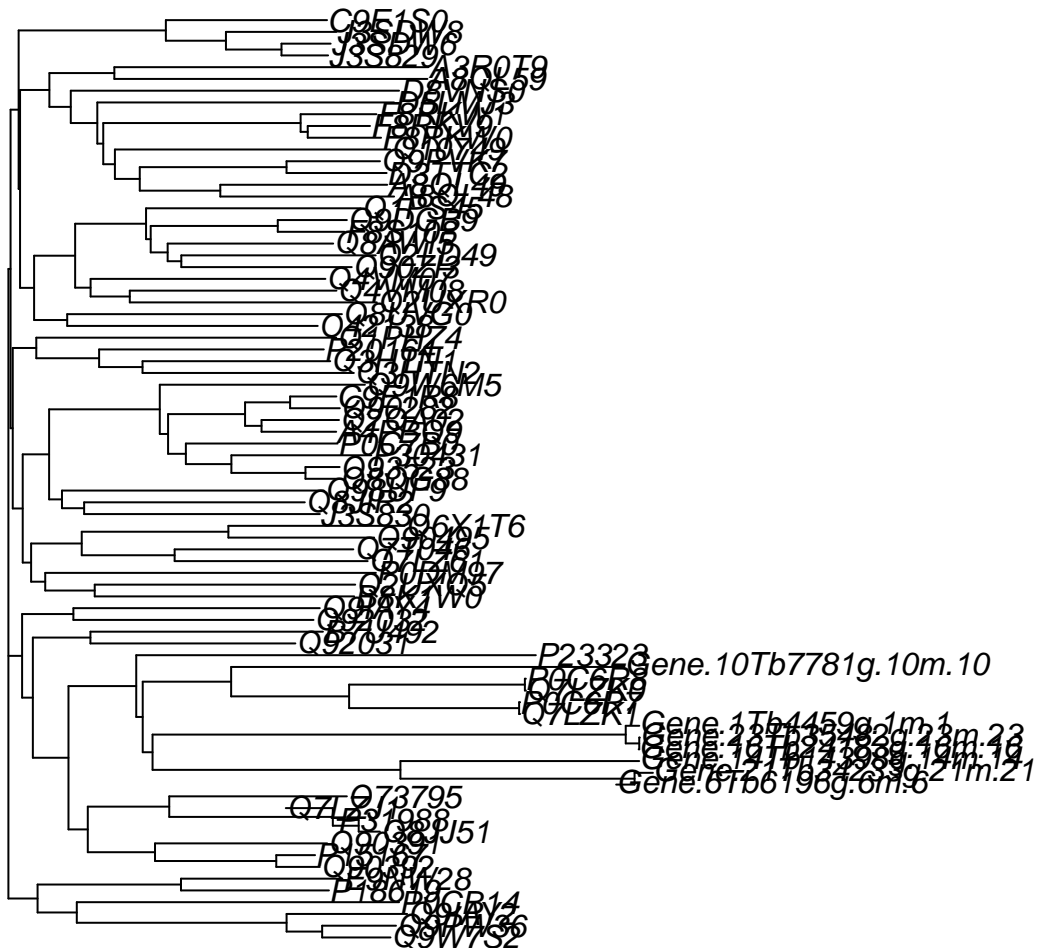

Supplement: S_F_4_T_bicarinatum_GAS.tar.gz [file S_F_4_T_bicarinatum_GAS.tar.gz]

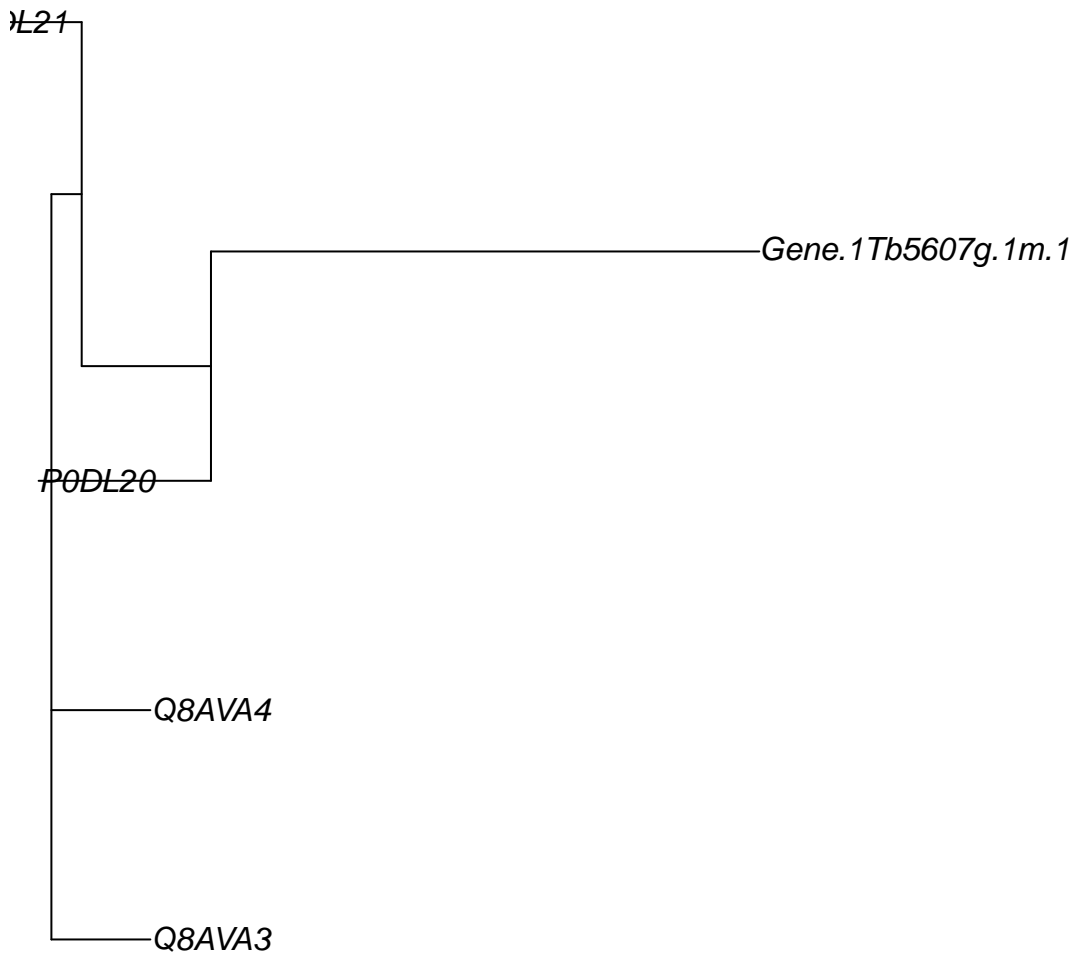

Supplement: S_F_4_T_bicarinatum_GAS.tar.gz [file S_F_4_T_bicarinatum_GAS.tar.gz]

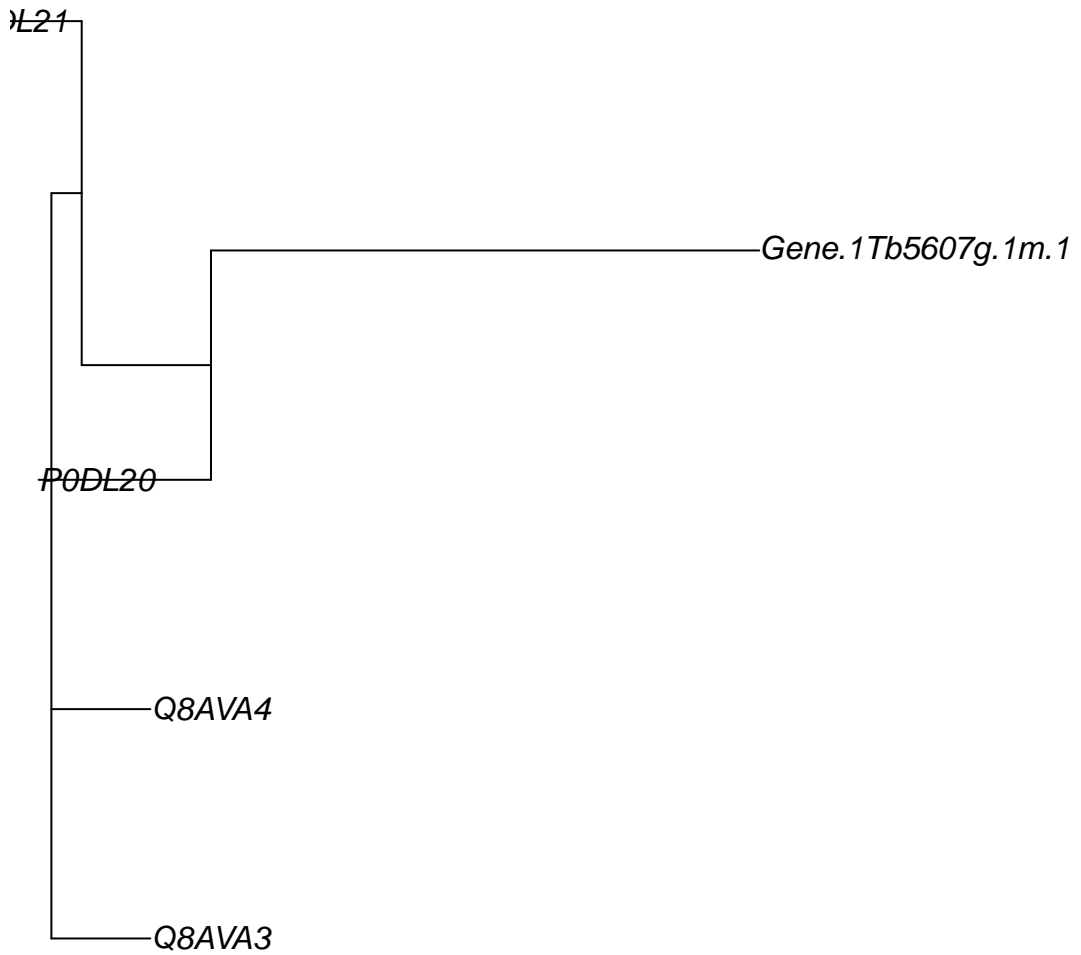

Supplement: S_F_4_T_bicarinatum_GAS.tar.gz [file S_F_4_T_bicarinatum_GAS.tar.gz]

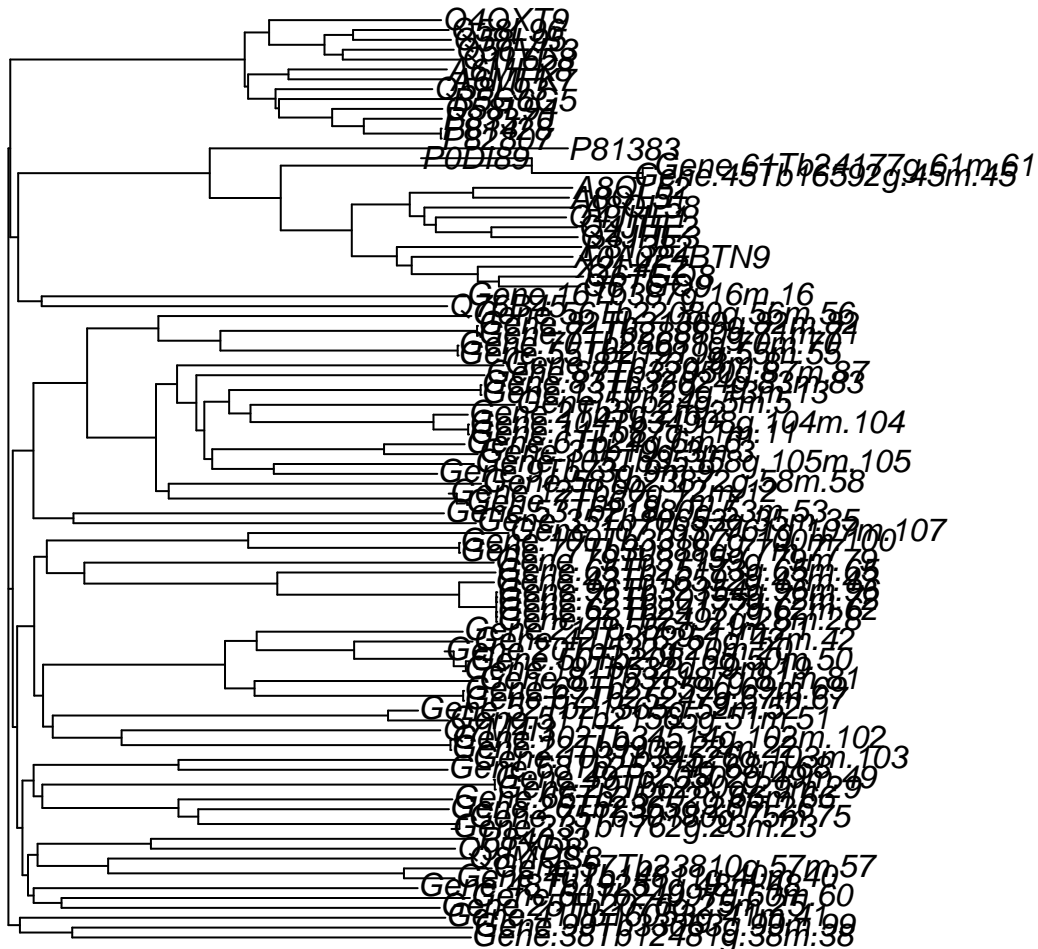

Supplement: S_F_4_T_bicarinatum_GAS.tar.gz [file S_F_4_T_bicarinatum_GAS.tar.gz]



Supplement: S_F_4_T_bicarinatum_GAS.tar.gz [file S_F_4_T_bicarinatum_GAS.tar.gz]

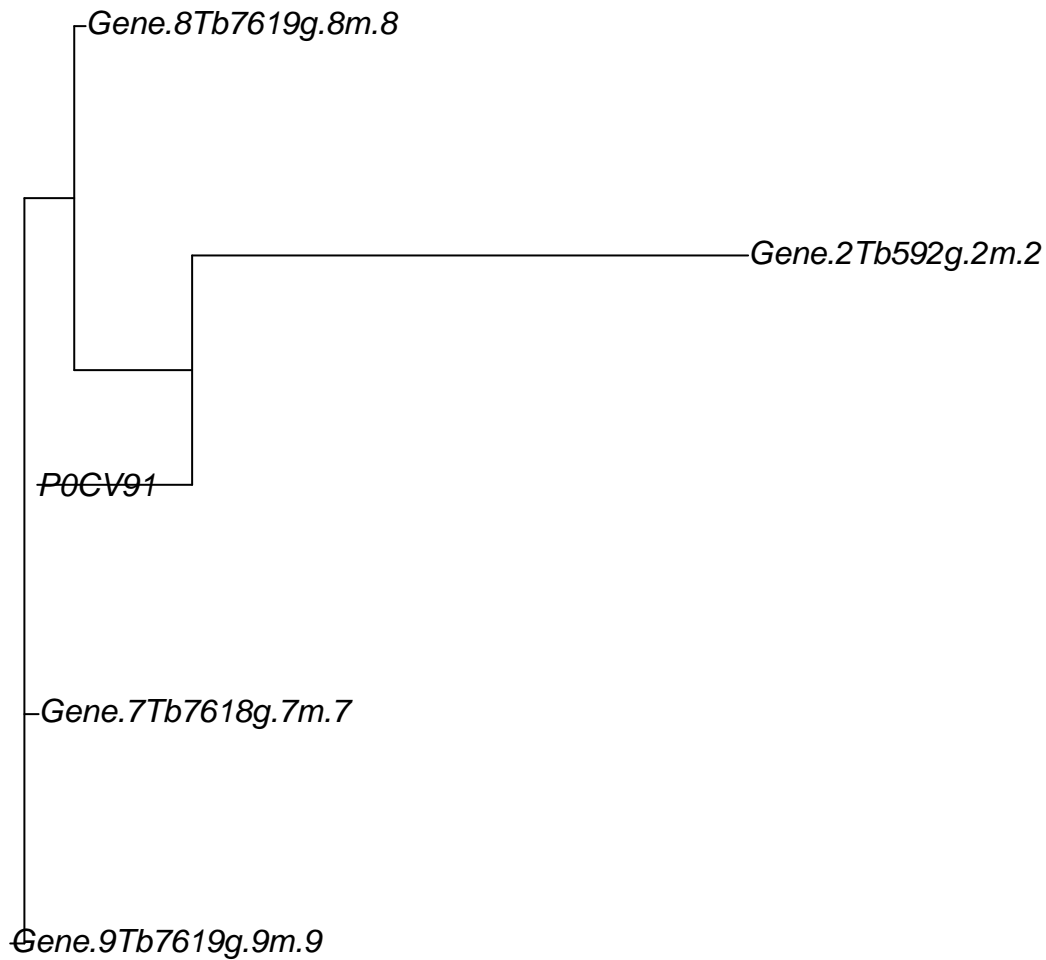

Supplement: S_F_4_T_bicarinatum_GAS.tar.gz [file S_F_4_T_bicarinatum_GAS.tar.gz]

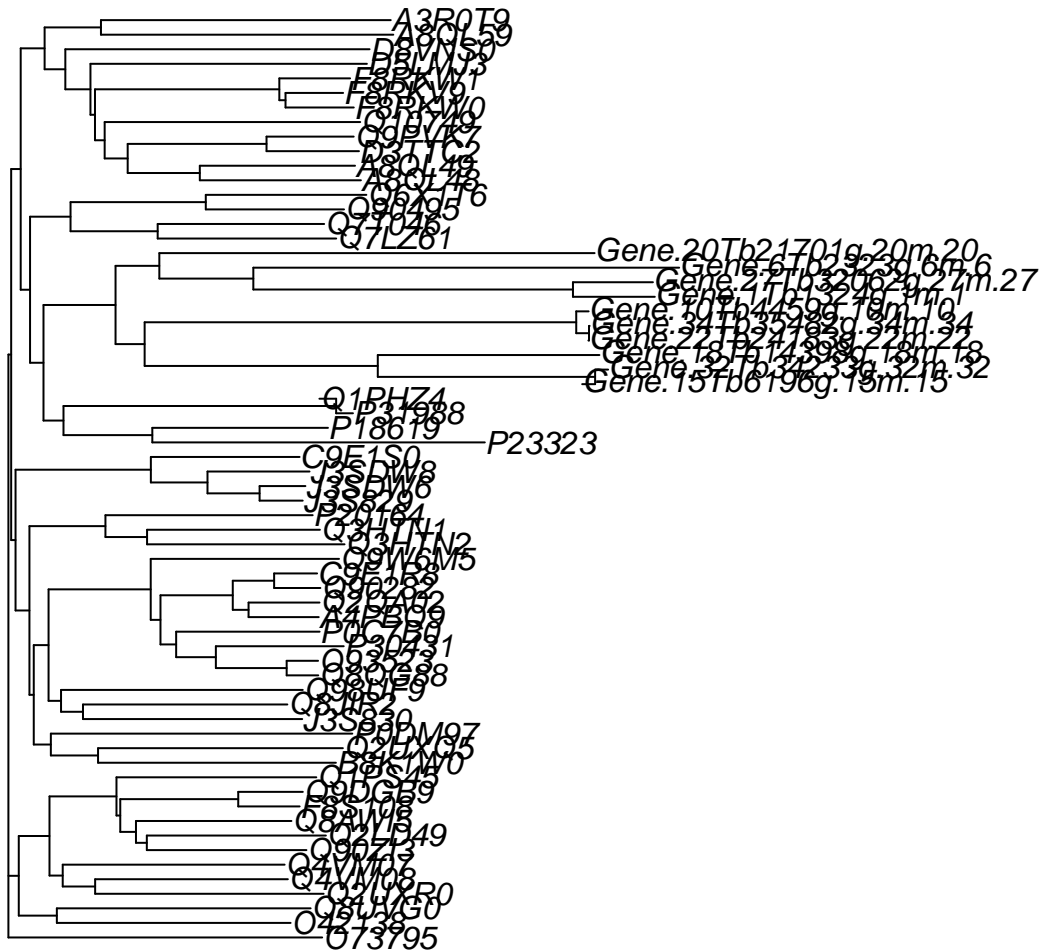

Supplement: S_F_4_T_bicarinatum_GAS.tar.gz [file S_F_4_T_bicarinatum_GAS.tar.gz]
